# Supplementary material for: The visual pigment xenopsin is widespread in protostome eyes and impacts the view on eye evolution
Source: eLife. 2020 Sep 3;9:e55193. doi: 10.7554/eLife.55193 (PMC7529461; doi:10.7554/eLife.55193)
Supplement: Figure 2—source data 1. [file elife-55193-fig2-data1.xlsx]

## Sheet: Table_accession_numbers
Sequence	Species	Accesion number	Source
Acropora digitifera opsin XP_015763203.1	Acropora digitifera	XP_015764484.1	GenBank
Acropora digitifera opsin XP_015763233.1	Acropora digitifera	XP_015769661.1	GenBank
Acropora digitifera opsin XP_015764484.1	Acropora digitifera	XP_015776718.1	GenBank
Acropora digitifera opsin XP_015769661.1	Acropora digitifera	XP_015763203.1	GenBank
Acropora digitifera opsin XP_015773304.1	Acropora digitifera	XP_015763233.1	GenBank
Acropora digitifera opsin XP_015776718.1	Acropora digitifera	XP_015773304.1	GenBank
Acropora palmata acropsin1 AFZ78084.1	Acropora palmata	AFZ78084.1	GenBank
Acropora palmata acropsin2 AFZ78085.1	Acropora palmata	AFZ78085.1	GenBank
Acropora palmata acropsin3 AFZ78086.1	Acropora palmata	AFZ78086.1	GenBank
Adineta vaga opsin GSADVT00001240001	Adineta vaga	GSADVT00001240001	Genoscope
Adineta vaga opsin GSADVT00003000001	Adineta vaga	GSADVT00003000001	Genoscope
Adineta vaga opsin GSADVT00012018001	Adineta vaga	GSADVT00012018001	Genoscope
Adineta vaga opsin GSADVT00026880001	Adineta vaga	GSADVT00026880001	Genoscope
Ambigolimax valentianus xenopsin	Ambigolimax valentianus	BBH84660.1	GenBank
Amphiura filiformis Opsin 5 A0A0A7KUZ5	Amphiura filiformis	A0A0A7KUZ5	Uniprot
Anas platyrhynchos opn3 EOA98326.1	Anas platyrhynchos	EOA98326.1	GenBank
Anolis carolinensis opn3 XP_008122094.1	Anolis carolinensis	XP_8122094.1	GenBank
Anolis carolinensis opsin-VA ACX32472.1	Anolis carolinensis	ACX32472.1	GenBank
Anolis carolinensis XP_008105273.1	Anolis carolinensis	XP_8105273.1	GenBank
Anopheles gambiae OP11 XP_312503.3	Anopheles gambiae	XP_312503.3	GenBank
Anopheles gambiae OP12 XP_312502.2	Anopheles gambiae	XP_312502.2	GenBank
Apis mellifera long wavelength opsin NP 001011639.2	Apis mellifera	NP_1011639.2	GenBank
Apis mellifera long wavelength opsin2 NP 001071293.1	Apis mellifera	NP_1071293.1	GenBank
Apis mellifera pteropsin NP 001035057.1	Apis mellifera	NP 001035057.1	GenBank
Apis mellifera UV-opsin AAC47455.1	Apis mellifera	AAC47455.1	GenBank
Argopecten irradians xenopsin1 APB88019.1	Argopecten irradians	APB88018.1	GenBank
Argopecten irradians xenopsin2 APB88018.1	Argopecten irradians	AAC47455.1	GenBank
Argopecten irradians xenopsin3 APB88017.1	Argopecten irradians	APB88017.1	GenBank
Argopecten irradians xenopsin4 APB88016.1	Argopecten irradians	APB88016.1	GenBank
Bos taurus rhodopsin P02699	Bos taurus	P02699	UniProt
Brachionus sp. C-opsin A0A0A7DN75	Brachionus sp.	A0A0A7DN75	UniProt
Brachionus sp. Melanopsin1 A0A0A7DNH5	Brachionus sp.	A0A0A7DNH5	UniProt
Brachionus sp. Melanopsin3 A0A0A7DNH9	Brachionus sp.	A0A0A7DNH9	UniProt
Branchiostoma belcheri amphiop1 Q868G4	Branchiostoma belcheri	Q868G4	UniProt
Branchiostoma belcheri amphiop4 Q868G2	Branchiostoma belcheri	Q868G2	UniProt
Branchiostoma belcheri amphiop5 Q868G1	Branchiostoma belcheri	Q868G1	UniProt
Branchiostoma belcheri amphiop6 Q868F9	Branchiostoma belcheri	Q868F9	UniProt
Branchiostoma belcheri melanopsin Q4R1I4	Branchiostoma belcheri	Q4R1I4	UniProt
Branchiostoma floridae 124039	Brachnchiostoma floridae	124039	JGI
Branchiostoma floridae 70446	Brachnchiostoma floridae	70446	JGI
Branchiostoma floridae 70447	Brachnchiostoma floridae	70447	JGI
Branchiostoma floridae 74631	Brachnchiostoma floridae	74631	JGI
Branchiostoma floridae 84890	Brachnchiostoma floridae	84890	JGI
Bugula neritina xenopsin	Bugula neritina	DAC80515.1	GenBank
Carybdea rastonii opsin B6F0Y5	Carybdea rastonii	B6F0Y5	UniProt
Ciona intestinalis OP1 Q95P33	Ciona intestinalis	Q95P33	UniProt
Cladonema radiatum opsin A9CR39	Cladonema radiatum	A9CR39	UniProt
Cladonema radiatum opsin A9CR42	Cladonema radiatum	A9CR42	UniProt
Cladonema radiatum opsin A9CR43	Cladonema radiatum	A9CR43	UniProt
Cladonema radiatum opsin A9CR51	Cladonema radiatum	A9CR51	UniProt
Cladonema radiatum opsin A9CR54	Cladonema radiatum	A9CR54	UniProt
Clonorchis sinensis Octopamine receptor GAA38219.1	Clonorchis sinensis	GAA38219.1	GenBank
Clupea harengus Parapinopsin-like XP_012681490.1	Clupea harengus	1XP_2681490.1	GenBank
Colius striatus XP_010204802.1	Colius striatus	XP_10204802.1	GenBank
Columba livia pinopsin NP 001296979.1	Columba livia	NP_1296979.1	GenBank
Columba livia VA-opsin XP_005515104.1	Columba livia	XP_5515104.1	GenBank
Crassostrea gigas melanopsin K1P6Y0	Crassostrea gigas	K1P6Y0	UniProt
Crassostrea gigas melanopsin K1PW76	Crassostrea gigas	K1PW76	UniProt
Crassostrea gigas melanopsin K1QCZ3	Crassostrea gigas	K1QCZ3	UniProt
Crassostrea gigas opsin-5 K1QW48	Crassostrea gigas	K1QW48	UniProt
Crassostrea gigas opsin-VA K1QG76	Crassostrea gigas	K1QG76	UniProt
Crassostrea gigas rhodopsin K1QMS3	Crassostrea gigas	K1QMS3	UniProt
Crassostrea gigas rhodopsin-G0 K1R620	Crassostrea gigas	K1R620	UniProt
Crassostrea gigas rhodopsin-GQ K1PPZ4	Crassostrea gigas	K1PPZ4	UniProt
Cuculus canorus opsin-VA-like XP_009563558.1	Cuculus canorus	XP_9563558.1	GenBank
Cupiennius salei C-opsin T2I5B2	Cupiennius salei	T2I5B2	UniProt
Cyprinus carpio VAL-opsin AAF74260.1	Cyprinus carpio	AAF74260.1	GenBank
Danaus plexippus blue-opsin AAU07977.1	Danaus plexippus	AAU07977.1	GenBank
Danaus plexippus long-wavelength-opsin AAU07978.1	Danaus plexippus	AAU07978.1	GenBank
Danaus plexippus pteropsin EHJ69785.1	Danaus plexippus	EHJ69785.1	GenBank
Danaus plexippus UV-opsin AAU07979.1	Danaus plexippus	AAU07979.1	GenBank
Danio rerio GREEN Q8AYM7	Danio rerio	Q8AYM7	UniProt
Danio rerio MELAN Q2KNE5	Danio rerio	Q2KNE5	UniProt
Danio rerio opn3 A9NJI7	Danio rerio	A9NJI7	UniProt
Danio rerio OPN5 Q5RIV6	Danio rerio	Q5RIV6	UniProt
Danio rerio S-WAVE Q9W6A9	Danio rerio	Q9W6A9	UniProt
Danio rerio TMT-opsin1b R9R6L5	Danio rerio	R9R6L5	UniProt
Danio rerio TMT-opsin2a R9R6C7	Danio rerio	R9R6C7	UniProt
Danio rerio TMT-opsin3a R9R6H5	Danio rerio	R9R6H5	UniProt
Danio rerio VAL-opsin BAA94288.1	Danio rerio	BAA94288.1	GenBank
Daphnia pulex arthropsin1 EFX83617.1	Daphnia pulex	EFX83617.1	GenBank
Daphnia pulex arthropsin6 EFX84250.1	Daphnia pulex	EFX84250.1	GenBank
Daphnia pulex blue-wavelength-opsin EFX75461.1	Daphnia pulex	EFX75461.1	GenBank
Daphnia pulex EFX63131.1	Daphnia pulex	EFX63131.1	GenBank
Daphnia pulex EFX70796.1	Daphnia pulex	EFX70796.1	GenBank
Daphnia pulex EFX72327.1	Daphnia pulex	EFX72327.1	GenBank
Daphnia pulex EFX77128.1	Daphnia pulex	EFX77128.1	GenBank
Daphnia pulex EFX84680.1	Daphnia pulex	EFX84680.1	GenBank
Daphnia pulex pteropsin1 EFX87345.1	Daphnia pulex	EFX87345.1	GenBank
Daphnia pulex pteropsin3 EFX87346.1	Daphnia pulex	EFX87346.1	GenBank
Daphnia pulex pteropsin4 EFX86931.1	Daphnia pulex	EFX86931.1	GenBank
Daphnia pulex pteropsin6 EFX80365.1	Daphnia pulex	EFX80365.1	GenBank
Daphnia pulex pteropsin7 EFX80367.1	Daphnia pulex	EFX80367.1	GenBank
Daphnia pulex pteropsin8 EFX80369.1	Daphnia pulex	EFX80369.1	GenBank
Daphnia pulex pteropsin9 EFX89511.1	Daphnia pulex	EFX89511.1	GenBank
Daphnia pulex UV-opsin EFX81332.1	Daphnia pulex	EFX81332.1	GenBank
Drosophila melanogaster Octopamine receptor Q9VCZ3	Drosophila melanogaster	Q9VCZ3	UniProt
Dugesia japonica r-opsin AKG27054.1	Dugesia japonica	AKG27054.1	GenBank
Echinoplana celerrima xenopsin DAB27253.1	Echinoplana celerrima	DAB27253.1	GenBank
Euperipatoides kanangrensis C-opsin T2I572	Euperipatoides kanangrensis	T2I572	UniProt
Euperipatoides kanangrensis Ek arthropsin T2I6P9	Euperipatoides kanangrensis	T2I6P9	UniProt
Euperipatoides kanangrensis Onychopsin T2I530	Euperipatoides kanangrensis	T2I530	UniProt
Exaiptasia pallida opsin KXJ10439.1	Exaiptasia pallida	KXJ10439.1	GenBank
Exaiptasia pallida opsin KXJ12800.1	Exaiptasia pallida	KXJ12800.1	GenBank
Exaiptasia pallida opsin KXJ22036.1	Exaiptasia pallida	KXJ22036.1	GenBank
Exaiptasia pallida opsin KXJ27326.1	Exaiptasia pallida	KXJ27326.1	GenBank
Fugu rubripes TMT-opsin Q8JI05	Fugu rubripes	Q8JI05	UniProt
Gallus gallus melanopsin NP 001038118.1	Gallus gallus	NP_1038118.1	GenBank
Gallus gallus opn3 XP_426139.2	Gallus gallus	NP_426139.2	GenBank
Gallus gallus peropsin Q69FK3	Gallus gallus	Q69FK3	UniProt
Gallus gallus Pinopsin P51475	Gallus gallus	P51475	UniProt
Gallus gallus TMT-opsin2 AGK25001.1	Gallus gallus	AGK25001.1	GenBank
Haplochromis burtoni VA-opsin B2CKZ8	Haplochromis burtoni	B2CKZ8	UniProt
Hasarius adansoni Peropsin E1CFG1	Hasarius adansoni	E1CFG1	UniProt
Homo sapiens Alpha-1A adrenergic receptor P35348	Homo sapiens	P35348	UniProt
Homo sapiens Dopamine receptor P21728	Homo sapiens	P21728	UniProt
Homo sapiens MELAN Q9UHM6	Homo sapiens	Q9UHM6	UniProt
Homo sapiens OPN3 Q9H1Y3	Homo sapiens	Q9H1Y3	UniProt
Homo sapiens OPN5 Q6U736	Homo sapiens	Q6U736	UniProt
Homo sapiens RGR P47804	Homo sapiens	P47804	UniProt
Hydra vulgaris Opsin F1LIN8	Hydra vulgaris	F1LIN8	UniProt
Hydra vulgaris Opsin F1LIN9	Hydra vulgaris	F1LIN9	UniProt
Hydra vulgaris Opsin F1LIP0	Hydra vulgaris	F1LIP0	UniProt
Hydra vulgaris Opsin F1LIP1	Hydra vulgaris	F1LIP1	UniProt
Hydra vulgaris Opsin F1LIP2	Hydra vulgaris	F1LIP2	UniProt
Hydra vulgaris Opsin F1LIP3	Hydra vulgaris	F1LIP3	UniProt
Hydra vulgaris Opsin F1LIP4	Hydra vulgaris	F1LIP4	UniProt
Hydra vulgaris Opsin F1LIP5	Hydra vulgaris	F1LIP5	UniProt
Hypsibius dujardini c-opsin1 GFGW01015156.1	Hypsibius dujardini	GFGW01015156.1	GenBank-TSA
Hypsibius dujardini c-opsin2 GFGW01014681.1	Hypsibius dujardini	GFGW01014681.1	GenBank-TSA
Hypsibius dujardini c-opsin3 GFGW01021326.1	Hypsibius dujardini	GFGW01021326.1	GenBank-TSA
Ictalurus punctatus Parapinopsin O42266	Ictalurus punctatus	O42266	UniProt
Idiosepius paradoxus ciliary-opsin BAR90773.1	Idiosepius paradoxus	BAR90773.1	GenBank
Idiosepius paradoxus retinochrome1 BAR90774.1	Idiosepius paradoxus	BAR90774.1	GenBank
Idiosepius paradoxus rhabdomeric-opsin1 BAR90771.1	Idiosepius paradoxus	BAR90771.1	GenBank
Iguana iguana Parapinopsin BAM28745.1	Iguana iguana	BAM28745.1	GenBank
Iguana iguana Pinopsin BAM28747.1	Iguana iguana	BAM28747.1	GenBank
Ladona fulva pteropsin FAA01167.1	Ladona fulva	FAA01167.1	GenBank
Larimichthys crocea Parapinopsin KKF08911.1	Larimichthys crocea	KKF08911.1	GenBank
Leptochiton asellus r-opsin AMB26726.1	Leptochiton asellus	AMB26726.1	GenBank
Leptochiton asellus xenopsin ASM47594.1	Leptochiton asellus	MF133514	GenBank
Limulus polyphemus Alpha-1A adrenergic receptor-like XP_013787844.1	Limulus polyphemus	XP_13787844.1	GenBank
Limulus polyphemus opsin-5-like XP_013785122.1	Limulus polyphemus	XP_13785122.1	GenBank
Limulus polyphemus peropsin1 AIT75833.1	Limulus polyphemus	AIT75833.1	GenBank
Limulus polyphemus peropsin-like XP_013776973.1	Limulus polyphemus	XP_13776973.1	GenBank
Limulus polyphemus rhodopsin-like XP_013780498.1	Limulus polyphemus	XP_13780498.1	GenBank
Limulus polyphemus rhodopsin-like XP_013782618.1	Limulus polyphemus	XP_13782618.1	GenBank
Limulus polyphemus UV-opsin XP_013784152.1	Limulus polyphemus	XP_13784152.1	GenBank
Limulus polyphemus UV-opsin-like XP_013794217.1	Limulus polyphemus	XP_13794217.1	GenBank
Lineus longissimus G0-opsin DAB27260.1	Lineus longissimus	DAB27260.1	GenBank
Lingula anatina melanopsin like XP_013397676.1	Lingula anatina	XP_13397676.1	GenBank
Lingula anatina peropsin like B XP_013400870.1	Lingula anatina	XP_013400870.1	GenBank
Lingula anatina rhodopsin GQ like A XP_013382905.1	Lingula anatina	XP_013382905.1	GenBank
Loligo forbesi rhodopsin P24603	Loligo forbesi	P24603	UniProt
Lottia gigantea 175069	Lottia gigantea	175069	JGI
Lottia gigantea 64356	Lottia gigantea	64356	JGI
Macrostomum lignano r-opsin RNA1509 41123	Macrostomum lignano	RNA1509_41123	MacGenome
Malacoceros fuliginosus c-opsin MT901640	Malacoceros fuliginosus	MT901640	GenBank
Malacoceros fuliginosus xenopsin MT901639	Malacoceros fuliginosus	MT901639	GenBank
Maritigrella crozieri xenopsin	Maritigrella crozieri	QEQ50488.1	GenBank
Mizuhopecten yessoensis G0-opsin O15974	Mizuhopecten yessoensis	O15974	UniProt
Mnemiopsis leidyi opsin1 K9LK83	Mnemiopsis leidyi	K9LK83	UniProt
Mnemiopsis leidyi opsin2 K9LLF4	Mnemiopsis leidyi	K9LLF4	UniProt
Mus musculus Melatonin RC O88495	Mus musculus	O88495	UniProt
Mus musculus opn3 NP 034228.1	Mus musculus	NP_34228.1	GenBank
Mus musculus OPN5 Q6VZZ7	Mus musculus	Q6VZZ7	UniProt
Nematostella vectensis A7RTL7	Nematostella vectensis	A7RTL7	UniProt
Nematostella vectensis A7RVG8	Nematostella vectensis	A7RVG8	UniProt
Nematostella vectensis A7RVG9	Nematostella vectensis	A7RVG9	UniProt
Nematostella vectensis A7S8K8	Nematostella vectensis	A7S8K8	UniProt
Nematostella vectensis A7SN09	Nematostella vectensis	A7SN09	UniProt
Nematostella vectensis A7SN10	Nematostella vectensis	A7SN10	UniProt
Nematostella vectensis A7SN12	Nematostella vectensis	A7SN12	UniProt
Nematostella vectensis A9UMY0	Nematostella vectensis	A9UMY0	UniProt
Nematostella vectensis A9UMY1	Nematostella vectensis	A9UMY1	UniProt
Nematostella vectensis A9UMY2	Nematostella vectensis	A9UMY2	UniProt
Nematostella vectensis A9UMY6	Nematostella vectensis	A9UMY6	UniProt
Nematostella vectensis A9UMY7	Nematostella vectensis	A9UMY7	UniProt
Nematostella vectensis A9UMY8	Nematostella vectensis	A9UMY8	UniProt
Nematostella vectensis A9UMY9	Nematostella vectensis	A9UMY9	UniProt
Nematostella vectensis A9UMZ0	Nematostella vectensis	A9UMZ0	UniProt
Nematostella vectensis A9UMZ1	Nematostella vectensis	A9UMZ1	UniProt
Nematostella vectensis A9UMZ2	Nematostella vectensis	A9UMZ2	UniProt
Nematostella vectensis A9UMZ3	Nematostella vectensis	A9UMZ3	UniProt
Nematostella vectensis A9UMZ4	Nematostella vectensis	A9UMZ4	UniProt
Nematostella vectensis A9UMZ5	Nematostella vectensis	A9UMZ5	UniProt
Nematostella vectensis A9UMZ6	Nematostella vectensis	A9UMZ6	UniProt
Nematostella vectensis opsin A9UMX9	Nematostella vectensis	A9UMX9	UniProt
Nematostella vectensis opsin A9UMY4	Nematostella vectensis	A9UMY4	UniProt
Nematostella vectensis XP_001627311.1	Nematostella vectensis	XP_1627311.1	GenBank
Nematostella vectensis XP_001631194.1	Nematostella vectensis	XP_1631194.1	GenBank
Nematostella vectensis XP_001636803.1	Nematostella vectensis	XP_1636803.1	GenBank
Owenia fusiformis xenopsin1 ASM47591.1	Owenia fusiformis	ASM47591.1	GenBank
Owenia fusiformis xenopsin2 ASM47592.1	Owenia fusiformis	ASM47592.1	GenBank
Owenia fusiformis xenopsin3 ASM47593.1	Owenia fusiformis	ASM47593.1	GenBank
Petromyzon marinus PINEAL O42490	Petromyzon marinus	O42490	UniProt
Petromyzon marinus RED B2D1T1	Petromyzon marinus	B2D1T1	UniProt
Petromyzon marinus RHOD Q98980	Petromyzon marinus	Q98980	UniProt
Platynereis dumerilii c-opsin AAV63834.1	Platynereis dumerilii	AAV63834.1	GenBank
Platynereis dumerilii c-opsin2 AUO28908.1	Platynereis dumerilii	AUO28908.1	GenBank
Platynereis dumerilii Go opsin1 AKS48306.1	Platynereis dumerilii	AKS48306.1	GenBank
Platynereis dumerilii neuropsin AIT11645.1	Platynereis dumerilii	AIT11645.1	GenBank
Platynereis dumerilii r-opsin CAC86665.1	Platynereis dumerilii	CAC86665.1	GenBank
Platynereis dumerilii r-opsin3 AGL94564.1	Platynereis dumerilii	AGL94564.1	GenBank
Platynereis dumerilii r-opsin4 AGL94565.1	Platynereis dumerilii	AGL94565.1	GenBank
Pleurobrachia bachei opsin1 S4TMC8	Pleurobrachia bachei	S4TMC8	UniProt
Pleurobrachia bachei opsin2 S4TLJ1	Pleurobrachia bachei	S4TLJ1	UniProt
Plexippus paykulli Kumopsin1 B1B1U8	Plexippus paykulli	B1B1U8	UniProt
Podarcis siculus pinopsin AAY34940.2	Podarcis siculus	AAY34940.2	GenBank
Podocryne carnea opC A9CR60	Podocryne carnea	A9CR60	UniProt
Prostheceraeus vittatus xenopsinA DAB27254.1	Prostheceraeus vittatus	DAB27254.1	GenBank
Prostheceraeus vittatus xenopsinB1 DAB27257.1	Prostheceraeus vittatus	DAB27257.1	GenBank
Prostheceraeus vittatus xenopsinB2 DAB27258.1	Prostheceraeus vittatus	DAB27258.1	GenBank
Prosthiostomum siphunculus xenopsin DAB27256.1	Prosthiostomum siphunculus	DAB27256.1	GenBank
Pterosagitta draco xenopsin1	Pterosagitta draco	DAC80518.1	GenBank
Ramazzottius varieornatus GAU87859.1	Ramazzottius varieornatus	GAU87859.1	GenBank
Ramazzottius varieornatus GAU95738.1	Ramazzottius varieornatus	GAU95738.1	GenBank
Saccoglossus kowalevskii Octopamine receptor XP_002733926.1	Saccoglossus kowalevskii	XP_2733926.1	GenBank
Schmidtea mediterranea xenopsin SMU15030838	Schmidtea mediterranea	SMU15030838	SMEDG
Sepia officinalis xenopsin1	Sepia officinalis	QHA94769.1	GenBank
Somatochlora uchidai pteropsin BAQ54737.1	Somatochlora uchidai	BAQ54737.1	GenBank
Strongylocentrotus purpuratus Melatonin RC XP_001199738.1	Strongylocentrotus purpuratus	XP_1199738.1	GenBank
Strongylocentrotus purpuratus opsin1 W4XQ82	Strongylocentrotus purpuratus	W4XQ82	UniProt
Strongylocentrotus purpuratus opsin3.2 W4ZHH1	Strongylocentrotus purpuratus	W4ZHH1	UniProt
Strongylocentrotus purpuratus opsin4 W4Z400	Strongylocentrotus purpuratus	W4Z400	UniProt
Strongylocentrotus purpuratus opsin5 W4XTI7	Strongylocentrotus purpuratus	W4XTI7	UniProt
Stylochus ellipticus xenopsinA DAB27255.1	Stylochus ellipticus	DAB27255.1	GenBank
Stylochus ellipticus xenopsinB DAB27259.1	Stylochus ellipticus	AB27259.1	GenBank
Sympetrum frequens pteropsin BAQ54695.1	Sympetrum frequens	BAQ54695.1	GenBank
Takifugu rubripes opn3 XP_003963715.1	Takifugu rubripes	XP_3963715.1	GenBank
Terebratalia transversa c-opsin ADZ24786.1	Terebratalia transversa	ADZ24786.1	GenBank
Todarodes pacificus retinochrome P23820	Todarodes pacificus	P23820	UniProt
Tribolium castaneum Dopamine receptor NP 001280543.1	Tribolium castaneum	NP_1280543.1	GenBank
Tribolium castaneum EFA01685.1	Tribolium castaneum	EFA01685.1	GenBank
Tribolium castaneum rhodopsin 1 6-like NP 001155991.1	Tribolium castaneum	NP_1155991.1	GenBank
Tribolium castaneum UV-opsin like XP_970344.1	Tribolium castaneum	XP_970344.1	GenBank
Tricellaria inopinata xenopsin	Tricellaria inopinata	MT901641	GenBank
Trichoplax adhaerens XP_002112437.1	Trichoplax adhaerens	XP_2112437.1	GenBank
Trichoplax adhaerens XP_002113363.1	Trichoplax adhaerens	XP_2113363.1	GenBank
Tripedalia cystophora C-like opsin A0A059NTC5	Tripedalia cystophora	A0A059NTC5	UniProt
Tripedalia cystophora C-like opsin A0A059NTC6	Tripedalia cystophora	A0A059NTC6	UniProt
Tripedalia cystophora C-like opsin A0A059NTC7	Tripedalia cystophora	A0A059NTC7	UniProt
Tripedalia cystophora C-like opsin A0A059NTC8	Tripedalia cystophora	A0A059NTC8	UniProt
Tripedalia cystophora C-like opsin A0A059NTD1	Tripedalia cystophora	A0A059NTD1	UniProt
Tripedalia cystophora C-like opsin A0A059NTD2	Tripedalia cystophora	A0A059NTD2	UniProt
Tripedalia cystophora C-like opsin A0A059NTD3	Tripedalia cystophora	A0A059NTD3	UniProt
Tripedalia cystophora C-like opsin A0A059NTD4	Tripedalia cystophora	A0A059NTD4	UniProt
Tripedalia cystophora C-like opsin A0A059NTD5	Tripedalia cystophora	A0A059NTD5	UniProt
Tripedalia cystophora C-like opsin A0A059NTD6	Tripedalia cystophora	A0A059NTD6	UniProt
Tripedalia cystophora C-like opsin A0A059NTD7	Tripedalia cystophora	A0A059NTD7	UniProt
Tripedalia cystophora C-like opsin A0A059NTG1	Tripedalia cystophora	A0A059NTG1	UniProt
Tripedalia cystophora C-like opsin A0A059NTG2	Tripedalia cystophora	A0A059NTG2	UniProt
Tripedalia cystophora C-like opsin A0A059NTG3	Tripedalia cystophora	A0A059NTG3	UniProt
Tripedalia cystophora C-like opsin A0A059NTG8	Tripedalia cystophora	A0A059NTG8	UniProt
Tripedalia cystophora C-like opsin A0A059NTG9	Tripedalia cystophora	A0A059NTG9	UniProt
Tripedalia cystophora Lens eye opsin A0A059UAP3	Tripedalia cystophora	A0A059UAP3	UniProt
Tripedalia cystophora neuropil expressed opsin EU310498	Tripedalia cystophora	EU310498	UniProt
Uta stansburiana PATRIET Q1L4C8	Uta stansburiana	Q1L4C8	UniProt
Xenopus laevis Dopamine receptor P42289.1	Xenopus laevis	P42289.1	UniProt
Xenopus laevis Melatonin RC1C P49219	Xenopus laevis	P49219	UniProt
Xenopus laevis RHOD P29403	Xenopus laevis	P29403	UniProt
Xenopus laevis VA-opsin NP 001165363.1	Xenopus laevis	NP_1165363.1	GenBank
Xenopus tropicalis Alpha-1A adrenergic receptor XP_002933012.2	Xenopus tropicalis	XP_2933012.2	GenBank
Xenopus tropicalis Parapinopsin Q75R39	Xenopus tropicalis	Q75R39	UniProt
Xenopus tropicalis XP_002933418.2	Xenopus tropicalis	XP_2933418.2	GenBank
Xenopus tropicalis XP_012813119.1	Xenopus tropicalis	XP_12813119.1	GenBank
Xenopus tropicalis XP_012825195.1	Xenopus tropicalis	XP_12825195.1	GenBank
