# Supplementary material for: The visual pigment xenopsin is widespread in protostome eyes and impacts the view on eye evolution
Source: eLife. 2020 Sep 3;9:e55193. doi: 10.7554/eLife.55193 (PMC7529461; doi:10.7554/eLife.55193)
Supplement: Figure 5—source data 1. [file elife-55193-fig5-data1.xlsx]

## Sheet: Sheet1
Frame	Quant25-norm	Quant50-norm	Quant75-norm
0	-6.84715	-1.20108	3.59329
1	-6.38281	-0.91141	3.82451
2	-6.26088	-0.939515	3.8125
3	-6.27783	-0.77274	3.71771
4	-6.26813	-0.908385	3.56721
5	-6.16913	-0.85133	3.61174
6	-6.17086	-0.674076	3.4266
7	-6.00595	-0.498344	3.57698
8	-6.0196	-0.202245	3.7803
9	-5.73685	-0.343788	3.85998
10	-5.57967	-0.539086	4.01345
11	-5.37158	-0.541686	4.0248
12	-5.59903	-0.618388	4.06366
13	-5.40114	-0.151678	4.14087
14	-5.33018	0.0127921	4.12316
15	-5.42724	0.00982791	4.00288
16	-5.44447	-0.156078	3.79405
17	-5.43929	-0.0671046	3.72997
18	-5.49441	-0.0757367	3.77698
19	-5.50104	-0.157402	3.76817
20	-5.41826	-0.219855	3.78092
21	-5.42332	-0.371961	3.74941
22	-5.33147	-0.515648	3.60473
23	-5.35394	-0.619948	3.47353
24	-5.415	-0.81908	3.52749
25	-5.35865	-0.712813	3.56501
26	-5.33617	-0.668163	3.58398
27	-5.15659	-0.430213	3.67384
28	-5.16991	-0.214264	3.76041
29	-5.41917	-0.592343	3.5063
30	-5.46729	-0.566395	3.406
31	-5.49873	-0.416368	3.49327
32	-5.35713	-0.250143	3.66452
33	-5.32042	-0.265799	3.54448
34	-5.34898	-0.374971	3.72105
35	-5.31761	-0.359521	3.82987
36	-5.29896	-0.327255	3.87663
37	-5.43434	-0.310797	3.65882
38	-5.84946	-0.350902	3.53875
39	-6.2636	-0.591421	3.53212
40	-6.24444	-0.614472	3.48244
41	-6.28795	-0.466271	3.45069
42	-5.85576	-0.345482	3.71017
43	-5.71992	-0.264528	3.75053
44	-5.6399	-0.288344	3.58411
45	-5.5987	-0.194585	3.98529
46	-5.42549	-0.195395	4.4508
47	-5.35983	-0.198745	4.34215
48	-5.23982	-0.196999	4.50768
49	-5.40909	-0.199495	4.88366
50	-5.29614	-0.258331	4.79828
51	-5.08424	-0.138967	4.43219
52	-5.10501	-0.197979	3.81709
53	-5.16877	-0.0220904	3.93294
54	-5.24489	0.00744541	3.94303
55	-5.33159	-0.0286997	4.02636
56	-5.33662	0.27886	4.2664
57	-5.54123	-0.198155	4.07045
58	-5.55035	-0.180567	3.84285
59	-5.09223	0.0269721	3.52606
60	-5.8624	0.181718	3.61283
61	-5.82526	0.24891	3.78598
62	-5.69909	0.273499	4.36959
63	-5.62424	0.396671	4.26267
64	-5.62549	0.408703	4.12278
65	-5.51589	0.569586	4.37987
66	-5.54471	0.297558	3.51108
67	-5.66296	0.345561	3.59887
68	-5.85241	0.354365	3.60292
69	-5.82747	0.410497	3.59699
70	-5.8895	0.292494	3.6437
71	-6.05411	0.0690734	3.62739
72	-6.10364	-0.0685544	3.63924
73	-6.04706	-0.149943	3.63895
74	-6.07051	0.0802944	3.9357
75	-5.99535	-0.0226077	3.86224
76	-5.90884	0.0679786	3.9343
77	-5.95869	0.0429803	3.9899
78	-6.07413	0.00595148	4.05837
79	-5.98187	-0.103713	4.19471
80	-5.97126	-0.00118589	4.49239
81	-6.05469	0.0486039	4.49877
82	-5.66499	0.123908	4.87483
83	-6.29354	-0.0402021	4.82643
84	-6.63658	-0.212698	4.57191
85	-6.85008	-0.368382	4.31381
86	-6.81521	-0.432104	4.17013
87	-6.47482	-0.193295	4.05085
88	-6.19411	-0.0186643	4.10905
89	-5.93741	0.0624506	4.27105
90	-5.77583	-0.017003	4.39533
91	-6.14182	-0.0740694	4.35553
92	-6.15183	-0.107561	4.43237
93	-6.20054	-0.192324	4.36155
94	-6.11995	-0.199046	4.47399
95	-6.24504	-0.226371	4.26671
96	-6.35495	-0.229012	4.04452
97	-6.5506	-0.349816	4.05302
98	-6.37263	-0.502171	3.85801
99	-6.24046	-0.543918	3.55228
100	-6.15177	-0.530867	4.00382
101	-6.48872	-0.48926	3.91293
102	-5.98954	-0.523423	3.4539
103	-5.85609	-0.322065	4.15798
104	-5.3473	-0.0388285	4.34443
105	-5.51862	-0.00381719	4.10371
106	-5.77381	0.192247	4.11281
107	-6.00243	0.39276	3.9777
108	-6.06929	0.591598	3.98368
109	-6.15921	0.458261	4.31517
110	-6.00753	0.816551	4.30796
111	-6.17279	0.497474	4.32688
112	-6.10041	0.841829	4.55916
113	-6.00792	0.424855	4.59199
114	-5.99317	0.651028	4.73138
115	-5.59785	0.60519	4.71486
116	-4.95146	0.617535	5.01249
117	-5.33189	0.43489	5.12215
118	-5.16838	0.274165	5.14528
119	-4.96841	0.427771	5.30704
120	-5.15996	0.154687	5.20412
121	-4.73949	0.306395	5.29204
122	-4.89966	0.00118589	5.21246
123	-4.60019	-0.0382245	5.28438
124	-4.71123	-0.157756	5.31733
125	-4.98806	-0.21294	5.30557
126	-5.16523	-0.228052	5.18162
127	-4.98539	-0.219121	5.34701
128	-5.46772	-0.196328	5.29765
129	-5.64981	-0.198449	5.19112
130	-5.58391	-0.186942	5.15335
131	-5.54124	-0.287636	5.17189
132	-5.25139	-0.248559	5.27071
133	-5.78261	-0.199014	5.17325
134	-5.86435	-0.237212	5.04413
135	-5.82944	-0.203508	5.46307
136	-5.74573	-0.203587	5.46133
137	-5.75597	-0.208113	5.42399
138	-5.65449	-0.018443	5.47394
139	-5.91951	-0.128881	5.32589
140	-5.93935	-0.0862118	5.24146
141	-5.95167	0.0342452	5.01935
142	-5.86882	0.202008	5.17973
143	-5.99711	0.243558	5.05287
144	-6.0393	0.236159	4.77059
145	-6.02475	0.407778	4.95
146	-5.14748	0.531741	5.18949
147	-5.53642	0.604435	5.16652
148	-5.13726	0.900223	5.09402
149	-4.4076	0.999333	4.89668
150	-5.22488	0.687698	4.68298
151	-4.26472	1.0956	4.59485
152	-3.64054	1.54592	4.55859
153	-3.65499	1.47111	4.53527
154	-3.69145	1.33339	4.62585
155	-3.63071	1.39548	4.55939
156	-3.60393	1.24528	4.43021
157	-3.53836	1.21606	4.35922
158	-3.48195	0.692456	4.29414
159	-4.0114	0.408242	4.27056
160	-3.84205	0.438459	4.25989
161	-3.86279	0.462509	4.17795
162	-5.1165	0.337942	4.19937
163	-4.82708	0.190293	4.25217
164	-4.09103	0.413286	4.2422
165	-4.83274	0.227945	4.23658
166	-4.62028	0.368253	4.22956
167	-4.36425	0.228282	4.04057
168	-4.74067	-0.0519939	3.95113
169	-4.69763	0.0419172	3.97287
170	-4.9159	0.0365243	3.96876
171	-4.2827	0.636772	4.12188
172	-4.50182	0.75463	4.2122
173	-4.63961	0.873436	4.19203
174	-4.89082	0.943952	3.99904
175	-4.76978	0.997147	4.144
176	-5.18097	0.860332	4.21469
177	-5.22239	0.93696	3.87713
178	-5.15151	0.925032	3.82276
179	-5.28828	1.30246	3.85593
180	-5.31782	1.15357	3.86167
181	-5.24607	1.27124	3.82074
182	-5.40197	0.573843	3.90783
183	-5.19725	0.923916	4.00028
184	-5.31839	0.867189	3.77826
185	-5.37445	0.794832	3.74581
186	-5.52822	0.61975	3.61771
187	-5.48704	1.03057	4.14531
188	-5.16803	1.10365	4.12368
189	-5.45521	0.829009	3.9624
190	-5.52222	0.836141	3.99079
191	-5.44955	0.974346	4.11623
192	-5.40805	1.11111	4.13385
193	-5.43109	1.1071	4.1365
194	-5.25037	1.12735	4.27321
195	-5.16139	1.08613	4.24292
196	-5.06929	1.0683	4.24641
197	-4.9676	1.04804	4.22992
198	-4.75162	0.998549	4.32156
199	-4.65401	1.10965	4.32979
200	-4.67182	0.714742	4.13412
201	-4.38365	1.025	4.14161
202	-4.4092	1.1248	4.34752
203	-4.59022	1.1425	4.35793
204	-4.58651	1.19004	4.36572
205	-4.47813	1.25186	4.33952
206	-4.46881	1.30021	4.35513
207	-4.3683	1.46727	4.3974
208	-3.9216	1.48954	4.40423
209	-3.59415	1.60325	4.44102
210	-3.91394	1.53473	4.20893
211	-4.59765	1.30956	4.20908
212	-4.48502	1.05509	4.24596
213	-4.36322	1.10854	4.15026
214	-4.49587	0.903261	3.98761
215	-5.06534	1.04554	4.09618
216	-5.48585	1.09747	4.08728
217	-4.47208	1.04949	3.99506
218	-4.32164	1.1017	4.38455
219	-4.15989	1.19064	4.35123
220	-4.43313	1.12298	4.41671
221	-4.85101	1.08267	4.40664
222	-4.87506	1.12323	4.4445
223	-4.8049	1.15446	4.54639
224	-4.86276	1.20604	4.54621
225	-5.24395	1.20922	4.43748
226	-4.06817	1.18532	4.39609
227	-3.69915	1.14406	4.51545
228	-3.72043	1.1522	4.62575
229	-3.66798	1.24987	4.53437
230	-5.34467	1.04041	4.38453
231	-5.02425	1.02179	4.24825
232	-5.14526	0.762862	3.98391
233	-3.84479	1.16557	3.88581
234	-4.11298	0.877349	3.84623
235	-3.81969	1.056	3.73047
236	-4.39851	0.90901	3.67265
237	-4.1486	0.991779	3.78371
238	-3.93452	0.881202	3.83909
239	-4.55076	0.890401	3.73255
240	-4.83186	0.558899	3.49275
241	-4.60173	0.845304	3.52391
242	-4.0058	0.880844	3.52121
243	-3.95572	0.958184	3.66482
244	-3.6619	1.04967	3.76465
245	-3.7623	0.898239	3.65464
246	-3.59771	0.962662	3.78025
247	-3.57541	0.96896	3.4222
248	-3.46113	0.892912	3.40275
249	-3.7017	0.666173	3.38923
250	-3.52942	0.641812	3.38256
251	-3.493	0.540816	3.33837
252	-3.90655	0.440113	3.31997
253	-3.41506	0.33645	3.4206
254	-3.33798	0.410978	3.37927
255	-3.30107	0.391846	3.37629
256	-3.26759	0.417891	3.37312
257	-3.1691	0.452278	3.39717
258	-3.488	0.111512	3.22015
259	-3.64997	-0.0231928	3.30273
260	-3.44425	0.0392853	3.3351
261	-3.47314	0.0303062	3.49691
262	-3.51395	0.0579705	3.43947
263	-3.48221	0.0331708	3.37072
264	-3.19347	0.337268	3.51638
265	-3.11433	0.204548	3.4903
266	-3.58794	0.236198	3.51136
267	-3.22188	0.338023	3.59005
268	-3.37226	0.405933	3.57851
269	-3.53577	0.35889	3.43781
270	-3.80779	0.190507	3.33366
271	-3.63384	0.280635	3.57723
272	-3.34258	0.24128	3.7182
273	-3.38767	0.266802	3.87704
274	-3.12113	0.385056	4.0702
275	-3.41009	0.266816	4.08018
276	-3.70469	0.0362098	4.03556
277	-3.5422	0.0456342	4.10604
278	-3.6453	-0.0483785	4.19842
279	-3.61776	0.0175183	4.26928
280	-3.68023	-0.0638613	4.14452
281	-3.6869	-0.114663	4.15624
282	-3.62508	-0.0387588	4.39212
283	-3.60058	-0.0396164	4.53258
284	-3.61108	0.0228642	4.69243
285	-3.621	0.117054	4.8633
286	-3.7001	0.132194	5.04605
287	-3.73532	0.207518	4.99535
288	-3.7479	0.287638	5.06881
289	-3.71605	0.412427	5.29993
290	-3.70942	0.158799	4.69011
291	-3.7271	0.14368	4.8788
292	-3.79969	0.164079	5.27612
293	-4.24216	-0.00327488	5.25581
294	-4.19362	0.0378761	5.30496
295	-4.35078	-0.00308818	5.19867
296	-4.53309	0.0195485	5.31172
297	-4.66138	0.0181585	5.51148
298	-4.7631	-0.00538672	4.91751
299	-4.9262	-0.0174972	5.04855
300	-4.97949	-0.0315851	5.19172
301	-5.00359	0.155312	5.4704
302	-4.93459	0.282736	5.53542
303	-4.7776	0.203149	5.04205
304	-4.83305	0.257979	4.84593
305	-4.76317	0.29755	5.48265
306	-4.73916	0.186685	4.78397
307	-4.08871	0.255557	5.16748
308	-4.00817	0.143116	5.05826
309	-4.16962	0.0768808	4.99707
310	-4.48982	-0.0647424	4.21239
311	-4.33717	-0.0469606	4.23049
312	-4.71701	-0.140615	4.09828
313	-4.73358	-0.0717362	4.05609
314	-4.4405	-0.261047	3.88979
315	-4.70768	-0.286009	3.3437
316	-4.80959	-0.282872	3.36768
317	-4.85145	-0.274123	3.65672
318	-5.02117	-0.270127	3.65213
319	-5.11452	-0.255288	3.82084
320	-5.17064	-0.265443	3.83072
321	-4.97949	-0.261347	4.314
322	-4.36643	-0.0841056	4.32411
323	-4.55756	-0.226199	4.35499
324	-4.54838	0.0431516	5.06544
325	-4.65403	-0.125451	4.75685
326	-4.58004	-0.00607838	5.16158
327	-4.53753	-0.0350238	4.45512
328	-4.70715	-0.228092	4.47357
329	-4.81506	-0.283018	4.59174
330	-4.99514	-0.329001	4.73222
331	-4.99348	-0.329944	4.63541
332	-5.17202	-0.595442	4.44087
333	-5.35203	-0.551505	4.43229
334	-5.33955	-0.468911	4.55299
335	-5.276	-0.311234	4.54404
336	-5.27807	-0.256547	4.56518
337	-5.10902	-0.197538	4.62203
338	-5.22173	-0.282474	4.58199
339	-4.99795	-0.353999	4.63646
340	-4.84099	-0.588755	4.67077
341	-4.75079	-0.755895	4.67574
342	-4.69077	-0.768489	4.71714
343	-4.57797	-0.273114	4.67587
344	-4.65645	-0.534414	4.66085
345	-4.6732	-0.647572	4.63129
346	-4.6882	-0.622555	4.62791
347	-4.68131	-0.317648	4.61273
348	-4.74792	-0.26508	4.59625
349	-4.62982	-0.162788	4.73073
350	-4.75931	-0.251683	4.75536
351	-4.91675	-0.351189	4.77862
352	-5.02201	-0.424005	4.71612
353	-5.10817	-0.734317	4.63019
354	-5.00798	-0.645569	4.71935
355	-5.16487	-0.856369	4.67413
356	-5.0238	-1.0553	4.36582
357	-4.78598	-0.72569	4.56335
358	-4.70596	-0.556254	4.50337
359	-4.39766	-0.26193	4.51591
360	-4.40728	-0.42122	4.39861
361	-4.80052	-0.860225	4.10017
362	-4.72588	-0.58089	4.18195
363	-4.41953	-0.353689	4.30121
364	-4.37019	-0.266616	4.18923
365	-4.52431	-0.214065	4.25142
366	-4.54972	-0.140475	4.26064
367	-4.50082	-0.186988	4.14606
368	-4.23776	-0.181764	4.28891
369	-4.22665	-0.237604	4.33329
370	-4.44831	-0.267068	4.38624
371	-4.40729	-0.396981	4.48102
372	-4.46058	-0.419979	4.67747
373	-4.38895	-0.392121	4.63068
374	-3.88404	-0.341106	4.54344
375	-3.92861	-0.386454	4.51484
376	-4.06768	-0.302551	4.4884
377	-4.07038	-0.204516	4.6115
378	-4.1871	-0.422304	3.92882
379	-4.03666	-0.258144	4.11659
380	-4.17563	-0.40126	4.02319
381	-4.18294	-0.278195	3.90784
382	-4.46492	-0.237746	3.78327
383	-3.74297	-0.212582	3.76102
384	-3.67094	-0.190075	3.87662
385	-3.5036	0.184184	4.19297
386	-3.64432	-0.184774	3.72016
387	-3.45128	-0.176793	3.91718
388	-3.69862	-0.211971	3.60467
389	-3.5659	-0.208631	3.61679
390	-3.64545	-0.250402	3.33021
391	-3.92323	-0.196419	3.36637
392	-4.1397	-0.280433	3.18114
393	-4.20034	-0.104548	3.7475
394	-4.34973	-0.170337	3.14036
395	-4.16128	-0.0782294	3.19146
396	-4.32002	-0.161744	3.28982
397	-4.38748	-0.254109	3.3044
398	-4.42905	-0.161875	3.48709
399	-4.40433	-0.127813	3.9668
400	-4.25152	-0.191432	4.55007
401	-4.218	-0.240755	4.63869
402	-4.21013	-0.0884883	4.73345
403	-4.16291	0.11196	5.18025
404	-4.17374	0.213308	5.30615
405	-4.23035	0.224904	5.09969
406	-4.14542	0.249906	5.31759
407	-4.46495	0.260054	5.32983
408	-4.80145	0.287351	4.79083
409	-4.98952	0.0972103	3.99356
410	-5.07631	0.30794	4.66414
411	-4.38622	0.773736	5.07116
412	-4.45929	0.730082	4.7658
413	-4.76131	0.428274	4.39711
414	-4.42602	0.416452	5.3419
415	-4.40817	0.856194	5.22188
416	-4.48947	0.824096	4.97644
417	-4.66408	0.862717	4.4175
418	-4.91961	0.684941	3.99739
419	-4.65293	0.808575	4.01104
420	-4.72337	0.598429	3.79065
421	-4.86416	0.314664	3.74814
422	-4.96624	0.37356	3.61574
423	-5.14652	0.328959	3.5182
424	-5.15993	0.55847	3.37835
425	-4.93605	0.978431	3.38899
426	-5.2766	1.0072	3.35491
427	-4.81894	1.05922	3.46799
428	-5.24345	1.00596	3.62678
429	-5.51987	0.942256	3.44992
430	-5.52598	0.908363	3.46067
431	-4.99782	0.872609	3.482
432	-5.12564	0.865001	3.52801
433	-4.6696	0.872087	4.39756
434	-5.0341	0.808916	4.18163
435	-4.94047	0.864405	4.3662
436	-4.99506	0.326632	3.3545
437	-5.21283	0.0769787	3.28604
438	-4.97204	0.3608	3.35661
439	-5.12047	0.0576184	3.46329
440	-5.41338	-0.0910187	3.6316
441	-5.5715	-0.326759	3.47141
442	-5.82376	-0.432412	3.43127
443	-5.61556	-0.276986	3.68276
444	-5.33539	-0.242058	3.79055
445	-5.28945	-0.0888284	3.95524
446	-5.3009	0.000671731	4.3282
447	-5.28807	-0.0758186	4.57676
448	-5.49195	-0.19055	4.52554
449	-5.24566	-0.128381	4.3689
450	-5.01591	0.404116	4.65959
451	-5.01319	0.179908	4.68261
452	-4.89418	-0.0731241	4.51495
453	-4.98444	-0.177349	4.36073
454	-4.83532	-0.000537078	4.54742
455	-5.02938	0.0894991	4.64473
456	-4.95545	0.119421	4.79564
457	-5.59856	-0.171275	4.16693
458	-5.24022	-0.00379115	4.88056
459	-5.37297	-0.00621865	4.90465
460	-5.34515	0.289946	4.90853
461	-5.16643	0.340524	4.83953
462	-5.32909	0.147987	4.71737
463	-5.31028	0.102437	4.75973
464	-5.37251	-0.0571019	4.61828
465	-5.65124	-0.106369	4.50654
466	-5.81731	-0.431793	4.26109
467	-5.63492	-0.262517	4.32546
468	-5.20238	-0.106629	4.26248
469	-5.14499	-0.0786381	4.1863
470	-5.24611	-0.324787	4.09491
471	-5.12223	-0.264602	3.77631
472	-5.2636	-0.412983	3.46961
473	-5.38095	-0.677585	3.2543
474	-5.34562	-0.538444	3.41027
475	-5.44846	-1.05066	3.16101
476	-5.30897	-0.260864	3.13033
477	-4.99354	-0.263154	3.09392
478	-5.04495	-0.706389	2.94417
479	-5.07497	-0.962167	2.67584
480	-4.93598	-0.885294	2.69255
481	-4.90722	-0.991433	2.63022
482	-5.00906	-0.965773	2.60341
483	-5.00772	-1.06589	2.51244
484	-4.95373	-0.92031	2.45403
485	-5.22992	-1.43008	2.34021
486	-5.31925	-1.01382	2.20661
487	-5.49926	-1.29391	2.17244
488	-5.28084	-1.13217	1.92546
489	-5.88919	-1.7693	1.51558
490	-5.73757	-1.23568	1.57406
491	-6.00272	-1.54138	1.48069
492	-5.72494	-1.56799	1.37367
493	-6.26971	-1.66418	1.16244
494	-5.01039	-1.69562	1.18479
495	-5.6238	-1.88285	0.921917
496	-6.06798	-2.11099	0.576469
497	-5.93462	-2.28573	0.4191
498	-6.69771	-2.5522	0.269069
499	-6.32112	-2.47843	0.275091
500	-6.46186	-2.51782	0.339323
501	-7.57148	-2.71707	0.379943
502	-7.63801	-2.97984	0.393625
503	-7.42999	-3.07114	0.375862
504	-7.85147	-3.2654	0.356457
505	-7.41355	-3.22614	0.478062
506	-7.42665	-3.16865	0.75519
507	-7.52667	-3.04977	0.734663
508	-7.70712	-3.09101	0.86091
509	-8.02475	-3.27276	0.620977
510	-7.88481	-3.28216	0.757369
511	-7.84727	-3.38975	0.658879
512	-7.84779	-3.86963	0.553449
513	-7.62497	-3.75991	0.45712
514	-7.48497	-3.86611	0.388421
515	-7.65865	-3.82227	0.586473
516	-7.1702	-3.78736	0.767815
517	-7.9039	-3.99236	0.63625
518	-8.14776	-3.71326	0.737899
519	-8.12942	-4.05645	0.506531
520	-8.53573	-4.63116	0.252733
521	-8.73704	-4.77665	0.192068
522	-8.53327	-4.12017	0.288832
523	-8.22708	-4.21788	0.23002
524	-9.03857	-5.39686	0.100027
525	-8.70247	-4.30497	0.158461
526	-9.33215	-4.40192	0.341818
527	-8.37608	-3.75725	0.352696
528	-8.68835	-4.19938	0.361205
529	-8.84701	-4.30554	0.379881
530	-8.72964	-4.01542	0.581025
531	-8.90068	-4.54319	0.330193
532	-9.48283	-4.99706	0.0770155
533	-9.3899	-4.95436	0.0510591
534	-9.80947	-5.2381	-0.204104
535	-9.93323	-5.5313	-0.233445
536	-9.69391	-5.38558	-0.174288
537	-9.793	-5.49149	-0.206897
538	-9.85245	-5.45888	-0.106069
539	-10.0821	-5.51796	0.0147457
540	-10.193	-5.72059	0.100536
541	-10.2413	-5.81721	0.277455
542	-10.059	-5.76652	0.27075
543	-10.37	-5.70974	0.232463
544	-10.2214	-5.62346	0.305064
545	-10.2894	-5.54588	0.209886
546	-10.0055	-5.37968	0.189122
547	-10.2222	-5.21344	0.214876
548	-10.1353	-5.7272	-0.035564
549	-9.9734	-6.70701	-0.300603
550	-9.85867	-5.55336	-0.0389385
551	-9.93464	-5.53213	-0.101826
552	-10.0657	-5.91629	-0.256975
553	-10.16	-6.41972	-0.273367
554	-10.2431	-6.48031	-0.268571
555	-10.1808	-6.36745	-0.269808
556	-10.2414	-6.21782	-0.272202
557	-10.3965	-7.42329	-0.524768
558	-10.351	-7.23547	-0.478845
559	-10.3651	-7.29576	-0.669059
560	-10.307	-7.58323	-1.08124
561	-10.2411	-7.52732	-0.761337
562	-10.2183	-7.52398	-0.857443
563	-10.3948	-7.70143	-0.79661
564	-10.399	-7.51938	-0.646357
565	-10.2854	-7.49136	-0.501675
566	-10.3429	-6.79535	-0.415621
567	-10.3214	-7.16977	-0.64137
568	-10.2433	-6.78575	-0.535905
569	-10.3653	-7.2766	-0.775065
570	-10.2631	-6.8638	-0.677332
571	-9.94253	-6.05694	0.140171
572	-10.0452	-6.15467	-0.00480688
573	-10.1663	-6.94838	-0.153521
574	-10.0722	-7.40675	-0.725273
575	-10.0011	-6.58954	-0.515179
576	-10.0551	-6.39482	-0.463381
577	-10.2273	-7.04385	-0.529149
578	-10.374	-7.46216	-0.397771
579	-10.3996	-7.53132	-0.718488
580	-10.3338	-7.38725	-0.905139
581	-10.3872	-7.47448	-0.908238
582	-10.3824	-6.84259	-0.597392
583	-10.3687	-6.9201	-0.642063
584	-10.3725	-6.90776	-0.66911
585	-10.4333	-7.25326	-0.985348
586	-10.3861	-7.03827	-1.08221
587	-10.2716	-6.97612	-1.21693
588	-10.0563	-7.23148	-1.28345
589	-10.2374	-7.30283	-1.51383
590	-10.2468	-7.5003	-1.70698
591	-10.1242	-7.31261	-1.32595
592	-10.1817	-7.48139	-1.31737
593	-10.3815	-7.63501	-1.40994
594	-10.3951	-7.72211	-1.59816
595	-10.358	-7.67641	-1.49163
596	-10.3387	-7.67639	-1.61289
597	-10.2232	-7.30682	-1.51929
598	-10.1748	-7.22952	-1.39518
599	-10.2208	-7.09544	-1.54807
600	-10.4572	-7.58811	-1.98203
601	-10.4229	-7.61186	-2.07276
602	-10.3495	-7.48721	-2.05546
603	-10.277	-7.57635	-2.21238
604	-10.2132	-7.61352	-2.18751
605	-10.2725	-7.72313	-2.22371
606	-10.3283	-7.77989	-2.18823
607	-10.4015	-7.87009	-2.11712
608	-10.3746	-7.87511	-2.09218
609	-10.2997	-7.82847	-2.10308
610	-10.3976	-7.88783	-2.6247
611	-10.3839	-7.97324	-2.26247
612	-10.3664	-7.97834	-2.16186
613	-10.3465	-8.00939	-2.46164
614	-10.4308	-8.20307	-2.45362
615	-10.4122	-8.26024	-2.512
616	-10.3416	-8.04101	-2.25476
617	-10.4183	-7.98033	-2.21199
618	-10.3925	-7.98532	-1.7362
619	-10.3214	-7.85738	-1.7048
620	-10.3487	-7.91053	-1.7497
621	-10.4503	-8.03734	-2.21826
622	-10.3243	-7.87743	-2.03289
623	-10.2815	-7.79417	-2.3969
624	-10.3249	-7.87886	-2.60477
625	-10.2889	-7.906	-2.70858
626	-10.3448	-8.01332	-2.70866
627	-10.3302	-8.01371	-2.72601
628	-10.2963	-7.57974	-1.8183
629	-10.3014	-7.51602	-1.29458
630	-10.1252	-7.43199	-0.996056
631	-10.3186	-7.45197	-1.19
632	-10.3687	-7.43865	-1.06387
633	-10.3003	-7.47852	-0.97997
634	-10.3532	-8.02355	-1.72166
635	-10.436	-7.85091	-2.0884
636	-10.4578	-7.86077	-2.01961
637	-10.431	-7.7305	-2.51999
638	-10.4458	-7.51072	-1.07891
639	-10.3617	-7.61979	-1.4801
640	-10.3145	-7.43162	-1.47142
641	-10.3711	-7.1786	-0.416849
642	-10.3424	-7.61938	-1.2604
643	-10.2452	-7.39777	-0.598731
644	-10.2524	-7.34999	-0.86136
645	-10.2942	-7.43152	-1.96313
646	-10.3538	-7.36598	-1.18009
647	-10.3203	-7.16583	-1.25679
648	-10.1977	-7.08849	-1.94663
649	-10.2933	-7.87264	-2.60823
650	-10.3379	-7.85923	-2.61559
651	-10.3262	-7.4921	-2.63165
652	-10.4505	-7.37038	-2.24052
653	-10.4873	-7.62364	-2.33546
654	-10.4764	-7.64287	-2.24874
655	-10.4881	-7.82368	-2.40465
656	-10.4704	-7.84915	-2.3833
657	-10.4901	-7.94155	-2.53692
658	-10.4294	-7.87286	-2.36948
659	-10.44	-7.83064	-2.5832
660	-10.4871	-7.72894	-2.73129
661	-10.4462	-7.64918	-2.82265
662	-10.4051	-7.19947	-2.40891
663	-10.3632	-6.94216	-2.3575
664	-10.2305	-6.90159	-1.9529
665	-10.2297	-6.89844	-1.55141
666	-10.2678	-6.86601	-1.28682
667	-10.31	-6.97566	-1.45109
668	-10.2501	-6.81894	-1.01921
669	-10.3782	-6.86969	-1.8367
670	-10.2639	-6.91595	-2.00734
671	-10.3418	-6.78868	-1.79669
672	-10.3024	-7.25238	-2.3761
673	-10.2185	-7.31427	-2.74773
674	-10.07	-7.18056	-2.7241
675	-10.026	-7.02994	-2.6494
676	-9.77586	-6.84046	-2.6055
677	-9.7674	-6.82666	-2.65409
678	-9.69299	-6.62775	-2.6817
679	-9.64455	-6.57377	-2.62056
680	-9.76845	-6.49514	-2.24082
681	-9.76876	-6.4165	-2.569
682	-9.83383	-6.24842	-1.88775
683	-10.0117	-6.48797	-2.20003
684	-9.7701	-6.33422	-2.08198
685	-9.38913	-6.12645	-2.02346
686	-9.32759	-6.18921	-2.01152
687	-9.82416	-6.35506	-2.0306
688	-9.64053	-6.31382	-2.07563
689	-9.56489	-6.18598	-1.8922
690	-9.50696	-6.1868	-1.85354
691	-9.37931	-6.0912	-1.96027
692	-9.23195	-5.99712	-1.81169
693	-9.14807	-5.87591	-1.87725
694	-9.03605	-5.67289	-1.35545
695	-9.06158	-5.48153	-1.42315
696	-9.09117	-5.40557	-1.77908
697	-9.21012	-5.27791	-1.58758
698	-9.39409	-5.24234	-1.7509
699	-9.3161	-5.26877	-1.51258
700	-9.22399	-5.34559	-1.51611
701	-9.0089	-5.35547	-1.25741
702	-8.89555	-5.49772	-1.12179
703	-8.75937	-5.57785	-0.988621
704	-8.74805	-5.53442	-1.26467
705	-8.73636	-5.90772	-1.49955
706	-8.68338	-6.02789	-1.85411
707	-8.52652	-6.06717	-1.77637
708	-8.47894	-6.03111	-1.67278
709	-8.33443	-6.22031	-1.76374
710	-8.18296	-6.11033	-1.61087
711	-8.42781	-5.69826	-0.744858
712	-8.59674	-5.88652	-0.954154
713	-8.36186	-5.92114	-1.07477
714	-8.53129	-5.97568	-0.888186
715	-8.24742	-5.84735	-0.628645
716	-8.39357	-6.03801	-0.619831
717	-8.32811	-5.93322	-0.560318
718	-8.09611	-5.79393	-0.529803
719	-8.00071	-5.64676	-0.4652
720	-7.80532	-5.62557	-0.592446
721	-7.86509	-5.57421	-0.473049
722	-8.03328	-5.35292	-0.459689
723	-8.04214	-5.16321	-0.310604
724	-7.83969	-5.11402	-0.0922919
725	-7.71957	-5.00874	0.159412
726	-7.57748	-5.07665	-0.313239
727	-7.34268	-4.79701	0.256221
728	-7.24232	-4.76404	0.912207
729	-7.42917	-4.86233	0.308179
730	-7.4294	-4.8944	0.245718
731	-7.63143	-4.95997	-0.238374
732	-7.8724	-4.97216	-0.0841384
733	-7.81826	-4.90085	0.0214052
734	-7.31399	-4.66095	0.717637
735	-7.77126	-4.96734	0.360655
736	-7.90937	-4.89474	0.571107
737	-7.80669	-4.61829	0.853759
738	-7.59019	-4.4478	1.08424
739	-7.68474	-4.35658	1.10777
740	-7.91915	-4.39289	0.915001
741	-7.91067	-4.34594	0.781635
742	-8.15284	-4.39446	0.649921
743	-8.43409	-4.44348	0.775054
744	-8.19869	-4.65537	0.4925
745	-8.36671	-4.34162	0.500503
746	-8.35427	-4.45527	0.499959
747	-8.30388	-4.23041	0.606373
748	-8.5137	-4.32654	0.619221
749	-8.57638	-4.24823	0.721063
750	-8.46254	-4.10435	0.825269
751	-8.69345	-4.11439	0.916849
752	-8.65301	-4.01528	1.29524
753	-8.53428	-3.92893	1.72731
754	-8.39696	-3.90086	2.14242
755	-8.32663	-3.87041	1.73131
756	-8.26542	-3.88288	1.66108
757	-8.28581	-3.8956	1.67281
758	-8.37619	-3.78762	1.73364
759	-8.47124	-3.76793	1.49597
760	-8.28324	-3.73708	1.91201
761	-8.38096	-3.71734	1.54209
762	-8.28456	-3.97515	1.31502
763	-8.40321	-4.06445	1.33935
764	-8.24816	-3.8464	1.48477
765	-8.28709	-3.83767	1.46898
766	-8.39106	-3.86375	1.42335
767	-8.3087	-3.63668	2.42761
768	-8.11728	-3.73909	2.13391
769	-8.42484	-3.66929	1.9054
770	-8.50608	-3.69796	1.78832
771	-7.85136	-3.54477	2.23376
772	-8.35664	-3.63472	2.04272
773	-8.58499	-3.59754	2.03858
774	-8.32558	-3.47339	2.072
775	-8.61735	-3.58761	2.14527
776	-8.82927	-3.47227	2.20555
777	-8.84388	-3.41076	2.25708
778	-8.59399	-3.44909	2.29894
779	-8.19764	-3.34351	2.33816
780	-8.18423	-3.25316	2.46474
781	-7.96815	-3.39467	1.97901
782	-7.6956	-3.34107	2.19679
783	-7.55808	-3.40444	2.35803
784	-7.71748	-3.44812	2.25864
785	-7.83869	-3.69238	2.10131
786	-7.91459	-3.74394	2.11132
787	-7.84411	-3.52127	2.24166
788	-7.0999	-3.48981	2.35456
789	-7.64148	-3.60347	1.88353
790	-7.94419	-3.74702	1.70787
791	-7.79221	-3.7803	2.06244
792	-7.61394	-3.72024	1.7103
793	-7.33223	-3.55414	1.73817
794	-7.17378	-3.28538	1.82495
795	-6.9712	-3.14222	1.92013
796	-6.93912	-3.03297	1.83048
797	-6.90486	-2.96367	1.7482
798	-7.01275	-2.93655	1.64886
799	-6.74867	-2.87973	1.53512
800	-6.98935	-3.15169	1.1615
801	-6.98897	-3.09548	0.933072
802	-7.06625	-3.08653	0.896072
803	-7.09556	-2.94194	0.903442
804	-7.01414	-2.8294	0.933577
805	-7.16019	-2.94518	0.956496
806	-7.21695	-2.93087	0.948266
807	-7.16695	-3.0439	0.839124
808	-7.1746	-3.06782	0.929166
809	-7.17152	-3.3532	0.956499
810	-6.9171	-2.89627	0.974852
811	-6.88333	-2.99189	0.975768
812	-7.1225	-3.34819	0.940368
813	-6.93956	-3.16221	1.31122
814	-6.82289	-3.07956	1.60835
815	-6.78713	-2.848	1.45035
816	-6.78629	-3.01577	1.25617
817	-6.86231	-2.97304	1.42954
818	-6.91018	-3.40804	1.09651
819	-6.95832	-3.38458	1.17097
820	-6.94007	-3.36023	1.21664
821	-7.03243	-3.39056	1.14539
822	-7.1638	-3.77077	0.703517
823	-7.11295	-3.53632	0.975612
824	-7.17898	-3.55788	0.883107
825	-7.16758	-3.43209	1.19407
826	-7.15307	-3.45733	0.925407
827	-7.13695	-3.52037	0.987272
828	-7.12847	-3.69673	1.15467
829	-7.36987	-3.67762	1.32219
830	-6.75764	-3.41418	1.39052
831	-7.48484	-3.50416	1.25376
832	-7.41384	-3.34051	1.19424
833	-7.01748	-3.10947	0.988303
834	-7.02255	-2.93738	0.82706
835	-6.76093	-2.80201	0.637548
836	-6.81146	-2.84107	0.929705
837	-5.96029	-2.42359	1.44887
838	-5.58221	-2.0181	1.46195
839	-6.67015	-2.04756	1.38324
840	-6.51015	-2.26497	1.33116
841	-6.30992	-2.47139	1.35749
842	-7.11215	-2.71629	0.369897
843	-6.83322	-2.75453	0.821975
844	-6.79889	-2.89998	1.10934
845	-6.97575	-2.93706	1.28125
846	-7.10523	-2.86654	1.26978
847	-7.11218	-2.87017	1.11413
848	-6.9817	-2.74169	1.29313
849	-6.99563	-2.69553	1.34857
850	-7.05872	-2.90816	1.17
851	-7.06141	-3.17006	0.902877
852	-7.11053	-3.33831	0.917766
853	-6.85457	-3.38307	1.04642
854	-6.68789	-3.27561	0.950764
855	-6.51664	-3.09662	1.11913
856	-6.49826	-3.20113	1.13492
857	-6.35727	-3.2295	1.20812
858	-6.20217	-3.05634	1.28685
859	-6.22064	-2.81071	1.33298
860	-6.06029	-2.66893	1.22696
861	-6.01396	-2.46602	1.21982
862	-6.12984	-2.70656	1.22337
863	-6.27878	-2.95248	1.03575
864	-6.57923	-3.27907	1.00301
865	-6.23259	-3.29265	1.15056
866	-6.26014	-3.53029	1.18731
867	-6.95357	-3.68066	1.17625
868	-6.81698	-3.83205	1.01409
869	-6.82935	-3.78353	1.2065
870	-6.64152	-3.29288	1.50971
871	-6.80932	-3.96032	1.19088
872	-6.98534	-4.10618	1.40885
873	-6.97487	-3.39667	1.69659
874	-6.70533	-2.94622	1.72324
875	-6.7064	-2.42833	2.13987
876	-6.30379	-3.44274	2.10607
877	-6.31528	-3.364	2.15979
878	-6.39869	-3.56387	2.1505
879	-6.44986	-3.77585	1.62994
880	-6.44486	-3.88984	1.11537
881	-6.83705	-3.84326	1.2354
882	-6.64626	-3.87962	1.44041
883	-7.13752	-4.12929	1.37684
884	-7.08145	-4.13636	1.55882
885	-7.00682	-4.31719	1.42035
886	-6.88683	-4.398	1.32387
887	-6.95748	-4.33736	1.65306
888	-7.31066	-4.7474	0.610503
889	-7.18321	-4.50641	0.593698
890	-7.16521	-3.88486	0.758932
891	-7.05706	-3.77279	0.919087
892	-7.16897	-3.64808	1.38874
893	-7.19732	-3.72916	1.51111
894	-7.09343	-3.33392	1.89644
895	-7.1966	-3.31128	1.62613
896	-7.24625	-3.18075	1.46276
897	-7.2826	-3.24893	1.31636
898	-7.2307	-3.55125	1.15352
899	-7.31475	-3.61401	0.876549
900	-7.28136	-3.36452	0.686002
901	-7.2436	-3.20633	0.94939
902	-7.25699	-3.2014	1.35984
903	-7.26727	-3.32575	1.19926
904	-7.4119	-3.47172	1.22842
905	-7.38333	-3.30889	1.12562
906	-7.39364	-3.23821	1.19594
907	-7.32242	-3.17753	1.23505
908	-7.2426	-3.16131	1.23295
909	-7.26651	-3.16304	1.18085
910	-7.41833	-3.08732	1.07593
911	-7.4351	-3.06103	1.00384
912	-7.36929	-2.79437	0.926261
913	-7.13531	-2.55339	1.22532
914	-7.22536	-2.72101	0.730479
915	-7.11221	-2.87452	0.899589
916	-7.0028	-2.9305	1.09071
917	-7.70294	-3.02975	0.739005
918	-7.5052	-3.00311	0.870246
919	-7.53801	-2.92297	0.822441
920	-7.31593	-2.93177	0.966176
921	-7.23179	-2.6007	1.30936
922	-7.2847	-2.6354	1.49313
923	-7.41629	-2.55788	1.57481
924	-7.45467	-2.37716	1.63733
925	-7.14283	-2.35569	1.69941
926	-6.7855	-2.0542	1.63413
927	-6.77859	-1.94699	1.59234
928	-7.37559	-2.14206	1.28842
929	-7.47958	-2.40445	0.435322
930	-7.38772	-2.37121	1.55398
931	-7.34437	-1.96774	1.56682
932	-7.24371	-2.21207	1.49743
933	-6.76404	-2.13653	1.57165
934	-7.71278	-2.16153	1.49301
935	-7.50761	-2.21715	1.52872
936	-7.35075	-2.1713	1.73363
937	-7.23065	-2.24805	1.8434
938	-6.75121	-2.26917	2.02862
939	-6.73014	-2.1548	2.0708
940	-7.07192	-2.23305	1.66085
941	-7.24649	-2.16359	1.63691
942	-7.37745	-1.99092	1.57666
943	-7.5034	-1.82044	1.65878
944	-7.57192	-2.14724	1.52277
945	-7.78159	-2.21912	1.55497
946	-7.68927	-2.10665	1.35015
947	-7.50649	-2.06578	1.48195
948	-7.74079	-2.14382	1.50476
949	-7.86264	-2.22162	1.41637
950	-7.78994	-2.26633	1.46847
951	-7.76055	-2.30914	1.72742
952	-7.43571	-2.2027	1.78382
953	-7.91512	-2.44862	1.54995
954	-7.44973	-1.68414	2.10817
955	-7.43941	-1.57344	2.58962
956	-7.47377	-1.58328	2.65939
957	-7.48214	-1.86646	2.3393
958	-7.46329	-1.77921	2.66334
959	-7.55553	-2.00428	2.20094
960	-7.94989	-2.67112	0.703788
961	-8.02821	-2.60037	1.43045
962	-8.00148	-2.45847	1.35525
963	-8.31711	-3.03566	0.593471
964	-8.30359	-2.77363	1.00095
965	-8.25134	-2.64353	1.22334
966	-7.94957	-2.28032	1.73213
967	-7.91754	-2.41455	1.32257
968	-7.9369	-2.38737	2.06593
969	-7.7647	-2.20007	2.36741
970	-7.64702	-2.37303	2.26453
971	-7.6266	-2.33516	2.07379
972	-7.89256	-2.53395	1.9184
973	-8.0398	-2.79104	2.13613
974	-8.02696	-2.95616	2.04097
975	-8.08544	-2.94535	2.07803
976	-8.27966	-2.94158	1.88669
977	-8.22413	-2.72102	2.21774
978	-7.54562	-2.53277	2.2112
979	-7.50426	-2.40915	2.16325
980	-7.3099	-2.0164	2.36331
981	-7.23684	-2.00359	2.07668
982	-7.39558	-2.28383	2.07039
983	-7.49855	-2.49908	2.08235
984	-7.15595	-2.39748	2.40476
985	-6.79556	-2.53163	2.52727
986	-6.42882	-2.36457	2.41627
987	-6.66903	-2.47335	2.27546
988	-6.76309	-2.55661	2.13938
989	-6.46974	-2.29104	2.24363
990	-6.13744	-1.83041	2.87424
991	-6.24737	-1.76043	2.99514
992	-6.41722	-1.85068	2.62726
993	-6.739	-1.63937	2.63316
994	-6.76414	-1.50292	2.96734
995	-6.60571	-1.60093	2.8829
996	-6.49224	-1.19457	3.05778
997	-6.50904	-1.62283	2.93674
998	-6.67763	-1.62271	2.38205
999	-6.79358	-1.6119	2.33791
1000	-6.82368	-1.42	2.36093
1001	-6.87097	-1.54982	2.33466
1002	-7.13936	-2.87031	2.1506
1003	-7.12275	-2.29532	2.23167
1004	-6.88698	-1.96869	2.09274
1005	-6.80217	-1.77737	2.07695
1006	-6.86247	-2.55542	2.05386
1007	-6.89158	-2.44312	2.16529
1008	-7.23444	-2.53277	2.18068
1009	-7.21615	-2.3628	2.41473
1010	-7.19303	-2.36186	2.2337
1011	-7.27358	-2.49412	2.18948
1012	-7.12289	-2.34359	2.25564
1013	-7.01099	-2.09248	2.51906
1014	-7.01122	-2.03324	2.41167
1015	-6.96403	-1.88133	2.74329
1016	-6.92335	-1.86253	2.73331
1017	-6.85285	-1.90294	2.78289
1018	-6.67401	-1.75972	2.99766
1019	-6.5094	-1.58096	3.12426
1020	-6.53916	-1.84414	3.2413
1021	-6.59881	-1.79905	3.24515
1022	-6.27384	-1.82366	3.19905
1023	-6.05799	-1.44117	3.42729
1024	-6.24365	-1.7863	3.16621
1025	-6.01919	-1.30668	4.28195
1026	-5.993	-1.27473	3.90332
1027	-5.87399	-1.03985	3.62154
1028	-5.63135	-0.970646	3.69297
1029	-5.72896	-1.17891	3.62854
1030	-5.73368	-1.22795	3.65977
1031	-5.78675	-1.27423	3.75148
1032	-6.12496	-1.63998	3.75959
1033	-6.04364	-1.58683	3.87109
1034	-6.10676	-1.50735	3.8088
1035	-6.31435	-1.45189	3.5338
1036	-6.37717	-1.77401	3.30299
1037	-6.28299	-1.73738	3.53074
1038	-6.39742	-1.83941	3.39528
1039	-5.79759	-1.42832	3.34835
1040	-5.94118	-1.68183	3.15231
1041	-5.88003	-1.67558	2.91684
1042	-5.87696	-2.0004	2.7801
1043	-5.88059	-2.39389	2.34378
1044	-6.25283	-2.79757	2.50341
1045	-6.19267	-2.27693	2.52752
1046	-5.76483	-2.14981	2.44532
1047	-6.23651	-2.85631	2.40318
1048	-6.08451	-2.46914	2.44273
1049	-6.12427	-2.09058	2.4784
1050	-5.96947	-1.8499	2.55396
1051	-5.86316	-2.06257	2.82578
1052	-5.82171	-2.28338	2.83414
1053	-5.81279	-2.35251	2.78775
1054	-5.96662	-2.27488	2.69623
1055	-6.05639	-2.29478	2.68172
1056	-5.90244	-1.6389	2.93229
1057	-5.96265	-1.96383	2.75483
1058	-6.14616	-1.92354	2.78465
1059	-6.18199	-1.46945	2.81572
1060	-6.14143	-2.00259	2.72204
1061	-6.09633	-2.03431	2.48947
1062	-5.86043	-1.97936	2.52918
1063	-5.83766	-1.80218	2.58135
1064	-5.91515	-1.69373	2.62809
1065	-5.88306	-1.76777	2.58319
1066	-5.95542	-1.92701	2.94221
1067	-5.89215	-2.09454	2.90284
1068	-6.08019	-1.92432	2.9569
1069	-6.25486	-1.94595	2.59691
1070	-6.16295	-1.75191	2.53086
1071	-6.58337	-1.82063	2.32715
1072	-6.60431	-1.76584	2.13355
1073	-6.21095	-1.71649	2.17037
1074	-6.16051	-1.72586	2.30447
1075	-5.95847	-1.58022	2.44104
1076	-6.08053	-1.73623	2.40478
1077	-4.89598	-1.15617	2.73391
1078	-6.40357	-1.76746	2.53192
1079	-6.29998	-1.76221	2.58972
1080	-6.32663	-1.67659	2.82112
1081	-6.42308	-1.59524	2.84998
1082	-6.41609	-1.33553	2.93295
1083	-6.37023	-1.41074	2.78644
1084	-6.34323	-1.53057	2.17504
1085	-6.49339	-2.01061	1.99118
1086	-6.51603	-2.02624	1.83771
1087	-6.5119	-2.37933	1.70758
1088	-6.51292	-2.15776	1.97811
1089	-6.50018	-1.86794	2.12331
1090	-6.506	-2.1012	2.18222
1091	-6.39489	-2.35611	2.32685
1092	-6.3673	-2.56375	2.27209
1093	-6.42715	-2.70346	2.26319
1094	-6.58348	-2.87415	1.89396
1095	-6.58596	-2.61278	2.43456
1096	-6.39322	-2.45162	2.37778
1097	-6.40871	-1.90511	2.76604
1098	-6.57549	-2.07101	2.41716
1099	-6.10125	-1.84168	2.75566
1100	-6.20386	-1.66493	2.22776
1101	-6.36632	-1.59932	2.87844
1102	-6.39525	-1.60322	2.83639
1103	-6.39079	-2.01144	2.72327
1104	-5.62335	-2.20039	2.64877
1105	-5.94948	-1.6037	2.59146
1106	-6.19735	-2.39808	2.27683
1107	-6.18653	-2.46859	2.30661
1108	-6.12061	-2.4541	2.38968
1109	-6.0457	-2.55373	2.43293
1110	-6.04977	-2.60294	2.58144
1111	-5.68155	-2.69077	2.79461
1112	-5.94545	-2.72419	2.84154
1113	-5.87516	-2.62524	3.12981
1114	-6.70914	-2.73301	3.10312
1115	-6.56924	-2.56044	3.13488
1116	-6.54196	-2.50323	3.38177
1117	-6.49455	-2.43804	3.41631
1118	-6.50847	-2.46631	3.64115
1119	-6.56283	-2.54879	3.49022
1120	-6.654	-2.64726	3.37521
1121	-6.74761	-2.73639	3.48905
1122	-6.59944	-2.81185	3.02217
1123	-6.52883	-2.3533	3.64995
1124	-6.58364	-2.3852	3.1986
1125	-6.5895	-2.65542	3.25633
1126	-6.65112	-2.5947	3.51788
1127	-6.64468	-2.69795	3.69206
1128	-6.64284	-2.6611	3.54248
1129	-6.55969	-2.48861	3.78393
1130	-6.17519	-2.05869	4.18419
1131	-6.47515	-2.16356	4.43137
1132	-6.42106	-2.14675	4.55807
1133	-6.46391	-2.24555	4.39589
1134	-6.50817	-2.58629	3.98207
1135	-6.37835	-2.34375	4.07907
1136	-6.49807	-2.23699	3.18029
1137	-6.61886	-2.08436	3.44016
1138	-6.44881	-2.05262	3.59038
1139	-6.46179	-2.00676	3.52535
1140	-6.41318	-1.91754	3.89094
1141	-6.48736	-1.62763	4.09486
1142	-6.61996	-1.87193	3.68414
1143	-6.96341	-2.035	2.61452
1144	-6.41901	-1.51488	3.02727
1145	-6.54911	-1.90224	2.83955
1146	-6.47983	-1.75015	3.16281
1147	-6.47358	-1.8534	3.38436
1148	-6.30841	-1.9646	2.96801
1149	-6.21901	-1.86612	3.57487
1150	-6.46996	-2.02041	2.90392
1151	-6.46139	-2.01743	3.22706
1152	-6.1273	-2.00945	3.96316
1153	-6.16883	-2.0575	3.30425
1154	-5.96913	-2.08095	2.90444
1155	-6.03376	-2.07841	2.83247
1156	-5.94742	-2.09979	3.74697
1157	-6.11114	-2.24804	3.3258
1158	-6.03802	-2.13162	4.07364
1159	-6.17019	-2.28402	3.72969
1160	-6.36549	-2.34851	2.69089
1161	-6.39859	-2.28514	2.79448
1162	-6.18926	-2.14154	3.09625
1163	-5.61188	-2.00677	3.56367
1164	-5.67503	-1.9001	3.37145
1165	-5.52888	-1.81454	3.9697
1166	-5.4603	-1.83267	4.0091
1167	-5.54373	-1.90589	3.49469
1168	-5.40966	-1.80916	4.56112
1169	-5.77361	-1.99996	4.30301
1170	-5.71566	-1.89821	4.03783
1171	-5.5725	-1.99611	3.69097
1172	-5.65951	-2.16687	3.46688
1173	-5.63702	-2.24209	3.83881
1174	-5.74617	-2.27587	3.48045
1175	-5.81757	-2.40868	2.87193
1176	-5.9874	-2.45999	2.76634
1177	-5.98125	-2.4693	3.40146
1178	-6.092	-2.45619	3.74921
1179	-6.28274	-2.36778	3.82722
1180	-6.409	-2.39378	3.74628
1181	-6.37161	-2.50383	3.52196
1182	-6.04611	-2.03149	3.95662
1183	-5.95195	-1.98136	3.31097
1184	-6.23506	-2.02752	3.12745
1185	-5.52826	-1.91015	3.03943
1186	-5.55935	-1.96202	3.09155
1187	-5.6387	-1.88154	3.34421
1188	-5.83748	-1.86438	3.28596
1189	-5.93659	-1.7789	2.99836
1190	-5.96858	-1.85719	3.00884
1191	-6.09597	-1.73033	3.26212
1192	-6.16924	-1.59347	3.34951
1193	-6.35141	-1.65253	3.35717
1194	-6.51825	-1.61251	3.1958
1195	-6.58091	-1.57963	3.06351
1196	-6.22519	-1.5361	2.93113
1197	-6.14646	-1.61923	2.94279
1198	-6.03903	-1.70105	2.9832
1199	-6.12689	-1.80117	2.89376
1200	-6.27904	-1.95723	2.92226
1201	-6.29905	-2.05199	3.04934
1202	-6.84213	-2.15604	2.92116
1203	-6.90284	-2.18172	2.91011
1204	-6.71539	-2.15448	2.88841
1205	-6.7453	-2.05589	2.89421
1206	-6.27442	-1.12521	2.92663
1207	-6.12282	-1.13299	2.97005
1208	-5.77151	-0.906893	2.98999
1209	-5.43809	-0.992577	3.03269
1210	-5.23658	-0.850673	3.07376
1211	-5.73632	-1.61321	3.10997
1212	-6.06747	-1.13901	3.14827
1213	-5.95056	-1.33766	3.18248
1214	-6.00955	-1.34091	2.89813
1215	-5.94316	-1.12418	2.95626
1216	-6.28436	-1.65771	2.78378
1217	-6.28461	-1.6205	2.57165
1218	-6.333	-1.46948	2.66613
1219	-6.92854	-1.51523	2.11892
1220	-6.97156	-1.32548	2.73767
1221	-6.79476	-1.38595	2.5695
1222	-6.77882	-1.38003	2.42518
1223	-6.93473	-1.4205	2.41608
1224	-7.29712	-1.75125	2.52339
1225	-6.94984	-1.45563	2.7233
1226	-7.2283	-1.74003	2.8366
1227	-7.20367	-1.72668	2.91764
1228	-6.93572	-1.5375	2.91862
1229	-6.38463	-1.53268	3.21718
1230	-6.24103	-1.53582	3.59149
1231	-6.19153	-1.57345	3.73505
1232	-6.3356	-1.80733	3.58677
1233	-6.05133	-1.86308	3.84446
1234	-6.06468	-1.97037	3.91269
1235	-6.44822	-2.25332	3.82857
1236	-6.19628	-2.30245	2.76453
1237	-7.01228	-2.52449	2.48167
1238	-6.80975	-2.77315	2.48546
1239	-6.6477	-2.82077	2.66967
1240	-6.75499	-2.92761	2.81183
1241	-6.9859	-3.03164	2.56153
1242	-7.07228	-2.85633	3.19072
1243	-6.69075	-2.22951	3.83935
1244	-5.50122	-1.60329	4.21729
1245	-6.30742	-2.27313	4.17838
1246	-6.6925	-2.28638	4.27003
1247	-6.80861	-3.02732	4.02009
1248	-6.50864	-2.40115	4.23041
1249	-6.44845	-2.94355	4.04029
1250	-6.39394	-1.93114	3.92907
1251	-6.4453	-1.90324	3.87798
1252	-5.85811	-1.67299	3.92665
1253	-6.39097	-1.77112	3.9114
1254	-6.93705	-2.04117	3.76364
1255	-6.7623	-1.98107	3.85804
1256	-6.9664	-1.97539	3.8622
1257	-6.90554	-1.9855	3.86746
1258	-6.70175	-2.01611	3.67104
1259	-6.56384	-2.02702	3.65075
1260	-6.54333	-2.15825	3.5904
1261	-6.93498	-2.37185	3.39028
1262	-6.7427	-2.17739	3.37186
1263	-6.63728	-2.45976	3.37847
1264	-6.49883	-2.58086	3.28369
1265	-6.28529	-2.34696	3.65789
1266	-6.29188	-2.68659	3.89321
1267	-6.88444	-2.638	3.29185
1268	-6.77825	-2.65174	2.9967
1269	-6.34495	-1.94634	3.88231
1270	-6.20681	-2.23384	3.7375
1271	-6.00733	-1.89071	3.85869
1272	-5.91364	-1.8709	3.72609
1273	-5.88628	-1.47521	3.88713
1274	-6.07762	-1.8216	3.9158
1275	-6.19205	-1.79203	3.81323
1276	-5.95905	-1.51496	3.92013
1277	-6.27619	-2.52559	3.78204
1278	-7.13913	-2.56354	3.50791
1279	-7.40004	-2.5076	3.67839
1280	-7.58994	-2.51142	3.44542
1281	-7.58764	-2.29309	3.21867
1282	-7.285	-2.05599	3.46295
1283	-7.34101	-1.79205	3.64397
1284	-6.65913	-1.61727	3.72405
1285	-6.99021	-1.56407	3.69517
1286	-6.75837	-1.72277	3.65584
1287	-6.71945	-1.47589	3.69868
1288	-6.58206	-1.42729	3.57386
1289	-5.9172	-1.35858	3.4491
1290	-5.52589	-1.187	3.57596
1291	-5.31833	-1.04003	3.68719
1292	-6.03092	-1.13031	3.59093
1293	-5.75733	-1.05252	3.49911
1294	-5.17865	-0.795692	3.75407
1295	-6.27831	-0.973174	3.58914
1296	-5.96773	-0.553664	3.92031
1297	-5.2599	-0.574519	3.81233
1298	-5.83037	-0.900712	3.55863
1299	-5.75942	-1.09634	3.10933
1300	-5.77053	-1.07757	3.07792
1301	-6.96805	-1.41024	2.88358
1302	-7.03427	-1.49783	2.84121
1303	-6.68104	-1.39199	2.81722
1304	-5.93194	-1.24301	2.98304
1305	-5.74238	-1.14978	2.95723
1306	-5.49114	-0.876774	3.06962
1307	-5.64212	-1.02082	2.88523
1308	-5.62763	-0.948275	2.90797
1309	-5.61955	-0.805642	2.95334
1310	-5.59005	-0.670203	3.89371
1311	-5.62444	-0.628204	3.76461
1312	-5.7247	-0.603014	3.71843
1313	-5.87189	-0.558666	3.73577
1314	-5.83427	-0.489056	3.54231
1315	-5.60274	-0.350838	3.71262
1316	-5.49306	-0.195067	4.3068
1317	-5.62546	-0.245057	4.25612
1318	-5.15542	0.209101	4.28949
1319	-5.63884	-0.223073	3.91409
1320	-5.01663	-0.0760046	4.07463
1321	-4.78858	0.149989	4.54894
1322	-4.71668	0.189228	4.64164
1323	-5.23941	0.232437	4.4124
1324	-5.6468	0.196146	4.53717
1325	-5.59078	0.0614987	4.37374
1326	-5.37687	0.247612	4.72633
1327	-5.21126	0.430752	4.76244
1328	-5.04364	0.368773	4.86886
1329	-4.87496	0.539962	5.04699
1330	-5.00259	0.663568	5.12504
1331	-5.21186	0.599222	4.69766
