# Supplementary material for: The visual pigment xenopsin is widespread in protostome eyes and impacts the view on eye evolution
Source: eLife. 2020 Sep 3;9:e55193. doi: 10.7554/eLife.55193 (PMC7529461; doi:10.7554/eLife.55193)
Supplement: Figure 5—source data 2. [file elife-55193-fig5-data2.xlsx]

## Sheet: Sheet1
	375-01	375-02	375-03	375-04	375-05	407-01	407-02	407-03	407-04	455-01	455-02	455-03	455-04	455-05	506-01	506-02	506-03	506-04	506-05	506-06	506-07	506-08	513-01	513-02	513-03	513-04	513-05	513-06	513-07	513-08	513-09	513-10	513-11	513-12	513-13	593-01	593-02	593-03	593-04	612-01	612-02	612-03	630-01	630-02	630-03	Dark-01	Dark-02	Dark-03	Dark-04
0	-3.9037	-6.73586	6.04565	-10.6545	6.78618	-10.4819	3.17742	-2.3976	-5.62317	1.32761	5.53523	8.48866	-7.35127	-2.98839	-5.42009	-2.55561	-9.78326	-7.99479	-5.01864	-3.75839	5.95546	-4.38183	5.5817	-10.4209	4.83357	-9.52557	-7.35333	10.2857	8.40401	0.370053	-11.1367	-4.80876	9.24319	-0.891345	8.35726	-6.46852	-7.96587	2.94314	-5.03366	-6.05209	6.30218	-4.86825	-10.7039	6.51918	-7.29065	9.89404	3.12028	0.924755	-6.63554
1	-6.34153	-6.72597	6.15418	-10.6638	6.15787	-10.4749	3.19354	-2.39933	-4.29668	2.74537	5.53954	8.48893	-6.21579	-3.78728	-5.41871	-2.55282	-9.98556	-7.88532	-6.12425	-4.372	5.22946	-4.69147	5.88439	-10.3433	4.83447	-9.52404	-7.35508	10.2063	8.29601	0.30229	-11.6584	-4.75268	9.012	0.0379013	8.33988	-7.62502	-7.98121	3.93707	-4.99337	-6.73187	5.96834	-5.11651	-9.91542	6.52106	-6.82353	9.99949	3.09506	0.334884	-6.79306
2	-5.06335	-5.52865	6.11993	-10.6641	6.17973	-10.4828	3.60735	-2.36877	-8.49929	1.34574	5.48287	8.49146	-7.56845	-4.09408	-5.42168	-2.55747	-9.42051	-7.48684	-6.01778	-3.38658	5.91944	-4.38575	5.8909	-10.1311	4.83735	-9.52502	-7.34741	10.2882	8.50585	0.342723	-11.5739	-4.71568	9.22925	-2.36299	8.41142	-5.47916	-7.95	3.65272	-4.87276	-5.90526	6.28943	-4.89473	-10.7777	7.38562	-6.56204	9.92794	3.06778	0.28996	-6.89554
3	-6.24675	-5.4449	6.22086	-10.6682	6.46727	-10.2803	4.03539	-2.4042	-6.88534	2.71489	5.50113	8.49912	-7.49237	-2.97575	-5.42341	-2.54939	-9.59053	-8.35873	-6.35505	-4.51463	5.87342	-4.5986	5.60452	-9.90248	4.8392	-9.52435	-7.35218	10.281	7.98892	0.241968	-11.1874	-4.992	9.04336	1.44461	8.45102	-7.88932	-7.92083	3.01961	-4.95408	-6.85857	6.27357	-4.83697	-10.0378	6.29964	-6.33554	9.97256	3.18468	0.211204	-6.91695
4	-6.14865	-5.37124	5.92945	-10.6643	6.50304	-10.3334	3.71557	-2.4109	-7.62055	1.29921	5.46478	8.50412	-6.25894	-3.03565	-5.42514	-2.55148	-9.33456	-7.55578	-4.9452	-5.49395	5.24129	-4.38504	5.59132	-9.77132	4.84209	-9.52412	-7.35123	10.2016	8.28352	0.276856	-11.5939	-4.81005	9.26338	-2.60314	8.37148	-6.57411	-7.82482	4.18046	-4.94788	-6.40876	5.89072	-4.78569	-10.8033	7.62173	-6.14932	10.0366	3.14612	-0.0856631	-6.83322
5	-4.21105	-6.81282	6.19632	-10.6524	6.16227	-10.2655	3.63877	-2.37732	-7.41373	0.285091	5.54687	8.51576	-7.4119	-3.7686	-5.42935	-2.55449	-9.21862	-8.36396	-6.23923	-3.90097	5.23595	-4.64511	5.5998	-9.68245	4.8415	-9.52346	-7.35465	10.2811	8.1929	0.316387	-11.6104	-4.74612	8.97198	-1.06874	8.52973	-5.44346	-7.67483	3.03821	-4.55686	-6.78574	6.25782	-4.80936	-10.6405	6.49468	-5.2716	10.0647	2.9529	0.0789774	-6.86213
6	-5.16727	-6.94017	6.19471	-10.6607	6.76292	-10.2976	3.21607	-2.41409	-8.58798	2.64065	5.57314	8.53997	-7.39452	-4.07943	-5.42757	-2.55124	-9.11044	-7.90954	-4.88685	-4.60809	5.23371	-4.39543	5.86124	5.1009	4.84429	-9.51777	-7.33255	10.0471	8.03599	0.353627	-11.3149	-4.84352	9.25459	3.13741	8.50334	-7.18554	-7.5129	3.33197	-4.69965	-6.2256	5.92259	-4.98348	-10.0977	6.95309	-8.17727	10.0913	3.04282	-0.0153365	-6.78555
7	-4.04592	-5.23548	6.17267	-10.6763	6.21675	-10.4186	3.07265	-2.3827	-6.64704	0.308036	5.54657	8.53296	-6.33181	-3.73209	-5.42784	-2.54356	-9.0287	-7.76278	-4.85244	-5.43872	6.00184	-4.38397	5.85238	5.62884	4.84401	-9.51515	-7.33683	10.2063	8.4669	0.374488	-11.5495	-4.75004	8.99169	1.21476	8.52357	-5.74141	-7.33914	3.17717	-5.20962	-6.94058	5.82791	-4.96116	-10.8273	6.54135	-5.25932	10.113	2.97732	0.137802	-6.40602
8	-5.13025	-6.91569	5.62063	-10.6575	6.56506	-10.4724	3.49565	-2.41602	-7.07627	1.41227	5.66963	8.51818	-6.44517	-3.67998	-5.40898	-2.54689	-8.94617	-7.59155	-4.81723	-3.56813	5.22704	-4.57531	5.86913	5.12895	4.84856	-9.49588	-7.37608	10.1419	7.96356	0.186088	-11.597	-4.77187	8.91099	0.994539	8.4855	-5.91641	-7.19299	2.86939	-4.44149	-5.6719	6.23729	-5.00228	-10.6674	6.06267	-7.94672	10.1277	3.0078	0.345016	-6.24124
9	-6.01153	-5.1927	5.60567	-10.6611	6.73439	5.5218	3.99563	-2.38481	-8.03225	0.292679	5.68029	8.50075	-7.65853	-3.15143	-5.41345	-2.54994	-2.33891	-8.09194	-6.45149	-5.28445	5.98324	-4.54475	5.8742	5.26644	4.84768	-9.49847	-7.33946	10.2037	8.37415	0.150564	-11.2506	-4.79158	9.29527	-1.25547	8.51534	-5.43681	-7.09524	3.08501	-5.11555	-5.67783	5.85964	-4.93992	-9.96557	6.49238	-5.28998	9.75102	3.27765	0.558536	-6.08317
10	-4.95565	-5.11339	5.89999	-10.6593	6.16257	5.10529	3.92429	-2.41861	-4.04343	1.47396	5.62985	8.50955	-6.59683	-4.10431	-5.4153	-2.55042	-2.28797	-8.32905	-4.82964	-3.73902	5.36158	-4.41284	5.69246	5.68242	4.85367	-9.47777	-7.34374	10.2327	7.96264	0.141435	-11.6516	-4.81242	9.27689	2.55684	8.49605	-6.31144	-7.0447	3.18748	-5.12158	-5.79513	6.2173	-4.91848	-10.6355	6.85063	-7.7272	9.76182	3.26613	0.762162	-5.96714
11	-5.9054	-6.94019	5.99935	-10.6689	6.83124	5.62384	3.57016	-2.37349	-3.79258	1.37027	5.67202	8.50088	-7.61857	-3.54225	-5.41168	-2.53434	-2.66822	-8.41796	-6.55106	-5.06463	6.01432	-4.51257	5.70604	5.07798	4.85104	-3.00308	-7.34511	10.2025	8.04987	0.117842	-11.6394	-4.80498	8.94248	-0.121874	8.41013	-5.58329	-7.04143	3.61053	-5.20875	-6.79829	6.195	-5.01345	-10.1588	6.78287	-7.51373	9.8141	3.28565	0.291163	-5.8995
12	-5.77369	-6.38718	6.10338	-10.6612	6.26089	5.16231	3.15664	-2.4153	-5.34916	0.484883	5.54926	8.49617	-7.31116	-3.28068	-5.41353	-2.53774	-2.24078	-7.62901	-4.94454	-3.83681	5.40577	-4.50456	5.65908	5.24611	4.85653	-3.00857	-7.34132	10.2085	7.98654	0.110517	-11.6507	-4.82975	8.8434	-1.459	8.43641	-9.2109	-7.10522	3.80394	-5.27686	-5.70512	5.76479	-4.66539	-10.7201	6.5549	-7.0661	9.84852	3.2525	0.360776	-5.90381
13	-4.88491	-6.79818	5.69039	-10.6548	6.16438	5.69216	3.95968	-2.35048	-8.61776	1.56589	5.68037	8.49339	-7.29503	-3.20659	-5.41406	-2.54264	-2.53891	-8.3841	-6.53495	-3.99613	6.015	-4.40634	5.67506	5.23271	4.85479	-3.01174	-7.34248	10.2122	8.19469	0.243533	-11.4073	-4.76853	9.33693	2.74644	8.46148	-5.31903	-7.22485	4.06242	-5.33962	-6.75062	6.14835	-4.68665	-10.5722	6.67026	-5.24217	10	3.26293	0.116858	-5.98479
14	-5.00593	-5.04918	5.81052	-10.6421	6.53157	5.47889	3.17111	-2.4156	-7.74015	0.354822	5.67659	8.60129	-6.56778	-3.52137	-5.41604	-2.54737	-2.75661	-7.64857	-6.54745	-4.20845	5.27377	-4.41315	5.64671	5.05133	4.81552	-3.01059	-7.34212	10.2537	8.1157	0.0993873	-11.5175	-4.74022	9.31802	-0.271204	8.46697	-7.38293	-7.9045	3.48867	-4.97478	-7.06238	5.79195	-5.02563	-10.2571	6.64937	-8.5991	10.025	3.24359	-0.117616	-6.30121
15	-5.64337	-6.50844	5.94604	-10.6601	6.31685	5.26045	3.53331	-2.41041	-5.48523	0.715476	5.67521	8.60454	-7.003	-3.39078	-5.41817	-2.52661	-2.26182	-7.99529	-5.12985	-4.84883	5.30813	-4.41297	5.61808	5.73031	4.85977	-3.02077	-7.3156	10.2952	8.80331	0.181137	-11.0968	-5.05419	8.8735	2.13009	8.39811	-6.12186	-7.93546	3.78338	-4.98236	-6.90077	6.12339	-5.06214	-10.3997	6.78839	-5.36471	10.0756	3.27386	-0.337498	-6.12294
16	-5.51098	-6.41983	5.83711	-10.6465	6.81155	5.79758	3.35486	-2.3258	-6.16321	1.95731	5.52337	8.59507	-7.60327	-3.3773	-5.39425	-2.52144	-2.79237	-7.68043	-5.34971	-3.84164	5.33101	-4.49798	5.62881	5.76944	4.81596	-3.01652	-7.3146	10.1971	8.66424	-0.176103	-11.0317	-5.04293	9.17804	-1.6714	8.44444	-6.80468	-7.31285	2.88165	-5.02484	-7.03552	6.17104	-4.64583	-9.95265	6.48359	-5.33637	10.0661	3.21155	-0.44735	-6.48423
17	-4.66126	-6.21559	5.82895	-10.2731	6.28877	5.84328	3.85896	-2.29332	-7.21954	0.606846	5.51246	8.60078	-6.48664	-3.30761	-5.39125	-2.56316	-2.38832	-7.50885	-5.55329	-4.57686	6.00176	-4.41372	5.76421	5.22803	4.85772	-3.02143	-7.31243	10.2939	8.80034	-0.16856	-11.6147	-4.97189	8.81915	0.782621	8.45211	-8.84096	-7.41433	4.01791	-5.18014	-6.87267	6.07597	-5.03716	-10.7096	6.51203	-8.39717	9.79667	3.3063	-0.410844	-6.6599
18	-5.31321	-5.06637	5.80486	-10.1895	6.59265	5.34211	3.39516	-2.40897	-7.32517	2.11552	5.67452	8.58053	-6.85664	-3.62682	-5.40001	-2.52993	-2.77384	-8.39203	-5.73195	-4.57179	5.48722	-4.49294	5.78605	5.02745	4.81358	-3.01886	-7.3102	10.1929	8.72086	-0.15006	-11.4953	-5.03137	9.21295	-0.418862	8.39611	-5.53479	-7.91891	3.43223	-5.27296	-5.72004	6.10138	-4.62664	-10.4966	6.71506	-5.35099	9.83896	3.30503	-0.260225	-6.79722
19	-4.74527	-6.46513	6.06008	-10.1227	6.34723	5.98802	3.82617	-2.38973	-7.87584	0.862582	5.4802	8.55443	-7.64989	-3.06958	-5.39644	-2.56211	-2.83405	-8.3559	-5.55024	-3.93943	5.51708	-4.45673	5.77868	5.0037	4.85728	-3.0204	-7.30705	10.1982	8.49604	-0.176387	-11.6144	-4.98445	9.3631	2.34336	8.43963	-7.03378	-7.97364	4.10677	-5.34296	-6.98939	6.35916	-5.05142	-10.7611	8.59631	-5.32123	9.8823	3.24192	0.136025	-6.25974
20	-6.50413	-6.62899	6.0026	-10.0728	6.62058	5.39148	3.89071	-2.40635	-5.19074	1.67644	5.67242	8.58965	-6.3807	-3.7286	-5.39928	-2.555	-2.68967	-8.00796	-5.86216	-4.60065	5.4461	-4.46891	5.7314	5.8287	4.82011	-3.02086	-7.32024	10.2928	8.76094	-0.0190839	-11.0619	-5.00694	8.79803	-1.89346	8.39927	-6.90969	-7.95666	2.84528	-5.41384	-6.86216	5.6987	-4.76648	-10.5203	6.84877	-8.79873	9.92409	3.15499	-0.0818511	-6.45037
21	-6.53366	-6.71933	6.10659	-10.0039	6.9288	5.6494	3.43239	-2.41025	-6.40078	0.790487	5.45812	8.56763	-7.65388	-3.57972	-5.39948	-2.56045	-2.71585	-7.75445	-5.36387	-3.75428	5.56942	-4.48448	5.71859	5.21646	4.86344	-3.01956	-7.33055	10.2995	8.5913	0.0606014	-11.6303	-4.975	9.42	0.579462	8.38931	-9.02718	-7.86723	3.92719	-5.38919	-5.69269	6.03477	-5.07342	-10.8035	6.79956	-5.31303	9.95882	3.17088	0.362768	-6.01537
22	-4.82207	-5.9562	5.66644	-9.92461	6.38002	5.14491	3.4746	-2.39207	-3.54807	1.81248	5.66359	8.57216	-6.70757	-3.44338	-5.40168	-2.56024	-2.40266	-7.57922	-5.22146	-4.68761	5.54582	-4.42497	5.75191	5.31931	4.81984	-3.02193	-7.32393	10.1942	8.79172	-0.141884	-11.5926	-4.91376	9.14143	-0.566928	8.43154	-5.50313	-7.98732	3.26791	-5.4133	-6.91918	6.34224	-4.75388	-10.7871	5.79894	-9.45647	10.1468	3.19781	0.519144	-5.98169
23	-5.4021	-6.60723	5.77247	-9.86737	6.67616	5.37653	3.28036	-2.38141	-5.78455	1.05432	5.4351	8.56695	-7.2701	-3.33579	-5.40516	-2.55672	-2.59062	-8.32104	-5.11733	-3.71325	5.25167	-4.41779	5.74176	5.28849	4.81724	-3.02409	-7.32154	10.2361	8.6509	-0.0894273	-11.6208	-4.8541	8.77634	2.95165	8.41499	-8.15473	-7.88631	3.03563	-5.38779	-6.88229	5.67597	-5.09107	-10.543	6.55039	-9.00067	10.1484	3.22193	0.61854	-6.112
24	-6.45797	-5.76405	5.88701	-10.6733	6.86018	5.54566	3.12346	-2.3794	-4.79491	2.57062	5.66954	8.58513	-6.29911	-4.05416	-5.40192	-2.55956	-2.5593	-8.31402	-5.93412	-3.99489	5.64782	-4.41166	5.83704	5.1975	4.82247	-3.01843	-7.31875	10.2048	8.2923	0.236537	-11.6241	-5.0092	9.39123	0.383081	8.39507	-5.45579	-8.00444	3.05345	-4.52101	-7.00348	6.05787	-4.74132	-10.5628	8.36031	-9.22421	10.1521	2.89032	0.72089	-6.02196
25	-5.26146	-4.97185	6.19871	-10.6751	6.70444	5.22673	3.75116	-2.38919	-8.36526	0.951093	5.43085	8.57702	-7.48017	-3.29151	-5.42917	-2.55698	-2.45616	-8.03353	0.745865	-4.64891	5.75803	-4.44277	5.83288	4.96034	4.8252	-3.02834	-7.29468	10.276	8.56766	0.127576	-11.6573	-4.98784	9.16213	-0.726036	8.39218	-6.64478	-7.99632	3.13306	-4.61542	-6.65416	6.33048	-5.09632	-10.8228	8.11459	-5.98738	10.144	2.91491	0.688782	-6.11824
26	-4.3444	-5.6342	6.19423	-9.77513	6.9629	5.49354	3.03091	-2.39009	-8.20206	2.49995	5.41091	8.60463	-6.23932	-3.99005	-5.38236	-2.55841	-2.70402	-7.84663	0.771086	-3.9759	5.23263	-4.41431	5.84757	5.86472	4.82246	-3.02154	-7.29784	10.2015	8.39701	0.167937	-11.4148	-5.08656	8.7499	1.6726	8.37089	-8.40824	-8.01602	4.1447	-4.70463	-7.04351	5.73856	-5.10157	-10.2623	6.54476	-5.81738	10.1383	2.93714	0.733526	-6.40747
27	-5.20288	-4.9988	6.19647	-10.6718	6.40977	5.18018	3.32375	-2.37822	-7.51328	1.25146	5.66987	8.58617	-7.63249	-3.51848	-5.38895	-2.55928	-2.1027	-8.10106	0.792408	-4.635	5.6079	-4.40582	5.80933	5.39896	4.83014	-3.00826	-7.30331	10.2002	8.1074	0.0255688	-5.21561	-5.01803	9.09523	0.207879	8.37593	-5.48912	-8.00899	2.99469	-4.81584	-6.54922	5.99079	-4.73046	-10.8325	6.63698	-9.66278	10.1097	2.86252	0.644205	-6.25968
28	-4.45467	-6.47751	6.18198	-9.67629	6.64758	5.70904	3.67748	-2.39915	-5.96044	2.26617	5.39107	8.60743	-7.14335	-3.87287	-5.38776	-2.5574	-2.81948	-8.37042	0.825405	-4.65176	5.81672	-4.39213	5.79278	5.29242	4.83231	-3.00666	-7.30473	10.0642	8.76956	-0.0898257	-5.25006	-4.96312	9.44747	3.32452	8.38001	-5.52314	-8.0098	2.96767	-4.94408	-7.06562	6.31895	-4.71884	-10.543	7.8646	-5.69875	10.1352	2.83983	0.533095	-6.52413
29	-4.5561	-6.73374	6.22034	-10.6685	6.44241	5.11413	3.79	-2.40737	-4.99662	1.16145	5.66434	8.60758	-6.21022	-3.41439	-5.38397	-2.55989	-2.24227	-8.20886	0.840523	-3.98985	5.70045	-4.39886	5.82351	5.18209	4.82602	-3.00781	-7.30198	10.2015	8.72149	0.0898132	-5.09172	-5.00467	9.11532	-2.12567	8.39768	-8.63409	-7.98332	4.1604	-5.07542	-6.74721	6.0175	-5.10532	-10.4179	6.57417	-5.5798	10.1121	2.78748	0.387044	-6.52285
30	-6.41718	-5.28404	6.21864	-9.52531	6.89268	5.13615	3.24783	-2.41931	-9.46342	2.4078	5.67137	8.59807	-7.5531	-4.05761	-5.38974	-2.55696	-2.88858	-3.04266	0.840079	-4.60529	5.23979	-4.40242	5.81557	4.91803	4.82758	-3.00853	-7.298	10.1446	8.19281	-0.0224991	-5.06842	-4.96757	9.07105	1.90335	8.37804	-6.72026	-8.01607	6.19301	-6.34285	-6.82404	5.71874	-4.70268	-10.812	8.99844	-5.44464	10.1325	2.8098	0.212877	-6.55844
31	-5.1237	0.284402	8.13859	-9.6011	-5.14513	5.85758	4.37406	-7.25509	-9.59515	2.15749	-6.05231	7.34091	6.92808	0.230551	1.12139	-2.2193	-2.01708	-3.12611	0.8376	7.26911	-8.31047	-7.40862	-5.17243	5.48734	-6.92232	-3.01031	-9.93276	9.26113	3.99519	-8.43027	-5.15862	-8.31729	-1.66119	1.53939	-0.800186	2.76286	6.31862	6.26524	-6.49315	-1.4377	-6.42237	2.80719	7.29506	8.62874	-4.32387	-0.912675	-8.32067	0.811428	2.84657
32	-2.05319	0.87081	8.77407	-10.66	-4.17848	5.12558	4.35066	-7.21423	-9.57495	2.15824	-6.12635	7.20157	7.14428	-0.765546	0.966456	-2.2221	-2.89225	-3.22301	0.835495	7.26824	-7.4728	-10.5018	-5.25658	5.28257	-6.63041	-3.00956	-9.08254	8.61331	1.67757	-8.43135	-4.96035	-8.14469	-1.64289	1.49126	-0.798412	2.83592	6.42037	6.16369	-8.95905	-1.31721	-8.00708	3.21401	7.29448	8.80144	-4.71497	-0.923947	-8.36094	0.56312	2.92745
33	-2.05417	0.867097	8.1122	-10.6745	-5.14831	5.88855	4.02195	-7.1541	-9.48273	2.17544	-5.47455	7.09224	7.03044	0.633694	0.842886	-2.23358	-1.99977	-2.93395	0.827217	7.26683	-8.58214	-7.34787	-5.25994	5.16485	-8.06947	-3.00861	-9.13838	9.23696	1.63442	-8.42344	-5.19289	-8.3072	-1.71456	1.16278	-0.796724	2.76747	6.51734	6.77292	-6.65942	-1.52373	-9.07022	3.00837	7.29527	8.78525	-4.85032	-0.940478	-7.89221	0.589028	3.02225
34	-4.84038	0.449705	8.89556	-9.29582	-5.27634	5.19766	4.04826	-7.08216	-9.46367	2.09769	-5.41764	7.02028	7.3412	0.2994	0.754021	-2.13618	-2.05711	-3.12055	0.81903	7.26744	-7.49459	-7.35594	-5.16231	4.93175	-7.77665	-3.00993	-10.0847	8.59483	3.9213	-8.42526	-4.94993	-8.13327	-1.68325	1.12271	-0.799003	2.75139	6.54202	6.29396	-8.81293	-1.4271	-6.41426	3.18095	7.29681	8.94735	-4.92635	-0.942506	-8.12161	0.600787	3.10993
35	-2.06419	0.85376	8.23322	-10.6711	-4.1909	5.94757	4.28863	-7.00091	-9.57949	2.06502	-6.20341	6.97626	6.86505	-0.818093	0.67646	-2.1554	-2.16293	-2.91657	0.615465	7.26952	-8.42092	-10.4216	-5.15271	5.27212	-7.22096	-3.01215	-9.03994	9.31014	3.89423	-8.43453	-4.86673	-8.03863	-1.73578	2.64063	-0.79831	2.85233	6.4898	6.33213	-8.8807	-1.36171	-7.44059	3.53076	7.29778	8.72697	-4.94455	-0.953524	-8.30805	0.654238	2.85722
36	-4.56042	0.397635	8.98029	-9.41086	-5.43651	5.09317	4.09418	-7.70342	-9.60632	2.1295	-6.30393	6.95755	6.97624	0.147172	0.610298	-2.17414	-2.41186	-3.21057	0.800229	7.27046	-8.55851	-10.5305	-5.25694	5.55818	-7.49882	-3.01063	-10.1956	8.91813	1.65057	-8.41751	-4.91443	-8.28619	-1.73075	1.40891	-0.798625	2.75303	6.43458	6.79049	-6.19129	-1.65041	-6.30875	3.49924	7.29641	8.75542	-3.63052	-0.954174	-8.27759	0.616255	2.88447
37	-4.28663	0.33986	8.2133	-10.6505	-4.09743	5.39935	4.09424	-6.93289	-9.58557	2.04122	-5.95885	7.77673	7.18696	0.712016	0.451595	-2.19584	-2.3069	-3.04975	0.635493	7.26917	-7.53873	-7.39761	-5.17936	-1.62655	-8.62293	-3.01169	-10.2541	9.27585	3.98754	-8.42488	-5.03532	-8.15405	-1.64839	1.40691	-0.800551	2.76503	6.38423	6.65525	-8.71514	-1.48857	-8.56806	3.24656	7.29471	8.97491	-4.08143	-0.954238	-7.79559	0.674324	2.79624
38	-3.99672	0.717938	8.25315	-9.12932	-5.58951	5.77004	4.41814	-7.49076	-9.47987	2.05007	-6.39693	7.93614	7.26218	-0.637565	0.564423	-2.00942	-2.29194	-3.13099	0.678671	7.26421	-7.48555	-7.49524	-5.17007	2.49303	-8.33929	-3.00852	-9.33702	8.98315	1.7009	-8.41592	-4.83541	-8.01855	-1.69629	1.22736	-0.799225	2.86576	6.33736	6.29058	-6.24312	-1.449	-8.82652	2.98523	7.29379	8.67141	-4.05883	-0.938495	-8.12099	0.69802	2.63308
39	-3.71746	0.215173	8.45802	-10.6705	-4.15762	5.95739	4.16044	-6.88929	-9.61139	2.08737	-5.37222	8.02272	7.35797	0.770229	2.07618	-2.05652	-2.55949	-3.18601	0.768722	7.26471	-8.5236	-10.3502	-5.18109	0.231097	-7.29422	-3.01061	-10.3441	8.5715	1.39548	-8.28401	-4.48745	-8.16425	-1.35206	1.42911	-0.797681	2.75277	6.23822	6.39697	-8.75262	-1.71983	-6.23372	2.92064	7.29714	8.72308	-4.06916	-0.934633	-7.57671	0.716473	2.55495
40	-3.46054	0.805976	8.61524	-9.20515	-3.97056	4.87272	5.12175	-7.30123	-9.51	2.02514	-5.79144	8.04989	7.07498	-0.714513	1.96741	-2.08705	-6.8323	-3.06268	0.71015	7.26364	-7.88664	-7.64668	-5.24455	2.738	-7.52066	-3.00924	-9.23077	8.54708	1.52688	-8.14872	-4.73294	-8.25437	-1.59918	2.06425	-0.800151	2.80613	6.29709	6.26958	-7.44511	-1.35838	-8.94343	3.56095	7.29498	8.64951	-3.8645	-0.713406	-8.17901	0.742516	2.50514
41	-3.21649	0.762968	8.15692	-10.6493	-5.7182	5.40063	4.17816	-6.8565	2.53723	2.02975	-6.4798	7.88467	7.10783	0.834375	1.88006	-2.11159	-7.20877	-3.14188	0.730028	7.26621	-8.17251	-10.7893	-5.2424	-0.00905204	-7.49355	-3.00971	-9.52258	8.95049	1.00731	-8.37894	-4.67485	-8.12335	-1.34912	1.35318	-0.799361	2.75112	6.49556	6.74518	-7.47308	-1.69414	-8.29785	3.58985	7.29326	8.8255	-4.09596	-0.887571	-8.34511	0.770037	2.47561
42	-2.82932	0.143332	8.31158	-10.4469	-3.86433	5.02798	4.22888	-7.2824	2.15675	2.32399	-5.33788	7.99882	7.01514	0.350598	1.79797	-1.96556	-6.47696	-2.94734	0.633803	7.26538	-8.54241	-7.82116	-5.23688	-2.17727	-7.94357	9.17771	-9.54462	8.52712	1.21194	-8.24323	-4.6204	-8.23425	-1.61173	1.13437	-0.8013	2.79152	6.5984	6.70724	-7.49226	-1.44171	-6.56897	3.31621	7.29658	8.91301	-4.09718	-0.896627	-8.05114	0.551784	2.47835
43	-2.97136	0.943447	8.96009	-10.5936	-5.7432	4.85699	3.93908	-6.86588	2.4436	2.25938	-5.31006	7.70535	7.23611	0.0171153	1.69605	-1.99026	-7.18606	-2.86972	0.682661	7.26575	-7.46226	-10.5889	-5.25774	-2.46152	-8.61867	9.17025	-8.99986	8.49658	0.616187	-8.4299	-4.46292	-8.12603	-1.35534	1.39968	-0.799414	2.94645	6.6049	6.2473	-6.86921	-1.72259	-6.36368	2.96045	7.29017	8.79771	-4.5298	-0.904736	-8.01243	0.53983	2.49322
44	-2.6519	0.669442	8.74958	-10.5125	-4.03856	5.96595	4.45171	-7.31485	2.71644	2.13048	-6.54713	7.51683	7.00253	0.392914	1.58915	-2.03601	-6.30893	-3.08043	0.58476	7.26415	-8.50945	-10.6748	-5.25461	-0.292608	-8.18737	9.17621	-9.63059	8.86599	2.30243	-8.43228	-4.25724	-8.22518	-1.67445	2.29781	-0.799653	2.81267	6.55378	6.81784	-7.09762	-1.59408	-8.66236	3.35018	7.29418	8.60291	-3.4255	-0.583991	-8.22672	0.509619	2.53707
45	-2.48702	0.646267	8.16727	-10.406	-5.55778	5.26593	5.02235	-7.50756	2.10548	2.18863	-5.87129	7.54509	7.35825	-0.0759229	1.46582	-1.90239	-6.98027	-2.96605	0.500567	7.27208	-8.01518	-7.99702	-5.25985	2.97752	-8.3634	9.17893	-9.77605	8.89143	3.18578	-8.17348	-4.30891	-8.12729	-1.35752	1.25583	-0.798877	2.81986	6.47614	6.52638	-7.32736	-1.40882	-8.44597	2.93855	7.29327	8.81373	-4.1121	-0.574034	-8.24761	0.522333	2.60711
46	-2.24223	1.02241	8.86914	-10.3285	-5.67411	5.01026	4.21669	-5.69087	2.63332	2.58476	-6.56767	7.67763	7.49178	0.488772	1.30774	-1.883	-6.66434	-3.16844	0.538834	7.27372	-8.511	-11.0719	-5.2623	-2.72255	-7.89061	9.17567	-9.60599	8.82962	0.793601	-8.42523	-4.34237	-8.22201	-1.60284	1.56149	-0.799934	2.97145	6.80119	6.28372	-7.41275	-1.45274	-9.11437	3.28184	7.29249	8.81899	-4.1678	-0.589033	-7.65268	0.491335	2.68729
47	-2.35348	0.0749692	8.97018	-5.12357	-3.74503	4.85535	4.33822	-7.14936	2.11301	1.28797	-5.70809	7.39139	7.30389	-0.0230352	2.86187	-1.93443	-6.14441	-3.27092	0.462363	7.25855	-7.74319	-11.346	-5.20066	-0.57492	-7.17952	9.17488	-9.566	9.1881	3.33671	-8.42804	-4.25269	-8.21711	-1.35057	1.47175	-0.799034	2.75044	6.4509	6.20644	-8.45957	-1.45774	-6.86351	2.90076	7.29597	8.86682	-3.08243	-0.583168	-7.29	0.477149	2.78088
48	-2.26948	0.872184	8.57852	-6.27679	-5.38775	5.17842	4.18999	-7.00279	2.11	2.48866	-5.29983	7.44954	7.49341	0.437894	2.93772	-2.53096	-7.10005	-2.8644	0.475125	7.26036	-8.60808	-8.17374	-5.21369	3.14608	-7.69545	9.17843	-9.52817	8.79976	2.54649	-8.34957	-4.24573	-8.20202	-1.39586	1.60768	-0.800872	2.7766	6.12143	6.59265	-8.30367	-1.48927	-6.22914	3.03228	7.29135	8.60739	-4.08092	-0.684766	-7.42392	0.516666	2.84414
49	-2.05633	0.108697	8.99367	-6.3796	-5.15804	4.87512	4.2135	-7.22909	2.94243	1.17923	-6.56884	7.37716	7.1167	0.077659	2.56196	-1.92373	-5.92839	-3.09666	0.465647	7.27423	-8.44549	-10.9563	-5.19259	1.37923	-8.06688	9.18181	-9.55083	9.20855	0.439944	-8.37091	-4.23714	-8.10881	-1.40953	1.46356	-0.8003	2.78857	6.31322	6.78828	-7.76533	-1.45306	-8.73736	3.05775	7.29564	8.8604	-3.2368	-0.663267	-7.39146	0.471267	2.87738
50	-2.0431	0.608703	8.4042	-5.15019	-5.21173	4.98999	3.90676	-5.88872	2.2816	2.40216	-5.30002	7.40994	7.33016	0.56075	2.76095	-2.51146	-7.36748	-3.01125	0.517893	7.26058	-8.48867	-8.34769	-5.19311	1.14034	-8.17674	9.1772	-9.59899	8.72627	2.76396	-8.34488	-4.29877	-8.2082	-1.38116	1.80425	-0.799926	2.75002	6.30243	6.38873	-7.93297	-1.52115	-8.39416	3.37368	7.29235	8.83909	-4.06218	-0.637082	-6.98799	0.455604	2.74297
51	-2.14292	0.111684	8.17043	-5.26874	-4.90954	5.10159	4.16735	-7.41095	2.10103	1.38913	-5.61817	7.63636	7.44284	-0.281402	2.46915	-2.45868	-5.67192	-3.25301	0.487218	7.26183	-8.47814	-8.64346	-5.23833	-3.37181	-7.3496	9.18177	-10.5376	9.12534	1.89417	-8.3706	-5.43423	-8.09471	-1.38869	1.65646	-0.803707	2.79258	5.84209	6.29935	-7.53696	-1.46137	-8.85309	3.39747	7.29235	8.84968	-2.99727	-0.618862	-8.21254	0.432877	2.77915
52	-2.05045	0.860191	8.23064	-6.96853	-5.25906	5.8936	4.26101	-6.9066	2.98915	1.58683	-6.61651	7.50089	7.34373	-0.214678	2.65099	-2.49037	-7.3308	-3.15452	0.588196	7.26117	-7.57674	-8.5063	-5.24639	-0.855121	-8.21732	9.1895	-9.39824	9.15362	2.97756	-8.34779	-4.40889	-8.11802	-1.36928	1.61596	-0.796582	2.91321	5.96186	6.15934	-7.50104	-1.22687	-7.15509	3.08986	7.29297	9.07175	-3.13673	-0.593045	-7.87499	0.445961	2.77786
53	-2.05016	1.16135	8.54763	-5.27571	-5.05808	5.94989	4.27378	-7.12672	2.24633	1.49176	-5.67089	8.87786	7.1337	-0.168488	2.22367	-2.43507	-5.38941	-3.25967	0.547348	7.26175	-7.81158	-11.2152	-5.22627	3.3778	-7.71489	9.18614	-9.39173	8.75781	2.08434	-8.35355	-5.64591	-8.21397	-1.3787	2.49517	-0.798912	2.92971	5.7797	6.79756	-8.72627	-1.58088	-6.17418	2.85969	7.29298	9.06625	-4.05846	-0.893702	-7.2074	0.429716	2.84592
54	-5.58059	0.55661	8.37722	-6.32039	-5.3931	4.90787	4.0796	-6.98028	2.11271	1.77557	-6.62727	8.98917	6.97172	-0.126199	2.35751	-2.40336	-7.27614	-2.99183	0.665674	7.27064	-7.51616	-9.36066	-5.23276	-2.949	-8.4262	9.17727	-10.4399	9.07685	1.74025	-8.34173	-4.57123	-8.11179	-1.36138	1.51381	-0.803213	2.80102	6.63778	6.45592	-8.74153	-1.46866	-8.57519	3.12145	7.29472	8.72776	-4.69699	-0.911817	-7.1074	0.420456	2.74308
55	-2.04466	0.0672684	9.00997	-6.88847	-5.53074	4.9329	4.06901	-7.58846	2.35995	1.68468	-5.27882	9.06345	7.17605	0.888977	0.489103	-2.39046	-4.86568	-2.89613	0.626837	7.27185	-7.59129	-8.95373	-5.16908	0.908156	-8.34111	9.17747	-9.50352	8.64562	3.66126	-8.36203	-4.74826	-8.05676	-1.56513	1.54484	-0.799248	2.75058	5.8127	6.1498	-8.74981	-1.28154	-8.53729	3.4191	7.29235	9.06049	-2.98236	-0.924197	-8.06657	0.378963	2.9316
56	-2.05501	0.854292	8.98756	-6.9419	-4.77991	5.85138	4.07045	-6.84358	2.1091	1.93208	-5.22845	8.5999	7.36649	-0.485093	0.515429	-2.3665	-7.24035	-3.10641	-4.13464	7.27099	-8.35346	-8.78056	-5.17582	1.6452	-6.93017	9.17901	-10.6242	9.09707	1.82405	-8.34115	-5.86492	-8.17604	-1.62009	1.17238	-0.803763	2.74881	5.76901	-7.2029	-8.73873	7.14874	-9.1501	2.84461	7.29699	8.78112	-4.94538	-0.927235	-7.46249	0.40763	3.0149
57	-5.46523	0.524989	8.727	-5.46823	-4.61523	4.95853	4.61899	-7.68059	2.33061	1.85589	-5.57864	8.75855	7.01708	1.00575	2.93361	-2.34249	-7.51488	-3.02486	-4.10956	7.27111	-7.64232	-9.58476	-5.16118	-1.14054	-8.73847	9.17658	-9.43297	8.69175	3.78666	-8.36062	-4.93393	-8.18305	-1.51625	1.33352	-0.799217	2.76114	5.94428	-7.20693	-8.68925	7.38686	-7.72602	2.8805	7.29653	8.8586	-3.03625	-0.603264	-6.90521	0.395113	2.93771
58	-2.05647	0.495886	8.33486	-6.40347	-4.31991	5.04959	4.39534	-6.86212	2.80823	2.05644	-5.13106	8.41828	7.22611	-0.420208	3.09317	-2.30562	-5.11363	-3.14509	-4.14028	7.27167	-7.65552	-9.15146	-5.1629	3.6593	-6.83036	9.17743	-10.7364	8.66362	3.43832	-8.31882	-0.666488	-8.10439	-1.45895	1.64325	-0.800172	2.87645	5.89346	-7.21104	-8.58641	7.38601	-6.27771	3.44325	7.29865	9.0155	-4.87976	-0.674503	-7.66031	0.364702	3.01114
59	-5.50945	1.1023	8.88504	-6.97396	-4.23359	5.00546	4.24469	-5.49572	2.27373	1.99644	-5.54855	8.22446	7.37138	0.93265	3.00441	-2.32724	-4.41198	-3.21822	-3.53924	7.27219	-8.62855	-10.022	-5.19128	-3.16847	-8.4767	9.16156	-9.38957	9.01856	1.62784	-8.3566	4.41719	-8.19032	-1.48134	1.52656	-0.807415	2.77513	6.17438	-7.21147	-0.455921	7.44709	-8.61199	2.82312	7.29673	8.82409	-3.28297	-0.633295	-7.14077	0.353192	2.86795
60	-5.34483	0.86467	-1.49412	-6.12423	-4.4429	4.90681	3.9817	-7.65507	2.136	2.13156	-5.59253	7.84011	6.94201	-0.567418	3.04072	-2.28464	-7.50145	-2.88195	-4.2202	7.27126	-7.69449	-9.80441	-5.18139	1.94247	-8.73807	9.1637	-10.6803	9.04675	1.63665	-8.35931	1.42906	-8.08058	-1.42052	2.73911	-0.803812	2.75273	6.28574	-7.20233	-0.300394	7.27072	-9.15052	3.47291	7.29735	9.0399	-4.49968	-0.837989	-7.2941	0.341122	2.71317
61	-2.05809	0.0629767	-1.64439	-5.67252	-4.19589	5.76805	4.82698	-6.76188	2.96932	2.09846	-5.51174	8.02865	6.89615	-0.35988	3.096	-2.25343	-7.46581	-0.472025	-4.34688	7.27131	-8.41416	-0.635741	-5.18496	-1.38148	-7.04306	9.16654	-4.97311	8.62728	3.55851	-8.35398	6.45707	-8.19881	-1.43887	1.34298	-0.79628	2.89275	6.02954	-7.19787	-0.175884	7.14488	-8.49137	3.15125	7.29747	-7.89788	-4.29054	-0.772427	-7.20545	0.32767	2.80086
62	1.01744	7.49239	-1.26268	-5.88164	-8.88555	4.96427	-10.0142	-6.72927	2.15708	2.58774	1.14988	2.93825	6.27785	-6.17175	2.09899	-7.02028	-4.6158	-1.40229	-4.5018	0.55129	5.75438	-0.673104	-5.50864	0.68664	-6.92031	9.16892	-4.97695	4.38444	-8.54488	-8.35139	-0.440054	3.56084	-6.49297	-6.14015	-5.63768	-1.70157	7.19507	-7.20265	-0.257423	7.47375	0.943942	-9.58534	-1.08592	-7.89886	-6.74509	-0.340894	3.87513	-5.60219	-3.23932
63	1.03138	7.70802	-1.46466	-5.31854	-8.85972	5.08347	-9.78945	-6.73206	2.88166	2.5982	1.13329	2.94139	6.31243	-5.98113	1.99444	-7.0115	-7.41699	-1.52098	-4.65605	0.551674	5.68294	-0.64537	-5.50828	3.93057	-8.7355	9.17329	-5.21013	4.40256	-8.52982	-8.33126	3.83912	3.52729	-6.73144	-6.63817	-6.21039	0.0904026	7.18338	-7.20787	-0.298531	7.2735	0.871457	-9.64816	-1.17059	-7.89482	-6.89708	-0.284244	3.89825	-4.76412	-2.74432
64	1.2304	7.24326	-1.34477	-6.10859	-8.49951	4.89913	-10.0218	-7.64745	2.36744	2.5758	1.14411	2.93913	6.26997	-6.60648	1.9051	-7.03377	-4.23745	-0.57497	-4.79544	0.549545	5.67092	-0.605301	-5.59661	0.468467	-7.11537	9.17286	-5.06677	4.37071	-8.52944	-8.36362	1.7042	3.51271	-6.48591	-6.36856	-5.91994	-0.954202	7.16937	-7.19783	-0.421412	7.54291	0.940601	-9.37805	-1.2828	-7.89327	-7.01118	-0.283469	3.49757	-4.7726	-3.40354
65	1.25581	7.51893	-1.60294	-6.15127	-8.79701	5.63657	-10.0182	-7.55276	2.36617	2.58468	1.16	2.94188	6.26716	-5.96561	1.81446	-7.0509	-4.11093	-1.62443	-4.90507	0.552231	5.77525	-0.656663	-5.50785	2.21758	-6.77061	9.1729	-5.18556	4.39389	-8.54225	-8.36395	6.17075	3.42441	-6.70633	-6.56933	-5.1268	-1.713	7.15721	-7.21054	-0.340363	7.58807	0.873357	-9.54793	-1.00101	-7.88772	-7.07405	-0.339229	3.67531	-4.75225	-2.74976
66	1.24307	7.40211	-1.32016	-5.84563	-8.51514	4.88735	-9.86606	-6.58263	2.76558	2.62105	1.14497	2.94123	6.28048	-5.94912	1.75661	-7.04551	-4.0555	-0.680351	-4.97026	0.549016	5.69449	-0.526307	-5.58668	-1.89685	-8.68896	9.17014	-5.02423	4.35848	-8.54705	-8.36242	1.96631	3.47713	-6.50586	-6.38731	-4.89688	-1.07737	7.14731	-7.20049	-0.587009	6.98401	0.952459	-9.0415	-0.998014	-7.90133	-7.06957	-0.289658	3.82259	-4.82634	-3.60969
67	1.03881	7.66229	-1.5157	-6.33572	-8.87597	4.93661	0.181088	-6.76665	2.31489	2.63028	1.13971	2.9388	6.26802	-6.11515	1.8386	-7.05583	-4.04787	-1.69889	-4.99918	0.549467	5.76436	-0.569979	-5.58256	-3.55503	-6.80417	9.17506	-5.17382	4.48654	-8.5266	-8.35925	0.0529211	3.40154	-6.6278	-6.6371	-5.37234	-1.70529	7.13569	-7.20575	-0.70946	7.47681	0.878414	-9.19636	-1.02765	-7.89655	-4.79481	-0.33503	4.15462	-4.74302	-2.78329
68	1.0494	7.58	-1.62581	-6.02254	-8.81701	5.05818	0.201786	-6.42658	2.75973	2.62445	1.15525	2.94118	6.30746	-6.36914	1.73854	-7.07032	-7.54292	-0.792862	-4.52901	0.551292	5.75834	-0.54852	-5.51558	2.40365	2.56015	9.16901	-5.2106	4.50537	-8.54496	-8.34051	4.70857	3.43836	-6.49764	-6.43789	-4.56232	0.315553	7.13143	-7.20266	-0.608258	7.04678	0.945431	-9.48601	-1.81602	-7.88828	-5.99183	-0.288791	3.83386	-4.92433	-2.79469
69	1.06532	7.61055	-1.66252	-5.55961	-8.88085	4.88847	0.230102	-7.42015	2.26405	2.61026	1.13923	2.94023	6.27984	-6.22524	1.75399	-6.96245	-4.04126	-1.01321	-5.01275	0.549786	5.81939	-0.442234	-5.51843	2.3675	2.54294	9.17015	-5.25927	4.46614	-8.53215	-8.19591	2.23513	3.48795	-6.7116	-6.49166	-4.45545	-0.466126	7.12212	-7.21171	-0.513499	7.49863	0.880459	-9.31001	-1.79414	-7.96974	-6.07277	-0.330275	3.81447	-5.05417	-3.81741
70	1.08321	7.41245	-1.16882	-5.84452	-8.86517	5.54062	0.205732	-6.25499	2.76294	2.65459	1.19896	2.93793	6.30211	-6.06996	1.79484	-7.01916	-7.6656	-0.907053	-4.3548	0.553599	5.73589	-0.485762	-5.51486	2.31768	2.53244	9.16646	-5.22424	4.47391	-8.49943	-8.35089	4.12657	3.41679	-6.39358	-6.21282	-4.70975	-1.65745	7.10918	-7.20232	-0.646901	6.98181	0.961496	-9.65946	-1.5643	-7.87618	-4.91484	-0.29339	4.35663	-5.1943	-3.89341
71	1.08738	7.68299	-1.22645	-5.18368	-8.52583	0.310784	0.22334	-6.80941	2.21028	2.66437	1.15794	2.94114	6.27023	-5.9195	1.92005	-7.0449	0.637419	-1.0426	-4.22024	0.555078	5.65907	-0.882679	-5.56076	2.21843	2.50749	9.16674	-5.18174	4.43464	-8.52976	-8.27349	6.72722	3.41432	-6.50591	-6.63505	-4.44302	1.71606	7.09149	-7.20765	-0.703512	7.313	0.888585	-9.60904	-1.42468	-7.95143	-6.20846	-0.335799	3.80019	-5.34808	-2.77819
72	1.09517	7.72167	-1.18422	-6.51433	-8.43102	0.2349	0.248451	-7.27626	-3.59719	2.64512	1.24519	2.93603	6.27318	-6.51069	2.05379	-7.04771	0.642061	-1.27282	-5.00161	0.555589	5.81376	-0.954574	-5.56012	2.58683	2.52052	9.17253	-5.05003	4.44999	-8.52273	-8.33848	-0.202274	3.40794	-6.51985	-6.19266	-4.41126	-0.640968	7.07197	-7.20186	-0.752338	7.21126	0.955675	-9.67137	-1.6913	-7.95959	-4.71465	-0.35476	3.89399	-5.48695	-2.73985
73	1.10865	7.30745	-1.65614	-5.66006	-8.84194	-0.0156291	0.186767	-6.87318	-5.2788	2.67959	1.16109	2.94206	6.26994	-6.04084	2.14345	-6.96551	0.630723	-1.14165	-4.97488	0.556957	5.74558	-0.758602	-5.56595	1.48435	2.50691	-9.43397	-5.10015	4.41362	-8.52786	-8.34154	5.30008	3.47401	-6.24968	-6.17855	-4.81812	-0.291513	7.04907	-7.20942	-0.808535	7.01824	0.890863	-9.39796	-1.77517	-7.88017	-6.57206	-0.294448	3.96958	-4.71096	-2.74117
74	1.10078	7.72158	-1.66258	-6.78021	-8.89455	0.154338	0.206522	-6.07649	-5.76489	2.68012	1.13684	2.94509	6.30102	-5.921	2.1992	-6.95552	0.643579	-1.18162	-4.9295	0.553431	5.73949	-0.855364	-5.56307	2.84895	2.49998	-9.43154	-5.23886	4.42203	-8.51972	-8.04859	2.4991	3.53426	-6.51443	-6.55065	-4.69488	1.90649	7.01383	-7.20403	-0.402886	7.1242	0.899992	-9.13079	-1.78388	-7.90866	-6.38336	-0.351988	3.88616	-4.4756	-2.73226
75	1.11679	7.0204	-1.51729	-5.13432	-8.78063	-0.0678791	0.116662	-6.22156	-5.01291	2.67456	1.31037	2.94169	6.2724	-6.00612	2.23727	-6.98048	0.644899	-0.740626	-4.7828	0.554302	5.64928	-0.86237	-5.57174	2.51775	2.4686	-9.43163	-5.12635	4.53279	-8.55092	-8.33306	0.314517	3.54751	-6.30106	-6.26623	-6.8535	-1.68216	6.99518	-7.2026	-0.496709	6.99826	0.964344	-9.44977	-1.10435	-7.90159	-5.98155	-0.295683	3.87295	-4.60791	-2.76091
76	1.12285	6.50106	-1.2002	-6.65786	-8.74701	0.0657115	0.252237	-6.88618	-3.86678	2.68443	1.13669	2.94091	6.26944	-6.21252	2.23002	-6.92809	0.653378	-1.46798	-4.86798	0.552428	5.79707	-0.711589	-5.56945	2.85883	2.48596	-9.43047	-5.22981	4.2779	-8.55401	-8.35942	-0.868896	3.55163	-6.51051	-6.61992	-4.54911	-0.807314	7.36657	-7.20557	-0.58255	7.61227	0.907803	-8.92724	-1.16281	-7.94399	-5.97119	-0.348909	3.76416	-4.31088	-2.74154
77	1.13777	7.10802	-1.48067	-5.47172	-8.47404	-0.0596419	0.06562	-6.48638	-2.03491	2.6819	1.1651	2.94345	6.29536	-6.02396	2.18438	-6.90471	0.645246	-0.704401	-4.53681	0.54152	5.74589	-0.807684	-5.5843	1.41239	2.43986	-9.11728	-5.25739	4.52316	-8.52392	-8.10997	5.00602	3.47887	-6.52282	-6.05303	-5.09949	-0.113294	6.98698	-7.20433	-0.940636	7.05257	0.911311	-8.99967	-1.66729	-7.91996	-6.11106	-0.298719	4.16809	-3.90578	-2.71572
78	1.12594	6.54396	-1.60847	-4.02829	-8.63123	-0.07237	0.0284387	-6.36088	-4.80582	2.67971	1.37773	2.94018	6.28837	-6.05556	1.81314	-6.95058	0.685935	-1.58544	-4.67429	0.562725	5.73938	-0.671148	-5.57944	2.48492	2.44952	-9.26256	-5.31864	4.26656	-8.54873	-8.36488	2.76067	3.47846	-6.18814	-6.26359	-7.18737	-1.16455	7.38771	-7.20979	-0.951467	6.971	0.901821	-9.43984	-1.74483	-7.89227	-5.73067	-0.346564	3.78094	-3.69293	-3.09691
79	1.13409	7.69116	-1.16266	-2.8729	-8.73621	0.0118936	0.155958	-6.20397	-5.27326	2.57211	1.13729	2.94266	6.26538	-6.26337	1.91597	-7.19229	0.486993	-0.903128	-4.38129	0.544446	5.79695	-0.669654	-5.54753	1.40149	2.42778	-9.43121	-5.38946	4.55501	-8.54669	0.806847	0.581722	3.39876	-6.52877	-6.59526	-7.04931	1.06184	7.34306	-7.20131	-0.95186	7.03802	0.924232	-8.98398	-1.667	-7.93141	-6.01339	-0.300419	4.14289	-4.118	-2.69461
80	1.16658	6.48596	-1.58043	-3.39387	-8.88183	0.125894	0.271299	-6.26367	-5.21017	2.68081	1.1437	2.94046	6.29126	-5.98884	1.68852	-6.91804	0.458784	-0.812171	-3.99715	0.544486	5.64198	-1.76661	-5.55039	2.88563	2.44073	-9.22985	-5.45287	4.25705	-8.52117	0.837641	-1.07571	3.39782	-6.20515	-6.14257	-5.00654	-1.53356	7.35525	-7.19829	-0.917423	7.58716	0.919636	-9.40733	-1.31612	-7.8965	-5.48934	-0.314192	3.79104	-3.49949	-2.84379
81	1.17742	7.16256	-1.54386	-2.72399	-8.39293	0.282127	0.127171	-6.1151	-5.52272	2.60477	1.16777	2.93938	6.33964	-5.77969	1.58612	-7.21771	0.732341	-1.32903	-4.18656	0.562191	5.72007	-1.94006	-5.5398	2.44048	2.37166	-9.39032	-5.30134	4.54262	-8.55096	0.823993	5.88812	3.43301	-6.64237	-6.16004	-4.91257	-1.43031	6.97675	-7.20234	-0.941725	7.05628	0.846713	-9.29834	-1.23333	-7.86781	-6.26367	-0.308649	3.73554	-3.35449	-2.71759
82	1.15107	7.69388	-1.55316	-3.43502	-8.87686	0.0730467	0.243571	-6.93469	-5.30603	2.55067	1.46775	2.9437	6.33133	-5.78156	1.49581	-7.21847	0.520482	-0.402651	-3.70458	0.559192	5.75675	-1.85156	-5.54059	1.41842	2.35782	-9.43588	-5.3464	4.25141	-8.54449	0.86104	3.02423	3.51597	-6.527	-6.60296	-7.26172	1.29504	7.33311	-7.20796	-0.886997	7.61039	0.933882	-8.91235	-1.55014	-7.87202	-5.07947	-0.310321	3.98866	-3.25567	-2.79583
83	1.2348	7.78399	-1.15738	-3.31899	-8.64936	0.126525	0.0818597	-6.59511	-3.05183	2.51002	1.13704	2.94311	6.27317	-5.79375	1.5141	-7.23087	0.749044	-0.360395	-3.83397	0.559425	5.73705	-1.99375	-5.56019	2.66617	2.70895	-9.10747	-5.33573	4.24723	-8.55168	0.783468	-1.23739	3.55421	-6.53732	-6.29733	-7.19405	-1.6092	7.3127	-7.20819	-0.846639	7.00141	0.98065	-8.9588	-1.78909	-7.87643	-6.35282	-0.303718	3.88579	-3.27505	-2.94724
84	1.21605	7.10939	-1.37984	-3.02463	-8.87999	0.304513	0.0707059	-6.20057	-1.44402	2.52915	1.16875	2.93975	6.29575	-5.82078	1.65655	-7.1954	0.561865	-0.668873	-3.61105	0.557871	5.81569	-1.93174	-5.54625	1.87122	2.72985	-9.43467	-5.29437	4.23763	-8.54798	0.788129	3.28634	3.53646	-6.34963	-6.59575	-7.29755	-1.3024	7.37659	-7.20839	-0.653087	7.56325	0.849999	-9.40569	-1.42635	-7.99259	-5.26852	-0.357911	4.10097	-3.28894	-2.79518
85	0.99748	6.70778	-1.42341	-3.36624	-8.8765	0.335142	0.242038	-6.87353	-3.32532	2.51393	1.13858	2.94234	6.32837	-6.21738	1.54275	-7.18038	0.773875	-1.73348	-3.51904	0.557126	5.64601	-1.83124	-5.55263	2.70034	2.39178	-9.13264	-5.24368	4.34986	-8.54394	0.794782	0.862292	3.47675	-6.57799	-6.33471	-5.30621	1.50547	7.32158	-7.20983	-0.720609	7.03421	0.932152	-9.10286	-1.74191	-8.00454	-6.36792	-0.302044	3.69498	-3.36828	-2.67633
86	1.19673	7.05341	-1.53846	-3.36797	-8.29559	0.133351	0.260581	-6.06491	-1.82898	2.50572	1.56217	2.93969	6.26574	-5.89634	2.04358	-7.11874	0.607815	-0.361735	-3.54329	0.549018	5.70764	-1.68002	-5.52894	1.80459	2.35453	-9.29996	-5.76394	4.3414	-8.54736	0.85348	5.5997	3.46835	-6.54507	-6.18227	-7.29554	0.569603	7.28889	-7.20328	-0.792075	7.44212	0.983576	-8.96956	-1.16521	-7.99753	-6.86503	-0.330328	3.60297	-3.55168	-2.74894
87	1.26091	7.08536	-1.52508	-2.38122	-8.60208	-0.0550044	0.0612677	-6.68037	-5.70903	2.55721	1.17405	2.94344	6.28128	-5.94466	2.06327	-7.08884	0.832456	-0.656213	-4.03922	0.551467	5.75898	-1.50588	-5.53157	1.70951	2.35825	-9.42171	-5.72615	4.32027	-8.5475	1.04255	3.55965	3.45691	-6.24745	-6.62397	-5.19866	-1.18924	7.30084	-9.56791	-0.854227	-7.36239	0.856677	-9.26347	-1.26712	-7.88351	-6.36229	-0.274313	3.416	-3.46041	-2.79784
88	0.934526	6.54783	-1.33032	-3.05141	-8.87598	0.12798	0.260645	-6.77174	-1.63024	2.53509	1.17416	2.9405	6.31963	-5.88517	1.92823	-7.05285	0.330139	-1.72615	-4.03481	0.549521	5.75304	-1.31161	-5.52194	2.74993	2.65059	-9.43173	-5.58312	4.33016	-8.54072	0.886236	1.14215	3.55894	-6.4758	-6.15466	-6.76908	-1.66413	7.28307	-8.3954	-0.895455	-7.5352	0.968821	-9.05414	-1.02594	-7.88692	-7.00334	-0.322833	3.64075	-3.53162	-2.69684
89	1.25691	7.78165	-1.25704	-3.15048	-8.6968	0.0460372	0.0642782	-5.99824	-2.78725	2.57182	1.66996	2.9422	6.28597	-5.84564	1.99773	-7.0732	0.796262	-0.397449	-4.03718	0.54685	5.77809	-1.10774	-5.52637	1.59547	2.35933	-9.41643	-5.51533	4.29398	-8.53233	1.08403	1.10723	3.5475	-6.54873	-6.63616	-5.55046	0.822129	7.23315	-8.40859	-0.925076	-7.43825	0.939055	-9.51393	-1.07893	-7.97935	-6.29373	-0.279504	3.38196	-3.51768	-2.7138
90	1.01156	6.65381	-1.43734	-3.3736	-8.55065	-0.00680669	0.155726	-6.20963	-4.35848	2.56875	1.1555	2.94036	6.26999	-5.87597	2.04144	-7.09642	0.370331	-1.67642	-4.05988	0.54632	5.70213	-0.406063	-5.53103	2.8173	2.68481	-9.43569	-5.64789	4.31083	-8.54875	0.916753	1.22285	3.55257	-6.4882	-6.29111	-7.00285	-1.43243	7.26856	-9.59162	-8.07969	-7.16203	0.863834	-9.17552	-1.4687	-7.98652	-6.69181	-0.324344	3.5824	-3.4211	-2.77272
91	1.08873	7.73912	-6.09884	-3.41916	-8.29211	-0.0509439	-0.0258819	-6.86346	-5.39646	2.56639	1.14744	2.94198	6.31526	-6.07275	1.99177	-7.0389	0.882628	-0.688069	-4.09222	0.548078	5.64495	-0.377075	-5.53375	2.54495	2.66192	-9.43501	-5.69614	4.30178	-8.53842	0.928267	1.11992	3.39531	-6.47025	-6.13916	-6.49529	-1.55837	7.21021	-9.2052	-7.3237	-7.29209	0.93318	-9.30486	-1.57592	-7.89552	-6.23808	-0.279397	4.01682	-3.26895	-2.75019
92	1.2471	6.88242	-5.28179	-3.08489	-8.87375	0.0253833	0.127822	-5.86779	-5.62078	2.57155	1.14592	2.93954	6.26465	-4.54868	1.9656	-7.03933	0.40635	4.9686	-4.12523	0.547669	5.74555	1.07551	-5.53086	2.12052	2.60285	-9.40826	2.92802	4.28763	-8.54607	0.939306	1.21783	3.55137	-6.47258	-6.58888	-5.42062	-1.31336	7.25309	-8.32145	-7.35058	2.69642	0.977155	-9.57546	-1.36737	6.36422	-6.47412	-0.316371	3.81567	-3.07217	3.59335
93	-9.61794	5.05387	-5.41905	-2.53143	-8.91416	-0.0684257	0.258801	-6.18058	-5.55838	1.90015	0.406852	-5.73304	-7.38655	-4.24498	4.29421	1.2506	0.865826	5.39323	-4.16762	-2.56168	-8.35838	1.20183	1.4983	2.59123	2.58611	-9.4227	2.90125	0.987716	-6.11173	0.98304	1.09951	0.272196	-6.40052	-2.81138	-8.52853	-3.85633	1.29907	-9.20951	-8.03434	2.25023	-3.96826	7.27157	-6.31591	5.74541	-6.55042	5.42492	-3.35537	-9.16609	3.59784
94	-9.86169	3.44413	-5.25644	-3.59343	-9.03519	-0.098984	0.266383	-6.93936	-1.24294	1.86962	0.00241367	-5.91448	-7.24136	-3.77396	4.30134	1.20662	0.439733	4.96027	-4.27427	-2.5283	-7.61808	1.11942	1.56746	2.00198	2.61533	-9.41778	2.77163	0.881503	-6.2237	0.987922	1.20549	0.360982	-6.3272	-2.90488	-7.22453	-4.09386	1.19293	-9.40811	-7.38302	2.87428	-3.97058	7.31618	-7.71393	6.42825	-6.56498	5.46372	-3.37712	-8.548	3.6035
95	-9.8506	3.99599	-6.07884	-3.38709	-9.03964	0.197431	0.0654742	-5.73408	-4.58621	1.91567	0.0969816	-5.71061	-6.90071	-4.34667	4.33316	1.15029	0.90304	5.29443	-4.40291	-2.48838	-7.88693	1.04052	1.55956	2.59614	2.63217	-9.3755	2.87622	1.13174	-6.15265	1.17018	1.1127	0.487667	-6.47181	-2.64156	-8.56233	-3.67991	1.209	-8.38835	-8.51919	2.38345	-4.03243	7.39717	-7.61759	5.80921	-6.58027	5.4425	-3.07734	-8.59479	3.60691
96	-9.84921	4.92169	-5.76499	-3.32171	-9.03928	-0.101277	0.275326	-6.96318	-2.28235	1.8784	0.02422	-5.92104	-7.41354	-4.81213	4.37651	1.44193	0.919791	5.14186	-3.99524	-2.4479	-8.19133	1.17182	1.50607	1.92309	2.5517	-9.38938	2.82241	0.7237	-6.26385	1.19117	1.2141	0.638217	-6.60713	-1.85386	-8.5426	-4.10837	1.16996	-8.34891	-7.98576	2.66318	-4.02246	7.35351	-7.43476	4.82282	-6.54962	5.44858	-3.2056	-8.63583	3.51511
97	-9.60836	5.07936	-5.22775	-3.73923	-9.03772	-0.1076	0.0930425	-6.25594	-5.32766	1.78364	-0.027991	-5.94394	-7.01657	-4.45265	4.43036	1.40366	0.952172	5.02379	-4.50574	-2.75489	-7.72303	1.01557	1.56426	2.63067	2.5689	-9.416	2.1437	0.796538	-6.45705	1.10343	1.08836	0.585586	-6.53338	-3.13274	-7.48319	-3.66016	1.09501	-8.41301	-7.42743	2.2684	-4.05734	7.38408	-7.74927	6.2982	-6.49477	5.47193	-3.30032	-8.7585	3.51613
98	-9.8488	3.83405	-5.59235	-3.21239	-9.08421	-0.0946024	-3.25934	-6.29216	-5.69508	1.66319	0.139021	-5.75818	-7.34356	-3.71361	4.47983	1.36126	0.980091	5.14712	-4.58154	-2.68604	-8.25697	1.00065	1.56288	1.84574	2.56228	-9.42003	2.14646	2.11552	-6.10257	1.13583	1.19529	0.440604	-6.70784	-1.12458	-9.45858	-3.8819	0.713936	-9.07803	-7.89856	2.61336	-3.84412	7.03283	-6.45355	5.6168	-5.73627	5.48206	-3.41302	-8.67351	3.52426
99	-9.85109	5.27899	-5.6044	-3.30922	-9.04809	-0.0094686	-2.69931	-5.59842	-5.75893	1.70402	0.436981	-5.95063	-7.4457	-4.30047	4.44408	1.30282	0.312595	5.31866	-4.00806	-2.63457	-8.55448	1.02634	1.50505	-3.33489	8.446	-9.41937	2.18146	2.21389	-6.09818	1.17574	1.09263	0.329213	-6.67084	-2.84735	-7.68175	-4.12254	0.950453	-9.13636	-8.44508	2.56221	-4.03291	6.99838	-8.08693	4.83663	-6.47697	5.49335	-3.42578	-8.80482	3.54232
100	-9.86345	4.9743	-5.38718	-3.39043	-9.08433	-0.102973	-3.16529	-6.96877	-4.12338	1.8354	0.278284	-5.74307	-6.80486	-3.6534	4.49749	1.55354	1.01285	5.29335	-4.62623	-2.59805	-7.30206	0.981211	1.50528	-1.79903	8.44212	-9.42771	2.28633	1.82107	-6.10202	1.12957	1.18865	0.284591	-6.74101	-2.70222	-9.50214	-3.77664	0.715505	-9.18643	-7.94367	3.27452	-3.90697	7.14308	-6.34897	4.85104	-6.50361	5.50134	-3.38398	-8.87676	3.53299
101	-9.86467	3.28393	-5.27768	-3.82849	-9.05335	-0.0869347	-2.871	-5.47214	-2.53121	1.63196	0.632926	-5.80227	-7.04561	-4.37027	4.3675	1.51293	0.297114	5.41164	-4.01724	-2.26458	-7.52872	0.988872	1.50052	-3.18544	8.43995	-9.41972	2.18818	1.97914	-6.43152	1.20122	1.07474	0.990876	-6.31511	-1.75202	-8.43807	-3.80583	1.18499	-8.45564	-7.85959	3.22515	-3.75405	7.09457	-7.8045	6.20837	-5.75149	5.51427	-3.39083	-8.99643	3.53664
102	-9.85575	4.15094	-5.17776	-3.19947	-9.16052	-0.685369	-2.70003	-6.28168	-5.41647	1.62926	0.627721	-6.01615	-7.13219	-4.20364	4.4201	1.48499	0.281035	5.43292	-4.63744	-2.2307	-8.48139	1.38568	1.5029	-4.7501	8.44583	-9.42533	2.42384	1.53514	-6.09933	0.802378	1.1824	0.942163	-6.73928	-2.60745	-6.37509	-3.45311	1.13577	-9.41117	-8.4866	3.09265	-3.97889	7.21773	-7.40762	6.12291	-6.51809	5.67436	-3.4013	-9.14352	3.52836
103	-9.85729	5.17397	-5.31997	-3.29969	-9.03273	-2.024	-3.11614	-6.28014	-5.05431	1.62936	0.566424	-5.77341	-6.83193	-4.7606	4.47011	1.46846	-0.502179	5.3802	-4.0332	-2.19165	-7.02709	1.40368	1.54619	-3.49651	8.44339	-9.39572	2.52891	1.66998	-6.44622	0.860159	1.08476	0.849715	-6.4069	-2.70697	-8.37217	-3.74677	1.14938	-9.24169	-7.2793	2.54783	-3.78847	7.60871	-7.27491	4.67313	-5.71663	5.3946	-2.24461	-9.16459	3.5329
104	-9.84396	5.24201	-6.08229	-3.90336	-9.06023	-3.85026	-2.70331	-6.96359	-5.41999	1.61107	0.547354	-6.03294	-7.4773	-4.32252	4.49336	1.55265	-0.235092	5.44473	-4.54975	-2.40659	-8.01229	1.27345	1.54304	-1.58856	8.44077	7.05644	2.64827	1.28554	-6.10076	0.788417	1.17402	0.716216	-6.71957	-2.85081	-9.47716	-4.06358	0.805956	-8.6192	-7.81071	3.23899	-3.90447	6.87956	-7.39115	4.68978	-6.53763	5.40212	-2.28033	-8.43747	3.53162
105	-9.83285	4.98925	-5.26551	-3.34099	-8.69124	-2.16953	-3.45189	-5.39164	-5.3975	1.52432	0.2524	-6.05476	-7.39709	-4.11844	4.48121	1.55258	-0.991889	4.9399	-4.61624	-2.33833	-7.22723	1.32841	1.55088	-5.1874	8.4364	7.06991	2.249	1.41442	-6.09618	0.83015	1.16513	0.791205	-6.48014	-1.64372	-6.66854	-3.41946	1.22831	-8.91046	-8.40662	2.35238	-3.76352	6.93009	-6.59241	6.24602	-6.53384	5.42126	-2.30171	-8.48889	3.53405
106	-9.67103	3.55689	-6.08764	-3.97033	-9.10665	-3.61119	-2.74532	-7.38835	-5.51894	1.47353	0.412171	-5.81915	-7.26847	-3.57126	4.44106	1.54448	0.0242757	5.27196	-4.44482	-2.37625	-7.41692	1.36875	1.54688	-5.4017	8.4402	7.07488	2.33231	2.44901	-6.10145	0.945612	1.05739	0.915773	-6.77561	-2.67799	-8.48628	-4.07918	1.09647	-9.12446	-7.30483	2.83537	-3.74389	6.83621	-7.10174	6.17505	-6.44463	5.63979	-2.24135	-8.37614	3.53492
107	-9.79074	5.1605	-5.48611	-3.33733	-9.18369	-0.750625	-2.81256	-7.31284	-5.27219	1.58966	0.249658	-5.78706	-7.11021	-4.78567	4.38137	1.58956	-1.23826	4.84262	-4.47392	-2.30355	-8.10604	1.26163	1.55352	-3.67363	8.43496	7.04739	2.95565	0.866324	-6.09739	1.05904	1.16902	0.981564	-6.51118	-2.77717	-9.51108	-3.83719	0.675078	-8.48153	-7.63666	2.69651	-3.83916	7.62196	-6.92803	5.89978	-6.07163	5.63452	-2.27747	-8.3128	3.53107
108	-9.71171	2.97879	-5.74432	-3.1121	-9.0474	-4.94682	-2.73624	-7.23724	-5.43285	1.49498	0.508169	-5.69878	-7.4211	-4.77033	4.32841	1.57903	-0.736505	5.13937	-4.53912	-2.91707	-7.80694	1.30044	1.55326	-1.36512	8.43587	-2.79479	2.92779	2.31067	-6.19905	0.896256	1.06741	0.642501	-6.48844	-2.90611	-6.95862	-3.70776	1.20883	-9.08737	-8.36808	2.88662	-3.79186	7.64617	-7.5721	4.74279	-6.40575	5.62086	-2.77494	-8.26856	3.53163
109	-9.62441	3.68112	-5.2822	-6.14034	-8.80161	-2.32926	-2.69995	-7.15072	-4.9	2.11314	0.549699	-5.82505	-7.30381	-4.03734	4.47914	1.55433	-1.52154	5.20653	-4.77145	-2.99054	-7.95783	1.22102	1.55713	-3.87501	8.4345	-2.76431	2.82758	0.952349	-6.27224	1.00408	1.15427	0.503206	-5.93081	-1.51161	-8.16589	-4.05722	0.571686	-8.46321	-7.68636	2.63122	-3.77409	6.78353	-7.42072	4.78777	-6.01073	5.62504	-2.93448	-8.22238	3.531
110	-9.60568	5.24122	-6.03394	-5.44764	-9.13726	-1.19212	-3.34993	-1.46121	-6.86214	1.35766	0.105234	-5.70224	-7.45006	-3.44252	4.49558	1.29554	1.23912	5.34915	-4.67049	-2.95432	-7.12142	1.24637	1.53404	-5.59226	8.43516	-2.82556	2.67676	2.73435	-6.30285	-0.668675	1.14867	0.530061	-5.94501	-2.53119	-8.95863	-3.99883	0.506427	-8.6695	-8.32677	2.43506	-3.83005	7.60474	-6.76183	6.05605	-6.42218	5.6653	-2.47792	-8.15878	3.53378
111	-9.64601	4.71426	-5.25748	-5.08021	-8.63136	-3.38792	-2.7642	0.325139	-5.41737	2.053	0.498067	-5.8414	-7.14069	-4.33703	4.31077	1.57475	-1.81995	5.38382	-4.86534	-2.02938	1.52233	1.57818	1.53388	-1.31068	8.43214	-2.72587	2.42108	1.02071	-6.22431	-0.898858	1.04828	0.394466	-5.93942	-2.57208	-5.78133	-4.16414	1.09621	-8.37755	-7.73096	2.89438	-3.78575	7.56184	-7.50634	5.97663	-6.38672	5.65811	-2.61848	-8.09228	3.53475
112	-9.58574	4.3079	-5.96668	-6.15094	-8.70328	-0.871597	-3.32256	-1.40586	-5.007	1.42254	0.00496539	-5.67211	-7.24433	-4.71104	4.43299	1.26645	1.01491	5.06878	-4.83486	-2.05302	1.67252	1.53707	1.53065	-2.59072	8.43254	-2.91861	2.54436	2.59793	-6.24569	-0.771651	1.14518	0.394259	-6.04136	-2.34201	-9.48825	-3.5488	1.07949	-9.11696	-8.28402	2.48647	-3.95792	6.80672	-7.53118	4.83906	-5.92462	5.65545	-2.3653	-8.00051	3.57888
113	-9.58144	5.01316	-5.90971	-5.53728	-8.99401	-2.58409	-2.73055	-1.75493	-4.89449	2.14048	-0.0269247	-5.85322	-7.05489	-3.87623	4.2801	1.25008	-2.08527	5.14593	-4.88983	-2.08046	1.23526	1.54993	1.53168	-2.78954	8.45829	-2.8632	2.66664	1.10962	-6.13794	-1.02697	1.2258	0.336271	-5.97497	-1.38592	-8.27623	-3.51711	0.486726	-9.55252	-8.23843	2.50886	-3.95893	7.44188	-8.54154	4.99711	-5.79575	5.64853	-2.35037	-8.04404	3.58526
114	-9.8635	5.26799	-5.20197	-5.00091	-9.177	-1.02374	-2.70235	-1.21167	-5.33868	2.06524	0.373885	-5.68627	-7.54582	-3.21065	4.36918	1.26897	0.788907	4.99233	-4.89726	-2.10339	2.01098	1.53251	1.53873	-4.08127	8.43048	-3.00096	2.78828	1.23514	-6.2641	-0.683939	1.14504	0.346167	-6.2193	-2.59405	-9.17684	-4.02601	0.500718	-8.98626	-7.76978	3.05211	-3.75152	6.73486	-7.59401	6.85448	-5.84375	5.64612	-2.58923	-7.97111	3.56572
115	-9.85803	3.63364	-5.87571	-6.02584	-8.63928	-3.18905	-2.87636	0.423144	-5.37746	2.1244	0.21405	-5.8668	-7.28857	-4.39296	4.32519	1.23618	-2.29216	4.97395	-4.8986	-2.12774	1.77865	1.53232	1.54129	-1.20595	8.46134	-2.9474	2.9003	2.83387	-6.16876	-0.623571	1.23522	0.425717	-6.13287	-2.97595	-6.07251	-4.12254	1.21648	-9.25896	-8.19824	2.7922	-3.8923	6.75827	-8.59848	4.72781	-6.3396	5.55422	-2.47454	-7.94163	3.57292
116	-9.58941	4.77041	-5.98729	-6.10703	-9.18218	-4.86454	-2.67724	-0.981297	-6.34091	1.92183	0.00950331	-5.87425	-7.34959	-4.63326	4.284	1.21296	0.537974	4.9058	-4.8634	-2.16026	2.46281	1.53289	1.53529	-5.78077	8.4277	-2.96946	2.14066	1.36575	-6.1064	-0.620466	1.14113	0.561072	-6.25346	-1.27573	-7.85359	-3.48575	1.11836	-8.32981	-7.47768	2.98444	-4.02921	7.47403	-7.45568	5.34875	-6.35437	5.56223	-2.71528	-7.88896	3.55672
117	-9.85764	5.27511	-5.20503	-5.36104	-8.94425	-3.01928	-2.71747	-1.65957	-5.27379	1.96132	0.0637025	-5.61719	-7.53201	-3.9492	4.38633	1.19016	-2.34178	5.26058	-4.88943	-2.78268	2.11868	1.53121	1.51666	-2.3778	8.43117	-3.05236	2.21488	0.66069	-6.39126	-1.41287	1.23734	0.890666	-6.2752	-2.16333	-8.6649	-3.62506	0.550691	-8.81462	-8.15985	3.01041	-3.76467	6.7603	-7.91812	4.86566	-6.35503	5.54127	-2.40029	-7.78382	3.56219
118	-9.60276	4.48891	-6.08497	-5.60416	-8.99321	-4.78525	-2.81842	-1.44363	-5.16502	2.0024	0.0748416	-5.89386	-7.24765	-3.30757	4.30646	1.14713	2.45562	5.12801	-2.24375	-2.80649	1.88523	1.52018	1.50925	-5.97855	8.45523	-3.04096	2.22156	0.614869	-6.41076	-1.1433	1.13329	0.878459	-6.20972	-2.91091	-5.21591	-3.90246	1.33681	-8.76397	-7.5285	2.82282	-4.02041	7.52082	-7.81813	6.59155	-6.34345	5.53021	-3.46708	-7.8535	3.55154
119	-9.59218	4.89317	-5.23328	-6.29203	-8.9642	-1.36125	-2.75627	-1.53723	-6.22103	1.97082	-0.0447121	-5.66398	-7.16097	-4.38187	4.4842	1.13353	-2.37897	4.86951	-7.46042	-2.72285	1.36809	1.48244	1.51454	-4.30634	8.43047	-3.08908	2.50732	0.624531	-6.125	-1.08053	1.1274	0.722838	-6.23838	-2.57093	-8.77811	-4.14344	0.605451	-8.769	-7.57688	3.10781	-3.80991	7.55137	-8.24727	5.51519	-6.42835	5.51897	-3.44303	-7.81685	3.55008
120	-9.58457	4.96889	-6.0302	-5.03939	-9.18105	-2.88402	-3.01813	-0.72286	-5.18942	2.05396	-0.0976016	-5.87893	-7.38307	-3.82379	4.38516	1.11715	-2.41628	4.90963	-2.38805	-2.86061	2.29311	1.44349	1.52734	-1.06712	8.45618	-3.06829	2.34981	0.688592	-6.34644	-1.23456	-4.41863	0.825291	-6.11629	-2.91221	-8.58424	-3.96321	1.34199	-7.85579	-8.11904	3.05202	-3.80638	6.72724	-7.81927	6.50212	-6.33369	5.60641	-3.52792	-7.75094	3.54626
121	-9.85521	3.7599	-2.68059	-4.99171	-9.01892	-4.67598	-3.41856	-1.48946	-5.09291	2.02166	0.181802	-5.6539	-7.21997	-4.75153	4.34467	1.1363	2.22841	5.00553	-2.49505	-2.89049	1.04963	0.970121	1.52815	-2.1639	8.45881	-3.13878	2.14157	0.619443	-6.10096	-1.28631	-4.58452	0.79553	-6.16516	-1.20701	-8.07435	-3.58677	0.646717	-8.00097	-7.03838	3.03659	-4.00173	6.73854	-7.66404	5.17139	-6.24091	5.58658	-3.49285	-7.71073	3.54595
122	-9.58476	3.11058	-5.02104	-5.6741	-8.84346	-1.52648	-2.70391	-1.376	-5.22572	2.00576	0.326019	-5.90832	-7.15466	-4.41503	4.47622	1.09667	-2.36213	5.03881	-2.65489	-2.8145	-6.45401	0.955707	1.5216	-2.94161	8.45455	-3.09552	2.11733	0.639215	-6.38	-1.35899	-4.36024	0.6692	-5.99379	-3.23974	-7.98135	-4.16327	1.2925	-8.70988	-7.08625	3.00744	-3.8767	7.5915	-7.77018	6.70323	-6.12205	5.59978	-3.51003	-7.66613	3.53952
123	-9.86454	4.95431	-2.52369	-6.21023	-9.13531	-2.77498	-3.50461	-1.57993	-6.47422	2.05464	0.47407	-5.63646	-7.24386	-2.08865	4.42586	1.11831	2.00604	-0.969283	-2.86109	-2.83268	-8.54874	-2.06412	1.52469	-6.34254	8.4519	-3.11049	0.687611	0.773231	-6.10176	-1.2934	-4.84379	0.911397	-6.05263	-1.98876	-5.49439	-3.93051	0.684815	-7.73353	-7.28366	-8.65638	-3.88172	6.72145	-8.4164	-1.79416	-6.13208	5.5784	-3.54359	-7.6437	1.3102
124	-8.51855	-9.36261	-5.21483	-5.75882	-3.29521	-1.68711	-2.69353	-0.467511	-5.12853	-1.82877	8.45165	0.779157	0.00754375	-1.65039	1.2187	7.17244	1.75002	-0.969583	-3.0473	1.77034	-8.07772	-2.08416	2.49732	-0.925318	8.45285	-2.46499	0.78618	1.25742	-6.8494	-1.24027	-4.43806	-4.7725	0.465516	-9.57649	-4.33559	0.157073	5.54428	-7.63487	-7.16088	-8.94373	-3.76609	5.86649	8.62172	-1.71456	-4.72019	-3.79725	-1.57846	2.23963	1.44467
125	-6.22448	-10.5198	-5.1015	-5.08133	-3.12299	-0.671805	-2.97988	0.335662	-6.65016	-1.78693	8.44106	-1.06354	-0.590454	-1.06016	1.20043	7.12506	-2.50475	-0.971142	-3.2251	1.75681	-8.55208	-2.11045	2.21889	-4.52757	8.4548	-2.46152	0.469839	1.27	-7.79393	-0.813545	-4.4707	-4.83696	0.419775	-9.65059	-4.22572	0.595963	5.39632	-8.75155	-7.24443	-8.88051	-3.65677	4.39504	8.80827	-1.66156	-4.7274	-3.81148	-1.75183	2.14201	1.57898
126	-8.35418	-9.41937	-4.93676	-5.81688	-4.67884	-4.52704	-2.69765	-1.1903	-5.26402	-1.82376	8.49954	0.883846	0.0372155	-1.58683	1.22279	7.07626	1.48739	-0.968819	-3.43459	1.72188	-6.75627	-2.08777	2.39117	-2.01253	8.44778	-2.46282	0.35626	1.39004	-7.87629	-0.705977	-4.75749	-4.87594	0.535003	-9.57442	-3.88485	0.0889327	5.71909	-7.66661	-7.23575	-8.80108	-3.75703	4.40442	-10.9473	-2.1508	-4.73805	-3.8485	-1.90687	2.15525	1.73673
127	-5.28749	-9.52491	-4.81519	-5.15704	-3.48345	-4.09769	-3.06256	-0.183705	-5.30154	-1.83934	8.62879	-1.1493	-0.575584	-1.33066	1.19371	7.03061	-2.61466	-0.968865	-3.62042	1.45845	-6.56709	-2.05794	2.26447	-4.94766	8.44718	-2.47487	0.580253	1.18895	-7.58344	-1.12871	-4.36177	-4.91007	0.516648	-9.75379	-4.16285	0.575917	5.86815	-8.10934	-7.20178	-8.58069	-3.66484	4.1139	-10.945	-2.03178	-4.74286	-3.83472	-1.2245	2.16111	0.520479
128	-5.47434	-10.3925	-4.99095	-5.17458	-5.08583	-2.46729	-2.9423	-1.5303	-5.74871	-1.57739	8.73728	-1.20605	-0.0213425	-1.54238	1.21231	7.2757	-2.74099	-0.970208	-3.83633	1.58343	-7.82164	-2.27287	2.34857	-3.05576	8.4495	-2.4892	0.864042	1.48055	-7.13566	-0.967627	-4.52164	-4.72868	0.455657	-9.82593	-4.41914	0.131298	5.87308	-8.31286	-7.30032	-9.22807	-3.75404	4.14047	-10.9829	-1.90533	-4.73575	-3.86587	-1.39533	2.1808	0.53724
129	-6.51561	-9.54397	-5.50346	-5.31911	-3.63538	-2.67815	3.59022	-1.71706	-5.34002	-1.26485	8.8327	0.536359	-0.559866	-2.05507	1.20802	7.2584	-2.85317	-0.970271	-1.56734	1.67874	-5.88521	-2.20198	2.46223	-6.17428	8.4504	-2.50686	-0.0455771	1.48779	-7.68849	-0.779463	-4.55991	-4.74213	0.523274	-9.18928	-4.34872	0.208701	5.71436	-8.22919	-7.13979	-8.60315	-3.64913	4.35726	-10.7842	-1.6307	-4.66207	-3.87503	-2.2508	2.1694	0.527874
130	-6.37837	-9.30511	-3.22185	-5.84136	-4.89597	-1.83957	3.75844	0.0832834	-6.09352	-1.43334	8.87327	-1.22449	0.0947863	-2.10653	1.2116	7.22429	2.69887	-0.969638	-4.02152	1.74309	-8.55354	-2.47866	2.29427	-5.32775	-3.13642	-2.52567	-0.0475388	1.93144	-6.99533	-0.91549	-4.41065	-4.75644	0.244316	-9.48666	-3.87662	0.0710725	5.97731	-7.95867	-7.09681	-8.58395	-3.7475	4.59529	-11.0735	-4.69794	-4.75306	-3.88353	-2.15556	2.18711	0.473598
131	-5.35564	-9.74936	-2.95398	-5.11138	-3.80043	-0.658263	3.75638	-0.99401	-5.37168	-1.70651	9.06026	0.673783	-0.547893	-2.00184	1.20843	7.28618	-2.94063	-0.971161	-1.76503	1.10855	-8.44021	-2.34799	2.38321	-5.32737	-2.88623	-2.53687	-0.0264449	2.12258	-7.20341	-0.661675	-4.53284	-4.80126	0.33323	-9.89171	-3.90555	0.565868	5.94687	-8.0313	-7.08969	-8.65596	-3.65544	4.52791	-11.067	-3.59593	-4.74678	-3.88044	-5.23085	2.19981	0.879922
132	-8.18606	-9.38805	-2.85534	-5.51517	-4.78745	-4.33414	3.64217	-1.64246	-5.94047	-0.855522	8.83035	0.379676	-0.536007	-1.51006	1.21575	7.30429	2.94106	-0.970043	-4.20742	0.918049	-8.55587	-2.44727	2.229	-5.32804	-2.37981	-2.54906	0.0213084	1.61639	-7.34282	-0.690469	-4.81492	-5.03853	0.194216	-9.63815	-4.67987	0.0759671	5.53929	-8.46478	-7.04814	-8.97266	-3.63554	4.27608	-11.0362	-3.78681	-4.67353	-3.90088	-4.44189	2.20925	0.746386
133	-5.86168	-9.30521	-5.62406	-5.13388	-5.29778	-10.3143	3.66929	0.358549	1.37472	-0.784292	8.8757	-1.25645	0.068637	-1.20447	1.20618	7.30482	-7.55461	-0.969245	-1.93562	0.732703	-8.28483	-2.81023	2.27176	-5.33247	-2.62637	-2.57026	-0.0228508	1.73653	-7.46736	-0.932489	-4.47706	-5.06386	0.356221	-9.44138	-3.7394	0.550136	5.94449	-7.0933	-7.07069	-8.61873	-3.74482	4.21922	-10.7717	-4.7018	-4.68442	-3.97231	-5.47341	2.22219	0.597902
134	-7.99195	-10.5289	-5.32307	-5.7235	-3.98029	-9.82216	3.38198	-1.77894	1.10207	-1.10566	8.72183	-1.29231	-0.129509	-1.94241	1.21458	7.29355	-7.39339	-0.970351	-2.07857	0.550453	-8.55158	-2.95437	2.21507	-5.32888	-2.13406	-2.61052	0.156618	1.57112	-6.89671	-1.24774	-4.69723	-5.09542	0.204133	-9.68535	-4.02458	0.117399	5.86654	-8.54603	-7.15064	-8.54927	-3.63968	4.05965	-10.6475	-3.39759	-4.72813	-3.96068	-2.32568	2.22707	0.464463
135	-7.77885	-9.33895	-2.77099	-5.86467	-4.30733	-10.5275	3.22842	-0.802472	1.25698	-0.963257	8.73091	0.177814	-0.668318	-2.06038	1.19842	7.18078	-7.44991	-0.971993	-4.39952	1.67842	-6.30552	-2.57202	2.21608	-5.10892	-1.93047	-2.64325	0.250735	1.46296	-7.05325	-0.788019	-4.40341	-5.13588	0.285193	-9.73037	-4.60268	0.0704912	5.93068	-7.16969	-7.28569	-8.88638	-3.74024	4.93763	-10.9616	-4.65358	-4.70912	-3.74953	-4.98178	2.13377	0.353735
136	-5.65181	-9.37652	-2.68181	-5.18298	-5.49172	-10.0751	3.48499	-0.617243	0.98292	-0.767112	8.51139	1.52123	-0.0676088	-1.94353	1.22205	7.21652	-7.29902	-0.970671	-4.81857	1.44327	-5.12089	-2.68834	2.33976	-5.27115	-1.57735	-2.63435	0.0149528	1.56378	-7.87996	-1.09651	-4.44775	-4.94743	0.224826	-9.43698	-4.06597	0.450602	5.30278	-7.10114	-7.24905	-8.83326	-3.62618	4.60475	-10.6809	-4.53346	-4.69603	-3.76514	-2.04318	2.11622	0.284146
137	-6.06623	-9.502	-5.44812	-5.93688	-4.15995	-10.3961	3.24469	0.595591	1.33622	-0.913708	8.62287	-0.0808354	-0.658675	-1.80915	1.20208	7.25464	-7.50134	-0.973024	-4.6029	1.57504	-5.63831	-2.29795	2.25973	-5.32923	-1.7418	-2.69167	0.0768622	2.44548	-8.15342	-1.39956	-4.58502	-4.98519	0.238755	-9.64863	-3.89939	0.567585	5.92318	-8.39429	-7.17673	-8.70673	-3.73248	4.11995	-10.7734	-4.37477	-4.63824	-3.77679	-4.71113	2.12055	0.250363
138	-7.58457	-9.32274	-5.39361	-5.25276	-4.39557	-10.318	3.26006	-1.80236	1.38362	-0.754804	-0.447388	0.00553976	-0.190395	-1.87725	1.20979	7.30207	-7.29496	-0.968436	-5.00913	1.28855	-8.54804	-2.45324	2.48211	-5.11669	-1.27137	-2.66265	0.585311	0.453702	-6.61458	-1.26907	-4.61289	-5.01207	0.168742	-9.94195	-3.94797	0.089704	5.83178	-8.51368	-7.1281	-8.99139	-3.62409	4.72871	-8.03369	-4.59299	-4.76417	-3.93279	-2.4869	2.10807	0.266325
139	-5.55267	-10.1838	-3.83088	-5.93437	-4.40311	-10.4014	3.55647	-0.438631	1.05211	-0.821759	-0.428123	-0.151784	-0.651521	-2.01754	1.21828	7.09573	-7.33951	-0.971467	-5.36846	0.126115	-7.07276	-2.3744	2.42308	-5.2533	-1.38802	-2.62664	0.698493	2.28004	-7.7687	-1.3569	-4.7671	-5.42352	0.208326	-9.94571	-4.48266	0.594738	5.31187	-7.58293	-7.05382	-8.83882	-3.72341	4.50782	-9.11983	-4.46442	-4.76157	-3.93791	-3.57321	2.09204	0.315356
140	-7.40924	-9.37146	-4.05014	-3.39994	-5.64421	-10.5156	3.33919	0.562338	1.08314	-0.657421	-0.672749	1.25046	-0.0409361	-1.7401	1.1592	7.03987	-7.29441	-0.972159	-5.16284	0.0512855	-7.55912	-2.11136	2.40043	-5.32934	-1.42758	-2.66702	0.80616	0.521796	-8.12233	-1.3664	-4.74148	-5.3906	0.129739	-9.46805	-4.23315	0.395488	5.68522	-8.57093	-7.06141	-8.86971	-3.71217	4.67184	-8.77089	-3.96449	-4.59975	-3.93184	-2.97955	2.08321	0.383444
141	-7.24505	-10.1725	-4.25451	-3.46689	-4.33311	-10.5182	3.27288	-3.93853	1.08106	-1.15868	-0.73368	1.38279	-0.634785	-2.08788	1.22763	6.87953	-7.63098	-0.974189	-5.88019	0.00344586	-8.55681	-2.20027	2.46734	-5.23763	-1.28178	-2.58586	0.90128	0.754195	-6.75404	-3.00162	-4.71368	-4.51769	0.332242	-9.90448	-3.57918	0.290612	5.67558	-7.42376	-7.24765	-9.35801	-3.7322	5.1204	-9.32465	-4.26761	-4.76398	-3.93734	-2.44238	2.10073	0.447287
142	-5.47669	-9.44248	-3.0685	-3.42923	-3.06143	-10.5078	3.60306	-4.46651	0.987863	-0.571331	-0.398132	-0.195906	-0.618041	-1.51609	1.22513	7.14666	-7.63902	-0.969359	-5.62019	0.208611	-6.11388	-4.20409	2.31159	-5.33413	-1.64637	-2.69459	0.982737	2.65579	-8.17344	-3.00258	-4.39571	-5.35578	0.239082	-9.64364	-3.59389	0.42971	5.54088	-8.62551	-7.14686	-8.88021	-3.7035	4.16017	-8.20355	-4.12859	-4.61987	-3.92434	-3.27806	2.07856	0.497522
143	-6.98309	-9.27092	-3.4	-3.41516	-4.1541	-10.5188	3.29222	-3.86155	1.20759	-1.0259	-0.370005	-0.237478	-0.0963795	-1.59791	1.16985	6.88119	-7.29403	-0.970512	-6.15024	0.0533177	-8.54038	-3.9593	2.43188	-5.11872	-1.56669	-2.49536	0.0836615	1.0334	-8.05544	-3.00373	-4.57476	-4.48233	0.451566	-9.85945	-4.69204	0.518573	5.82581	-7.49748	-7.28299	-8.96547	-3.68813	4.69063	-8.11878	-2.50436	-4.5735	-3.95528	-4.15824	2.06602	1.20215
144	-5.50697	-9.08263	-3.61191	-3.41245	-3.08366	-9.32066	3.6847	-3.81052	1.09594	-0.768883	-0.842095	1.12773	-0.288389	-1.68104	1.22634	6.88648	-7.62409	-0.971426	-6.60879	0.0746054	-7.29503	-4.08108	2.35118	-5.28904	-4.88237	-2.54322	0.167529	2.56263	-6.4928	-3.003	-4.51678	-5.31582	0.487057	-9.65389	-3.627	0.320702	5.41039	-7.34918	-7.23063	-9.12885	-3.62778	5.27586	-8.28849	-2.65553	-4.76285	-3.94729	-2.52174	2.04865	1.03575
145	-9.16203	-9.3517	-4.64774	-3.40453	-3.09766	-10.4467	3.19849	-4.48343	1.29667	-1.04691	-0.469626	-0.306777	-0.317821	-1.76636	1.22741	6.87764	-7.28569	-0.970069	-6.38554	0.13368	-8.54862	-3.83094	2.50026	-5.35514	-1.86522	-2.41539	0.255587	1.29499	-8.1915	-3.00172	-4.49291	-5.27296	0.498078	-9.92554	-4.71246	0.458019	5.37936	-8.56512	-7.05455	-8.98791	-3.82511	4.65358	-8.48063	-4.28725	-4.48327	-3.94085	-3.87085	2.0584	1.12312
146	-5.62247	-9.03452	-4.67093	-3.38908	-4.22614	-10.4315	3.06716	-4.56217	1.00516	-0.896795	-0.345942	1.17266	-0.351334	-1.85528	1.19365	6.89164	-7.61775	-0.97148	-7.02249	0.247491	-6.66091	-3.72789	2.48677	-5.23958	-1.74334	-2.45838	0.368306	1.51317	-8.00109	-3.00158	-4.53871	-5.22889	0.409347	-9.85206	-4.12389	0.501353	5.33371	-8.56712	-7.04448	-8.70415	-3.69517	4.24688	-8.94268	-2.26071	-4.75863	-3.9312	-2.55237	2.03486	1.06861
147	-7.10243	-9.41121	-4.71882	-3.39925	-3.10007	-10.5022	3.21904	-3.76716	1.17206	-1.31448	-0.52191	1.12102	-0.156487	-1.40493	1.17957	6.89974	-7.31366	-0.92593	-6.82233	0.394481	-8.55163	-3.61523	2.46189	-5.33841	-5.11687	-2.31071	0.479451	2.8227	-7.40012	-3.00137	-4.53709	-5.18171	0.463442	-9.54423	-4.40025	0.531783	5.33438	-8.55451	-7.11505	-9.45952	-3.63077	5.45379	-8.40662	-2.37277	-4.54484	-3.8924	-1.81384	2.02754	1.04128
148	-8.87004	-10.4049	-5.55718	-3.58357	-4.1167	-9.57161	3.09973	-3.70974	1.13303	-1.18293	-0.323486	-0.588018	-0.221614	-1.47929	1.22224	6.89908	-7.59344	-0.96928	-7.24583	0.955155	-5.3763	-3.4738	2.39052	-5.19573	-2.01288	-2.34518	1.06981	1.34827	-8.09687	-3.00299	-4.69162	-4.66791	0.330834	-9.36878	-3.80973	0.266765	5.51756	-9.41651	-7.22315	-9.02088	-3.80839	5.59713	-8.35468	-4.4461	-4.7595	-3.91302	-2.09597	1.97957	1.0327
149	-8.9939	-9.40096	-4.43789	-3.43229	-4.09231	-10.3902	3.20033	-4.61268	1.12808	-1.52463	-0.96025	1.10837	-0.253478	-1.41633	1.17471	6.89903	-7.36121	-0.956103	-8.65936	0.779126	-8.54969	-3.35592	2.45835	-5.14941	-5.20805	-2.37609	1.02248	1.08977	-7.27481	-3.00192	-4.44317	-4.71518	0.173389	-9.6535	-4.32968	0.190991	5.40301	-9.4276	-7.3216	-8.96999	-3.67184	4.05488	-8.61482	-3.01886	-4.75017	-3.91893	-2.55431	2.01249	1.06597
150	-6.81283	-9.1147	-4.56379	-3.54761	-4.15193	-10.165	3.22309	-3.63642	1.1047	-1.42729	-1.07425	-0.417923	-0.437366	-1.41445	1.21922	6.89908	-7.35524	-0.970246	-9.19551	1.13366	-8.55878	-3.20724	2.48756	-5.30705	-1.98123	-2.21699	1.08587	1.20362	-8.15553	-3.00697	-4.82897	-4.70031	0.236625	-9.91885	-4.47773	0.240888	5.31535	-9.40688	-7.32347	-8.6884	-3.62356	4.60464	-10.5291	-3.20901	-4.51141	-3.91131	-1.52858	1.99929	1.07204
151	-8.71108	-10.2474	-4.63279	-3.51045	-4.20418	4.5177	3.38187	-4.64233	1.17055	-1.68454	-0.308357	-0.77756	-0.47361	-1.4486	1.18969	6.92918	-7.61753	-0.969894	-9.27581	1.30738	-6.8907	-3.07901	2.21026	-5.11211	-4.7279	-2.27249	1.04431	0.726267	-7.97151	-3.00222	-10.2193	-4.57349	0.115361	-9.91969	-3.97991	0.45643	5.39474	-9.42405	-7.22281	-9.50356	-3.79499	4.08753	-11.0555	-4.57738	-4.75126	-3.89849	-2.55756	1.96983	1.03115
152	-5.83024	-9.3214	-6.45084	-3.42677	-4.10429	4.51424	3.39452	-3.54788	1.14625	-1.60895	-0.492965	0.975689	-0.510234	-1.44465	1.21881	6.91052	-7.34761	-0.969745	-8.73355	0.320771	-5.99227	-2.53605	2.23972	-5.28841	-4.78817	-1.99362	1.10398	0.995407	-7.63525	-3.00621	-10.0341	-4.54609	0.136608	-9.83748	-3.67419	0.346122	5.53923	-9.42229	-2.20893	-8.84738	-3.68353	4.05368	-10.8079	-4.66259	-4.44347	-3.9128	-2.38994	1.95313	1.05915
153	-6.6392	-9.2253	-6.76751	-3.47274	-4.36097	4.46492	3.30772	-4.63496	1.37888	-1.78247	-0.28543	-0.935668	-0.374642	-1.41099	1.18314	6.94717	-7.62585	-0.971282	-9.20541	0.613267	-5.55789	-2.52428	2.30175	-5.32454	-5.01833	-2.15137	1.09839	0.857502	-8.04314	-3.00704	-11.179	-4.59685	0.148625	-9.61521	-4.43383	0.370472	5.30754	-9.41583	-2.11123	-8.97437	-3.62477	4.52327	-9.84082	-2.82851	-4.75761	-3.89029	-2.68205	1.94323	0.984138
154	-5.70318	-9.96874	-6.57747	-3.43502	-0.652227	4.48692	3.4857	-4.60947	1.1746	-1.73369	-0.55516	1.05656	-0.410711	-7.87732	1.22104	6.9812	-7.62082	-1.77933	-8.74676	0.458371	-5.56541	-11.7059	2.23406	-5.33049	-3.90355	-2.09281	-4.96347	0.55151	-7.5286	-3.00142	-11.3338	-4.6305	0.109627	-9.04734	-4.60706	0.330484	5.70855	-9.43266	-1.96852	-2.79519	-3.78132	5.69254	-9.58431	0.468035	-4.76328	-3.88189	-6.22367	1.92563	7.46001
155	-9.68013	5.00622	-6.4148	-3.432	-0.801748	4.25853	3.22316	-3.4617	1.3104	-8.06767	-1.12636	1.44344	0.023595	-7.64441	0.53106	1.93772	-7.35018	-1.66037	-8.74958	-3.6677	-7.34733	-11.3381	-3.81844	-5.33969	-4.53632	-3.22318	-4.87928	-0.0357707	6.74184	-3.00825	-10.3926	-0.558386	-7.96718	-1.90982	-1.891	6.80544	-2.93617	-9.42808	-5.27767	-4.19562	-3.09456	4.70115	-10.2665	0.348488	-6.26477	8.07362	-6.25891	-0.462802	7.42821
156	-9.84714	5.29059	-6.6549	-3.41716	-0.648012	4.55269	3.15632	-4.54979	1.15723	-8.17998	-1.05113	1.12068	-0.697591	-7.41729	-0.0664516	2.07548	-7.35063	-1.77616	-9.42486	-3.85824	-5.61053	-11.6912	-3.85361	-5.32083	-4.35252	-3.13387	-5.17126	-0.0280441	6.83292	-3.00107	-11.2235	-0.555555	-8.18396	-2.13105	-2.00934	6.63974	-3.2404	-9.42628	-1.81334	-4.70573	-2.28832	4.97666	-10.045	0.146818	-6.27572	7.99696	-6.25116	-1.96244	7.42095
157	-9.84753	5.51033	-6.82115	-3.48581	-0.653743	4.54046	3.54057	-3.37006	1.1683	-7.87428	-0.607799	1.45792	-0.735625	-7.22851	0.570849	2.23704	-7.6356	-1.7764	-8.77987	-2.74404	-7.54219	-11.4562	-3.85354	-5.34952	-4.66075	-3.09317	-5.10844	-0.0381192	6.63256	-3.00305	-11.468	-0.537651	-8.02592	-2.41634	-1.92221	6.86445	-3.55038	-9.42326	-4.9935	-4.0083	-3.07542	4.78105	1.80846	0.667263	-6.30739	7.85626	-6.18156	-0.246935	7.49697
158	-9.84834	5.09709	-6.86338	-3.60376	-0.747326	4.06845	3.1079	-3.29313	1.08626	-7.95115	-0.265187	1.00119	-0.663781	-7.06976	-0.112845	2.14858	-7.34056	-1.83729	-9.3965	-2.74476	-5.81792	-11.6978	-3.81894	-5.30651	-3.64469	-3.02758	-4.92844	-0.0345954	6.67492	-3.00287	-10.7257	-0.527965	-8.24227	-3.17866	-2.19579	6.67066	-3.86212	-9.43484	-4.55906	-2.69106	-2.35375	4.61824	1.6882	0.510931	-6.31369	7.92205	-6.18516	-0.0274045	7.37873
159	-9.40552	5.10287	-6.60898	-3.60622	-0.661872	4.57599	3.25981	-4.46459	1.36308	-8.31403	-0.250543	1.47613	-0.00500108	-6.80422	0.608391	1.98853	-7.31218	-1.62908	-9.50733	-7.75223	-6.42192	-11.3851	-3.81583	-5.47962	-3.37931	-3.02467	-5.23841	-0.0381243	6.69971	-3.00146	-11.3083	-0.605914	-7.90452	-1.92026	-1.97827	6.85828	-4.16043	-9.41059	-2.28783	-4.60717	-2.4973	4.95593	1.50387	0.600973	-6.34471	7.80638	-7.00692	-2.00352	7.55866
160	-9.55852	5.06061	-6.64782	-3.61764	-0.775487	4.47035	-7.23317	-4.11467	1.33476	-8.46552	-0.581672	1.2366	-0.043709	-6.94328	0.083008	1.88724	-7.26579	-1.83368	-8.86873	-4.0194	-6.82853	-11.3056	-3.85417	-5.27024	-4.11998	-3.01616	-5.14017	0.000524272	6.5452	-3.00257	-11.1486	-0.584074	-8.04432	-2.17269	-2.08261	6.86955	-4.43662	-9.38932	-4.75241	-4.53057	-3.10031	4.54477	2.18826	-0.084589	-7.12631	7.78163	-5.74368	1.92966	7.3001
161	-9.84532	5.11602	-6.69468	-3.46256	-0.659388	4.2322	-8.13783	-3.19634	1.19209	-8.61372	-0.914337	1.49532	-0.803283	-10.1296	0.637456	1.86562	-7.61118	-1.7837	-9.43628	-2.75119	-6.66234	-11.6852	-3.82154	-7.77062	-1.19741	-2.99839	-5.15544	-0.0751174	6.58609	-3.00349	-11.489	-0.573177	-7.94013	-2.09002	-2.4104	6.75158	-4.65589	3.38518	-2.27181	-3.84984	-2.61269	5.01436	2.10178	3.4417	-6.2805	7.75839	-7.45996	-0.707337	7.6391
162	-9.84304	5.02981	-6.67245	-3.53578	-0.771638	4.31624	-8.02189	-4.02919	1.08183	-8.85408	-0.244759	1.20573	-0.0791375	-9.89911	-0.0225486	2.52252	-7.21075	-1.49176	-9.02716	-4.21208	-5.51144	-11.6814	-3.82427	-8.13288	-5.00493	-2.97457	-5.21813	0.0875681	6.87364	-3.00365	-10.5597	-0.556214	-8.11523	-2.36008	-2.49044	6.85015	-4.81474	4.26519	-2.55833	-3.06027	-3.17386	4.50843	2.0216	1.66525	-6.26574	7.73804	-7.28883	2.21626	7.18802
163	-9.84008	5.47947	-6.57067	-3.61956	-0.787026	4.3855	-7.33237	-3.22882	1.13799	-8.82416	-0.798844	1.22793	-0.116563	-9.66202	0.674813	2.56164	-7.63171	-1.68951	-9.2706	-7.52059	-6.19519	-11.4298	-3.82152	-7.74782	-7.67328	-2.93211	-5.28513	0.0686203	6.80965	-3.00311	-11.0114	-0.399697	-7.91923	-2.3166	-2.30623	6.76632	-4.9522	3.75058	-2.69059	-4.47331	-2.70841	5.10174	1.95057	1.84778	-7.03808	8.4547	-5.63068	-2.39253	7.18756
164	-9.82741	4.99916	-6.7254	-3.61348	-0.663324	4.4091	-7.89639	-3.18746	6.27215	-8.74023	-0.6373	1.51377	-0.769797	-9.3048	0.114291	2.47631	-5.54986	-1.82883	-9.62957	-3.08278	-6.9034	-11.6719	-3.84559	-8.6787	-7.82958	-2.88445	-5.12362	0.033292	6.78416	-3.00294	-9.81795	-0.358471	-7.92844	-2.90584	-2.65097	6.70837	-5.07088	4.28716	-2.78505	-4.36111	-3.12314	5.18178	1.68275	3.59585	-6.21945	8.3909	-7.15452	0.167636	7.41613
165	-9.8215	5.07682	-6.60992	-3.50266	-0.662938	4.2921	-7.09772	-4.18542	6.30294	-8.82574	-0.771696	1.54318	-0.525436	-9.47663	0.71248	2.32988	-5.54425	-1.77452	-9.64693	-7.29776	-7.10602	-11.2905	-3.84979	-8.35617	-4.53839	-2.86573	-5.06676	0.070584	6.7776	-3.00245	-10.8329	-0.338125	-7.96954	-1.92326	-2.73795	6.87156	-5.12412	3.24591	-2.86352	-4.3193	-2.78516	4.56209	1.7799	1.45552	-7.1862	8.29487	-6.1857	0.355283	7.63725
166	-9.83146	5.11388	-6.67611	-3.56295	-0.78992	4.49932	-7.1645	-4.28746	6.1986	-8.24333	-0.650527	1.23414	0.165522	2.4317	0.0352008	2.13412	-5.53881	-1.79172	-9.51079	-3.23332	-5.60222	-11.664	-3.84758	-7.88135	-1.67663	-2.84246	-5.12277	-0.039964	6.95187	-3.00082	-11.4599	-0.319505	-7.91106	-2.04097	-2.57386	6.83771	-5.14944	3.52944	-2.05505	-2.41826	-3.32763	4.54164	1.57415	3.2837	-6.25481	8.21331	-7.05919	-2.10155	7.88497
167	-9.8281	5.09466	-6.86533	-3.61043	-0.780704	4.20836	-8.45775	-4.22646	6.15933	-8.38767	-0.627892	0.802356	-0.59701	2.32728	0.183447	2.26199	-5.54666	-1.53464	-9.64753	-7.03536	-5.68334	-11.2866	-3.84996	-8.76159	-0.75045	-2.80707	-5.24719	-0.0167994	6.9291	-3.00165	-10.8265	-0.502472	-8.01222	-3.0009	-2.94732	6.87523	-5.16585	4.31413	-2.32876	-2.91283	-2.83372	4.97891	1.53698	2.88509	-6.22459	8.14271	-6.05992	-0.948319	8.11945
168	-9.81717	5.44566	-7.14424	-3.59593	-0.659158	3.95967	-7.17155	-4.40422	6.19315	-8.73157	-0.65062	1.30633	0.136483	2.98001	0.829323	2.41365	-5.54867	-1.77559	-9.64398	-3.33925	-7.4033	-11.6537	-3.85047	-8.063	-4.36853	-2.76655	-5.23759	-0.321783	6.90012	-3.00237	-9.59613	-0.47658	-7.90121	-1.96701	-2.8569	6.83394	-5.16841	3.97239	-3.76006	-4.6597	-3.23818	5.2248	1.59617	2.48044	-6.65851	7.94933	-5.89913	-2.24527	8.31727
169	-9.66091	5.00331	-6.9987	-3.5261	-0.667875	4.13995	-7.7024	-4.5871	6.38408	-8.56957	-2.48111	1.26349	-0.457876	2.38807	0.755535	2.57888	-5.53074	-1.71849	-9.62844	-6.75069	-5.50672	-11.2776	-3.85215	-8.74609	-3.96713	-2.7296	-5.17715	0.035607	6.94048	-3.00146	-11.4411	-0.443636	-7.94158	-1.99763	-1.93101	6.86844	-0.995603	4.01892	-3.63286	-4.16596	-2.8932	4.49833	1.91708	3.10588	-6.33066	7.85633	-5.47842	-1.18597	8.53156
170	-9.20708	5.20001	-6.80683	-3.50004	-0.795777	3.97948	-8.42155	-4.54309	6.60995	-8.11007	-2.12086	0.658191	0.10264	2.35954	0.148359	1.99873	-5.51881	-1.82938	-7.90422	-3.47087	-5.50489	-11.4484	-3.85078	-8.53285	-0.980725	-5.07247	-5.25356	-0.176649	5.87925	-3.00216	-10.9524	-0.230058	-8.08578	-2.66014	-2.02337	6.65367	-1.00552	3.84134	-3.49645	-2.43996	-2.91939	4.87511	1.59007	2.68322	-6.19768	7.68946	-6.8846	0.758068	9.25831
171	-9.50329	5.01128	-6.61346	-10.7105	-0.67223	4.0682	-7.42367	-4.50588	-9.61526	-8.06965	-2.42833	1.30389	-0.631099	2.41775	0.219801	1.98369	-5.54126	-1.85037	-9.60066	-6.46515	-5.6424	-11.6414	-3.84075	-8.66723	-4.19675	-4.84281	-5.33184	0.0569671	6.18675	-3.00125	-10.9067	-0.236266	-8.02067	-2.02333	-2.72387	4.35056	-5.18869	3.64845	-3.24488	-2.52096	-2.86623	5.03774	1.83689	2.02845	-6.70603	7.76587	-6.92518	-1.4155	7.45239
172	-9.33584	5.01213	-6.57472	-10.5961	-0.674131	4.02819	-7.14833	-7.67858	-8.86648	-8.30064	-2.09056	0.734963	0.0713921	2.37653	0.265092	2.32234	-5.52289	-1.84444	-9.64174	-3.03874	-5.7124	-11.3429	-3.8418	-8.26394	-6.89606	-5.31376	-5.278	-0.505503	6.33455	-6.05453	-11.4129	-0.985616	-8.13458	-2.25223	-1.97748	4.30164	-0.978715	3.92549	-3.37145	-4.77989	-2.98669	4.62953	2.1623	2.33541	-6.30872	7.62272	-5.54073	0.481726	7.50526
173	-9.08719	5.14093	-7.28357	-8.87517	-0.645806	4.02882	-7.14552	-7.73904	-9.59979	-8.11944	-2.41718	1.31025	0.0436138	2.32631	0.305952	2.05496	-5.51572	-1.77258	-8.07471	-2.97132	-6.90176	-11.625	-3.83706	-8.76869	-0.53966	-4.61506	-5.14375	0.102555	5.90208	-7.73327	-11.0565	-0.261109	-7.95787	-1.98071	-2.80118	4.23966	-5.20992	3.21783	-3.12292	-3.37056	-2.93934	5.00987	1.62517	2.19578	-6.06538	8.31355	-6.80548	-2.52883	9.01204
174	-8.99509	5.54776	-6.73876	-10.7082	-0.701352	4.15035	-8.28452	-7.6644	-7.4586	-8.11943	-2.70538	0.551023	-0.563941	2.73001	0.866924	2.22227	-5.55445	-1.77568	-8.28948	-5.63787	-6.91235	-11.5785	-3.83996	-8.42477	-3.72134	-3.06162	-5.19058	-0.439125	5.96127	-7.84432	-11.4237	-0.969514	-8.28685	-2.78615	-2.07121	4.30898	-1.01093	3.2295	-2.97695	-4.82643	-2.23197	4.83543	2.07002	0.751468	-6.77785	8.22796	-6.97618	0.955586	7.46634
175	-9.1387	5.03578	-7.42707	-10.6924	-0.639386	4.00051	-7.56736	-7.63877	-6.04828	-8.48043	-2.47018	1.33347	-0.354508	2.38796	-0.299753	1.96472	-5.51632	-1.81613	-9.64786	-5.91408	-5.58118	-11.6056	-3.84393	-9.00668	-3.48824	-3.10604	-5.29754	0.126925	5.92335	-5.86465	-11.1273	-0.287904	-8.31903	-2.13818	-2.8829	4.29619	-0.979559	4.11863	-4.3917	-2.47279	-3.038	5.03056	1.56153	3.69845	-6.92684	8.1261	-5.46235	-1.61681	8.76793
176	-9.00508	5.34753	-6.74737	-9.24269	-0.642855	4.0081	-7.08283	-7.63243	-9.59669	-8.70826	-2.13785	0.599895	-0.331277	2.85192	0.344284	2.09391	-5.55478	-1.84991	-9.61314	-3.1439	-7.56578	-11.5793	-3.8447	-8.50591	-7.42727	-5.80721	-5.322	0.091926	6.05792	-5.95559	-10.791	-0.234065	-8.20521	-1.98293	-2.14141	4.35604	-1.15332	4.13722	-4.25286	-3.21852	-3.49654	4.73141	1.95688	0.721633	-6.85843	8.04253	-6.95344	-2.67188	7.4914
177	-8.99681	5.01754	-6.85994	-9.02278	-0.685326	4.05575	-7.76658	-7.81443	-9.6103	-8.61827	-2.58171	1.35672	-0.306741	2.4786	0.793715	1.85599	-5.50746	-1.60133	-8.5088	-6.19338	-5.59015	-11.5012	-3.84364	-8.06589	-7.15943	-5.56948	-5.23588	-0.525255	5.88561	-7.54357	1.23432	-0.258389	-8.17933	-3.07484	-2.09241	4.36118	-1.036	3.19426	-4.1397	-3.88064	-2.26584	6.46487	2.21182	0.753332	-5.78477	7.60378	-5.49862	-2.83018	9.51081
178	-8.97582	5.52942	-6.53166	-10.5929	-0.716007	4.01779	-7.03702	-7.59974	-8.64177	-8.73957	-2.23064	1.38651	-0.48876	2.18193	-0.239858	1.81775	-5.55254	-1.74781	-9.38305	-4.47037	-7.6176	-11.7134	-3.84212	-7.75193	-2.96512	-3.12087	-5.21342	0.0199918	6.12583	-5.739	0.287498	-0.295058	-8.31859	-2.09165	-2.5916	4.23581	-1.05557	4.06644	-4.04808	-4.82286	-3.0124	3.04985	2.08405	1.09468	-5.96451	7.63372	-6.30179	-1.85439	7.50455
179	-9.85078	5.09847	-6.85892	-8.71332	-0.638616	4.37331	-7.12373	-7.61547	-7.70432	-8.75504	-2.88365	0.553972	-0.420274	2.52764	0.37749	1.87637	-5.51138	-1.77352	-9.62729	-2.79525	-7.16769	-11.5344	-3.82979	-8.51165	-6.09032	-6.3144	-5.30876	-0.0229329	6.72656	-7.6243	0.778686	-0.489716	-8.25946	-2.04132	-2.66355	4.33341	-1.0298	4.11645	-3.98046	-2.61963	-3.55206	4.735	2.17662	3.72061	-6.43351	7.67363	-6.41448	-1.77149	7.44356
180	-9.84784	5.10506	-6.49092	-10.6685	-0.714665	3.9712	-7.86998	-7.68584	-5.65461	-8.52366	-2.59879	0.615428	-0.384001	2.31111	-0.273558	2.01123	-5.5523	-1.57235	3.29472	-5.05843	-5.50883	-11.5523	-3.83253	-8.2817	-5.80777	-3.09813	-5.32191	0.0252664	6.00595	-8.24545	0.402044	-0.496087	-8.09924	-2.49522	-2.11191	4.2687	-1.3075	3.12282	-3.91895	-3.52676	-2.27624	6.27693	1.70908	1.22594	-5.86895	7.72587	-6.21994	1.14572	7.45251
181	-9.85361	5.39172	-6.88797	-10.7179	-0.724154	4.14734	-7.85052	-7.6719	-9.60899	-8.66585	-2.81746	1.37325	-0.218551	2.52136	0.414368	2.18516	-5.49968	-1.78195	3.28132	-2.74966	-5.62924	-11.4924	-3.82584	-9.23941	-3.22669	-6.54596	-5.20914	-0.00168466	6.79246	-6.59327	1.23814	-0.566963	-8.23393	-2.07525	-2.22561	4.26166	-1.75716	4.09238	-3.85952	-4.7881	-3.40185	6.62817	2.22584	3.72952	-6.40112	7.70096	-5.60819	-1.9028	7.45467
182	-9.23642	5.0156	-6.85895	-10.6575	-0.729772	-8.21273	-7.72709	-7.89047	-9.60498	-8.14328	-2.35517	1.40478	-0.189528	2.53767	-0.157512	2.44309	-5.54972	-1.80072	3.28338	-4.76195	-7.07978	-11.5139	-3.8268	-7.86716	-6.37304	-6.07694	-5.24933	0.0792669	6.48231	-6.44836	0.402334	-0.817511	-8.29012	-2.10743	-2.20467	4.32345	-1.51543	3.05515	6.75895	-4.04052	-3.06311	2.93887	2.16226	3.70402	-5.81683	7.56757	-5.55685	-2.99125	7.45244
183	-9.10909	5.13164	-1.78839	-10.3934	-0.719477	-7.84767	-8.44376	-7.56242	-9.32778	-8.33974	-2.88414	0.880866	-0.147801	2.24275	0.454947	2.3464	-5.54949	-1.84051	3.79954	-2.89572	-6.87988	-11.4722	-3.83438	-7.74349	-2.42818	-3.12035	-5.28456	0.0541082	6.40724	-8.37857	0.672533	-0.947812	-8.28924	-1.95359	-2.56231	4.40857	-2.02049	3.1257	6.67399	-2.5653	-2.27351	4.46179	2.07174	0.829744	-6.4893	7.59653	-6.55724	1.3752	7.45686
184	-9.0611	5.11869	-4.7533	-10.7172	-0.740119	-7.62564	-7.02617	-7.60312	-9.10521	-7.88207	-2.778	1.42361	-0.278889	2.48657	-0.20199	2.45475	-5.50435	-1.78016	3.31773	-5.34658	-6.83763	-11.4815	-3.83302	-8.44287	-6.64561	-3.12589	-5.19452	0.0786189	6.26082	-6.30264	0.520901	-0.636458	-8.09612	-3.3254	-2.1103	4.34278	-2.30767	4.2209	6.80837	-3.68662	-3.4566	2.99129	2.21281	0.938031	-6.60973	7.57201	-6.6887	1.63698	7.44189
185	-9.84948	5.02445	-2.1634	-8.79639	4.07068	-8.02399	-7.7023	-7.8778	-5.87816	-7.97647	-2.49223	0.716706	-0.254905	2.28951	0.494133	2.3824	-5.55057	-3.0745	3.3512	-2.84777	-6.52671	-12.8124	-3.83333	-8.04935	-2.69773	-3.09597	4.41286	0.0490442	6.61992	-7.97259	1.18074	-0.557322	-8.17355	-2.59458	-2.55131	4.1835	-2.61965	3.02292	6.62624	0.971316	-3.04895	3.80549	1.72276	-3.31208	-6.55591	7.57422	-6.20393	-1.92802	3.70584
186	-4.10959	0.971788	-1.56628	-10.704	4.96862	-7.76732	-8.5298	-7.58631	-7.23304	4.88029	-2.61808	-6.542	-0.877779	2.21639	3.63315	1.91085	-5.49682	-1.99522	3.37369	-10.0497	-6.92389	-12.2772	-9.02222	-8.30429	-4.7594	-6.94797	4.40321	-2.16354	-0.446295	-8.11251	0.318682	1.79491	3.76612	-6.54034	-9.41164	4.41765	-7.90308	4.24035	6.62488	1.43462	-5.91156	6.83332	1.92268	-4.04877	-6.65073	0.472789	-5.96679	-8.74889	3.79071
187	-4.18349	0.301554	-1.9624	-10.6128	4.10221	-8.27151	-7.12975	-7.52221	-9.36497	4.88283	-2.73741	-8.15181	-0.866347	2.15686	3.66334	1.79538	-5.49149	-2.19434	3.39169	-9.56231	-6.74418	-12.4164	-8.99654	-7.8095	-1.9292	-3.12591	4.42126	-2.26901	-0.443974	-6.16438	0.73224	1.91263	3.71546	-6.33857	-9.13435	4.31427	-7.89777	4.13866	6.83625	0.834275	-5.75726	2.91614	1.80681	-5.30676	-6.33139	0.489287	-5.7015	-8.93667	3.88061
188	-4.15949	-1.67698	-1.88868	-10.5553	4.96388	-8.20807	-6.97961	-7.51854	-9.60901	4.86863	-2.90025	-6.34129	-0.814049	2.13589	3.66424	1.71521	-5.55306	-2.68333	3.38123	-10.0484	-6.53848	-12.8053	-9.01865	-8.52444	-2.16141	-6.75853	4.38308	-2.04798	-0.444023	-6.92881	0.316562	1.68644	3.86019	-6.35345	-9.37178	4.25021	-7.94573	3.03958	6.77034	0.91251	-5.50602	4.21383	3.63139	-3.37003	-6.18153	0.454631	-6.72405	-8.92178	3.94148
189	-4.19952	-1.64632	-1.73509	-10.6922	4.9142	-8.32341	-7.81519	-7.74058	-6.76861	4.87448	-2.82818	-8.40128	-0.822073	2.14479	3.671	1.68201	-5.48308	-2.60709	3.42132	-8.94974	-7.01282	-12.3494	-8.46195	-7.86346	-5.54994	-7.38627	4.39492	-2.38155	-0.430087	-6.82915	1.12895	1.60925	3.8101	-6.33705	-9.2364	4.21315	-8.38576	4.16998	6.81385	1.42103	-5.91151	2.89158	3.64419	-3.48001	-6.22695	0.505026	-6.45052	-8.90358	4.09656
190	-4.14275	0.533262	-3.09282	-10.6949	4.18393	-7.89815	-7.70154	-7.77668	-5.74346	4.89109	-3.06692	-8.65352	-0.854022	2.60741	3.68448	2.23676	-5.48031	-2.21179	3.45939	-10.0508	-6.93545	-12.8267	-8.95444	-8.53001	-1.4383	-3.22087	4.4302	-2.34279	-0.400164	-6.7178	0.872336	2.28839	3.9152	-6.34597	-9.30062	4.38886	-8.20966	3.08204	6.64437	0.82827	-5.52323	6.89193	3.67903	-3.45534	-6.70935	0.433048	-4.84087	-9.03158	4.25757
191	-4.18914	-1.65563	-1.2313	-9.9946	4.9473	-7.87778	-6.10632	-7.57985	-9.60078	4.89687	-3.08518	-6.81064	-0.879097	2.43902	3.66802	2.15528	-5.54198	-3.03249	3.47592	-10.0049	-6.42709	-12.7647	-8.48513	-7.93284	-5.26958	-7.16116	4.2974	-1.45008	-0.427053	-7.15359	1.01159	2.15421	4.00927	-6.33649	-8.91003	4.20697	-8.04369	4.19891	6.71402	0.960511	-5.90772	4.001	3.53171	-5.21505	-6.11637	0.535082	-4.79344	-9.03865	4.39421
192	-4.13445	0.786659	-2.62601	-10.2039	4.88462	-8.15423	-6.10627	-7.53001	-8.43287	4.88668	-2.71304	-8.893	-0.825363	2.41113	3.71919	2.04196	-5.47398	-2.14385	3.32169	-9.84681	-7.05864	-12.4718	-9.03292	-0.50878	4.38476	-3.37417	4.31555	-1.45919	-0.396007	-5.57131	0.648824	2.03219	3.96478	-6.23043	-9.46844	4.27818	-6.27679	5.03734	6.82689	1.00819	-5.40932	6.73729	3.57866	-5.24947	-6.12151	0.552382	-5.43634	-8.88419	3.93129
193	-4.09692	-1.46359	-2.38924	-10.7037	4.09913	-8.38512	-5.34397	-7.50759	-7.00802	4.89766	-2.44868	-6.68721	-0.870221	2.60096	3.67334	1.87769	-5.53987	-2.23726	3.49751	-10.048	-6.87562	-12.4895	-8.96329	-0.39482	3.50247	-8.0043	4.27595	-1.52464	-0.434871	-8.36356	0.440734	1.51784	4.12465	-6.59243	-8.85975	4.40045	-6.25866	3.85734	6.74128	1.38339	-5.63691	5.84171	3.6166	-3.76115	-6.12563	0.552318	-4.94581	-8.96188	4.23256
194	-4.08363	-1.58996	-1.38367	-10.6216	4.86816	-7.97754	-4.46231	-7.54412	-6.26781	4.8813	-2.77049	-9.02217	-0.840843	2.28457	4.34097	2.14678	-5.54401	-2.97538	3.30781	-9.98713	-6.91433	-12.8124	-9.02736	-0.30941	4.57296	-3.53364	4.27749	-1.47303	-0.399801	-7.4035	0.867285	1.5723	3.24555	-6.51281	-9.00244	4.26976	-6.18199	4.69604	6.67166	0.919039	-5.90126	6.96315	3.63713	-5.01804	-6.68625	0.552044	-5.18404	-9.05577	4.09075
195	-4.03343	1.19001	-2.85985	-9.7559	4.53128	-7.69769	-5.91721	-7.62263	-9.54472	4.88544	-2.75973	-6.86849	-0.829449	2.51486	4.1494	2.23295	0.93625	-3.21129	3.30211	-9.25764	-6.49006	-12.8144	-8.95666	-0.309257	3.43776	-7.60366	4.28799	-1.69809	-0.427746	-5.37058	0.307451	1.65745	4.06501	-6.24085	-9.46111	4.194	-6.07497	4.5451	6.59304	0.825703	-5.45467	3.60619	3.68241	-3.06839	-6.16736	1.36801	-8.0445	-8.98732	3.97315
196	-4.01826	-1.53328	-0.909634	-10.7059	4.8599	-8.2286	-4.88201	-7.27575	-5.59506	4.89882	-2.31593	-8.80004	-0.867806	2.50821	3.97867	2.26636	0.857462	-2.28999	3.48618	-9.99678	-6.3415	-12.4946	-8.63975	-0.469091	4.67769	-3.71286	4.36405	-1.59904	-0.441566	-8.35316	0.918583	1.55148	3.21856	-6.4216	-9.42516	4.29353	-6.02124	3.85466	6.68347	0.877629	-5.6629	6.93532	3.73916	-4.83798	-6.19227	0.34095	-8.1339	-8.98136	3.91954
197	-4.12501	1.3903	-3.37721	-10.6886	4.26804	-7.94476	-5.1114	-7.05923	-7.96249	4.89186	-2.60156	-6.89454	-0.874439	8.55792	3.86773	1.77745	0.870128	-2.08261	3.51833	-10.0482	-7.00517	-12.4696	-9.01848	-0.750341	3.76369	-3.91347	4.37351	-1.93202	-0.435014	-7.04585	0.37622	1.51291	4.23043	-6.31569	-8.94816	4.22806	-5.99482	3.89964	6.79756	1.08518	-5.40517	6.07387	3.67544	-3.1861	-6.73496	0.415739	-7.99874	-9.04577	3.90473
198	-4.04869	-1.29878	-1.07644	-10.7091	4.8559	-7.51157	-6.08838	-7.56142	-9.61403	4.92752	-2.21968	-4.77859	-0.825819	7.65292	3.76356	1.77528	0.84646	-2.68775	3.56678	-10.012	-6.61041	-12.8171	-8.95174	-0.457033	3.57961	-4.13056	4.33628	-1.81328	-0.446228	-5.18095	0.984781	1.49288	3.19062	-6.61067	-9.03479	4.3711	-6.00974	4.03211	6.86661	1.40796	-5.39457	3.43743	3.6589	-5.20692	-6.26642	0.454276	-8.41073	-8.85214	3.96421
199	-4.19815	1.87473	-1.16881	-10.6651	4.67506	-7.39038	-4.54836	-7.62848	-9.56027	4.95107	0.14272	-6.9651	-0.860342	8.11159	3.69266	1.81608	0.891455	-2.17517	3.58804	-10.0481	-7.10734	-12.476	-8.7906	-0.504234	3.66021	-7.81623	4.34661	-1.82793	-0.441853	-7.27495	0.239977	1.48945	4.18406	-6.22891	-8.8746	4.28532	-6.01882	5.22352	6.79133	0.876945	-5.58058	3.32946	3.65814	-5.12161	-6.77656	1.15013	-8.25567	-8.8731	4.07639
200	-4.28346	-1.78203	-0.356702	-9.49665	4.83246	-8.29497	-4.47011	-6.8076	-6.53104	4.91817	0.139334	-6.92747	-0.856114	8.47462	3.64179	2.00749	0.887846	-2.9096	3.58556	-10.0069	-7.0935	-12.7231	-9.01936	-0.712446	4.04337	-4.38281	4.35299	-1.56342	-0.413295	-5.02672	0.778378	2.67351	3.15317	-6.46624	-9.49696	4.21809	-6.06151	3.87695	6.88533	0.84139	-5.90688	3.2177	4.46943	-4.3494	-6.27817	1.12749	-7.25837	-8.98649	4.22482
201	-4.49792	-1.06701	-1.07716	-1.60153	4.84646	-8.02101	-4.68818	-7.58296	-8.19689	4.94975	0.154463	-4.91617	-0.855873	8.57145	3.61347	1.91412	0.853208	-3.12406	3.61694	-10.0498	-6.04666	-12.4632	-8.53399	-0.275686	4.13916	-7.85854	4.23546	-1.69928	-0.414869	-8.32603	0.587788	2.55973	3.1171	-6.15515	-9.47388	4.37716	-6.10223	3.86473	6.94466	1.17129	-5.79382	5.57204	4.00418	-3.29749	-6.75934	1.05157	-7.52627	-9.05376	4.46511
202	-4.37842	1.71511	-1.10504	-1.58702	4.39476	-8.34408	-5.56051	-7.61313	-1.01384	4.7792	0.197872	-7.01889	-0.839221	8.20582	4.0814	2.02375	0.940068	-1.68331	3.59813	-10.0492	-7.08605	-12.8273	-8.49011	-0.415874	3.94606	-7.2254	4.22531	-1.49911	-0.410334	2.39845	0.236067	2.89702	3.38821	-6.47053	-9.21596	-3.42971	-6.1119	4.82531	6.80221	1.3272	-5.61197	6.99143	4.06279	-5.18524	-6.13475	1.07614	-6.99289	-8.84482	4.36801
203	-4.42448	-1.99337	-0.636258	-1.57	4.97961	-7.39558	-5.75959	-2.19329	-0.969795	4.84489	0.174971	-4.82259	-0.83148	8.49606	3.84554	1.73134	0.937973	-2.34332	3.62195	-9.99719	-6.65562	-12.4545	-8.92976	-0.569937	3.86061	-7.73137	4.21415	-1.75788	-0.413524	2.39387	0.613865	2.4405	3.3415	-6.41963	-9.47722	-3.49721	-6.05483	3.8541	6.92153	0.859618	-5.39795	5.00498	4.37873	-4.61228	-6.60315	1.32128	-7.78401	-9.05242	4.50413
204	-4.61186	1.56363	-3.66821	-1.60839	4.82102	-7.48947	-6.0951	-2.21063	-1.62225	4.83594	0.217649	-7.07504	-0.833968	8.56319	4.57842	1.82435	1.03525	-1.58937	3.61825	-10.0057	-7.02512	-12.7806	-8.95256	-0.500777	4.46845	-8.00672	4.20054	-1.59556	-0.418506	2.43628	1.07387	2.88613	3.35894	-6.42212	-9.12394	-3.2993	-5.94143	4.83211	6.668	1.30058	-5.39833	7.02129	3.92467	-2.88803	-6.35362	1.29016	-7.93646	-8.98685	4.47404
205	-4.65022	-2.0204	-3.94582	-1.55766	4.99282	-8.06553	1.65972	-2.1707	-1.02043	4.88299	0.218253	-7.14914	-0.857323	7.62924	4.30272	1.73391	0.993528	-2.16702	3.65146	-9.99918	-6.23621	-12.4367	-8.91888	-0.59351	4.23017	-6.4444	4.19085	-1.65077	-0.41639	2.42271	0.495978	2.301	3.31468	-6.31804	-9.48361	-3.28289	-5.82524	4.42931	6.60621	0.885271	-5.87492	3.11715	4.41556	-2.87303	-6.29637	1.25821	-8.60757	-8.83295	3.6479
206	-4.56674	-0.797957	-1.64158	-1.54303	4.71705	-8.36442	1.41181	-2.38973	-1.74587	4.83704	0.207595	-5.20358	-0.829012	8.51123	4.64275	1.73527	1.0306	-2.83389	3.70796	-10.0073	-6.60037	-12.4282	-8.99702	-0.306053	4.30775	-7.61889	4.26431	-1.53154	-0.419637	2.40426	0.512215	2.16166	3.32804	-6.28307	1.93899	-3.50147	-6.8393	3.8615	6.58295	1.26582	-5.84886	5.2916	3.95816	-2.95286	-6.24229	1.21809	-9.08285	-8.99448	3.8321
207	-4.43309	-0.494495	-1.79176	-1.53504	5.00001	-7.30622	0.560144	-2.12233	-1.07149	4.84975	0.206302	-7.24323	-0.870799	8.28138	4.45218	1.73253	0.979262	-2.17614	3.67178	-10.0151	-7.09224	-12.6111	-8.85223	-0.562991	-3.37479	-6.43057	4.26209	-1.49157	-0.419618	2.40093	1.19555	2.02079	3.27244	-6.64475	1.93253	-3.42211	-6.994	5.23233	6.5427	1.37153	-5.82472	7.00949	4.11655	-5.72599	-6.35154	1.19089	-9.12634	-9.05123	3.64086
208	-4.55087	-0.234502	-1.50763	-1.50855	4.79154	-8.10249	1.50522	-2.05058	-1.26953	4.85819	0.191032	-5.03894	-0.854731	7.61536	4.51994	1.72604	0.989823	-2.42988	3.75132	-10.0493	-7.13154	-12.5214	-8.95926	-0.366951	-3.44533	-8.32237	4.25096	-1.87073	-0.422247	2.44469	-4.43647	1.88969	3.29524	-6.40459	1.97161	-3.47663	-5.74249	3.84427	6.52567	0.873984	-5.41249	-1.07138	4.30935	-6.11702	-6.77627	0.681187	-8.99496	-8.81909	3.70386
209	-3.79102	2.36036	-1.42523	-1.87039	5.01316	-7.663	1.58151	-2.33465	-1.22203	4.8515	0.160654	-5.39969	-0.872164	8.55318	4.62243	1.72509	0.984671	-2.76218	3.73378	-10.0127	-6.56968	-12.4723	-8.94055	-0.654363	-3.33309	-6.48987	4.24727	-1.47221	-0.402394	2.38464	-5.53267	1.76488	3.60115	-6.31666	1.95606	-3.47029	-5.61285	4.95176	6.52318	1.37616	-5.41387	-2.13304	4.14743	-5.91741	-6.35855	0.633677	-8.80713	-9.04172	4.01324
210	-4.64009	-1.82603	-4.22755	-1.80145	4.62957	-8.15411	0.690387	-1.95108	-2.33867	4.86392	0.148858	-7.52031	-0.817449	8.34008	3.72701	1.71808	1.00624	-3.17641	3.76729	-10.0196	-7.16067	-12.6955	-9.02848	-0.272054	-3.33029	-8.1592	4.13319	-2.40306	-0.419488	2.44503	-4.53908	2.63195	3.65254	-6.2468	1.95822	-3.34447	-6.92275	4.27476	6.56219	0.923423	-5.52658	-2.11641	4.2505	-3.42921	-6.75598	0.594892	-4.69926	-8.98863	4.37435
211	-4.19099	-1.69463	-1.27281	-1.51234	4.53236	-7.46303	0.997214	-2.31175	-1.15031	4.86985	0.153014	-5.62137	-0.875752	8.48616	2.83333	1.72022	0.942154	-1.89223	-9.35815	-10.0498	-6.12992	-12.6208	-8.98572	-0.723038	-3.38217	-6.59563	4.16898	-2.35605	-0.417667	2.37735	-5.47725	2.82158	3.50435	-6.4351	1.9948	-3.51655	-7.03032	4.89836	6.61529	1.2218	-5.88706	-2.1356	4.03602	-3.2314	-6.53782	0.567401	-4.74145	-8.79784	4.20254
212	-3.98545	-1.61429	-4.49645	-1.68413	4.35058	-8.37672	0.881977	-1.87386	-1.15775	4.86658	0.148395	-7.3693	-0.804671	8.51023	3.70746	1.71829	1.10833	-2.53385	-9.34315	-10.0498	-7.14084	-12.7515	-9.02995	-0.309361	-3.43601	-8.73502	4.17647	-2.39886	-0.400172	2.44668	-5.37403	2.40821	3.55655	-6.17534	1.98405	-3.44531	-6.77893	4.65275	6.69081	0.850188	-5.70621	-2.11295	4.25656	-2.91375	-6.44223	1.0163	-4.72323	-9.00867	4.48916
213	-4.27075	2.09631	-1.11444	-1.49631	4.25592	-9.9625	1.701	-2.19158	-2.24415	4.8745	0.135016	-7.69898	-0.861015	8.38998	3.24198	1.71343	0.809941	-1.78799	-9.33249	-10.0135	-6.5497	-12.8071	-8.99407	-0.40015	-3.4556	-8.5529	4.16557	-2.06056	-0.405757	2.44465	-4.31371	2.52198	3.44129	-6.46581	1.98386	-3.48406	-6.86288	4.46346	-0.722739	1.34832	-5.54577	-2.11557	3.55716	-5.40395	-6.11661	0.928973	-4.83039	-9.03971	4.53077
214	-3.89269	-1.49473	-6.5528	-1.63688	4.43402	-6.86169	1.30403	-2.20344	-1.31399	4.8713	0.15766	-6.10846	-0.874984	7.67523	3.03688	1.71914	0.997086	-2.69327	-9.36223	-10.0505	-7.52323	-12.8096	-9.01311	-0.751381	-3.38794	-6.74335	4.14167	-2.27067	-0.426707	2.38766	-5.23759	2.88638	3.47107	-6.45866	1.99359	-3.17198	-6.77709	3.83583	-0.581123	0.961765	-5.41315	-2.13477	3.64387	-5.54094	-6.40426	0.838741	-4.97355	-9.02146	4.3828
215	-4.06638	0.0228116	-8.86197	-1.5958	4.16442	-9.49106	1.04292	-1.86486	-1.49967	4.87026	0.138414	-5.8608	-0.847989	8.55928	3.62541	1.67482	0.833289	-3.08833	-9.36304	-10.0483	-7.72016	-12.8163	-9.01981	-0.377829	-3.39265	-9.12677	4.15305	-2.16409	-0.403094	2.43019	-5.11357	2.7438	3.4045	-6.28749	1.97894	-3.51508	-6.9964	5.13553	-0.477523	1.13501	-5.40835	-1.45867	3.50991	-3.03622	-6.20442	0.994901	-4.92464	-8.77406	4.48411
216	-4.32812	-1.72814	-6.77229	-1.49006	-4.78629	-10.0491	1.6609	-1.88053	-2.43452	4.87062	0.152529	-7.91053	-0.797754	8.51312	3.4188	1.66856	0.835996	0.681757	-9.3651	-10.0112	-4.00344	-1.38499	-8.97218	-0.136969	-3.44761	-6.91905	7.34667	-1.94706	-0.423977	2.44143	-4.16816	2.8684	3.41431	-6.14574	2.00182	-3.45807	-6.41229	3.95534	-0.933898	-4.72767	-5.90333	-1.63029	3.8989	7.09754	-6.18183	0.763089	-6.98743	-9.01325	-5.17089
217	8.2323	-8.65166	-6.58355	-1.90501	-3.78082	-8.98221	1.29613	-2.18809	-1.39755	-0.539941	0.180524	-10.4328	0.84974	8.46924	0.337096	-0.303323	1.21796	0.479275	-9.37754	-9.94545	-7.19743	0.929918	-4.16815	-0.473192	-3.38949	-7.1462	7.25679	-1.47043	8.2432	2.43263	-5.04029	-6.77936	3.99586	2.46511	2.00135	-3.31895	-6.65131	3.85219	-0.977931	-4.63499	-2.42234	-1.80441	3.75199	7.09825	1.44217	-2.61638	-7.09415	-1.06714	-5.24254
218	8.26162	-6.95294	-6.83829	-1.40853	-4.72534	-9.78925	1.70067	-7.37864	-2.12769	-0.754888	0.185574	-10.2342	0.915446	7.85528	0.348714	-0.0713815	1.29155	0.68541	-9.57932	-9.84114	-4.29044	-1.09729	-4.12637	-0.142216	-3.34586	-7.05276	7.29743	-1.47151	8.17103	2.35391	-3.78945	-6.76951	4.28745	3.50197	2.00078	-3.38517	-6.13729	3.84581	-0.924946	-5.34063	-1.56981	-1.94261	3.87019	7.10307	3.76519	-2.66134	-6.72835	-2.49258	-5.35457
219	8.25202	-8.63532	-6.38897	-1.91681	-3.92139	-7.13593	0.379464	-7.75451	-1.37567	-0.132788	0.173789	-10.1738	0.648707	8.63885	0.365981	-0.304976	0.876637	0.537698	-9.37326	-9.95863	-3.24616	0.737022	-4.12727	-0.489025	-3.45686	-8.91819	7.45406	-1.46927	8.22676	2.44344	-4.9411	-6.7635	4.14834	2.51212	1.83106	-3.51671	-6.2288	5.06098	-0.929037	-4.9605	-0.601983	-2.04743	-6.55053	7.09598	2.77124	-2.67861	-6.79119	-2.75655	-5.28854
220	8.23433	-7.02471	-7.7251	-1.47497	-3.37502	-10.183	1.09822	-7.29717	-1.09708	-0.330596	0.197812	-10.4033	0.626609	8.4249	0.364762	-0.0990277	1.39763	0.676116	-9.31483	-9.82354	-7.73481	-1.23432	-4.16458	-0.27974	-3.39398	-9.07426	7.39664	-1.47257	8.3966	2.4385	-3.98809	-6.80251	4.44528	3.59581	1.99101	-3.20359	-6.09054	3.85613	-0.928067	-4.53615	-2.23829	-2.812	-2.37578	7.09273	4.00089	-2.67992	-6.88185	-3.01878	-5.40578
221	8.2657	-7.20906	-6.00477	-1.44394	-4.6363	-10.0901	1.20464	-7.24408	-2.11082	-1.18523	0.194602	-10.331	0.924882	8.52386	0.359544	-0.313653	1.46853	0.574889	-9.63874	-8.70069	-3.47426	0.895819	-4.16967	-0.41162	-3.40026	-7.14337	7.21599	-1.47263	8.12064	2.4217	-4.88525	-6.79247	4.38589	2.59826	1.82745	-3.36408	-6.20525	4.99842	-0.847742	-5.41231	-1.68286	-1.2979	-2.43131	7.09682	2.57667	-2.63473	-5.72838	-1.13517	-5.46921
222	8.30389	-8.62448	-6.27371	-1.20773	-3.48274	-7.41785	1.45836	-7.59965	-1.46602	-1.57974	0.205354	-10.3251	0.673586	8.59207	0.354112	-0.125468	0.932104	0.652376	-9.32967	-9.92079	-7.73451	0.937532	-4.12709	-0.424784	-3.3366	-7.09376	7.87649	-1.46266	8.31915	2.45564	-3.32812	-6.78637	4.39649	3.69949	2.02082	-3.37251	-6.08136	4.13358	-0.90862	-5.09879	-0.694082	-2.63838	-2.54032	7.10289	1.49724	-2.51614	-7.37878	-6.01743	-5.52564
223	8.35237	-8.33713	-7.25438	-1.82384	-4.53451	-10.195	0.44752	-7.64993	-1.02989	-1.39078	0.214971	-10.4087	0.870668	7.98621	0.35147	-0.178482	1.52544	0.5906	-9.64422	-9.82732	-3.72652	-0.977182	-4.13549	4.79184	-3.34271	-9.04655	7.81752	-1.45969	8.25121	2.36608	-4.87607	-6.77404	4.44128	2.56431	1.83796	-3.18723	7.2603	-8.90399	-0.515906	-4.97112	-2.02882	-1.14651	-2.80643	5.06647	2.52719	-2.57532	-5.1972	-1.55565	-5.57533
224	8.38741	-7.62309	-6.99877	-1.87341	-3.62645	-10.3706	1.59115	-7.18396	-1.08865	-0.967906	0.222376	-10.4113	0.92992	8.5416	0.352152	-0.170664	0.993194	0.581829	-9.30581	-8.84211	-6.7099	0.83191	-4.12548	4.38115	-3.41083	-9.09737	8.04705	-1.4645	8.31038	2.41077	-3.56849	-6.74876	4.17148	2.37928	1.86049	-3.5164	7.355	-8.9528	-0.647416	-4.92522	-0.596037	-2.98092	-2.471	4.58535	3.90086	-2.44365	-7.39551	-3.30702	-5.68112
225	8.40588	-8.55518	-7.48628	-1.32221	-3.31688	-9.17824	1.11781	-7.62974	-2.16417	-1.85227	0.217037	-10.413	0.898101	8.51799	0.753391	-0.109691	0.767278	0.653243	-9.64078	-9.95771	-6.83647	-0.875342	-4.12448	4.68524	-3.35852	-7.03015	7.99174	-1.46232	8.1827	2.47713	-2.81283	-6.74825	4.40169	3.19479	2.01098	-3.26039	7.50136	-8.25926	-0.751614	-4.66344	-1.7123	-3.15923	-2.38635	4.97032	1.63114	-2.36255	-5.29776	-2.25717	-5.63242
226	8.43194	-7.83612	-7.82225	-1.76608	-4.38531	-7.99183	3.32632	-7.12345	-2.00386	-1.95524	0.216827	-6.67351	0.805392	8.45274	0.862074	-0.557837	-9.59007	0.555498	-9.31177	-8.97334	-6.61007	-0.78291	-4.16511	4.83942	-3.35915	-9.48964	7.93446	-1.46847	8.34892	2.37254	-4.88734	-6.74894	4.29408	2.31911	1.85675	-3.41119	7.66851	-8.28506	-0.416356	-5.41507	-1.79621	-1.02577	-2.35307	5.14245	4.02973	-2.88048	-7.19417	-3.58832	-5.72797
227	8.45303	-8.05679	-6.15311	-1.66635	-4.44447	-9.46948	3.33964	-7.58146	-0.953485	-1.73029	0.217109	-6.16683	0.934675	7.74946	0.61963	-0.0707121	-9.00239	0.62045	-9.63067	-9.84902	-3.02459	0.958355	-4.16417	4.34792	-3.40684	-9.21127	7.57085	-1.46554	8.32262	2.42733	-3.07663	-6.75054	4.41928	3.28777	1.87945	-3.54356	7.79976	-8.38094	-0.384218	-4.72324	-1.75358	-0.919297	-2.76879	4.97301	2.48679	-2.89371	-5.16103	-1.50126	-5.80308
228	8.48815	-8.44108	-7.97132	-1.7308	-3.32365	-10.1334	3.32525	-7.07662	-1.94151	-2.23157	0.199055	-6.33591	0.86249	-3.72686	0.512803	-0.632806	-8.79026	0.501533	-9.31964	-9.83115	-7.37327	0.937507	-4.165	4.71781	-3.41962	-7.01746	7.51205	-1.46877	8.32815	2.36279	-4.91718	-6.75938	3.88383	3.38928	2.03381	-3.51101	7.85589	-8.31	-0.376988	-4.77031	-0.588044	-0.824021	-2.64769	4.68792	2.05441	-2.46492	-5.50137	-1.2279	-5.85741
229	8.4697	-8.55186	-7.68427	-1.69432	-4.3731	-7.70155	3.33933	-7.5595	-1.05992	-2.17636	0.227891	-6.13714	0.576205	-2.95065	0.438263	-0.415658	-9.41205	0.44543	-9.6178	-9.82922	-2.82097	-0.699594	-4.16369	4.85596	-3.35402	-7.06239	7.75945	-1.46863	8.26175	2.48421	-2.26501	-6.75423	4.38034	2.43386	1.89629	-3.24497	7.81599	-8.41009	-0.416055	-4.66746	-0.704399	-0.76691	-2.68567	4.9669	1.83271	-2.51478	-7.27677	-2.01805	-5.89072
230	8.50889	-8.17461	-8.14864	-1.64411	-4.40301	-10.1241	3.31084	-7.06462	-2.07196	-2.04628	-0.4599	-6.74857	0.8919	-2.75935	0.352754	-0.291732	-9.91551	0.547647	-9.32346	-9.10469	-7.00327	0.949206	-4.16703	4.75417	-3.34984	-9.42014	7.69381	-1.45989	8.16469	2.4179	-4.98443	-6.74953	4.02413	2.91929	2.02013	-3.51447	7.68644	-8.34151	-1.40691	-4.82789	-1.37087	-2.10379	-2.85181	4.96438	2.35158	-2.57365	-7.3417	-1.80248	-5.9027
231	8.52784	-8.4223	-6.09584	-1.6288	-4.39861	-9.33284	3.31039	-7.52301	-0.994586	-2.1154	-0.466922	-6.1417	0.603973	-2.85618	0.387869	-0.639217	-9.20985	0.407679	-9.35498	-9.84068	-6.32945	-0.623121	-4.16804	4.88065	-3.4156	-7.42026	7.63372	-1.46038	8.24034	2.36293	-2.53985	-6.74828	4.30469	2.21471	1.86146	-3.22468	7.48886	-8.31501	-1.38679	-5.34775	-0.881641	-2.11065	-2.84153	5.17896	3.88596	-2.46277	-6.65354	-1.36308	-5.89207
232	8.52971	-8.46917	-7.97314	5.89547	-3.37094	-9.6224	3.31903	-7.07029	-9.61746	-2.19556	-0.463842	-6.36807	0.952025	-4.85836	0.338652	-0.217239	-10.0436	0.439929	-9.64544	-9.25759	-6.49177	0.987559	-4.17032	4.32273	-3.37915	4.74129	8.26416	-1.49317	8.21097	2.48366	-5.02624	-6.76083	4.19393	3.9924	1.89317	-3.39725	7.28004	-8.27483	-1.3272	-4.86715	-2.58983	-0.847558	-3.12973	4.65883	3.60873	-2.34575	-7.34621	-4.42678	-5.85494
233	8.52423	-8.01782	-6.03226	6.85061	-4.84647	-8.2848	3.34652	-7.08574	-9.58236	-2.25171	-0.45608	-6.1372	0.777174	-3.63841	0.337062	-0.584059	-9.77267	0.564308	-9.32641	-9.83903	-5.98262	-0.545747	-4.16572	4.77884	-3.43005	4.59159	8.29075	-1.45847	8.40696	-7.82275	-5.57631	-6.75903	3.59329	3.03644	1.93398	-2.81787	7.12185	-8.84283	-1.10832	-4.61219	-1.5684	-2.16812	-2.67147	4.96303	2.34846	-2.13494	-7.38632	-3.87315	-5.14149
234	8.50533	-7.90194	-8.1673	5.15418	-4.24546	-10.1393	3.30949	-7.47009	-9.57513	1.36959	-0.460238	-6.15317	0.951668	-2.97887	0.910855	-0.195924	-10.1632	0.330288	-9.64127	-9.76372	-5.7864	0.958242	-4.16048	4.29585	-3.36639	5.19635	8.31259	-1.49649	8.34305	-8.03305	-4.98026	-6.8166	3.44231	3.08485	2.03907	-2.55562	7.05694	-8.2583	-1.23008	-5.23457	-0.64239	-0.925934	-2.45707	4.88937	1.92789	-2.2227	-6.82193	-1.74941	-5.73586
235	8.47824	-8.25967	-8.30221	5.84966	-4.75328	-9.77461	3.33558	-3.42764	-9.6425	-2.2625	-0.472735	-6.55603	0.750072	-2.78936	0.796095	-0.417212	-10.1668	0.545524	-9.35784	-9.71367	-6.18083	-0.470628	-4.15727	4.93714	-3.42724	4.42852	8.32653	-1.45896	8.40965	-7.93417	-5.61805	-6.75847	3.76345	2.2766	2.03447	-2.59737	7.09552	-8.35098	-0.97444	-5.16593	-0.77218	-0.794247	-2.90685	4.70502	3.96636	-2.84262	-7.03842	-4.70624	-5.80772
236	8.35202	-8.63201	-7.32814	5.23229	-4.07592	-8.57108	3.35549	-4.08008	-9.62196	1.37786	-0.451272	-6.12224	0.934256	-2.99531	1.05799	-0.441828	-8.27383	0.409592	-9.32852	-9.86699	-5.10454	-0.304207	-4.15079	4.96083	-3.43827	4.90177	8.33709	-1.49997	8.27147	-7.57918	-4.88008	-6.81486	4.10342	3.13028	1.91512	-2.16175	7.21741	-8.37072	-0.847687	-4.72979	-1.56966	-2.30759	-3.03377	4.77863	3.9184	-2.77568	-7.27329	-1.38912	-4.95844
237	8.53076	-8.24292	-6.25224	5.76187	-4.64881	-6.31545	3.33348	-4.34657	-9.50389	1.35206	-0.453935	-6.2906	0.76658	-3.54439	0.991539	-0.503604	-8.34672	0.36441	-9.35851	-9.57947	-7.74441	-0.392225	-4.15662	4.58329	-3.37096	4.90413	8.09806	-1.50021	8.27081	-7.59478	-4.75733	-6.75753	3.93778	2.25124	5.48974	-2.5084	7.48217	-9.01186	-0.969365	-5.09748	-2.5669	-1.02531	-2.83228	4.97244	3.45308	-2.68588	-5.96484	-1.93737	-4.88785
238	7.94624	-8.64649	-7.09655	5.65335	-4.12889	-10.2615	3.30809	-4.40577	-9.5891	1.28574	-0.462661	-6.60695	0.832403	-2.76109	1.04731	-0.526913	-10.1808	0.613745	-9.65299	-9.8393	-7.73756	1.00799	-4.15967	4.26154	-2.0641	5.09911	8.14479	-1.45978	8.30417	-7.64489	-4.64612	-6.75578	4.34205	2.6191	4.63103	-2.12466	7.52678	-8.26429	-0.995824	-5.06242	-0.881594	-2.47444	-2.78035	5.01098	2.15212	-2.58573	-6.45149	-1.23213	-5.04395
239	7.99388	-7.75136	-6.19423	5.80999	-4.50153	-8.87105	3.34837	-4.16124	-9.63685	1.31891	-0.465413	-6.18101	0.947978	-4.32197	1.03699	-0.343284	-8.45843	0.611913	-9.36048	-9.41355	-5.57757	0.182319	-4.1638	4.7802	2.76351	4.19425	8.19057	-1.49887	8.1465	-7.73851	-9.26479	-6.75434	4.23446	3.78958	5.23271	-2.85817	7.37805	-8.39684	-1.05596	-4.95856	-0.853094	7.95556	-2.47041	4.73261	2.24159	-2.00372	-7.17322	-2.12755	-4.83715
240	8.02552	-8.70332	-8.47249	5.0461	-4.07003	-9.88905	3.30641	-3.46919	-9.55151	1.20673	-0.461119	-6.11369	0.937008	-3.43407	0.952959	-0.490805	-10.1686	0.632899	-9.32551	-9.85368	-7.73228	1.03722	-4.16297	4.54839	0.112633	5.27961	8.22952	-1.47405	8.20697	-8.14708	-9.19639	-6.75251	3.67526	2.07793	5.76536	-2.89908	7.52412	-8.69399	-1.14971	-4.49913	-0.935785	7.23922	-2.53991	4.93309	1.54472	-2.08261	-6.21808	-4.97622	-5.65556
241	8.17695	-7.54282	-8.66463	5.90721	-4.35021	-9.179	3.35278	-4.4675	-9.55834	1.25354	-0.468392	-6.30838	0.789875	-2.7935	1.01392	-0.245431	-8.60556	0.55338	-9.64745	-9.89672	-4.84872	-0.0827024	-4.14312	4.60517	2.8995	4.29006	8.2692	-1.4765	8.42759	-7.61542	-9.20774	-6.80884	3.83362	2.66366	4.49913	-2.29611	7.53297	-8.24838	-1.24955	-5.09373	-1.34946	8.0404	-2.54752	4.84622	3.73911	-2.17649	-6.74329	-1.24179	-4.80544
242	8.18857	-8.30048	-6.17541	5.28715	-4.0802	-6.58702	3.31392	-4.03386	-9.58206	0.94628	-0.451478	-6.12861	0.702833	-3.01018	0.344093	-0.34075	-10.2028	0.333552	7.35271	-9.84866	-4.57366	-0.196228	-4.14618	4.78514	-2.58001	4.23249	8.33759	-1.47529	8.30933	-7.55436	-10.198	-6.81293	3.40227	3.86814	8.12558	-2.73887	7.81006	-8.32515	-1.33606	-5.20633	-2.57428	7.49869	-2.66019	4.94555	3.29684	-2.27012	-6.87153	-2.299	-4.83865
243	8.13123	-7.2629	-7.52715	5.2043	-4.14363	-10.2318	3.28904	-4.22891	-9.63801	1.10214	-0.45342	-6.51575	0.82499	-4.58617	0.348303	9.00425	-8.29973	0.562981	4.23103	-9.90613	-5.34884	0.326605	-4.1388	4.90953	-0.0277779	5.45049	8.33813	-1.48081	8.3686	-7.58403	-9.21011	-6.80616	3.52591	2.13231	4.40007	-2.25042	7.65128	-8.22506	-1.38837	-4.52466	-0.762846	6.97219	-2.43308	4.9596	2.95576	-1.92957	-6.70402	-5.23257	-4.80913
244	8.07272	-8.51444	0.934172	5.42441	-4.1163	1.74382	3.31189	-4.29283	-9.60412	0.525644	-0.463686	-6.21734	0.949373	-4.08735	0.435187	9.04858	-8.34326	0.493725	7.21212	-9.75468	-7.74037	0.0469068	-4.14085	4.21879	-0.242798	4.2103	8.31437	-1.4764	8.33533	-7.58008	-9.25606	-6.80718	3.25746	2.7712	7.70746	-2.68795	8.05869	-8.78804	0.0173968	-4.82745	-0.933613	8.08757	-2.86087	4.95263	1.71395	-2.04281	-6.99336	-1.26616	-4.89443
245	8.18264	-8.381	2.5448	5.36242	-4.03966	2.45671	3.3043	-3.54752	-9.61912	0.74667	-0.462353	-6.26688	0.725238	-2.8138	0.368036	9.08528	-10.2267	0.585907	7.06317	-9.8175	-7.43242	0.614858	-4.14813	4.51298	-2.32886	5.54566	8.32579	-1.47852	8.2732	-7.68078	-9.26906	-6.81349	3.3087	3.94193	5.08914	-3.10836	7.82018	-8.34128	-0.0786296	-5.22539	-1.14095	8.05973	-2.58433	3.79484	1.45933	-1.98003	-6.83747	-5.48958	-5.07091
246	8.12935	-8.61073	1.24381	5.45585	-3.90506	0.843433	3.31958	-4.52478	-9.63279	0.0749761	-0.452196	-6.12217	0.841958	-3.01816	0.667245	8.89415	-10.2235	0.41728	6.90049	-9.89595	-6.57978	0.474328	-4.14981	4.82591	1.93799	4.11922	8.2935	-1.48333	8.20624	-8.14687	-10.1721	-6.81468	3.32808	2.17708	4.81722	-2.77681	7.96261	-8.23263	3.50339	-5.18321	-1.4258	7.906	-2.72152	5.16607	2.34935	-1.92519	-6.96797	-1.15633	-4.96883
247	8.01436	-7.4186	1.11107	5.88223	-2.62151	1.75487	3.31165	-3.7223	-9.64222	0.298924	-0.465882	-6.47962	0.751625	-3.29466	0.548406	8.92353	-8.36211	3.48106	6.74492	-9.74105	-6.78585	-4.74455	-4.14726	4.63344	-0.141676	5.61644	4.13569	-1.48965	8.34963	-8.25058	-9.49625	-6.81046	3.26362	3.98359	4.64165	-1.8951	7.65022	-8.44421	0.174489	-4.41418	-2.52437	7.57929	-3.04237	4.02998	3.12137	-1.94201	7.30066	-5.75049	0.165458
248	-9.77597	-2.14608	0.524391	5.00367	-2.86773	0.948095	3.28301	-3.65078	-9.61487	-9.91499	-0.463595	-6.25002	-2.42387	-3.89317	-8.79128	8.94693	-8.30525	3.98658	6.57983	-5.42439	-7.29235	-4.77019	9.75751	4.20518	2.18495	4.20665	4.14071	-9.00858	-8.18379	-7.55349	-9.3516	9.07214	-7.8751	5.70979	7.90667	-3.16078	8.01959	-8.30205	3.36539	-3.43072	5.37891	6.49798	-2.97497	4.9722	6.42946	7.25808	7.32209	6.43011	0.0799437
249	-9.69866	-1.51363	0.732408	6.12154	-3.88738	2.54905	3.34743	-3.875	-9.61953	-10.0026	-0.463098	-6.26024	-2.42821	-2.88729	-8.9502	8.96898	-10.2271	3.52568	6.41209	-5.01073	-6.65357	-4.69049	9.90483	4.47349	-0.323206	5.6665	4.13041	-8.99513	-8.17861	-7.51898	-10.0522	9.0691	-8.29383	5.89141	4.94333	-2.20446	7.71454	-8.21777	3.48924	-4.33721	4.65426	7.77509	-2.97426	4.2488	6.42318	7.2513	7.3981	4.18196	-0.00745548
250	-9.40316	-1.94904	0.555684	4.77606	-3.29286	1.09272	3.30815	-4.53974	-9.59919	-9.59384	-0.459839	-6.8372	-2.43097	-2.98592	-9.11452	8.76397	-10.227	3.9456	6.24152	-5.62814	-6.62305	-4.79541	9.688	4.82339	-2.83137	5.6958	4.15338	-8.99568	-8.17079	-8.20306	-9.43817	9.00928	-8.28959	5.55241	5.02539	-2.64253	7.90077	-8.50822	0.182422	-3.78324	5.25889	8.07897	-3.04447	4.51498	6.4144	7.24404	7.5495	6.64727	-0.0898973
251	-9.45407	-1.96502	2.46046	6.36213	-3.91877	2.59452	3.31779	-4.54775	-9.63706	-9.45087	-0.451864	-6.13705	-2.42982	-2.9413	-9.9591	8.82265	-10.2267	3.83299	6.07943	-5.22369	-7.77916	-4.71372	9.98475	4.9829	-0.421221	3.80169	4.14858	-8.86218	-7.75436	-7.07229	-9.65754	9.06469	-7.79591	5.75207	7.52816	-2.01485	7.51404	-8.3253	0.0962519	-4.45504	4.6968	8.05431	5.36018	4.94896	6.41214	7.23887	7.32026	6.90579	0.475308
252	-9.37835	-1.45647	1.54733	4.83757	-2.38603	1.78214	3.27947	-3.75979	-9.64505	-7.23007	-0.467447	-6.40536	-2.42845	-3.80978	-9.28227	8.84832	-10.2088	3.81747	5.9049	-6.59218	-7.62069	-4.84814	9.84949	4.65536	2.59756	5.6895	4.12371	-9.0065	-7.71714	-7.02326	-9.29641	9.01085	-8.05289	5.40631	4.78706	-2.38252	7.34887	-8.22912	3.20182	-3.62747	5.47735	7.65037	3.81824	4.95548	6.39388	7.24979	8.10652	4.00953	0.459032
253	-9.69651	-2.11253	1.44228	5.58865	-3.89299	0.642428	3.31552	-3.93705	-9.64146	-9.77042	-0.449216	-6.19451	-2.43078	-2.84019	-9.69499	8.87217	-8.21861	3.62798	7.63176	-6.41018	-6.54823	-4.87464	9.98639	4.42443	-0.653505	5.64719	4.20035	-9.01545	-7.74504	-7.02286	-9.65605	9.05783	-8.23408	5.31622	4.41913	-1.97588	7.25547	-8.59538	0.933716	-4.4574	4.71154	6.70468	4.67543	4.40574	6.4634	7.24133	8.26619	6.20553	0.448344
254	-9.6379	-1.95994	1.83834	5.54113	-3.09385	1.28928	3.29481	-3.61109	-9.53665	-9.65189	-0.460771	-6.14197	-2.42722	-3.00178	-9.38712	8.7107	-10.2159	3.72579	5.67771	-6.76894	-6.86071	-4.81882	9.73943	-3.31593	2.40544	3.92298	4.19284	-8.93892	-7.79757	-7.06127	-9.88063	9.07335	-7.96316	5.59569	6.83456	-3.02675	1.25359	-3.20063	1.08703	-3.9254	5.45484	7.99558	5.55533	-8.12788	6.34061	7.23678	7.92243	7.76728	0.501579
255	-9.53018	-1.99801	2.42316	6.58326	-2.18737	2.43101	3.30882	-4.55819	-9.61921	-7.47611	-0.456841	-6.44079	-2.43219	-3.16378	-9.4463	8.73034	-8.24173	3.82897	7.5884	-5.84026	-6.68485	-4.91582	9.88001	-3.91314	1.4106	4.0127	4.21067	-8.75287	-7.79818	-7.49494	-9.1723	9.0149	-8.27931	5.85335	7.31421	-3.06767	1.21436	-4.34002	1.24424	-4.24026	4.69548	7.57844	4.34661	-6.82644	6.3371	7.23989	7.72426	3.57897	0.321742
256	-9.75165	-2.11513	2.40432	5.64364	-3.8941	1.85473	3.27663	-3.85757	-9.64323	-9.26646	-0.466513	-6.22829	-2.43114	-2.91993	-9.83499	8.74082	-1.48493	3.80085	5.44021	-6.23317	-8.34673	-4.89655	9.68498	-1.93379	-0.52587	3.14833	4.20621	-8.89191	-7.65655	-7.30914	-9.80914	9.05325	-8.69048	5.93188	5.2487	-1.93651	1.1614	-2.66092	1.39605	-4.2608	5.46274	6.19578	5.66369	-6.97416	6.34327	7.23923	-3.71958	7.13128	0.326466
257	-9.7705	-2.17655	1.33966	6.74555	-3.43603	0.686781	-8.68276	-3.55287	-9.64662	-10.0576	-0.450442	-5.92214	-2.42887	-3.95436	-9.55688	8.7947	-1.51043	3.88248	7.53435	-6.03823	-7.02209	-4.50435	9.99938	-3.9441	1.16384	5.56796	4.16901	-8.9478	-7.75651	-7.16045	-9.69675	9.01603	-8.18119	5.69526	5.21561	-2.33942	1.19712	-0.764969	0.391564	-3.08485	4.64541	6.36569	3.78892	-7.4441	6.45676	7.02505	-1.96538	7.35264	0.354575
258	-9.7481	-1.93393	2.40832	4.87628	-3.82363	1.81693	-9.81865	-4.51949	-9.56761	-9.94123	-0.455701	-7.18756	-2.42765	-3.03835	-8.65388	8.64997	-1.51425	3.67376	5.20948	-7.68214	-7.20124	-4.48496	9.99141	-3.56997	-0.957373	3.60476	4.15966	-8.85123	-7.68252	-7.97196	-9.50796	9.078	-8.14061	5.93502	7.08934	-2.46374	0.845154	-3.12677	0.582757	-4.2817	4.6028	7.61125	3.77917	-7.59116	6.44804	7.27295	-2.39284	3.87616	0.368521
259	-8.6365	-2.12269	2.44688	6.81466	-3.90639	1.52895	-9.60383	-3.95832	-9.01649	-8.95475	-0.455035	-4.85399	-2.41031	1.58456	-0.64859	8.62755	-1.50836	3.93413	7.45244	-7.27504	-7.94568	-4.5564	9.69963	-1.85067	-0.790442	5.45683	4.18789	-8.75407	-8.01036	-7.72661	-9.10723	9.01862	-8.41224	5.84904	4.52194	-2.09141	1.17453	-0.561255	0.756218	-3.242	5.28863	6.2721	6.0452	-7.11655	6.43697	7.26283	-2.36989	5.99083	0.389988
260	-7.35073	-1.57039	2.50117	4.96383	-1.94469	1.92531	-8.79313	-4.03926	-8.21113	-10.0528	-0.455261	-6.6433	-2.43154	-0.129845	-0.616096	9.09272	-1.51139	3.94627	4.76582	-7.72976	-6.5911	-4.53188	9.8661	-3.80105	1.67676	5.32644	4.1851	-8.9631	-7.90815	-7.12797	-9.81725	9.07493	-9.0836	5.97298	6.31518	-2.93816	1.29264	-4.3113	2.51045	-4.24705	4.57229	7.65779	4.82054	-7.82601	6.44238	7.26098	-1.89115	3.7234	0.396744
261	-5.81926	-1.9805	1.39284	5.71191	-3.56885	0.70354	-9.61673	-4.45451	-7.25223	-9.09084	-9.87183	-4.92089	-2.41388	-3.01254	-0.596794	8.68038	-1.55194	3.38908	4.98852	-7.29811	-7.12591	-4.62216	9.71893	-3.89992	-1.34746	3.38067	4.17792	-9.00027	-8.15404	-7.19722	-9.52676	9.02886	-8.16364	5.95703	4.33959	-2.05396	1.15075	-2.37357	2.3586	-4.28799	5.4018	7.75364	5.4502	-7.86975	6.47251	7.07848	-2.05843	7.5677	0.411088
262	-5.89607	-2.18043	2.29342	-10.6017	-3.87343	0.710344	-8.87811	-3.48276	-6.37723	-10.0527	-9.9227	-5.69238	-2.4303	-2.02024	-0.579857	9.15184	-1.49629	3.54491	4.55323	-9.10349	-8.12091	-4.57569	9.6332	-1.69673	0.483812	5.05117	4.26297	-9.02019	-8.1167	-7.26472	-9.44104	9.07444	-8.95593	5.49833	6.57478	-2.41968	0.716345	-4.2489	2.20469	-4.44413	4.55801	8.2201	3.83708	-7.61796	6.36948	7.0919	-3.53699	5.78417	0.420028
263	-6.01224	-1.77003	2.13725	-10.5705	-3.91836	1.7822	-8.69371	-4.14116	-9.2458	-9.09889	-9.96597	-7.09978	-2.43229	-3.16914	-0.564006	9.18245	-1.54913	3.46082	4.18619	-7.65126	-6.69778	-4.59713	9.9976	-3.95121	-1.13586	-9.31184	4.2713	-9.03204	-7.67941	-7.32922	-9.38491	9.02818	-8.12017	5.36917	5.11454	-2.98073	1.30626	-3.54176	1.88857	-4.26044	4.55177	8.16577	4.11342	-8.65853	6.48979	7.11848	-2.4468	7.497	0.424621
264	-7.29843	-2.13072	1.93165	-2.6106	-3.60639	2.04306	-9.51273	-4.42576	-8.07083	-8.83291	-9.39395	-6.64354	-2.41935	-0.351931	-0.543232	9.17401	-1.45881	3.8139	4.36246	-8.95231	-6.76818	-4.66981	9.88674	-1.45999	0.283264	-8.64418	4.27751	-9.00375	-7.53315	-3.45127	-9.90464	9.06755	-8.21529	5.7663	5.21387	-3.76091	1.12538	-3.10809	2.03909	-4.47912	4.56481	7.72153	5.35892	-6.54253	6.35984	7.11171	-2.55291	5.56317	0.432465
265	-8.63368	-1.29797	2.45219	-2.06707	-3.72296	2.03755	-9.02643	-3.43068	-7.4144	-8.81181	-9.99012	-6.37048	-2.41784	-3.09953	-0.463211	9.17962	-1.51326	3.51685	3.90748	-7.34708	-6.91755	-4.64686	9.7883	-3.88259	-1.81869	-8.45343	4.28535	-9.01577	-7.66739	-2.74593	-10.1196	9.07996	-9.08719	5.24591	4.35409	-3.15777	1.30148	-2.95293	1.71972	-4.38492	4.58501	6.167	4.51813	-8.63526	6.4781	7.03587	-1.92811	3.40359	0.434494
266	-8.65524	-2.01117	2.4458	-2.61664	-3.93214	0.707627	-9.05261	0.534729	-6.50042	-8.87246	-9.34185	-7.00274	-2.42841	-2.41604	-0.52405	9.16253	-1.47333	3.91585	4.02926	-7.70524	-8.26074	-4.25315	9.66021	-2.32211	0.935223	-9.40849	4.29525	-9.00214	-7.53654	-2.15811	-9.65532	9.04219	-8.03567	5.9159	6.03953	-3.40112	1.28461	-4.38127	1.56231	-4.4876	4.55663	6.16232	5.27567	-8.07856	6.34897	7.03596	-3.89379	5.31645	0.44242
267	-7.30827	-1.92882	2.38978	-2.47602	-3.75986	0.729262	-9.35487	0.617782	-8.84135	-9.65905	-9.28392	-4.89282	-2.41908	1.06586	-0.492215	9.18409	-1.48074	3.41079	3.82038	-8.84377	-3.6214	-4.30368	9.98066	-2.24425	0.70329	-9.44469	4.21945	-9.02229	-7.61883	-3.86437	-9.27904	9.07827	-8.26286	5.67578	4.33363	-3.79526	0.953018	-3.24191	3.11191	-4.41725	4.22684	8.15996	4.0153	-8.53243	6.36016	7.04659	-2.5021	7.54752	0.181989
268	-6.12393	-2.33877	1.0811	-2.21164	-3.92907	1.84012	-8.92113	1.25614	-7.11175	-8.8857	-9.84652	-6.70539	-2.42976	-0.55724	-0.775341	9.21429	-1.4948	3.68049	3.79867	-7.27797	-3.58987	-4.27637	9.91835	-1.18814	-1.5653	-8.85054	4.22918	-9.01713	-7.6581	-2.44805	-9.98778	9.04378	-9.08859	5.52457	9.40073	-3.8259	1.10243	-0.410626	3.15217	-4.30825	4.79326	6.18071	3.91303	-8.33385	6.33844	7.05264	-1.87145	3.25203	0.226655
269	-7.50084	-2.04987	0.907709	-2.27249	-3.84882	2.17876	-9.44551	0.817753	-9.38204	-9.37919	-10.0104	-6.93465	-2.42911	1.32311	-0.768767	9.21507	-1.46909	3.80586	3.7819	-8.70973	-2.64167	-4.34156	9.86344	-3.87759	0.26793	-9.43192	4.23681	-9.0246	-7.55412	-3.64807	-4.43068	9.0372	-7.9449	5.83719	9.71588	-3.43793	1.30061	-1.50445	3.28641	-4.34616	4.80315	7.83504	4.21913	-6.70282	6.51284	7.06642	-4.06775	7.50758	0.181644
270	-6.25838	-1.65899	1.68776	-2.60262	-3.88737	2.55224	-9.85322	0.836434	-8.48273	-8.83245	-10.0312	-6.14535	-2.42962	-2.51474	-0.754989	9.14074	-1.5082	3.71103	3.96455	-7.26248	-3.52838	-4.37367	9.61725	-4.01572	-0.894541	-9.37834	4.24487	-9.00639	-7.61802	-1.85955	-3.52522	9.07878	-9.05573	5.33185	9.79904	-3.12388	1.0756	-3.921	3.26259	-4.46236	4.35519	-4.43265	6.39827	-8.31115	6.6491	7.18853	-2.47043	5.04992	0.197562
271	-6.42455	-1.91403	0.727695	-2.4618	-3.89335	0.775787	-8.9682	0.437084	-6.27612	-8.248	-9.81824	-4.85304	-2.43008	-0.767615	-0.742677	9.18459	-1.51729	3.54707	3.85947	-8.56893	-3.58805	-4.39812	9.6994	-2.47204	2.3512	-9.08377	4.25429	-9.02787	-7.67495	-2.99648	-3.50978	9.07386	-7.95706	5.45699	9.92475	-3.68149	1.04268	-4.10369	3.03769	-4.3104	4.66384	-4.45827	6.4986	-6.59914	6.37737	7.21136	-2.38328	3.08967	0.249308
272	-7.64217	-2.16474	1.70131	-2.50485	-3.92856	1.76946	-9.12644	1.05257	-8.31971	-9.09316	-9.82628	-6.81626	-2.42821	-3.19367	-0.735049	9.11437	-1.48068	3.52344	4.08902	-7.25289	-2.78768	-4.41847	9.84117	-2.15881	2.21244	-9.454	4.34589	-9.01749	-7.60473	-3.8617	-3.57353	9.05061	-7.84021	5.34353	9.06604	-3.26833	1.05119	-1.23864	2.8279	-4.39282	4.61233	-4.40646	5.41841	-8.50551	6.54241	7.22632	-2.06272	2.92244	0.271525
273	-7.42102	-2.09156	1.47105	-2.64324	-3.88928	2.32069	-9.34322	0.580458	-9.06707	-7.73242	-9.23243	-6.82857	-2.42909	-2.23548	-0.696822	9.10961	-1.38068	3.806	0.536194	-7.26307	-2.08414	-4.42875	9.70802	-3.87528	-0.015384	-9.40963	4.31827	-9.01824	-7.6552	-2.86346	-4.36298	9.07396	-9.0545	5.42308	9.21859	-2.9217	1.27161	-4.10353	2.65306	-4.07971	4.47128	-4.46574	5.4533	-6.60709	6.37487	7.23627	-3.00443	7.51303	0.267322
274	-8.17413	-1.9164	1.26077	-2.33257	-3.53353	2.26247	-9.49449	0.857006	-6.82491	-8.96631	-9.18233	-6.92753	-2.42947	-3.12146	-0.718263	-6.0358	-1.39766	3.57444	0.58988	-7.97789	-3.68728	-4.44623	9.97283	-3.97895	2.02426	-9.32801	4.30682	-3.17532	-7.63369	-3.60492	-4.51235	9.048	-8.09447	5.26736	10.2565	-3.31277	1.0361	-3.7278	0.0720588	-4.2562	5.14448	-4.45253	5.44618	-6.70984	6.38577	7.13476	-4.40062	4.55996	0.283135
275	-6.58893	-2.17561	-8.77599	-2.30543	-3.68357	-10.495	-9.23783	0.360561	-7.90056	-8.53458	-10.0698	-6.96686	-2.42871	-0.99093	-0.669189	-6.09271	-1.67986	3.64398	0.545251	-7.4026	-3.6103	-4.4707	9.9536	-0.903143	-1.29968	-7.70089	4.328	-3.12269	-7.55892	-3.27069	-3.53186	9.04218	-7.74111	5.31303	-7.24956	-3.22857	1.03055	-0.988995	0.0361817	-4.29728	5.10878	-4.35743	5.83939	-6.54887	6.58241	7.15114	-2.5153	4.78805	0.299526
276	-6.75772	-1.9095	-8.12164	-2.49111	-3.92459	-10.4605	-8.99365	0.44386	-6.13909	-9.40484	-9.7544	-5.27919	-2.43183	-2.54945	-0.862233	-6.41573	-1.58244	3.49881	0.589263	-8.14137	-2.25141	-4.97893	9.77324	-2.07231	1.49834	-9.25936	4.34281	-3.17183	-7.71581	-3.33141	-3.60451	9.07409	-7.82635	5.36033	-7.04474	-2.89773	1.24426	-3.82758	-0.00248623	-4.24389	4.57674	-4.3603	5.13142	-7.23451	6.3726	7.16073	-3.17545	7.59281	0.287606
277	-5.62749	-1.39068	-10.0698	-2.52899	6.25023	-10.484	-9.57619	0.647814	-6.19414	-7.98863	-9.79688	-6.99211	-2.42818	0.811875	-0.879254	-5.98452	-1.41524	3.66457	0.589221	-7.45857	-3.65856	-4.94707	9.91986	-2.74352	-1.09989	-9.41012	4.33568	-3.1577	-7.5756	-3.13586	-4.25268	9.07766	-7.74695	5.58446	-6.77245	-3.72392	1.25701	-2.07922	-0.0224031	-4.37979	4.98392	-4.39676	4.9743	-7.47445	6.79191	7.13656	-2.75975	4.3649	0.30477
278	-7.04814	-2.20355	-10.2397	-2.35577	6.28924	-10.4643	-9.16978	0.868622	-9.06914	-9.24592	-10.2036	-6.62444	-2.43189	-2.97251	-0.804541	-5.95364	-1.80661	4.62771	0.589951	-7.35209	-3.65293	2.26514	9.67329	-0.621928	1.27722	-7.79169	-4.34316	-3.23068	-7.68616	-3.03113	-4.2403	9.03956	-7.75626	5.30684	-6.57741	-3.35446	1.02949	-4.28469	0.0233255	7.99131	4.95096	-4.41672	5.34514	-7.24112	6.37027	7.17974	-3.35796	7.66979	-3.5934
279	-7.99955	-5.67493	-8.93037	-2.62597	6.21484	-10.4953	-8.76432	0.709599	-6.96916	-3.75335	-9.1337	-7.208	-1.01057	-1.77377	-0.8326	-6.23664	-1.42976	3.99084	0.551841	-8.29054	-3.71385	2.61168	1.56617	-3.89939	1.78312	-9.42073	-4.3356	-3.20342	-3.96842	-1.16429	-3.53329	2.27159	-5.76462	-3.00982	-7.67421	-3.98995	1.23518	-4.34992	0.194528	7.60003	5.57724	-4.42964	6.21676	-7.32671	1.50183	9.10714	-4.23067	2.68205	-3.74323
280	-7.81076	-5.52982	-10.1671	-2.16329	6.29032	-10.4815	-9.24126	1.44892	-8.41294	-3.87953	-10.1225	-4.9667	-2.69591	0.32822	-0.792642	-6.41547	-1.45034	4.6154	0.560453	-7.30727	-3.73631	2.22523	1.87681	-3.91207	-1.53066	-7.93995	-4.52786	-2.98122	-3.74528	-4.24339	-3.65528	2.1086	-5.698	-3.09206	-7.46752	-3.18745	1.00803	-3.55708	0.159369	7.47506	4.75693	-4.50978	5.235	-7.33164	1.44597	9.07862	-2.25445	2.98146	-3.59057
281	-5.50582	-7.04102	-9.09234	-2.41841	6.29947	-10.4641	-9.70513	0.618538	-9.12567	-4.01604	-9.69571	-6.70702	-2.73827	-2.58716	-0.814446	-5.95642	-1.9302	3.90133	0.58513	-8.43053	-2.44024	2.56049	1.87376	-2.00609	1.22383	-9.42933	-4.4406	-3.02779	-4.32036	-4.2793	-4.45759	2.03449	-5.86816	-3.0408	-0.466517	-3.60674	1.22968	-3.29699	-0.106544	8.00325	5.62536	-3.49932	6.29826	-6.87036	1.38125	9.06409	-2.53202	2.82109	-3.7494
282	-6.90915	-7.19385	-8.37257	-2.51719	6.25792	-10.4925	-9.77596	0.730326	-7.57684	-5.01075	-9.10537	-7.13418	-2.64886	-2.88714	-0.776475	-6.19568	-2.04426	3.89959	0.569357	-7.4097	-3.46713	2.32297	1.54831	-3.97064	1.04852	-9.43316	-4.39658	-3.01674	-4.17034	-4.18827	-4.3398	2.22765	-5.82415	-2.9379	-0.635236	-3.02717	1.2254	-1.79275	0.10841	7.81049	5.64962	-4.4035	-5.77981	-7.32052	1.32083	9.04603	-2.62424	2.76763	-3.76425
283	-5.69073	-7.26858	-8.51788	-2.12145	6.33342	-10.4618	-8.80508	0.880456	-8.5856	-4.83472	-9.64026	-7.10876	-1.12282	-1.24376	-0.783108	-6.37091	-2.13173	4.68184	0.576928	-7.61957	-3.3841	2.58481	1.87089	-3.01407	0.926898	-9.41092	-4.46552	-3.03799	-4.94702	-4.05507	-3.53249	2.28142	-5.91236	-3.06815	-0.547639	-3.92849	0.942405	-4.28821	-0.0604923	7.75743	4.85741	-4.6592	-6.71329	-7.23443	1.26196	9.04098	-2.22321	3.12255	-3.5852
284	-8.57862	-5.89233	-9.83624	-2.56545	6.2694	-10.4819	-9.38686	0.75343	-9.08635	-5.30241	-9.07951	-5.47705	-1.25688	-2.79184	-0.409123	-6.1616	-1.35628	4.54068	0.581647	-7.64242	-1.71033	2.19814	1.87116	-3.87426	0.521509	-8.10473	-4.44884	-3.02564	-4.61963	-4.20812	-3.72532	2.29266	-5.89983	-3.09313	-0.411866	-3.64818	0.916756	-3.42159	0.0933205	7.52951	5.48744	-3.3845	-6.34085	-7.09373	1.87428	9.03321	-2.80459	3.27773	-3.77409
285	-7.17334	-6.5797	-9.98214	-2.37776	6.37666	-10.4887	-8.8302	0.6828	-6.06254	-5.16829	-10.0453	-6.88705	-2.93213	0.0972624	-0.946453	-6.37972	-2.19136	3.83765	0.581135	-7.50755	-3.75904	2.54541	1.60741	4.98845	0.424605	-9.41467	-4.31408	-3.08848	-4.46935	-2.72002	-4.52602	2.20821	-5.89737	-2.80809	-0.432515	-3.9614	6.8721	-9.57288	0.118077	7.92894	4.9682	-3.40876	-6.8136	2.06136	0.726418	9.04029	-2.99398	3.2792	-3.5789
286	-8.46378	-6.11747	-8.6304	-2.54045	6.26747	-10.4811	-9.6281	0.750804	-6.66442	-4.14008	-9.95634	-5.09463	-1.36707	-1.50412	-0.924969	-6.10561	-1.33757	4.45532	0.582969	-7.52559	-3.47618	2.29923	1.61274	4.96863	0.792174	-9.42873	-4.17852	-3.0609	-4.90086	-4.05115	-3.46426	1.59559	-5.90893	-3.43515	-0.419081	-2.99144	6.84551	-8.93549	0.156154	7.65815	5.71159	-4.98004	-6.40181	1.99062	0.65798	9.04833	-2.12534	3.22479	-3.56944
287	-7.2596	-7.44452	-9.90401	-2.06161	6.24026	-10.4674	-9.58813	0.839241	-7.72775	-4.28896	-9.59863	-7.23369	-1.48761	-2.74372	-0.936066	-6.40756	-6.79785	3.95085	0.585455	-7.80407	-3.48734	2.53394	1.59601	4.93611	1.72645	-9.42324	-4.33836	-3.34837	-4.75574	-1.60693	-3.53305	1.48148	-5.58508	-2.91585	-0.537254	-2.95957	6.82565	-7.67226	-0.0280947	7.71125	5.49542	-3.37601	-5.93921	1.93235	0.811932	9.06595	2.05754	3.21968	-3.79541
288	-8.33284	-7.5554	-9.75647	-2.58777	6.40737	-10.4569	-9.00964	0.893653	-8.69905	-4.65126	-9.55354	-8.88519	-2.82443	0.570026	-0.897443	-6.10403	-6.66532	4.68134	0.578323	-7.58112	-3.49597	2.1476	1.58401	4.95394	0.644906	-9.41138	-4.30251	-3.37109	-8.30342	-4.28579	-4.60323	1.35725	-5.8514	-3.41028	-0.622439	-3.09888	6.80345	-8.5235	-0.0406031	7.49627	5.07695	-3.39459	-5.82258	1.88789	1.80888	8.48445	1.94535	3.10077	-3.80076
289	-5.74453	-7.68059	-8.42954	-2.39294	6.23085	-10.4844	-8.86596	0.903914	-9.03126	-4.46209	-9.06127	-10.2709	-2.42501	-2.05045	-0.914585	-6.45556	-6.60012	4.46988	0.579654	-10.0574	-1.91487	2.52898	1.82321	4.91956	1.9331	-8.27324	-4.41279	-2.92696	-7.95793	-1.39869	-3.8084	1.24234	-5.52282	-2.94665	-0.472307	-3.47936	6.78448	-8.3765	-0.0317094	7.77861	5.66754	-4.81634	-6.33651	2.39382	1.7435	9.1974	2.34284	2.81706	-3.81376
290	5.16145	-6.35172	-9.62073	-2.01055	6.46481	-10.4589	-8.97278	0.833595	-8.70546	-1.15041	-9.44128	-10.2663	-0.444465	-1.64739	-6.57155	-6.08308	-7.17279	3.99825	0.588315	-9.40758	-3.7343	2.17743	1.80262	5.04139	0.0890869	-9.3139	-4.5079	-2.94893	-8.29523	-2.54576	-3.53559	1.98348	-5.88032	-2.97945	-0.875051	-3.86417	6.76627	-9.35787	0.0483005	7.96052	4.34261	-5.3801	-6.61853	2.14898	1.56603	9.16854	2.24597	2.96218	-3.86024
291	5.63802	-6.80111	-9.91127	-2.4301	6.43649	-10.4778	-8.03495	0.770262	-7.81338	-1.07266	-9.48995	-8.81397	-0.517368	-1.98158	-6.57143	-6.45757	-6.76367	4.35882	0.589041	-9.94877	-3.5105	2.51448	1.85122	4.71445	1.50314	-9.44767	-4.20408	-3.39596	-8.12436	-4.29704	-3.3947	1.88235	-5.44086	-3.25866	-0.730163	-3.066	6.75406	-9.57083	0.065041	7.56432	5.74678	-4.30424	-5.77809	2.23315	1.65349	9.12887	2.15502	2.56872	-3.83589
292	5.62156	-5.51156	-9.69742	-1.99256	6.48412	-10.4338	-8.48041	0.93192	-8.0167	-1.18776	-3.18034	-10.1283	-2.39715	-1.7827	-6.528	-6.31163	-7.42964	4.55957	0.500245	-9.54864	-2.97234	2.49156	1.83861	5.10704	0.264502	-9.38374	-4.20801	-2.88217	-8.32939	-1.25554	-4.57639	1.79131	-5.80522	-3.38534	-1.28135	-3.56213	6.74722	-9.55297	0.118085	7.75863	5.293	-5.14331	-6.79279	2.82007	1.91709	8.86149	3.09109	2.69172	-3.87461
293	5.60097	-7.81051	-8.33996	-2.44476	6.49786	-10.4785	-8.24136	0.728546	-7.21088	-1.18947	-3.50383	-10.3285	-0.612538	-1.85272	-3.40078	-6.43583	-7.92209	4.69014	0.577934	-9.98304	-3.10823	2.05212	1.87427	5.05592	-0.308994	-9.51748	-4.17347	-3.41626	-7.61799	-2.62916	-3.90855	1.69774	-5.34571	-2.84113	-1.16762	-3.896	6.73503	-9.57112	0.161691	7.87465	4.77331	-5.27861	-6.6966	3.27169	1.10371	8.92983	1.12498	2.65342	-3.89449
294	5.18916	-5.6809	-8.31568	-2.59451	6.22336	-10.4879	-8.9922	0.794893	-7.48244	-0.835405	-3.34581	-10.2428	-2.55828	-2.13141	-1.41172	-6.25185	-6.90266	3.80763	0.572567	-9.89521	-1.50972	2.11035	1.86533	4.6245	2.30339	-9.45672	-4.21788	-2.91232	-8.31657	-1.69593	-3.54386	0.282965	-5.82636	-3.16971	-1.67964	-3.52286	6.71572	-7.48927	0.210465	7.46399	5.18427	-4.15172	-6.1292	2.56909	1.98976	9.06698	1.39004	2.45402	-3.91241
295	5.53582	-6.99045	-9.61742	6.26101	6.50556	-10.4599	-8.70335	0.840404	-7.95701	-0.511104	-4.00022	-8.75611	-0.745797	-2.13767	-1.95784	-6.37378	-7.69103	4.23883	0.589575	-9.36735	-3.74929	2.47545	1.87244	5.11287	-0.0914048	-9.45279	-4.27236	-3.43853	-7.76463	-1.84843	-4.57759	0.373908	-5.26552	-3.12406	-1.0276	-7.26682	6.69611	-7.32975	0.201061	7.82955	4.44159	-3.9657	-5.91507	3.36319	1.03182	9.01504	2.97429	2.96472	-3.59991
296	5.44137	-7.12852	-9.7698	5.23993	6.17355	-10.4865	-5.18168	0.943386	-8.83846	-0.683811	-3.74665	-9.88241	-2.4729	-2.1232	-1.45966	-6.22283	-6.85422	4.26017	0.577347	-10.0137	-3.24979	2.07726	1.6838	5.02584	2.112	-9.51225	-4.34089	-3.44072	-7.60283	-3.2659	-4.02308	1.78435	-5.53999	-2.86258	-1.53947	-7.15512	6.6796	-8.56347	0.206742	7.89428	5.73731	-3.80075	-6.54092	3.3288	0.953171	8.53375	0.845547	2.36876	-3.943
297	5.34758	-7.75614	-9.47939	6.23125	6.48129	-10.4685	-5.66744	-0.507752	-7.77903	-0.966781	-4.21856	-10.3203	-0.8919	-1.96632	-3.66017	-6.31343	-8.11215	3.81152	0.506641	-10.0534	-3.54502	2.46007	1.6948	5.11982	-0.689744	-9.19762	-4.06841	-2.85729	-7.5651	-2.83255	-3.556	0.528812	-5.52774	-3.11662	-1.51664	-7.17304	6.66832	-8.75243	0.173208	7.80946	5.40667	-5.43145	-6.78325	2.69237	1.96055	8.57813	1.80516	2.4193	-3.92865
298	5.2656	-7.11362	-10.2221	6.41001	6.12882	-10.4893	-5.70494	1.92412	-7.53238	-0.0216987	-4.38461	-9.03303	-2.4396	-1.60369	-1.7581	-6.15187	-8.26703	4.65937	0.589765	-9.99821	-8.14419	2.42119	1.67358	4.45004	-0.504681	-9.46885	-4.02438	-3.24902	-7.89848	-1.75618	-4.60557	1.65735	-5.58865	-2.85955	-1.61207	-7.21141	7.36193	-9.57299	-0.145263	7.77597	4.67217	-5.43932	-6.06508	3.26715	1.01493	8.63795	3.2139	2.70729	-3.61947
299	5.09207	-5.39654	-9.24751	6.33141	6.08924	-10.0762	-5.47182	-0.788724	-7.40557	0.102817	-4.35574	-10.3641	-2.25069	-2.11694	-1.53632	-6.26403	-6.9525	4.72279	0.567062	-9.89768	-7.5122	2.43852	1.68005	5.00283	2.28311	-9.49307	-4.03359	-3.2551	-7.72352	-3.05613	-4.13678	0.663861	-5.56638	-3.31563	-1.44896	-7.20014	7.40274	-8.45024	-0.160963	7.87008	5.29096	-3.64324	-6.34379	3.18136	0.888977	8.70899	1.61665	2.82268	-3.63572
300	5.16324	-5.29801	-8.29747	6.65308	6.50494	-10.4794	-5.52775	-1.06833	-8.99755	-0.341257	-4.37604	-10.1858	-2.15381	-1.91512	-2.7077	-6.39959	-8.59667	4.15668	0.589414	-10.0234	-8.27212	2.01042	1.74939	4.53116	-6.2821	-9.41092	-4.07522	-3.25933	-8.25833	-1.60318	-8.76542	0.799746	-5.60918	-2.88462	-1.44675	-7.33759	6.65682	-9.14544	-0.145771	7.88017	4.54628	-5.4416	-6.21927	3.37514	1.96672	8.77892	3.32179	2.31811	-3.60961
301	5.07667	-6.99754	-8.26755	5.34195	6.45444	-10.3753	-5.65846	2.19838	-8.25598	-0.175112	-4.28248	-10.3191	-2.08225	-1.86875	-2.08024	-6.06943	-6.94568	4.71975	0.515599	-10.0236	-8.11706	2.39533	1.78038	4.89209	-6.31295	-9.46441	-4.12469	-3.31007	-8.47193	-3.85893	-8.74433	0.947839	-5.61538	-3.11188	-1.36808	-7.1812	7.32746	-8.57262	-0.114882	7.85719	5.06678	-2.50293	-5.98922	3.32108	1.61166	9.17768	0.0142209	2.53333	-3.65468
302	5.08609	-5.29066	-9.39871	6.51751	6.05524	-10.4926	-5.68681	2.44636	-7.81498	0.24742	-4.41905	-8.95941	-2.40277	-2.12995	-1.5694	-6.38527	-8.42031	4.68576	0.567806	-10.051	-7.60152	2.03245	1.71997	5.06475	-6.3883	-9.4914	-3.94548	-3.27254	-8.40467	-4.00579	-8.38802	1.0969	-5.62295	-2.76051	-1.11608	-7.15875	6.64303	-8.43136	-0.0679543	7.98661	5.39487	-4.0137	-5.83772	2.951	1.89151	9.15775	0.273766	3.1219	-3.95289
303	5.42811	-7.69271	-9.52612	5.29666	6.40221	-10.2514	-5.7159	-1.31998	-7.84349	0.232191	-4.18519	-10.339	-2.40303	-2.13734	-1.62437	-6.27013	-6.87935	4.36783	0.526663	-10.0746	-8.22793	2.40759	1.63481	4.86031	-6.3479	-9.48921	-3.9153	-3.2895	-8.08176	-1.59273	-8.74509	2.01485	-5.57819	-2.76889	-1.57448	-7.22344	7.30522	-8.50353	-0.0129192	7.71718	4.96507	-3.96597	-5.77966	3.36156	1.18239	9.12211	3.27475	2.66972	-3.68576
304	5.3046	-6.93945	-8.21067	6.97891	6.32228	-10.4415	-5.28167	-1.54045	-7.2752	0.193924	-3.25726	-10.1963	-2.3667	-2.13268	-3.15517	-6.00568	-9.01988	3.84453	-9.76024	-9.94569	-8.04427	2.38367	1.63848	5.0825	-6.32754	-9.46319	-4.27411	-3.32945	-8.45967	-3.47444	-8.76234	1.93557	-5.63043	-3.12216	-1.34863	-7.1747	7.31264	-9.568	0.01622	7.45818	5.70509	-4.00229	-5.70992	3.07541	1.15597	9.09232	0.550867	3.25924	-3.67334
305	5.13166	-7.76686	-10.0732	5.27636	6.31188	-10.4872	-5.60303	2.71604	-7.44473	0.258273	-4.06267	-9.12	-1.78519	-1.81508	-4.78328	-3.04683	-6.5258	4.73688	-9.76806	-9.78926	-8.11563	2.38944	1.63146	4.82485	-6.1903	-9.50007	-4.36543	-7.3005	-8.37814	-1.61177	-8.75111	2.16165	-5.53272	-3.00369	-1.23841	-7.28002	7.27382	-8.3646	-4.17991	7.92105	4.65431	-3.88039	-5.69892	2.29668	1.75002	9.12938	3.16717	3.37796	-3.70266
306	5.22095	-5.42198	3.31447	6.81751	6.34826	-6.45473	-5.13997	-1.74468	-8.39603	0.0744886	-3.90782	-10.316	-1.70802	-2.0043	-2.04884	-4.92849	-8.80158	4.05487	-9.75215	-10.0029	-8.29284	2.38618	1.65509	5.09506	-6.1656	-9.4211	-4.34473	-7.65268	-8.4075	-1.63757	-8.51304	2.07968	-5.49905	-2.79649	-1.5551	-7.35889	7.44943	-9.5714	-4.41878	7.82989	5.17783	-3.92066	-6.37773	2.29188	1.2236	9.18863	3.40421	2.75769	-3.71449
307	5.51942	-7.34297	-0.444251	7.09385	6.3198	-5.92794	-5.42383	2.98227	-7.83941	0.0932125	-3.10296	-10.2878	-1.6141	-1.71413	-1.43596	-3.05044	-6.60695	3.92358	-9.78595	-9.97055	-7.4849	2.34309	1.66252	4.79521	-6.33912	-9.49499	-4.16528	-7.15506	-8.4421	-3.67393	-8.73864	1.91444	-5.50551	-3.1246	-0.84776	-7.18471	7.29473	-8.5739	-5.81457	7.61639	5.73902	-3.9235	-6.26176	2.34726	1.45897	9.15622	-0.23173	2.80335	-3.73174
308	5.54802	-5.92623	0.574189	5.25244	-3.16481	-6.13808	-5.72514	-1.97272	-7.32893	0.00518408	-3.00896	-10.3094	-2.00023	-1.87579	-2.5	-5.17969	-6.67353	4.10842	-9.78742	-10.0577	-8.14058	2.3715	1.64312	5.06772	-6.4119	-9.22406	-4.04043	-7.47991	-8.33647	-2.39804	-8.74031	1.87439	-5.52541	-2.82213	-1.61378	-7.29405	7.43163	-8.39488	-4.66232	7.5089	4.87196	-3.84761	-6.45483	2.97848	1.14782	9.19367	3.38239	3.46945	-3.72609
309	5.58168	-0.60641	3.05513	7.20601	-3.0391	-6.50042	-5.1588	3.25545	-7.347	0.175407	-3.74367	-9.25207	-1.88618	-1.94244	-1.72376	-8.64738	-9.2739	-5.50481	-9.78505	-10.0632	-7.45563	-12.5033	1.64395	4.9023	-6.22966	-9.49828	-10.1679	-7.093	-8.42372	-1.75401	-8.60025	1.97794	-5.50997	-2.78877	-0.982805	-7.1678	7.24543	-8.07618	-4.8946	-7.94163	5.57881	-3.98621	-5.94726	2.71057	1.12095	9.18953	3.36383	2.81569	-9.98271
310	5.60944	-0.562414	0.78966	5.23924	-0.777946	-5.8957	-5.10161	3.52626	-8.12901	0.106814	-2.91005	-10.3314	-4.08403	-2.13476	-1.36161	-3.02258	-6.75456	-6.934	-9.76835	-10.0048	-8.3115	-11.7962	-2.14066	5.06442	-6.4237	-9.44252	-10.144	-7.07657	-8.43491	-1.84948	-8.73525	-10.3741	1.15012	-0.63028	-0.735098	-7.16051	7.15288	-9.56883	-5.78107	-8.76313	7.20197	-3.95869	-6.25837	2.84835	-0.229714	-2.6562	-0.455213	3.5656	-6.20648
311	5.33849	-0.929021	-0.404298	7.34077	-2.04295	-6.17349	-5.55407	-2.1995	-7.72036	0.0116314	-3.56121	-10.3322	-3.48744	-1.75331	-4.39238	-5.42243	-9.48358	-6.28066	-9.74494	-9.49746	-8.25848	-12.5318	-2.68373	4.88336	-6.33269	-9.42939	-10.2069	-7.7753	-8.18006	-1.69124	-8.76212	-9.75824	1.92635	-1.04384	-1.60538	-7.17124	7.20695	-8.39812	-3.82639	-8.39016	7.37706	-4.00933	-6.12635	2.37789	-0.728615	-1.14691	-0.741611	3.5274	-8.94069
312	5.59829	-0.725367	3.59909	7.37571	-0.803629	-5.86464	-5.35605	3.79263	-7.39317	0.0849782	-2.77197	-9.64489	-4.62933	-2.132	-2.92477	-8.46161	-9.65201	-6.71511	-9.75482	-10.0499	-7.42981	-12.3822	-3.48289	5.05445	-6.18834	-9.33264	-10.2279	-7.80016	-8.35095	-1.6342	-8.74389	-10.0309	1.08135	-0.709403	-9.33537	-7.16031	7.09404	-8.24841	-5.68897	-8.19776	7.03391	-3.71002	-6.08319	2.46153	-0.729966	-2.66704	2.57828	3.82265	-9.99178
313	5.26069	-0.552376	0.98938	5.43584	-3.30483	-6.22017	-5.74033	-2.45734	-7.22093	-0.254028	-3.30941	-10.2994	-3.50416	-1.68191	-1.84092	-3.89256	-9.79623	-7.05673	-9.7802	-9.44673	-7.83041	-12.4897	-2.57957	4.88322	-6.31429	-9.49712	-10.1792	-7.96289	-8.22887	-4.20917	-8.62038	-10.1764	1.65773	-1.11005	-8.91369	-7.1826	7.03282	-7.87368	-3.97931	-8.04921	7.16427	-3.68877	-4.96829	2.32151	-0.761925	-1.06361	2.44852	3.31337	-9.9968
314	5.45036	-0.920368	2.56228	5.58448	-2.92906	-5.56909	-5.61921	-2.69397	-7.44897	-0.0988167	-2.94946	-10.3385	-4.55795	-2.13182	-1.34752	-7.98866	-6.38093	-6.9009	-9.75692	-10.0429	-7.70607	-12.084	-3.40725	4.8837	-6.23263	-9.50396	-10.1281	-7.89852	-8.34068	-2.38302	-8.76227	-10.3763	2.41517	-1.00685	-9.42729	-7.30902	6.91588	-9.56829	-5.74721	-8.20992	7.35124	-3.74647	-3.53912	3.19674	-0.72824	-2.5315	-0.604962	3.29993	-9.93275
315	5.24851	-0.740254	-0.17255	7.29258	-1.89263	-6.51195	-5.53193	4.04474	-7.59568	-0.600446	-3.02187	-10.3149	-3.5822	-2.05022	-4.60608	-4.15674	-9.87903	-6.15613	-9.7792	-9.67684	-7.9218	-12.5952	-2.16563	5.05717	-6.30334	-9.45892	-10.3951	-7.98223	-8.20905	-1.95737	-8.73684	-10.261	1.26852	-1.11815	-9.53887	-7.23827	6.97774	-8.36025	-5.35783	-8.72406	7.05963	-3.54435	-6.17194	3.09769	-0.43133	-0.861906	2.71641	4.27453	-8.75493
316	5.3463	-0.870821	2.29179	7.31715	-2.69601	-5.85403	-5.10772	0.0742423	-7.93359	-0.42391	-3.09993	-9.43816	-4.08014	-1.89009	-2.13306	-8.23665	-6.29952	-5.88119	-9.51686	-10.0189	-8.08106	-12.6706	-3.54955	0.582877	-6.35509	-9.51692	-10.374	-7.80976	-8.36644	-4.11543	-8.26177	-10.0324	2.18387	-0.856164	-9.34702	-7.18698	-8.05466	-1.29832	-5.28428	-8.33036	7.43054	-3.69961	-3.55346	8.71016	-0.732361	-2.61224	3.03616	3.035	-9.99572
317	5.44379	-0.589855	0.0945669	5.91675	-1.9674	-6.1972	-5.10162	-2.55123	-8.55885	-0.916731	-2.7493	-10.3318	-4.48375	-1.83844	-2.06821	-4.41394	-6.44421	-7.03983	-9.72501	-9.57474	-7.95661	-12.7376	-2.49952	0.443997	-6.26034	-9.49345	-10.3462	-7.92369	-8.20204	-2.60859	-8.75601	-10.3679	1.21037	-0.591532	-9.53378	-7.17074	-8.04726	-1.16586	-5.17083	-8.65992	7.23766	-3.66163	-6.09554	10.4861	-0.713217	-0.965312	2.88034	4.0561	-6.44165
318	5.6148	-0.519273	2.82129	5.74714	-3.45377	-6.41907	-5.58137	-0.21032	-7.94615	-0.765228	-3.22602	-6.34041	-3.64057	-2.13678	-3.92218	-7.71272	-9.69861	-6.093	-9.70555	-10.0493	-7.72767	-12.4801	-2.1246	0.371234	-6.32039	-9.46542	-10.4356	-7.57947	-8.35789	-2.08235	-8.63039	-10.3794	1.34251	-0.894951	-9.24188	-7.1766	-8.03334	-1.21048	-5.09882	-8.72422	7.08946	-3.29782	-4.8685	7.78572	-0.569884	-2.38896	8.33924	1.03377	-8.5527
319	5.52272	-0.665308	0.374831	6.08436	-0.835337	-5.62021	-5.56634	-2.75496	-7.25365	-1.13721	-3.28712	-2.31848	-4.39236	-2.09879	-1.35792	-4.67585	-10.2827	-5.69023	-9.59916	-10.0129	-7.58573	-12.7012	-3.11247	0.36258	-6.39843	-9.10869	-10.4145	-8.14332	1.23993	-4.29154	-8.73745	-10.3825	2.73215	-0.627553	-9.25118	-7.38587	-8.00644	-0.79557	-5.24805	-8.57673	7.22148	-3.64054	-3.57398	7.68228	-0.815285	-2.41928	5.55048	3.09415	-9.98564
320	5.5478	-0.828371	1.59247	7.37426	-3.60445	-6.48116	-5.64652	-2.37765	-7.66062	-1.04358	-2.52268	-7.71959	-4.73389	-10.5413	-2.30955	-7.44306	-10.2722	-6.93961	-9.47364	-10.0255	-8.03114	-12.7625	-3.02301	0.432098	-6.37731	-9.49801	-10.2734	-7.38377	1.47717	-2.16991	-8.70412	-10.3776	2.60839	-0.644519	-9.54032	-7.15655	-7.98318	-1.3093	-5.33691	-7.96206	7.40634	-3.58443	-4.84357	8.60096	-0.65752	-0.7665	6.59179	4.45346	-8.35819
321	1.22671	-0.756277	-0.328628	6.2746	-2.82469	-5.87503	-5.73585	0.342225	-7.08099	-8.22412	-2.31527	-4.50166	-3.49865	-9.63534	-1.97068	-2.95533	-10.2995	-7.14256	-9.72234	-9.97798	-8.21074	-12.7266	-2.9703	0.622047	-6.25235	-9.50582	-10.2533	-7.97963	1.24947	-2.20014	-8.11132	-10.3829	1.30928	-0.763991	-9.35906	-7.18718	-7.95895	-1.40634	-5.37152	-8.24462	7.11761	-3.42036	-5.29171	7.95702	-0.699654	-2.48001	6.75783	3.17708	-10.0087
322	1.11742	-0.646793	-0.294397	6.20056	-1.71918	-5.70671	-5.1904	0.707123	-7.54884	-8.82934	-2.10221	-2.09628	-4.06989	-9.07698	-4.1704	-3.16894	-10.2916	-6.09227	-9.71515	-10.0296	-7.97874	-12.6828	-3.10644	0.424026	-6.25701	-9.47037	-10.3243	-7.20425	1.22948	-4.26967	-8.75863	-10.369	1.32172	-0.751357	-9.54043	-7.32256	-7.95074	-0.996233	-4.46179	-8.54965	6.94135	-3.85184	-5.81906	10.6588	-0.655345	-0.7161	5.48914	2.22248	-9.96545
323	1.30755	-0.607153	1.8517	6.26347	-2.56053	-5.87825	-5.22737	0.555099	-7.10408	-8.70945	-5.16654	-6.55808	-4.05215	-10.0282	-1.37506	-7.15307	-10.2793	-6.07896	-9.55695	-10.0745	-8.10791	-12.7205	-3.31434	0.361869	-6.24834	-9.4597	-10.2917	-8.45962	1.45741	-1.98065	-8.62989	-10.3817	2.7877	-0.913546	-8.88472	-7.16634	-7.94204	-1.15413	-4.45251	-8.56189	7.45045	-3.15357	-5.96774	10.8056	-1.09236	-2.54273	8.10887	3.11669	-9.84797
324	1.13219	-0.490994	4.37701	6.28673	-0.810903	-6.31768	-5.73049	1.18948	-7.53023	-9.98053	-5.53494	-7.86367	-4.28129	-8.86222	-10.5516	-3.38285	-10.2855	-5.02521	-9.70557	-10.0321	-7.91517	-12.6498	-2.81369	0.648869	-6.31168	-9.50098	-10.5234	-7.10332	1.22864	-2.30828	-8.74713	-10.3578	1.3462	-0.684883	-9.42606	-7.18929	-7.92381	-1.18029	-4.49477	-8.41256	7.52756	-3.84002	-3.90863	7.87346	-0.535754	-0.711523	5.67221	2.76666	-5.97486
325	2.32324	-0.496839	2.06355	6.26328	-1.4842	-5.93803	-5.55016	0.941841	-7.56783	-9.09417	-5.79142	-4.22303	-4.77321	-10.1249	-10.2622	-6.87358	-10.245	-7.18479	-9.42616	-10.0424	-7.80753	-12.7238	-3.21282	0.673145	-6.42993	-9.50452	-10.5325	-8.30898	1.46742	-8.03682	-8.75471	-10.3731	2.77218	-0.917693	-9.07719	-7.25162	-7.87035	-1.01622	-4.72156	-8.20029	7.13412	-2.98444	-5.48557	8.82545	-0.621948	-2.61328	6.92632	4.59818	-8.15239
326	2.03946	-0.528066	4.47812	-4.55774	-2.40935	-6.02374	-5.12008	1.41737	-6.97227	-8.08338	-5.13122	-1.88535	-3.90413	-10.4769	-10.0321	-3.62569	-9.68104	-6.50858	-9.71626	-9.90547	-8.1494	-12.7201	-3.47005	0.410284	-6.26329	-9.46764	-10.5352	-7.10003	1.24352	11.4533	-8.75126	-10.2939	1.13606	-1.10228	-9.31845	-2.5915	-7.78455	-1.32584	-4.58953	-8.17111	7.27778	-2.83846	-3.71717	8.04018	-0.209842	-0.734151	7.89014	3.0973	-9.9001
327	1.12473	-0.648689	4.56586	-4.46802	-0.945923	-5.8043	-9.24739	1.66671	-7.6173	-9.85318	-5.6658	-5.84152	-4.03231	-10.8507	-10.6764	-6.59448	-10.3001	-4.87627	-9.71357	-10.0369	-7.81818	-12.7414	-2.79264	0.353415	-6.32515	-9.50739	-10.5677	-7.19984	1.24035	11.2947	-8.74716	-10.3806	0.981483	-0.779806	-9.25993	-2.66642	-7.72473	-0.852518	-4.8752	-8.38358	6.96713	-3.82271	-4.87983	8.20419	-0.929086	-2.28169	6.32313	4.54523	-7.93767
328	2.20735	-0.809242	-0.380561	-4.80052	-0.844432	-5.92568	-8.90498	2.42312	-7.46928	-8.95134	-5.94475	-7.45071	-3.56095	-9.04149	-10.3569	-2.98074	-10.2675	-6.15919	-9.72615	-10.0223	-8.20451	-12.7385	-3.55237	0.46227	-6.3425	-9.50657	-10.4591	-8.57706	1.22893	-8.37932	-8.75368	-10.3052	2.67924	-0.571905	-9.38779	-2.68741	-7.6779	-0.870856	-5.03007	-8.76275	7.44515	-2.72843	-3.56035	9.90788	-0.744813	-1.47595	5.73014	1.94889	-9.7805
329	1.32911	-0.82803	-0.421077	-4.6762	-1.07146	-6.36763	-9.11906	1.11899	-7.0833	-8.08734	-5.41534	-3.93308	-4.768	-10.0778	-9.99817	-6.10754	-10.2957	-6.6286	-9.62232	-9.95232	1.60357	-12.7546	-2.93626	0.486156	-6.21925	-9.50379	-10.4758	-7.20194	1.2657	-8.37051	-8.7532	-10.38	1.02368	-0.81991	-9.37263	-2.58335	-7.6361	-0.768003	-5.61898	-8.21554	7.25994	-3.76193	-5.66253	8.12543	-1.0091	-1.06892	8.5757	4.56312	-7.71971
330	1.32605	-0.895987	4.07944	-4.77207	-0.893165	-6.20832	-9.31354	2.16319	-7.61982	-10.0689	-5.89344	-1.68948	-3.7309	-8.92888	-10.7567	-6.34937	-10.301	-7.18558	-9.464	-10.0352	0.966834	-12.7022	-3.2471	0.388928	-6.30798	-9.50102	-10.4968	-7.57955	1.25257	-8.36651	-8.75732	-10.3824	1.24977	-1.04106	-9.32416	-2.69684	-7.7126	-1.55384	-5.47135	-8.55607	7.54348	-3.72255	-5.11025	8.48829	-0.767986	-1.26033	6.44404	1.69239	-9.5575
331	1.07236	-0.514697	1.17988	-4.80029	-0.950641	-6.24471	-8.9179	2.26826	-7.0471	-8.4772	-5.19365	-6.09493	-4.16007	-9.74524	-10.4134	-2.94752	-9.71996	-6.28469	-9.42726	-9.86828	1.57246	-12.7235	-3.36825	0.694721	0.338727	-9.50415	-10.5024	-7.38122	1.33979	-8.38575	-1.29951	-10.3751	2.52504	-1.11527	-9.53341	-2.57782	-7.58262	-1.6662	-5.26834	-8.78819	7.15075	-2.61904	-4.69565	10.2851	-0.388067	-2.34623	5.60848	3.09715	-7.29386
332	1.31097	-0.777223	3.8443	-5.07912	-2.27338	-6.13673	-9.46113	2.23462	-7.50146	-8.21365	-5.32388	-7.58406	-4.73383	-9.22408	-10.9028	-2.93565	-10.2966	-6.80365	-9.69903	-9.81581	1.56548	-12.733	-2.65048	0.349938	-0.633269	-9.50766	-10.5204	-7.86235	1.38989	3.74591	-1.15803	-10.3755	0.987088	-0.653093	-9.53691	-2.62897	-7.84663	-0.707565	-5.03512	-8.36589	6.99167	-0.0358049	-3.80183	10.0911	-0.681437	-0.895318	8.81852	4.41706	-7.50357
333	1.06976	-0.502103	4.2699	-4.53494	-2.10078	-5.94413	-9.05346	2.35919	-7.09598	-10.0612	-5.30907	-3.65261	-3.67722	-10.1525	-10.0179	-5.88203	-9.78633	-5.32748	-9.71938	-10.0435	0.902061	-12.7251	-2.37906	0.506319	-1.49992	-9.50614	-10.505	-7.75579	1.307	5.02765	-1.15225	-10.3519	2.32316	-1.06747	-9.31132	-2.7484	-7.79471	-1.45693	-4.82927	-8.71942	7.3242	-0.282474	-4.78679	8.29982	-1.24286	-0.774278	6.12043	3.11569	-9.68185
334	1.07589	-0.389535	1.36005	-0.180533	-2.13864	-6.40623	-9.39044	2.11559	-7.61433	-8.36717	-5.22583	-5.05795	-4.02776	-10.3641	-10.8089	-3.03076	-10.293	-7.13779	-9.41666	-9.98942	1.39796	-12.6673	-3.62937	0.455459	0.590656	-9.46134	-10.492	-7.86612	1.35642	4.99209	-1.16982	-10.3868	0.971759	-0.960204	-9.40567	-2.6497	-7.53363	-0.736209	-4.65359	-8.65536	7.16189	-0.128492	-4.16654	8.39257	-0.776131	-2.03905	6.02383	1.45452	-9.43039
335	1.27799	-0.752875	-0.45473	1.39369	-1.26566	-6.11845	-9.3715	1.15858	-7.49974	-10.0967	-5.95992	-1.48664	-4.70439	-10.6409	-9.92833	-5.65683	-10.2942	-6.28983	-9.69693	-10.0163	1.49502	-12.6276	-2.5063	0.342181	-1.48524	-9.49851	-10.5272	-7.76293	1.40066	3.71472	-1.28306	-10.3884	0.960606	-1.11575	-8.90989	-2.66457	-7.9502	-1.62957	-4.52694	-8.12003	7.46346	-0.023804	-3.79301	9.4992	-0.763616	-2.22089	5.86992	4.23156	-7.08679
336	1.22443	-1.48253	-0.465016	1.41374	-2.07784	-6.11404	-8.86909	2.04558	-7.06191	-8.59158	-5.47806	-6.96493	-3.8297	-8.87514	-10.4247	4.14742	-10.2965	-6.4574	-9.70253	-10.0309	1.68542	-12.7316	-3.60096	0.374691	-1.01812	-9.50742	-10.5355	4.75028	1.28732	3.71934	-1.33254	-10.2978	2.11441	-1.12997	-9.33218	-2.59807	-7.90957	-1.63046	0.149348	-8.05049	7.48924	-0.321924	-4.44736	9.35931	-0.0540413	-1.43599	9.35251	1.25592	-9.11855
337	1.24238	-0.200892	-1.20424	-2.10165	-0.96076	-0.049236	-9.24871	2.474	-7.41452	-8.09558	-5.92286	-3.36911	-3.78638	-9.45601	-10.8767	4.13629	-9.82386	-5.17182	-9.72151	-10.0687	1.88345	-12.536	-2.18984	0.718558	0.666938	-9.50153	-10.5384	4.78623	1.36834	4.99428	-1.19587	-10.2392	1.06366	-0.981464	-9.01022	-2.65495	-7.58877	-1.3717	0.144703	-8.11105	7.01711	-0.302004	-4.82434	9.80475	-0.00114075	-1.86793	7.68405	3.12967	-6.89186
338	1.10534	-1.8115	-0.607218	1.36531	-0.876814	-1.55717	-9.1278	1.11099	-7.62295	-9.85851	-5.12939	-5.58793	-3.90037	-10.2525	-10.0029	4.151	-10.2946	-6.44783	-9.73322	-10.0113	1.17163	-12.5718	-3.60501	0.454651	0.588608	-9.48672	-10.5245	4.76686	1.30318	3.73252	-1.23204	-10.3846	0.780493	-0.816095	-9.28159	-2.59688	-7.98507	-1.54644	0.166162	-8.50901	7.17734	-0.144967	-3.71297	9.64816	-0.523172	-1.33096	6.2216	3.78013	-6.66712
339	1.21739	-1.25597	-1.10425	-0.401292	4.59211	-1.25814	-9.53345	1.98425	-7.12636	-8.08956	-5.96939	-1.2766	-4.66531	-10.0821	-9.9978	4.13404	-10.2963	0.164671	-9.67465	-9.99665	1.03566	-11.3689	-2.27188	0.526802	-0.825331	-9.5065	-10.5093	4.71653	1.3318	5.02546	-1.302	-10.3498	1.40597	-1.0509	-9.1446	-2.64424	-7.63607	-1.22919	-0.819016	-7.9683	7.30251	-0.336978	-4.87283	10.9053	-0.776933	-1.67319	6.59693	1.1132	-9.27717
340	1.17381	-1.75714	-0.925376	-1.91146	4.40498	-0.236931	-9.12103	1.91229	-7.43831	-9.95913	-5.6046	-2.82299	-3.97217	-8.95971	-10.8503	4.14096	-10.114	0.818636	-9.72208	-9.84803	1.62167	-10.7553	-3.63333	0.313429	0.662516	-9.50267	-5.88641	4.73388	1.38365	4.65915	-1.28567	-10.3825	1.20239	-0.651047	-8.96371	-2.67763	-8.04712	-1.40513	0.159623	7.25021	7.50704	-0.163476	-3.64302	9.0797	0.142278	-1.23133	6.41323	4.02576	-5.8903
341	1.07619	-0.229055	-0.767498	0.213846	4.51078	-1.64115	-9.41418	1.76402	-7.60941	-8.13799	-5.67174	-7.30428	-4.76574	-10.5945	-10.0602	4.14941	-9.81188	0.934537	-9.70496	-10.0021	1.7365	-11.1165	-5.5255	0.370147	-0.833749	-9.49502	-5.98939	4.92232	1.32387	4.4961	-1.2173	-10.1845	2.75864	-4.97127	-9.53145	-2.75483	-8.01947	-1.06914	-0.551249	6.15949	-3.59235	0.0122375	-3.80695	8.94305	-4.65572	0.324373	9.08236	-2.89556	-5.59731
342	1.85356	-0.502289	-0.98779	-1.55443	5.02653	-1.0824	-8.85478	1.85046	-7.16584	-9.68816	-5.07272	-1.04995	-4.60176	-9.86071	-10.4399	4.19117	-10.2289	0.791815	-9.71997	-9.93103	1.10863	-11.4598	-8.84081	0.740341	-1.23066	-9.50337	-5.76227	4.94482	1.27224	4.01493	-1.18567	-10.3855	2.35602	-4.72164	-9.18499	-2.55036	-8.07169	-1.6602	-0.674431	4.70007	-3.68734	0.021573	-4.81826	7.40003	-4.65735	0.168682	6.22365	-2.24731	-5.83361
343	1.19072	-0.817839	-1.3809	1.5401	4.31469	0.0586915	-8.72856	2.51797	-7.29172	-8.10663	-5.6611	-4.78613	-5.29153	-10.6788	-9.96999	4.14173	-10.2951	0.958113	-9.44173	-9.98474	2.02603	-11.5767	-5.26221	0.558829	0.506625	-9.4946	-5.79636	4.87	1.43336	4.916	-1.3221	-9.99476	2.71326	-5.00505	-9.52241	-2.60765	-8.06483	-0.836586	0.165334	7.94934	-3.81483	-0.171744	-3.80526	9.21864	-4.61964	-0.0247473	7.09813	-3.15619	-5.39288
344	1.16201	-0.888981	-1.34104	0.0231723	4.43796	-0.401568	-8.8317	1.71593	-7.63866	-9.76565	-5.07952	-3.0983	-4.63405	-8.89076	-10.8569	4.15181	-5.62331	0.211492	-9.69555	-10.0272	1.18388	-10.8714	-9.03748	0.449134	-1.24533	-9.50148	-6.0279	4.89136	1.44704	3.8952	-1.14514	-9.61485	2.38963	-4.69921	-9.18624	-2.73206	-8.07044	-1.65231	0.156939	7.39326	-3.63281	-0.176876	5.25286	7.55078	-4.57954	0.0550739	5.9136	-3.18507	-5.18745
345	1.62851	-1.69298	-0.318608	0.605129	4.70797	0.188346	-9.01062	1.61902	-7.38305	-8.0855	-5.84528	-6.77087	-4.89589	-9.22278	-9.96058	4.18497	-6.11317	0.647654	-9.72711	-9.97738	0.903724	-11.057	-5.00688	0.330693	0.423915	-9.50544	-5.77231	4.82853	1.28669	4.8013	-1.23952	-10.1941	2.31908	-5.02861	-9.1588	-2.56265	-8.06864	-0.926262	-0.468738	6.3464	-3.63697	-0.00163182	4.25738	1.64838	-4.56085	-0.0541411	6.0446	-3.191	-5.86008
346	1.14747	-0.443264	-0.463054	-1.73271	4.41229	-0.88938	-8.72987	2.51148	-7.61353	-9.49562	-5.76529	-5.32632	-5.19822	-9.42452	-10.5029	4.1447	-6.15563	0.965573	-9.67822	-9.91766	1.87023	-10.835	-8.57093	0.370485	0.266105	-9.46294	-5.80544	4.8465	1.41089	3.80388	-1.21314	-9.67735	2.79349	-5.06978	-9.12948	-2.73963	-8.0589	3.0325	-0.204698	7.91739	-3.64193	-0.343679	3.11515	3.04941	-3.87181	0.0386046	7.48254	-2.12063	-5.00606
347	1.41792	-1.3331	-1.26556	-1.37743	5.02939	-1.6656	-8.94039	1.49386	-7.3414	-8.08755	-5.1312	-2.56839	-4.48947	-10.4343	-10.0065	4.16354	-4.64509	0.249959	-5.63294	-9.95646	2.01292	-12.3602	-6.03295	-5.84105	-1.0345	-9.49054	-5.86856	4.80004	1.26094	4.2585	-1.26909	-10.1934	2.8712	-4.68012	-9.21287	-2.60134	5.95115	3.04917	-0.319839	5.10683	-3.70728	0.0356152	5.4469	2.86541	-6.18381	-0.0326762	7.28747	-2.96982	-5.92063
348	-7.30574	-0.210983	-0.360887	1.4699	4.82249	-0.464146	-9.41441	1.58349	-7.58632	-9.60041	-5.70151	-7.1454	-4.40283	-10.3248	-10.8893	4.14529	-6.0085	0.561676	-6.38378	-9.91344	1.1796	-11.648	-6.29021	-5.02304	0.346202	-9.5041	-5.90628	4.81038	1.42487	4.53137	-1.23212	-10.086	2.24125	-4.84901	-9.53587	-2.55523	5.97954	2.95648	-0.39228	7.67046	-3.87301	-0.0593514	3.14189	3.00589	-6.20559	0.149988	5.79697	-3.13313	-5.99159
349	-6.65951	-0.982473	-1.20776	-2.29159	5.03116	-0.718022	-9.05393	2.50078	-7.24659	-8.08824	-5.22046	-10.4199	-5.06906	-10.2708	-10.1418	4.17336	-5.9651	0.897877	-5.66599	-10.0608	0.888146	-11.6059	-5.77704	-4.0012	-0.338992	-9.49892	-5.80204	4.99571	1.26663	3.94967	-1.26654	-9.81326	2.83727	-4.80882	-9.11426	-2.74446	4.99438	2.83847	-0.414832	7.88745	-3.61442	-0.045292	3.96039	1.38684	-6.15301	0.291404	-4.69011	-3.17934	-4.89532
350	-5.58084	-0.5725	-0.482002	-0.902358	4.27336	0.291685	-9.31478	1.38375	-7.61475	-9.24309	-5.71593	-10.1494	-4.39096	-2.00716	-10.5325	4.14586	-6.12362	0.499717	-5.69538	-9.99984	1.7753	-11.3273	-7.03876	-5.88022	-0.159995	-9.08533	-6.0176	4.59461	-8.49972	4.12861	-1.28021	-10.3188	2.28079	-4.85501	-9.25188	-2.71162	2.92506	3.11709	0.116357	4.90567	-3.84022	-0.180127	6.01656	2.77387	-4.10395	2.26241	-4.61607	-2.86706	-4.93998
351	-6.81448	-1.92028	-1.20461	0.407481	4.48784	-1.65258	-9.55886	1.4684	-7.17359	-8.08755	-5.41305	-10.4389	-5.36066	-1.95056	-10.8602	4.15841	-4.65756	0.913314	-6.90615	-10.0478	2.09928	-10.866	-7.2882	-5.1924	0.0654298	-8.97841	-5.91801	4.58568	-8.02008	4.39322	-1.24536	-10.2105	2.16174	-4.88506	-9.12168	-2.62593	4.87539	2.92168	0.0372205	6.53875	-3.69701	-0.0503587	4.12304	3.40376	-4.31338	2.09322	-4.5749	-3.14485	-5.09769
352	-5.62338	-0.254705	-1.39151	-2.50098	4.97516	-0.444716	-9.2232	1.28679	2.30537	-9.37227	-5.53025	-10.0861	-4.35614	-1.60523	-10.0377	4.14771	-5.84187	0.28648	-6.48411	-9.96786	1.04381	-12.3728	-6.54369	-5.86175	-0.483049	-9.51201	-5.80206	4.96621	-8.49207	3.77347	-1.28542	-10.2499	2.94644	-4.9259	-9.38718	-2.57597	5.91885	3.16584	-0.0756673	6.90178	-3.61694	-0.190546	3.13174	1.1583	-4.60275	0.784564	-4.92691	-3.19253	-5.48013
353	-7.18798	-1.4093	-1.32076	1.0395	4.93011	-0.483907	-9.33346	2.46473	2.33703	-3.16271	-5.25826	-10.4144	-5.39179	-1.74556	-10.0614	4.14152	-6.11004	0.766635	-5.71863	-10.0796	1.42645	-11.4167	-6.79016	-3.92142	-0.65099	-8.94394	-5.97037	5.05736	-8.52819	4.77087	-1.17536	-10.0283	2.91096	-4.74693	-9.37276	-2.61769	4.75745	3.16824	-0.21019	7.6844	-4.03245	0.0273633	3.79497	0.927635	-4.48534	0.652862	-4.78775	-3.08303	-5.28175
354	-7.27518	-1.55202	-0.384395	-1.19722	4.29546	0.37037	-8.84745	2.32957	2.29855	-3.05057	-9.42896	-9.83351	-4.36163	-1.99055	-10.5139	4.15567	-4.71837	0.00245962	-6.43629	-10.0796	1.31783	-11.2001	-8.05403	-3.83909	0.176308	-9.51397	-6.03165	5.0269	-8.24345	4.32702	-1.26366	-9.97271	2.20296	-4.77665	-9.23357	-2.72299	2.74445	3.10689	-0.194147	7.90733	-3.30315	-0.208797	4.74225	2.78119	-3.64179	0.486715	-5.97318	-2.8296	-5.68042
355	-5.67855	-0.332313	-1.17424	0.810716	4.42178	-0.406817	-8.88907	1.20768	2.30999	-3.38196	-9.98858	-9.95256	-5.35313	-1.86853	-10.6777	4.14681	-6.37309	0.735086	-6.57525	-9.99619	1.99803	-10.867	-8.30536	-5.35146	0.470088	-9.09542	-5.76954	4.56556	-8.47286	4.94391	-1.28619	-10.4224	3.02064	-4.93068	-9.37052	-2.57187	5.86302	2.75874	-0.202267	6.71737	-3.74354	0.0611574	3.3497	3.2254	-5.51352	1.50667	-4.37138	-3.05432	-5.90344
356	-6.74613	-1.87389	-0.327587	-2.69285	4.89532	-1.66161	-8.85998	1.35518	2.33581	-3.27987	-8.20758	-10.4144	-4.50722	-1.51331	-10.5945	4.1464	-6.01679	0.338601	-5.74777	-10.0342	0.942365	-10.8783	-7.53481	-5.86989	-0.186903	-9.49734	-5.7696	4.54661	-8.12934	3.83693	-1.28781	-10.3079	2.64424	-4.71979	-9.13566	-2.62044	4.62733	2.72666	-0.270364	7.08236	-3.91467	0.0470204	4.87993	3.52219	-3.28447	1.29183	-6.0209	-3.15047	-6.11865
357	-6.46612	-0.193963	-1.11393	-1.04673	4.75745	-0.408848	-7.76456	1.26095	2.3028	-2.83551	-9.96877	-9.64162	-4.61182	-1.88001	-10.6228	4.15226	-6.067	0.121507	-6.52912	-9.98495	2.08671	-11.7251	-7.79136	-5.51506	0.0191809	-9.50307	-5.84055	4.52821	-8.51095	4.65494	-1.12854	-10.0927	2.13011	-5.21477	-9.43741	8.24586	4.48241	2.7386	-0.229217	5.30518	-3.62372	-0.242157	3.12174	3.3663	-5.72747	0.800754	-4.27929	-1.58857	-5.98984
358	-5.7867	-0.628908	-1.06168	1.23323	4.93581	0.390493	-6.25169	2.40801	2.33728	-2.71919	-10.6074	-10.4194	-5.26773	-1.74852	-10.6879	4.1475	-6.59441	0.707968	-5.77654	-10.0532	1.22481	-11.9621	2.29581	-3.73862	-0.0503344	-9.50215	-5.94586	4.50573	-8.53098	3.91412	-1.23848	-10.1641	2.67534	-5.02536	-9.27269	6.01429	5.89141	2.88119	-0.33368	5.51101	-3.98922	-0.0704285	5.05299	2.4386	-3.44159	1.05064	-6.01605	-2.01253	-6.50549
359	-5.9409	-1.08802	-0.863124	-2.88105	4.36399	-1.61007	-6.49658	5.58958	2.3353	-2.93966	-9.70321	-9.74605	-5.30553	-2.02802	-10.6118	4.15114	-6.12838	0.861532	-6.61477	-9.99664	1.20958	-12.0454	3.2985	-5.87623	-0.479581	-9.49594	-6.00724	4.70303	-8.52558	4.03782	-1.27921	-10.1493	2.98761	-5.238	-6.80502	7.27531	5.75436	2.78825	-0.387828	7.7626	-3.35418	0.078883	3.49797	2.1721	-6.0232	0.656958	-4.55764	-3.10149	-6.14481
360	-6.3934	-1.6243	-0.751513	-0.761494	4.62392	-1.21776	-6.46749	5.15208	2.30402	-2.59846	-9.85933	-10.3983	-5.12266	-1.43502	-10.6257	4.14654	-4.82045	0.96756	-5.82404	-10.0518	-4.88455	-11.8416	1.83051	-5.95246	0.190756	-8.61622	-6.03442	4.68461	-8.37191	4.01835	-1.27957	-10.3424	2.08845	-4.75813	-7.52429	8.42048	4.33414	2.78679	-0.442914	7.68789	-3.89413	-0.112137	3.64795	3.53527	-5.89865	2.00539	-6.01062	-3.16067	-6.32687
361	-6.55182	-0.194171	-0.616792	-3.07351	4.49406	-0.581684	-6.4644	5.63187	2.3355	-2.55389	-8.06372	-10.3626	-5.1472	-2.02835	-10.693	4.14433	-5.95451	0.378553	-5.86443	-10.0576	-4.48025	-11.4634	1.60373	-5.68117	-0.320842	-9.52146	-6.0041	4.66127	-8.5311	4.86721	-1.11434	-10.1888	3.08208	-4.89686	-7.31119	8.41156	6.03111	2.51216	-0.469322	5.73478	-3.72251	-0.0936934	3.22481	3.59656	-6.10663	1.91977	-6.00153	-3.19936	-6.21357
362	-6.64028	-0.690846	-1.15711	-0.591135	4.60247	-1.53139	-7.53289	5.37747	2.33632	-2.64895	-10.0487	-9.63497	-4.49222	-1.906	-10.3169	4.13946	-6.29344	0.964187	-6.66374	-9.93411	-4.94577	-10.8924	3.32066	-4.47524	-5.03246	-9.49457	-5.91957	4.66899	-8.3185	4.16638	4.42455	-10.2602	2.56598	-4.80512	-7.72734	8.44612	5.8137	2.02708	-0.518799	7.85056	-4.0169	-0.264326	6.4263	1.89639	-3.18717	1.80312	-4.53012	-1.87906	-6.08079
363	-6.10854	-0.289518	-2.05272	1.31483	4.50839	0.30898	-6.23239	5.35079	2.30131	-2.61068	-10.0703	-9.67696	-4.41287	-1.39664	-10.6215	4.14328	-4.96384	0.0699786	-6.64271	-10.0158	-4.74012	-12.2252	1.72927	-4.26473	-7.76784	-9.49527	-5.82078	4.62885	-7.98281	-4.75355	4.13673	-10.3649	2.06167	-5.11735	-6.7847	8.45098	4.182	2.76641	-0.536755	7.69049	-3.65033	4.26444	6.52511	3.60866	-3.17916	1.64677	-4.46193	-3.11913	-6.25265
364	-6.29175	-1.17475	-0.159869	-3.25798	4.88882	-1.40159	-6.44411	5.45696	2.2965	-2.1912	-9.15867	-10.188	-5.39197	-1.81873	-10.6006	4.1484	-5.90226	0.6792	-5.9003	-10.0277	-5.04003	-10.9108	2.24963	-6.0758	-7.99939	-8.78096	-5.85636	4.65508	-8.53189	-5.67714	4.66275	-10.3861	3.05416	-4.66194	-8.69891	8.00069	6.00547	2.69994	-0.467664	7.65779	-3.44937	3.26064	4.20472	3.1713	-4.6951	0.172262	-5.89897	-2.34347	-6.6532
365	-6.63655	2.76963	-3.48785	-7.22977	4.72351	-1.41478	-7.27578	5.58556	2.33955	-2.28068	-10.6855	-9.65812	-5.01553	-1.58932	-10.6832	4.14546	-6.01036	0.876956	-5.99101	-10.0044	-4.57275	-11.7222	2.25863	-5.80629	-7.46308	-9.47306	-5.85163	4.64021	-8.01166	-5.04874	4.44324	-10.3037	2.60605	-5.14996	-6.8312	7.01604	4.02092	2.27047	-0.367709	7.74213	-3.78489	3.21422	4.59243	2.98249	-3.14374	0.265307	-4.09352	-3.17004	-6.25818
366	-6.50905	1.92233	-0.0724989	-7.74831	4.77961	-0.432227	-6.54132	5.52212	2.33556	-2.47344	-9.85354	-10.192	-5.0146	-1.39728	-10.1149	4.14363	-4.64765	0.971536	-6.72862	-10.0704	-4.59596	-10.9431	1.65547	-3.54937	-7.84007	-9.52455	-5.99008	4.61306	-8.53971	-5.72323	4.15249	-10.0253	2.03155	-4.65181	-8.89938	5.76808	5.69748	2.736	-0.280148	4.32224	-3.96302	4.37056	4.4033	2.68494	-3.15145	0.449393	-5.94409	-3.19588	-6.20938
367	-5.62083	1.51684	-1.78139	-7.10509	4.98944	0.142356	-6.4264	5.59013	2.33704	-2.3807	-7.95401	-9.72439	-4.87336	-1.93352	-10.5531	-0.43102	-5.15716	0.436094	-6.68732	-10.0566	-5.07572	-11.7785	2.98559	-4.16574	-7.75765	-9.52488	-6.02182	7.14359	-8.10503	-5.17446	4.38601	-10.2891	2.49636	-4.96609	-6.87247	6.76199	3.85143	2.80104	-4.48806	7.53572	-4.05002	4.4412	5.88306	3.04838	-4.60058	0.441054	-4.18189	-2.71465	-6.24775
368	-5.67176	0.59054	-1.50284	-7.5957	5.03155	-2.98436	-6.37507	5.51234	2.29766	-2.06348	-7.85189	-10.1173	-4.92229	-1.99718	-10.632	0.679557	-5.87972	0.830361	-6.07389	-10.019	-4.40598	-10.999	2.37052	-4.36356	-4.46064	-9.41274	-6.03327	7.14244	-8.09192	-5.0736	4.1965	-10.3602	1.99412	-4.66332	-6.92473	8.44495	5.58876	2.59971	-0.966158	5.95271	-3.66461	3.22681	3.47766	2.87747	-5.05362	0.421415	-5.81052	-1.71345	-6.11094
369	-6.4103	2.01231	-0.127883	-7.1396	4.48034	-3.63163	-6.5024	5.27772	2.32604	-2.09847	-10.1889	-9.82704	-4.73355	-1.42425	-10.6393	0.126486	-5.74672	0.606793	-5.43294	-10.0481	-4.54307	-12.1108	2.81453	-6.42083	-7.75461	-8.32717	-5.92676	7.14359	-8.01621	-6.51511	4.72918	-10.2665	2.53007	-4.69104	-6.71908	8.45745	3.66996	3.18965	-4.22662	7.6837	-3.53328	3.23313	3.26302	2.93461	-3.21488	0.513601	-5.94924	-3.1659	-5.79959
370	-6.47323	-1.3509	-3.09141	-7.10086	-0.732068	-3.81226	-6.31601	5.07729	2.29961	-3.65975	-9.84833	-10.1667	-5.22253	-1.95427	-10.4947	-0.443371	-4.71696	-7.74537	-5.50813	-10.0747	-4.82417	-8.95972	2.30478	-5.86795	-6.04254	-9.46006	-5.87568	7.14333	-8.20976	-4.89684	4.40522	-9.99552	2.42665	-5.18743	-8.83964	8.40672	5.64687	2.75318	-1.1949	4.51478	-3.91716	4.45791	4.00229	2.84956	-4.85489	0.291922	-4.03773	-3.19965	-5.96896
371	-5.57592	1.45427	-0.303552	-7.45733	-0.653101	-2.98771	-8.85841	5.28164	2.34181	-2.13642	-8.91321	-9.98995	-4.76226	-1.65193	-10.6751	-0.385993	-5.30264	-7.73334	-6.14191	-10.016	-4.99819	-8.37891	2.33668	-4.64218	-7.89746	-9.5128	-0.569567	7.14335	-8.49644	-4.93732	4.23276	7.68563	2.45817	-5.0627	-7.11045	8.40652	3.47594	3.15415	-5.58919	3.10125	-3.76033	4.43157	6.15625	2.84045	-5.28593	0.224068	-5.94839	-3.14602	1.65246
372	-7.07191	2.92911	-0.208049	-7.27206	-0.17684	-3.6456	-6.48187	5.5825	2.33754	-3.6628	-10.6945	-10.1684	-9.97555	-1.18659	-10.5713	0.689536	-5.86341	-8.08186	-6.76103	-9.99775	-4.41843	-9.06243	3.12872	-4.12316	-6.26691	-9.50228	-0.561807	7.1399	-8.49273	-5.58075	4.23129	8.14826	-8.06601	-9.57759	-6.84154	7.76149	5.51278	2.93513	-1.39314	3.12803	2.70033	3.20888	6.30852	3.00061	0.826457	-8.08878	-3.99653	6.26001	1.26208
373	-6.7533	1.34881	-2.57575	-7.24336	-0.57818	-3.75921	-6.83199	5.46164	2.30227	-3.64836	-8.66958	-10.0631	-10.6854	-1.83963	-10.6422	0.559051	-5.43945	-7.71558	-6.2332	-10.07	-4.45414	-9.188	2.37237	-6.23246	-4.1675	-9.52438	-0.596453	7.13781	-8.359	-5.13888	4.50856	8.39416	-8.19616	-9.20699	-8.86703	8.40046	5.42152	3.07166	-3.96643	3.11125	2.54818	3.26417	3.72869	2.90027	2.94634	-8.09083	-5.28463	6.30189	1.71233
374	-6.82482	0.401993	-2.31229	-7.1001	-0.787667	-3.22535	-8.54814	4.91842	2.32252	-3.62687	-9.91341	-10.4487	-8.93921	-1.99333	-10.3302	-0.851266	-4.64851	-8.38122	-6.84045	-10.0669	-4.68431	-9.18378	3.23191	-5.88045	-7.80429	-8.46602	-0.581803	7.14041	-8.30573	-5.17783	4.33768	7.22513	-7.64597	-9.70567	-6.79698	8.41065	3.29175	2.60177	-3.50432	3.10385	2.60845	3.65446	-11.0646	2.9297	-0.414646	-8.08639	-5.44414	6.29059	1.76569
375	-5.55328	2.59236	-0.252238	-7.33227	-0.177903	-2.99128	-6.40545	5.54941	2.34134	-3.63585	-10.3238	-10.0664	-10.703	-1.45016	-10.6157	-0.420507	-8.4289	-7.62551	-5.59143	-10.08	-5.03962	-9.16205	2.04046	-4.84903	-7.92634	-9.48712	-0.549491	7.14137	-8.50663	-5.64561	4.6758	7.33684	-8.40627	-8.23926	-6.65136	8.46852	3.1157	2.75026	-5.37269	3.10157	2.52762	3.34092	-10.4648	2.83931	2.77734	-8.08808	-5.10009	6.04519	1.15424
376	-6.93805	-1.07852	-2.8352	-7.28967	-0.868802	-3.12486	-6.31464	5.54788	2.32516	-3.64398	-9.84666	-10.369	-8.77458	-1.28067	-10.7354	0.632111	-7.21289	-7.68121	-6.80196	-10.0391	-4.37141	-8.54335	2.41724	-4.05716	-7.9003	-9.52383	-0.699089	7.14201	-8.53377	-6.29038	4.40237	7.48905	-8.11223	-9.12902	-8.56434	8.44491	5.1577	2.54467	-3.72749	3.10376	2.63691	4.45397	-11.0538	-4.19358	1.21678	-8.08741	-3.89552	6.30047	1.03742
377	-6.79576	0.184751	-0.0609305	-7.31238	-0.430844	-3.6028	-6.67048	4.81797	2.33527	-3.62929	-9.84275	-10.0534	-10.0567	-1.72466	-10.6429	0.545438	-5.95437	-7.59202	-6.31976	-6.16065	-5.04713	-8.92404	2.18803	-4.65146	-5.80496	-9.2159	-0.686422	7.14223	-8.53797	-5.19498	4.35733	7.90643	-8.16033	-6.84687	-8.80189	6.51392	5.30036	-3.87281	-5.45214	3.12247	2.48072	3.47348	-11.0672	-3.41465	3.10631	-8.08765	-3.95076	0.142496	1.7963
378	-5.564	1.79202	-0.604281	-7.09406	-0.863738	-3.73692	-6.38256	5.09018	2.31336	-3.73558	-10.4226	-10.0541	-9.10633	-1.54419	-10.6111	-0.743975	-6.9583	-7.54522	0.618091	-6.19819	-4.81924	-8.4449	2.66112	-4.9277	-7.7239	-8.20031	-0.73364	7.1422	-8.51017	-5.48127	4.33585	9.17649	-7.68508	-9.6905	-6.96945	8.40916	-5.23881	-3.99522	-3.30631	3.10481	2.60234	4.38677	-11.0502	-1.44781	1.38465	-8.08616	-5.58066	1.97337	0.843541
379	-6.57114	3.17783	0.00998632	-7.22008	-0.972063	-3.03008	-9.16695	4.81119	2.33412	-3.6885	-9.91855	-5.98993	-10.6915	-1.98161	-10.4105	-0.420707	-8.61569	-7.39672	0.622429	-6.22872	-4.5513	-9.14842	1.72011	-3.88815	-5.5565	-9.50105	-0.721529	7.14267	-8.52783	-4.77742	4.29967	9.2531	-7.95858	-9.5547	-8.70917	8.47186	-5.2744	-3.94214	-0.835291	3.11641	2.44197	3.25089	-11.0689	-4.18644	-0.212962	-8.08167	-5.69827	0.840897	1.81001
380	-6.77395	1.58625	-0.469206	-7.08776	-0.259281	-3.53085	-6.48213	5.41908	2.32376	-3.66795	-8.43138	-6.06977	-10.1643	-1.92974	-10.5694	-0.438236	-7.42461	-7.60879	0.617976	-6.26256	-4.43617	-9.26003	1.88146	-3.40982	-6.93428	-8.08942	-0.70907	7.13499	-8.52715	-5.24314	4.41674	9.32918	-8.51458	-8.02718	-6.90177	8.40074	-5.33531	-3.88983	-5.40672	3.09534	2.72084	3.2854	-10.6586	-4.17292	3.28447	-8.08238	6.78104	-0.258896	0.617703
381	-8.393	2.233	-3.30661	-7.12238	-0.338736	-3.06917	-7.02883	5.21973	2.31928	-3.74732	-9.8652	-8.47172	-8.48589	2.0924	-10.6568	0.479628	-5.99601	-7.47725	0.626497	-5.99822	-5.08543	-8.9313	2.53362	-5.19543	-7.1872	-9.52592	-0.640001	7.14431	-8.52139	-6.09411	4.55177	9.43265	-7.73782	-9.55983	-6.89203	7.52581	-5.35577	-4.02491	-3.11126	3.12973	2.38999	3.27312	-11.0707	-1.76534	-0.613591	-8.0752	7.53292	2.90156	0.357655
382	-8.5599	1.20028	-3.4545	-7.08292	-0.868109	-3.70911	-8.25054	4.87218	2.33643	-3.47706	-10.5179	-9.62756	-9.71519	1.71367	-10.6716	0.549847	-7.18949	-8.28778	0.61778	-6.03787	-5.08367	-8.35749	2.21042	-4.4129	-7.76658	-9.31853	-0.624716	7.13706	-8.5278	-6.19725	5.57404	8.61732	-8.11129	-9.05827	-8.14155	8.38563	-5.36228	-3.97379	-0.73162	3.095	2.6764	3.79473	-10.5687	-3.67287	-1.13784	-8.07773	7.56811	2.21643	0.0955907
383	-7.63238	1.65634	-0.222634	-7.90204	-1.02413	-3.10085	-6.24574	4.95749	0.0314951	-3.57115	-9.84083	-10.1425	-10.7072	1.29155	-10.5625	-0.5645	-6.07211	-7.15365	0.622446	-6.05411	-4.47062	-9.38784	1.54703	-3.76534	-7.95061	2.93234	-0.610855	7.14352	-8.52501	-4.63592	5.3796	8.81635	-8.6403	-9.65202	-7.12874	8.42746	-5.37722	-3.89942	-2.93866	3.14856	2.33946	3.2993	-11.0556	-3.55237	1.7459	-8.08819	7.43545	2.43477	-0.378104
384	-7.91585	-0.293127	-0.367325	-7.185	-0.322354	-3.05769	-6.53746	5.05045	0.0871224	-9.85608	-3.98477	-7.9081	-9.87354	2.13609	-10.565	-0.375795	-7.56149	-7.603	0.617622	-6.1038	-4.80105	-9.51704	2.23218	-3.27304	-7.87992	3.14087	-0.672998	7.13475	-8.51876	-5.18148	4.67388	8.97105	-8.01479	-9.57614	-8.36578	6.26373	-5.42906	-4.0174	-5.36053	3.10241	2.83457	4.11692	-11.0618	-1.57321	3.45011	-8.08781	7.06275	2.59616	-0.158194
385	-8.17961	2.4171	-0.448553	-8.05891	-0.21722	-3.18388	-8.00888	5.01314	0.0270442	-9.88854	-7.05512	-9.99407	-10.7236	2.15161	-10.668	-0.10673	-8.57288	-7.61241	0.622843	-6.25563	-4.3867	-8.9221	1.59005	-3.64048	-5.30397	2.75744	-0.657484	7.14405	-8.51875	-5.86057	4.85961	9.08654	-8.17842	-7.81451	-7.04735	8.42648	-5.48155	-3.89597	-2.40129	3.13897	2.31285	3.97991	-10.7787	-2.54384	2.26016	-8.0918	6.90187	0.0422285	-0.541755
386	-6.99501	1.0119	-0.0104474	-7.02811	-0.234394	-3.72783	-6.43044	4.92006	0.0403085	-9.91789	-7.30974	-6.84934	-9.91157	1.75965	2.67009	-0.333293	-7.2181	-7.98954	0.621942	-6.1578	-4.96343	-8.37268	1.55538	-4.21524	-7.73416	3.34931	-0.816668	7.13382	-8.52824	-6.45309	5.30697	8.94076	-7.66484	-9.69766	-6.88857	8.42013	-5.6137	-3.91201	-5.51811	3.13921	2.78482	-0.243292	-11.0518	-2.78427	-0.7974	-8.09393	7.26213	1.75983	-0.677819
387	-7.19509	-1.8452	-1.23563	-8.20222	-0.808159	-3.23214	-6.46591	4.97562	0.139142	-9.95898	-7.55317	-5.96129	-8.62241	1.40396	4.11304	-0.627697	-6.17355	-8.13946	0.623362	-6.07064	-4.92822	-8.89911	2.2959	-5.46005	-6.47827	2.53011	-0.832763	7.14311	-8.52419	-5.31148	5.56427	8.98626	-7.89271	-7.60399	-7.92475	5.76316	-5.77199	-3.89453	-2.59306	3.10887	2.31873	-0.25068	-11.0626	-4.12149	0.21743	-8.09717	7.59853	2.79491	-0.771605
388	-7.37651	-0.549723	-3.53104	-7.01495	-0.200986	-3.07258	-8.07417	5.18546	0.0341545	-10.0433	-6.60728	-10.0546	-10.5749	1.65978	0.541286	0.445164	-7.30015	-7.85849	0.617934	-5.94799	-4.68192	-9.50243	2.22822	-3.13604	-7.97806	2.46217	-0.849752	7.14452	-8.52673	-5.35582	4.69336	6.50503	-8.77095	-9.53636	-6.97373	8.42402	-5.97407	-3.95907	-5.67203	3.12669	2.31286	-0.966075	-11.047	-4.15055	-0.98134	-8.09175	7.5055	1.97269	1.61113
389	-1.86289	0.781966	-3.54702	-7.14835	-0.7176	-3.65459	-7.50227	4.98893	0.107795	-9.95932	-7.78236	-8.98947	-9.6159	2.17818	4.33022	-0.301351	-8.60451	-7.61024	0.618702	-6.29162	-4.3517	-9.40781	-0.303472	-3.52942	-4.75579	2.632	-0.866391	7.14709	-8.52926	-5.35746	4.85613	9.05013	-7.99634	-9.54111	-9.44926	8.63583	-6.22183	-3.92282	-2.75855	3.10706	2.35242	-0.142101	-11.0633	-1.9763	3.89266	-8.08914	7.64666	0.624479	-0.849522
390	-1.09421	-1.61162	-0.987031	-7.00299	-0.712818	-3.44311	-8.81324	-5.42117	0.0404074	-9.96445	-3.70358	-6.12773	-10.6729	1.80968	2.41494	0.150365	-7.72539	-7.70828	0.624207	-6.3042	-4.67396	-8.65734	0.24391	-5.72655	-6.70488	2.44655	-0.748851	7.14319	-8.5198	-4.63638	5.73484	6.3035	-7.88513	-8.94509	-9.48961	8.37171	-6.47791	-3.98071	-5.51848	3.10719	2.33456	-0.643915	-11.0066	-2.33087	1.91915	-8.08304	6.62817	-0.333024	-0.843663
391	-2.51186	3.0607	-3.5276	-7.02824	-0.459798	-3.59659	-7.84757	-7.83957	0.0256027	-9.97874	-6.82995	-9.76785	-9.39038	1.34716	2.14578	0.488118	-7.27939	-7.83613	0.617905	-6.30895	-4.80811	-8.76762	-0.206082	-4.03962	-7.71095	2.43253	-0.761327	7.14286	-8.52625	-5.98202	4.71049	9.11625	-7.85577	-8.80169	-9.44829	8.52425	-6.70903	-3.89084	-1.59111	3.38705	2.96725	-0.523095	-10.8782	-3.23442	2.08013	-8.0778	6.66886	-0.14262	1.53021
392	-1.79088	2.12552	0.0411851	-8.36266	-0.253143	-3.03325	-8.73186	-7.05248	0.123593	-9.91553	-3.56265	-7.62906	-10.6801	1.88045	0.284508	-0.506161	-7.9115	-7.63168	0.621259	-5.95552	-5.12452	-9.29947	0.198182	-1.16688	-7.98563	2.61518	-0.774708	7.14212	-8.52455	-6.37503	5.44271	9.21939	-7.91175	-9.56058	-9.48129	8.50051	-5.61182	-3.88398	-5.27247	4.11385	2.87581	-0.833365	-11.0473	-4.14947	3.5957	-8.07861	7.46858	0.316211	1.50088
393	-2.66361	-0.0426248	-0.777946	-7.10108	-0.460106	-3.86422	-8.14846	-6.47855	0.0245415	-9.96196	-7.99793	-10.1507	-10.7054	1.57998	3.62982	-0.147085	-8.45011	-5.32441	0.618382	-5.96254	-4.93754	-8.84154	0.303593	-1.40026	-2.50725	2.51336	-0.789358	7.14196	-8.52448	10.6035	4.86316	9.43312	-8.00869	-7.38445	-9.37724	8.28308	-6.88939	-3.87756	-5.02058	3.50843	2.39979	-0.220025	-11.0748	-2.15484	3.7474	-8.08998	7.57425	-0.369522	1.57455
394	-2.35879	-0.812932	-7.27837	-7.09342	-0.334578	-3.29288	-7.98359	-7.31761	0.0398128	-9.96929	-3.53849	-6.40903	-9.80218	1.57206	0.049801	0.403819	-6.2884	-5.51035	0.620252	-5.91955	-5.45473	-6.72532	-0.0900033	-1.60716	-3.63092	2.76725	-0.802878	7.14327	-8.51528	10.7484	5.64219	7.05054	-8.27768	-9.6886	-9.48375	8.62237	-6.08857	-3.96347	-1.78444	4.09694	2.97951	-0.166701	-11.0725	-3.02803	0.422164	-8.0904	7.51185	2.62774	-0.838697
395	-1.03571	1.59495	-7.18847	-8.50393	-0.850712	-3.37236	-8.16916	-5.38178	0.17243	-9.98377	-6.36499	-5.89625	-10.7255	2.01414	3.91874	0.399565	-8.23665	-5.27715	0.621164	-5.96241	-5.028	-8.02111	-0.526491	-1.79459	-3.06651	2.69185	-0.970948	7.14281	-8.52659	10.7093	4.72879	6.9133	-7.76556	-7.17799	-9.4858	8.48181	-5.11263	-3.89108	-1.98871	3.46302	2.85578	-0.185633	-11.0581	-4.02056	-1.30466	-8.08589	7.34077	2.68057	1.47289
396	-0.975636	3.29625	-7.12685	3.35557	-0.36565	-3.90373	-7.25387	-6.22875	0.0281317	-9.9796	-8.23899	-9.24513	-10.6778	1.60628	1.88557	0.589861	-8.10862	-5.47632	0.62237	-5.81083	-4.63709	-6.94257	0.0528321	-0.524593	-3.1053	2.74252	-0.985823	7.14194	-8.52102	10.8206	4.90292	7.14829	-8.13815	-9.43236	-9.44394	8.59833	-5.36703	-3.97388	-4.75686	4.13649	2.37914	-0.12692	-11.0607	-3.99889	2.42563	-8.08365	7.46459	-0.0645229	1.4668
397	-1.82871	1.89704	-9.43898	3.21594	-0.592572	-2.98924	-8.62661	-7.76869	0.158828	-9.94885	-8.49178	-6.31035	-9.2538	1.58335	-1.29616	-0.457498	-6.42626	-5.37145	0.620532	-5.75502	-4.68601	-6.33499	-0.417112	-0.236201	-2.43755	2.81363	-0.886279	7.14377	-8.51847	10.8896	4.75304	7.09674	-7.91023	-9.57194	-9.49699	8.46066	-7.03469	-3.88727	-2.19302	3.57786	2.89809	-0.236679	-11.0598	-4.0428	0.624457	-8.08354	7.42957	2.89654	1.40566
398	-1.86425	1.74257	-7.22356	3.77159	-0.574383	-3.59644	-8.3874	-6.76416	0.179649	-9.89895	-5.84747	-8.19403	-10.659	1.95153	5.56483	3.92161	-8.31785	-5.47914	0.622287	-5.74666	-4.84431	-7.7786	-0.076846	0.46775	-3.76528	2.81342	-0.904452	-5.71126	-8.52932	10.8915	5.50062	6.66427	4.74072	-8.62064	-9.44378	8.16612	-4.89142	-4.05719	-3.30376	4.12623	2.82017	-0.416186	-11.0705	-0.952807	4.01019	-8.07597	6.80047	1.53807	1.43896
399	-0.946562	5.83021	-9.67042	3.70763	-0.509897	-9.6107	-7.35619	-5.30304	0.0237719	-9.7676	-3.46886	-9.88612	-10.295	1.62965	-0.196039	4.49561	-8.03843	-5.47262	0.619601	-5.76489	-4.70108	-7.91841	0.0454328	-0.785116	-3.09765	4.0069	-0.923411	-1.44508	-8.52147	10.7733	4.647	6.99737	4.75988	-9.65167	-9.4981	8.56459	-4.73813	-3.85999	-3.25339	3.98779	2.48942	-0.308781	-11.0561	-0.555542	1.02392	-8.08087	7.68238	0.438245	1.33699
400	-1.84992	4.56852	-7.16046	3.37672	-0.239989	-9.90294	-6.9505	-7.57246	0.047203	-9.98802	-3.37555	-10.1959	-10.6669	2.06423	3.51417	3.95399	-5.93566	-5.07064	0.620851	-5.83957	-4.8157	-7.14287	-0.21314	-0.615402	-3.09772	4.08135	-0.941127	-1.59407	-8.51687	10.739	4.78904	6.79853	4.95514	-9.30306	-9.49647	8.54432	-5.8582	-3.85307	-3.1956	3.23998	2.94183	0.0175102	-11.0557	-4.23123	2.60721	-8.08364	6.67773	2.40908	1.29684
401	-0.946588	1.95371	-9.58627	3.37493	-4.64057	-9.35376	-7.07165	-5.85151	0.180928	-9.94377	-8.74868	-7.3499	-9.51233	1.63779	5.01899	4.54348	-6.57659	-5.4835	0.622355	-5.975	-5.38235	-7.61928	0.193341	0.474588	-3.69564	4.17888	-0.959907	-5.51933	-8.52651	10.8113	5.55001	-4.38901	4.76244	-6.99069	-9.47553	-9.0453	-4.76159	-4.07899	-1.72934	4.07165	2.76989	-0.0343047	-11.0562	-0.753926	-1.63394	-8.08194	7.46211	1.27749	1.33173
402	-0.986288	1.77133	-9.05441	3.64885	-4.91456	-10.0112	-7.89404	-5.17329	0.0210927	-9.95046	-6.10528	-6.62354	-10.4276	1.62731	3.76185	4.01862	-8.48494	-5.41708	0.621366	-6.0188	-5.08576	-7.3874	0.0459961	-0.600181	-2.74244	4.25969	-6.33858	-3.95232	-8.52532	10.6665	4.96375	-4.3848	4.76982	-8.43621	-9.39203	-8.79208	-4.8784	-3.85963	-3.14333	3.32355	2.43578	0.0593128	-11.0716	-3.79533	-1.68669	-8.08471	7.56368	-0.100797	-9.95855
403	-1.87604	4.19968	-7.39676	3.32515	-4.87646	-9.49227	-8.4074	-6.02383	0.174143	-9.70455	-3.24498	-9.4872	6.43294	1.61488	-0.454555	4.64094	-7.82491	-4.98506	0.623514	-5.98422	-5.48774	-6.5185	-0.209504	-0.800291	-3.11646	4.33487	-7.43474	-1.08201	-8.52258	10.6656	4.81393	-4.38362	4.85381	-8.86133	-9.47001	-8.85616	-4.79034	-3.87418	-3.39452	4.03065	0.20213	-1.14702	-11.0567	-3.9178	-1.77288	3.70411	6.76679	0.247824	-7.573
404	-1.04936	2.99534	-7.4035	3.34631	-4.47744	-9.4676	-7.46544	-7.77926	0.0355107	-9.93153	-5.60434	-5.90874	5.92917	1.60408	1.35279	2.85397	-6.74725	-5.51622	0.621394	-5.96232	-5.2217	-7.57438	-0.0880806	0.413237	-3.05718	4.38545	-7.27417	-5.27308	-8.51549	10.8802	4.61959	-4.38103	4.57994	-8.68907	-9.49732	-8.92155	-4.9188	-4.07109	-1.81194	3.87785	2.97912	0.117288	-11.0738	-1.30422	-1.89013	3.6992	7.40658	1.05157	-7.3319
405	-1.91765	5.38645	-8.87287	3.56436	-4.90809	-9.92634	-7.09189	-7.90194	0.0387178	-10.0093	-9.0154	-8.736	5.86621	1.46552	1.62395	4.53405	-7.32759	-5.46083	0.619876	-5.95711	-4.63819	-7.71091	0.155296	-0.968627	-3.81148	4.39981	-7.38019	-1.28107	-8.52948	10.9319	5.53095	-4.39116	4.89897	-8.85151	-9.48289	-9.05931	-5.11865	-4.01203	-3.3502	3.94724	0.357464	0.113635	-3.05589	-1.13324	-2.02607	3.66733	6.82782	-0.185765	-7.13979
406	-1.87689	4.40241	-9.23998	2.84307	-4.95807	-9.62688	-7.81218	-5.09317	0.0243658	-9.96666	-3.11902	-7.09078	6.43201	2.18249	5.28535	4.05751	-7.14832	-5.44466	0.626907	-5.97266	-4.77232	-7.12674	-0.468967	-0.472836	-2.68217	4.37658	-7.19084	-3.38659	-8.51718	10.6068	5.03473	-4.39096	4.65801	-8.67519	-9.48532	-8.77395	-4.97661	-3.86667	-2.07165	3.91752	2.89072	0.0895505	-5.02894	-3.85885	-1.93955	3.6792	7.04256	2.21747	-9.89627
407	-1.15883	1.93158	-7.3201	3.60667	-4.5117	-9.36562	-7.27799	-7.81724	0.0227808	-9.96235	-9.28238	-10.1998	5.8148	1.59153	-1.10795	2.80287	-7.21002	-5.21174	0.619253	-5.96886	-5.30999	-7.36447	0.444771	-1.88055	-3.05133	4.33012	-7.37641	-5.07665	-8.51428	10.6308	4.83135	-4.38945	4.81351	-8.84131	-9.4922	-8.82506	-5.19418	-4.03078	-1.93351	4.01414	0.513275	-1.02091	-3.17997	2.79042	-2.30103	3.64515	7.67939	2.71539	-9.74364
408	-1.15288	1.81836	-9.76056	3.07565	-4.91902	-9.76499	-8.73843	-5.70253	0.0434981	-9.84106	-5.35232	-6.22402	5.78973	2.19527	3.14136	4.3956	-6.98758	-5.52893	0.622763	-1.86937	-5.00802	-6.88365	-0.567456	0.212102	-2.5832	4.21926	-6.22177	-4.23103	-8.51864	10.9444	5.56902	-4.38615	4.53336	-8.66713	-9.34791	-9.02014	-5.03569	3.23798	-2.92037	3.92489	2.96124	-0.14976	-4.13425	2.72564	-1.81599	3.63431	7.20312	10.0957	-9.57166
409	-1.85496	5.59727	-8.03121	2.94932	-4.76027	-9.77114	-7.03103	-7.89514	0.014081	-9.96687	-5.09695	-10.0728	6.41064	1.62514	1.07431	2.94645	-7.27571	-5.46659	-9.49014	-1.68655	-4.57391	-6.67626	0.329841	0.298307	-3.10164	4.10904	-6.07651	-4.88478	-8.51564	10.5761	5.11831	-4.37348	5.09687	-8.84226	-9.49746	-8.84271	-7.41483	2.79159	-2.85726	3.90693	0.718053	-1.2689	-3.47448	2.66658	-2.44666	3.62507	7.73839	10.0984	-6.99204
410	-1.44693	2.71995	-7.40846	3.36069	-4.78549	-9.41193	-8.53701	-5.04351	0.0335881	-9.95889	-2.99164	-5.51106	6.36402	2.18407	2.91001	4.19361	-6.88526	-5.14706	-9.67313	-0.927865	-5.51642	-7.82513	-0.346943	-1.38432	-2.63393	3.90843	-6.07389	-3.66772	-8.52134	10.9501	4.84075	-4.37098	4.52735	-8.74846	-9.48298	-8.63062	-7.70906	2.6514	-2.79028	3.90237	2.97884	-0.0712339	-3.26198	2.98966	-1.71552	3.60087	6.90269	10.6214	-6.99201
411	-1.29337	1.90965	-8.31344	3.45414	-4.96714	-8.10557	-8.81033	-7.89754	0.0469626	-9.95273	-9.55635	-5.45497	5.71959	1.5281	4.56067	2.85751	-7.07015	-0.453014	-9.73287	-0.948019	5.58177	-6.52599	0.554336	-1.1919	-2.8267	4.02287	-7.2031	-4.50585	-8.26987	10.861	5.56764	-4.36961	4.98405	-8.90325	-9.46977	-8.88453	-7.4111	3.42602	-3.09684	3.90618	2.89859	-1.23765	-3.67994	2.88021	-2.15103	3.6154	5.98556	10.104	-9.43451
412	-2.21618	2.43564	-7.38693	3.51748	-4.96885	-8.46147	-7.67584	-5.57127	0.0446919	-9.99872	-4.8279	-5.34591	6.32489	-8.22351	-0.704201	4.03798	-6.78795	-1.8421	-9.71961	-1.46228	5.62203	-6.41186	0.522064	0.362555	-3.06883	3.53772	-6.19454	-4.61658	-8.36337	10.7037	5.21436	-4.3669	5.32793	-8.72931	-9.48458	-8.81245	-7.35174	2.68335	-3.05654	3.91859	0.92316	-1.17277	-4.8217	2.95685	-1.62103	3.33356	9.47293	10.1888	-9.40371
413	-2.10033	2.19461	-9.7552	3.44797	-4.97284	-8.49909	-7.67252	-4.97598	0.0636271	-9.89934	-4.27003	-5.20536	6.29054	-9.42624	3.34858	3.11009	-6.71744	-0.856996	-9.68034	-0.0582232	5.61989	-7.81014	-0.655885	0.418145	-2.89309	3.73755	-6.88739	-4.7681	-8.26171	10.5713	4.85676	-4.37862	4.89055	-8.86935	-9.48622	-9.1352	-7.44682	3.35131	-3.00823	3.9451	2.92989	-0.180216	-4.46424	2.64313	-1.64739	3.34075	8.01569	10.0965	-9.4795
414	-1.21043	5.17178	-8.61093	3.83212	-4.62543	-8.04762	-8.26054	-4.92165	-4.12113	-9.9969	-4.55962	-5.0648	6.28807	-7.44756	0.792961	3.94027	-7.47227	-1.77567	-9.52586	-0.261004	5.45402	-6.25361	-0.607244	-1.0087	-3.27805	-8.78406	-6.78766	-1.90707	-8.3612	10.9557	4.71715	-4.37755	4.55919	-8.71098	-9.48453	-8.60329	-7.65768	3.55703	-2.9697	4.10327	1.13493	-0.226442	-4.19005	2.13873	-2.08523	3.73358	8.18331	10.3067	-9.57806
415	-1.59314	1.69177	-9.7641	3.42442	-5.02043	-8.70833	-8.6077	-7.8715	-4.47275	-9.93678	2.85598	-4.97635	5.79203	-8.80263	-0.915647	4.9287	-7.45591	-0.968343	-9.7259	-0.973597	5.81057	-6.33062	0.528606	-0.419682	-2.78672	-8.53101	-6.47605	-5.01889	-8.28217	10.9616	4.59705	-4.37555	4.80737	-8.88693	-9.48057	-8.8632	-7.48616	2.66641	-2.24982	3.6411	2.99402	-0.814268	-3.55229	2.0754	-2.72318	3.71935	5.74858	10.4368	-9.70411
416	-1.14688	4.055	-7.32937	3.88122	-4.93599	-10.1354	-7.7934	-5.46103	-4.08873	-9.97175	2.89706	-4.91635	6.22617	-7.21614	4.77759	3.30209	-7.46635	-1.85112	-9.74412	-1.27119	5.40104	-7.72078	0.336853	-1.9501	-3.18222	-4.87716	-6.72026	-1.74957	-8.37092	10.579	4.97703	-4.35462	5.20888	-8.69953	-9.48299	-9.03039	-7.24484	2.79418	-2.24906	4.12752	2.9327	-0.710081	-4.60273	2.15544	-2.66895	3.72074	9.2842	10.0958	-9.78489
417	-1.20533	1.88279	-7.37688	3.47954	-4.97064	-8.30399	-7.15883	-7.84499	-4.45493	-9.95859	2.69826	-4.94022	6.05776	-9.11293	6.99966	4.87484	-6.63538	-0.42071	-9.72102	-0.446341	5.76286	-6.13687	-0.637082	-0.120848	-3.41463	-5.87036	-6.87114	-5.49085	-8.27623	10.9111	4.84505	-4.35407	4.60096	-8.79664	-9.49211	-8.9869	-7.68712	3.00334	-2.29939	3.69873	1.33491	-1.03271	-3.38993	1.97547	-2.3769	3.38744	6.22756	10.1289	-9.78065
418	-1.71623	3.85292	-7.35992	3.43957	-4.52764	-8.08079	-6.44805	-4.87666	-4.2845	-9.99767	2.77636	-5.03725	6.36309	-7.7439	8.62731	3.5008	-7.42927	-1.09697	-9.46913	-1.7466	5.48667	-7.78158	-0.665526	-2.08712	-3.10958	-7.61845	-6.55845	-2.24722	-8.36653	10.6298	4.72387	-4.39431	5.44909	-8.94302	-9.42812	-8.97081	-7.60802	2.88925	-2.53922	3.96203	1.52552	-0.832197	-4.28657	2.30778	-2.74129	3.41424	9.10569	10.535	-7.81961
419	-1.99454	1.72446	-7.56194	3.96911	-4.90783	-8.82732	-6.25003	-5.43982	-4.43808	-9.87223	2.97669	-5.17692	6.15716	-7.32925	6.77594	3.67302	-6.57089	-2.15981	-9.70699	-0.578048	5.82548	-6.18054	0.452919	0.00623014	-3.34452	-3.81853	-6.69409	-2.07353	-8.38237	10.581	4.60036	-4.35714	5.09647	-8.62542	-8.217	-9.11827	-7.51633	3.18108	-2.40622	3.76343	1.71434	-0.234026	-3.92691	2.24418	-2.23547	3.46268	8.34023	10.556	-9.71905
420	-9.40376	4.76301	-9.75736	3.43122	-4.81833	-8.94628	-6.10758	-7.45416	-4.41874	0.825154	3.05898	-5.47181	6.41247	-10.0671	8.47588	4.75818	-7.39004	-0.357019	-9.71524	-0.654695	5.40446	-6.05324	-8.36555	0.1139	-2.94581	-8.2313	-6.92934	-5.25467	-8.37641	10.9435	4.96508	-4.39465	4.67555	-8.78136	-8.49161	-8.67398	-7.62672	3.50417	-2.64956	4.06079	2.11309	-0.793397	-4.27956	2.17209	-2.49493	3.42541	5.31783	10.1019	-9.73206
421	-9.37691	6.03471	-7.3287	3.45111	-4.88114	-8.19185	-6.4256	-7.08213	-4.92901	-0.696209	2.85585	-5.34565	6.08367	-8.50011	6.53062	3.84751	-6.45017	-0.574365	-9.72544	-1.896	5.87184	-6.11939	-8.55671	-1.62213	-3.57269	-3.99427	-6.64747	-2.64597	-8.39091	10.8353	4.83308	-4.35679	5.40936	-8.6104	-8.77449	-9.00319	-7.80109	2.73643	-2.721	3.82687	1.92411	-0.465584	-3.17206	2.18391	-2.72345	3.47338	7.63132	10.42	-8.34609
422	-6.52408	3.58338	-9.76768	3.47314	-4.82684	-9.23452	-6.31782	-7.18941	-4.18203	1.1765	2.77218	-5.54197	6.19239	-7.57463	4.86371	4.5881	-7.40327	-1.89969	-9.73408	-0.697553	5.84356	-6.10082	-8.47523	5.89382	-3.4923	-5.16701	-6.5531	-2.43533	-8.38663	10.9387	4.69711	-4.36013	4.98987	-8.97536	-7.8404	-9.12842	-7.53404	3.30508	-2.19683	8.95759	2.46583	-1.11821	-4.37499	2.29081	-2.57357	3.34819	9.68397	10.098	-8.60193
423	-6.31974	1.85343	-9.77947	4.05215	-5.02911	-8.19115	-6.11068	-6.15835	-4.39887	0.542239	3.16732	-5.55296	6.00418	-9.75118	8.32044	4.02764	-6.50471	-2.31511	-9.48046	-1.95963	5.47488	-6.18317	-8.57067	5.89359	-3.00957	-8.76009	-7.11437	-5.71198	-8.3949	-1.69336	4.55811	-4.36239	4.78794	-8.91187	-9.04074	-8.65487	-7.56806	3.4315	-2.28338	8.77013	3.10598	-1.33699	-3.05239	2.40964	-2.61887	3.36199	7.83042	10.0936	-8.07745
424	-6.42428	2.04172	-7.7977	3.38441	-4.70801	-9.54461	-6.1718	-7.38102	-4.43388	-0.767875	2.67744	-5.61999	5.54483	5.09095	6.29718	3.95923	-6.35437	-0.501883	-9.43773	-0.854914	5.74631	-6.0771	-8.39009	5.88779	3.7148	-6.05706	-7.18537	-3.1236	-8.32459	-3.1495	4.94945	-4.36481	4.91912	-8.93041	-8.00951	-9.07692	-7.53994	3.20728	-2.35845	8.82465	-0.379259	-0.663858	-3.56787	2.39934	-2.66746	3.36873	9.90582	10.0928	-8.85877
425	-9.43719	6.1628	1.18756	3.40076	-4.71585	-8.32655	-6.16819	-5.18378	-5.16191	-0.24564	3.28193	-5.60471	5.53243	4.98168	8.14062	4.75868	-7.43729	-2.06792	-9.72844	-1.42642	5.73043	-11.6707	-8.48085	5.88509	3.59133	-9.2147	-7.31658	-5.93471	-8.31543	-4.79478	4.8247	-4.39172	5.18899	-8.76441	7.00214	-8.74531	-7.73755	3.02034	-2.42942	8.859	2.30958	-1.19226	-3.64461	2.43441	-2.31704	3.38345	5.52218	10.4963	-9.74072
426	-9.53551	4.958	1.22111	4.08734	-4.56305	-8.63097	-6.33344	-7.17376	-4.5863	1.29702	2.97581	-5.51145	5.91637	5.03456	5.35533	4.05935	-6.40204	-1.82305	-9.66996	-1.32307	5.80216	-9.91941	-8.55711	5.94367	3.60777	-7.3171	-7.1117	-2.8718	-8.39148	-1.36949	4.67794	-4.39268	5.17962	-8.64517	7.07584	-9.09301	-7.52393	2.84802	-2.42144	8.97851	3.13339	-0.0187605	-2.91161	2.19216	-2.57725	3.55951	8.78091	10.0998	-9.08914
427	-9.60546	-2.92346	1.04979	-6.93187	-4.9134	-8.05778	-6.37934	-6.96885	-4.41415	1.35724	3.03681	-5.58466	5.67713	5.00662	6.06441	4.86677	-7.46105	-1.22901	-9.60408	-0.741457	5.42849	-9.94839	-8.38431	5.82411	3.86282	-5.42784	-7.18852	-5.96804	-8.32065	-3.38376	4.5807	-4.39145	5.04109	-8.64338	7.13645	-8.93901	-7.53634	3.36394	-2.37084	8.77692	-0.266163	0.170047	-3.64612	2.35029	-2.61987	3.56887	7.19248	10.6275	-9.48433
428	-9.71745	-2.85062	1.05087	-6.79881	-5.10485	-9.84605	-6.18273	-5.99689	-4.74759	-0.461864	2.72764	-5.38485	5.59121	5.06118	7.94156	4.93742	-7.47396	-0.703036	-9.6288	-0.713187	5.53179	-11.301	-8.46858	5.90191	3.8149	-8.94342	-7.32157	2.35427	-8.31247	-5.03389	4.914	-4.39387	5.13104	-8.82836	7.24196	-8.72016	-7.53805	2.97824	-2.2949	8.8324	3.04039	-1.26596	-3.31274	2.72525	-2.17224	3.58179	5.11599	10.6597	-9.30235
429	-9.82792	-2.84405	1.23509	-6.87038	-4.60258	-10.2555	-6.26141	-7.46551	-4.35683	0.473727	3.36111	-5.26323	5.60237	5.09997	5.84368	10.6607	-6.30993	-2.26546	-9.73136	-1.50758	5.82104	-9.60404	-8.4779	5.94747	3.69578	-4.14181	-7.92832	2.25914	-8.39939	-1.54171	4.80965	-4.39378	-8.71882	-8.6358	6.91298	-8.95352	-7.52749	3.03736	-4.20764	8.86305	2.73515	-0.742938	-3.3008	1.72106	-2.58451	3.58875	6.96389	10.0972	-9.66608
430	-9.72511	-2.7755	1.18301	-7.00396	1.02258	-10.1812	-6.33851	-7.15672	-4.63273	-0.37753	2.63933	-4.99359	5.65532	5.06981	7.71586	10.3883	-6.24796	-0.384728	-9.71359	-1.60498	5.52418	-9.75598	-8.47008	5.81695	3.51948	-7.9289	-7.99605	2.2975	-8.31972	-2.95534	4.99276	-4.39321	-7.92472	-8.96073	6.92501	-8.69392	-7.49483	2.82426	-4.17143	8.92931	-0.12558	-0.870017	-3.34425	2.94459	-2.45614	3.50718	10.3972	10.1079	-9.92871
431	-9.21074	-2.80788	1.37076	-6.98672	0.908372	-10.22	-6.41173	-5.86632	-4.37927	1.08269	3.45298	-5.11465	5.54015	5.01486	5.09725	10.4012	-6.17372	-1.36671	-9.61058	-1.08689	5.78253	-11.4999	-8.25122	5.90177	3.67597	-8.81835	-7.63076	2.49067	-8.33873	-2.76802	4.79596	-4.39251	-9.09828	-8.86063	-3.75805	-9.1061	-7.4908	3.1123	-4.20174	8.83677	2.59068	-1.37699	-3.30197	2.84932	-2.57446	3.50253	4.30689	10.1026	-9.82501
432	-9.48061	-2.93992	0.26623	-6.64248	1.01072	-10.2727	-6.49436	-6.90915	-4.86774	-0.588358	3.14112	-5.21125	5.55251	4.9784	8.782	10.6054	-6.10768	-1.81825	-9.59664	-1.11962	5.38999	-10.0938	-8.49833	5.89831	3.87225	-6.22838	-7.79554	2.33564	-8.32972	-4.57962	4.64193	4.11037	-9.06373	-8.81539	-3.90042	1.93355	-7.50947	2.55097	-4.22345	9.09064	3.07758	-0.583106	-3.46364	1.71674	4.66226	3.52881	8.93548	10.4434	-0.166709
433	-8.92461	-10.5093	0.302496	-6.71267	1.04428	-10.292	-6.01341	-6.85739	-5.07627	1.28642	3.26069	-5.35937	5.57736	5.04055	7.4683	10.4541	-7.35899	-0.371493	-9.74088	-0.929721	5.42071	-11.7495	-8.23802	5.80592	3.68797	-9.02572	-7.66586	2.36868	-8.31696	-1.13402	4.93238	2.72528	-8.13018	-8.99997	-3.88312	1.96834	-7.47122	2.68678	-4.07177	8.77808	0.0385521	-0.612027	-3.25629	2.36544	4.43233	3.53804	7.41893	10.1019	-0.17179
434	-8.62291	-9.11225	0.430864	0.898946	0.856363	-10.1595	-6.32145	-5.79451	-4.97247	-0.511313	3.54068	-5.01879	4.11064	5.0158	5.61253	10.691	-6.05225	-0.397492	-9.62936	-1.02324	5.72388	-10.149	-8.4819	5.89861	3.87642	-8.87631	-7.48189	2.60308	-8.35117	-0.890967	4.99818	5.10771	-7.70625	-5.84334	-3.89978	2.2236	-7.47372	3.53748	-4.20144	8.94678	-7.84406	-0.591359	-3.37217	1.76089	5.99985	9.63125	10.1444	10.0991	-0.178054
435	-7.76706	-9.79895	1.11932	0.798548	1.08203	-10.2849	-6.16271	-7.42241	-4.1788	0.0966805	2.59937	-5.08337	4.09655	5.05371	8.88131	10.6812	-7.30336	-2.36744	-9.7166	-0.996577	5.83972	-9.57126	-8.48023	5.81272	3.39028	-6.44195	-8.01057	2.39094	-8.29435	-6.50439	4.66078	3.87272	-8.91973	-6.43399	-3.78338	1.69258	-7.4671	2.64481	-4.21536	8.84934	-9.05405	-1.35823	-3.13469	2.59511	6.65494	9.45395	4.52636	10.0978	-0.181369
436	-8.31754	-10.2256	1.02416	1.26389	0.971339	-10.2513	-6.23178	-5.69244	-4.30782	-0.604533	2.6207	-5.1148	4.1396	5.08439	7.2226	10.4576	-10.2303	-1.80855	-9.7202	-1.24049	5.35292	-11.1213	-8.3166	5.85555	3.66636	-8.81705	-7.96156	2.39465	-8.34615	-2.58316	4.77849	2.83037	-9.07272	-5.9131	-3.62005	1.83313	-7.46001	2.5575	-4.16412	9.03656	-8.14544	-0.851217	-3.00493	2.48497	4.91259	9.21585	4.72706	10.103	0.0293606
437	-8.03694	-10.5079	0.961367	0.693465	1.07566	-10.201	-6.18526	-6.83769	-4.77011	0.658895	3.59306	-5.25138	4.14606	5.07078	-6.8448	10.334	-10.2305	-0.648946	-9.54041	-1.16878	5.36615	-11.9302	-8.42488	5.92334	3.66481	-4.33307	-7.83611	2.32442	-8.288	-5.84566	4.89696	5.08298	-9.085	-6.52201	-3.90667	2.24461	-7.45182	3.46534	-4.12375	8.85438	-8.02689	-1.27048	-2.0905	1.85667	5.55849	9.30584	6.71908	10.4179	0.0241364
438	-7.24983	-8.15042	0.629446	1.09477	0.935431	-10.2043	-6.48176	-7.44355	-4.24162	1.51874	3.32006	-5.05574	4.13509	5.04907	-8.21566	10.4916	-10.166	-1.54516	-9.64042	-0.905927	5.68201	-9.64017	-8.44104	5.92934	3.89385	-7.02317	-6.80187	2.61818	-8.35821	-4.12269	4.61148	2.90283	-8.31695	-5.31416	-3.90948	2.27769	-7.4354	3.30987	-4.17978	8.78054	-9.14555	-0.569778	-3.19074	-4.07931	5.76523	9.1978	8.4865	10.6719	0.0128861
439	-7.00763	-9.76326	0.84511	0.735714	1.11638	-10.2703	-6.02791	-6.86915	-4.4251	-0.702128	3.66706	-5.53596	4.09595	4.98353	-6.79168	10.7246	-10.1976	-2.41889	-9.74213	-10.1091	5.5664	-9.65964	-8.5006	5.83812	3.64642	-4.58513	-6.76465	2.64481	-8.30815	-6.293	4.75721	3.655	-8.66078	-4.76605	-3.89304	1.83275	-7.41685	4.40808	-3.95815	8.98943	-8.17287	-1.12295	-2.84057	-4.08571	5.37511	9.28461	4.92616	-7.08122	0.042531
440	-7.47712	-10.3075	0.973974	0.704364	1.05785	-10.2206	-6.16532	-5.53122	-4.41061	-0.090398	3.41019	-5.40323	4.09957	5.02152	-7.91962	10.0999	-10.2193	-0.770853	0.136967	-10.1238	5.64152	-9.76286	-8.51275	5.83319	3.87951	-3.65234	-6.76312	2.52974	-8.35583	-2.34357	4.87994	5.03229	-8.44551	-5.99096	-3.65779	1.17094	-0.96956	2.60331	-4.01395	8.79132	-8.20979	-0.892763	-2.20155	-4.09287	6.45435	9.5763	8.62832	-6.15221	-0.0734717
441	-6.34217	-9.52148	1.0619	-2.64281	1.08912	-10.165	-6.19017	-7.25937	-4.12765	1.44473	2.57601	3.9936	4.12096	5.0071	-8.0199	10.7367	-10.0611	-1.98975	1.06196	-10.1118	5.68876	-10.9767	-8.29347	5.93647	3.79012	-9.42032	-6.79543	2.3049	-8.30137	-0.669704	4.62624	4.90237	-8.85256	-5.39558	-3.90145	2.25465	-0.878515	2.92316	-4.04746	8.90049	-8.09349	-0.9784	-3.27089	-4.051	5.15572	9.40733	6.47557	-6.93258	-0.0687288
442	-6.57997	-10.1141	0.431661	-1.37078	1.19346	-10.2468	-6.36427	-6.94601	-4.50454	0.284017	2.59961	3.56432	4.06383	5.07685	-6.70507	10.3566	-10.2073	-6.94931	0.260261	-10.1289	-4.79768	-10.821	-8.36727	5.93836	3.65538	-5.66112	-6.87518	2.40127	-8.49805	-6.07495	4.73935	2.97156	-8.43213	-5.48119	-3.80508	1.93496	-0.744443	2.57735	-3.90096	9.01022	-8.4025	-0.544357	-2.419	-4.0608	6.23834	9.74403	-1.72608	-6.0054	-0.0578809
443	-9.11602	-8.27214	1.38767	-2.07232	1.03567	-10.2884	-6.07537	-5.34765	-4.44099	-0.802356	3.48879	3.53324	4.13697	5.01815	-8.12677	10.1326	-3.03235	-6.69126	1.01665	-10.1237	-4.86749	-9.54441	-8.50693	5.82808	3.75504	-6.73124	-7.45565	2.21564	-8.2536	-4.36027	4.86459	3.0965	-8.50949	-4.67539	-3.90731	2.23898	-0.585838	2.59686	-4.04607	8.80562	-8.12655	-0.926794	-2.21182	-4.06936	-6.78146	9.55775	-1.65151	-7.14802	-0.0576314
444	-6.78378	-9.44005	1.23909	-1.19763	1.06053	-10.2794	-6.45025	-7.0461	-4.09415	1.00676	2.57428	3.92966	4.11615	5.00152	-6.62449	10.5071	-3.33015	-6.78056	0.378399	-10.1128	-4.75871	-10.9416	-8.52421	5.87511	3.63862	-6.56134	-7.28156	2.25533	-8.55178	-2.09291	-6.18983	4.71817	-8.20347	-6.07291	-3.89578	1.43741	-0.425505	3.25717	-3.97457	8.91431	-8.93032	-0.926311	-2.64811	-4.10054	-7.31469	9.69088	-1.66771	-6.794	-0.0469181
445	-6.0956	-10.5081	1.05702	-2.6116	1.09456	-10.2676	-6.17369	-6.96582	9.06619	1.47152	2.62519	3.53837	4.15528	5.05057	-7.6771	10.7893	-3.22448	-6.11278	1.44707	-10.0494	-4.65214	-10.4018	-8.46693	5.90543	3.64239	-9.13286	-7.13	2.22123	4.41874	-0.481391	-5.92012	3.26482	-8.88203	-4.9658	-3.89166	2.09068	-0.320335	2.60385	-4.11593	8.75064	-8.62711	-0.55686	-2.98236	-3.92106	-5.82065	9.96789	-1.72305	-7.23175	-0.0431923
446	-9.35104	-9.72876	1.24893	-1.5818	1.26583	-10.2282	-6.18671	-6.3944	9.13856	-0.777868	-4.24761	4.05529	4.13621	5.03529	-6.54374	10.7728	-4.59101	-6.623	1.14351	-10.1135	-4.73216	-9.61041	-8.51781	5.86482	3.84417	-8.02485	-6.99599	2.22983	1.18399	-6.90959	3.88242	4.53986	-9.04563	-5.5869	-3.68896	2.09628	-0.308626	4.57247	-3.91138	8.98744	-8.59385	-6.61567	-2.3278	-3.98883	-6.60811	9.91473	-1.7486	-6.79324	-0.0379798
447	-9.23783	-8.44943	1.45094	-2.20792	1.05186	-10.2987	-6.18389	-5.2272	9.17698	-0.278129	-5.92637	3.60346	4.09038	4.9985	-6.4844	10.5252	-2.50524	-6.55172	1.10566	-10.0516	-4.87744	-10.6608	-8.45283	5.90214	3.62897	-9.10447	-6.88581	-6.38972	4.46062	-5.31257	4.00427	3.45119	-7.75267	-6.16321	-3.89565	-3.12494	-0.315888	4.73078	-3.89065	8.8131	-7.80775	-7.15881	-2.4272	-3.98278	-7.50982	9.79267	-0.0417454	-8.08596	-0.0313231
448	-9.40035	-10.4905	1.45903	-2.63868	0.99377	-10.2088	-6.355	-7.13216	9.06957	1.54833	-3.77463	4.03519	4.11004	5.09845	-7.80604	10.3464	-4.52119	-6.02234	1.20522	-10.0432	-4.52382	-10.6686	-8.54205	5.86048	3.75412	-6.82432	-7.74232	-6.39574	1.41105	-3.87141	4.09218	5.14123	-8.23254	-5.67828	-3.90084	-3.75681	-0.445543	2.55149	-3.86498	8.88346	-8.04156	-6.90112	-2.53592	-3.93614	-7.87938	9.53628	-1.04084	-5.75333	-0.0213891
449	-5.86893	-9.28939	0.679293	-2.0026	0.972901	-10.2326	-3.25929	-6.67366	9.02353	-3.33209	-4.94952	4.01964	4.17123	4.98992	-6.49799	10.5458	-3.46739	-7.0184	0.475452	-10.1079	-4.85539	-10.4962	-8.53494	5.90553	3.63197	-8.20857	-7.14801	-6.39044	4.26479	-0.303389	3.82919	4.33765	-8.20294	-5.06585	-3.82647	-3.7017	-0.608726	3.32285	-3.92293	8.76245	-8.80927	-6.09769	-2.99666	-4.00063	-6.66195	9.39277	-0.425403	-6.89511	-0.00809615
450	-6.07833	-10.4908	0.756734	-2.79228	0.891197	-10.1423	-3.19356	-5.09099	9.0527	-3.25986	-5.52462	3.67633	4.17686	5.00272	-7.50729	10.3291	-3.26047	-6.43801	1.18233	-10.0469	-4.51488	-11.5021	-8.46961	5.85538	3.73264	-7.85273	-6.99661	-6.3818	0.675503	-6.70155	3.90613	-0.628862	-8.0187	-5.14844	-3.71048	-5.39496	-0.651516	2.61033	-3.86954	8.99456	-8.79617	-6.68293	-2.65387	-3.99488	-6.38845	9.19179	-0.863823	-7.72615	-0.000728599
451	-5.04249	-9.6915	0.900971	-2.01348	0.964055	-10.1689	-3.27215	-4.90915	9.19299	-4.06845	-6.39403	4.31429	4.06746	5.03499	-6.47914	10.7823	-3.22643	-6.92024	0.514556	-10.0824	-5.18443	-9.54256	-8.47391	5.91065	3.6065	-9.03503	-7.32146	-6.38618	4.3503	-1.86069	3.94195	1.77372	-8.42771	-6.24544	-3.5343	-3.80736	-0.593697	2.77147	-3.95595	8.82301	-7.69165	-6.18475	-2.92375	-3.9265	-7.00661	9.28022	-0.33128	-5.87015	0.0109843
452	-5.43971	-9.84254	0.317499	-1.03891	0.934265	-10.2761	-3.24719	-6.48625	9.17843	-1.75887	-4.71178	3.75437	4.09828	5.08137	-7.59586	10.2295	-3.49539	-7.01103	1.2308	-10.1077	-5.09298	-10.3472	-8.55709	5.85017	3.76387	-6.07996	-7.62892	-6.41529	0.437581	-3.61357	4.03239	-0.667662	-8.80671	-4.58537	-3.90675	-5.67066	-0.442377	3.11883	-3.91737	8.8707	-8.07209	-6.56518	-2.7578	-3.96462	-7.92714	9.17592	-0.237162	-5.78857	-0.161383
453	-6.6997	-7.97755	0.88789	-2.72075	0.918328	-10.2399	-3.11767	-6.32773	9.12262	-3.47389	-5.38192	3.92445	4.05956	5.08818	-7.38796	10.7626	-4.43745	-6.2604	0.565275	-10.1087	-4.97874	-11.2239	-8.29546	7.85618	3.77727	-6.30321	-7.48109	-6.41716	3.37365	-5.59735	3.83477	1.7483	-8.03569	-5.22986	-3.86871	-2.92434	-0.281067	3.18402	-4.00611	-7.76739	-9.00071	-6.92773	-2.86333	-3.97085	-7.53983	9.77255	-1.53434	-7.3831	-0.149491
454	-6.69932	-9.61605	0.768093	-1.07963	0.875756	-10.2631	-3.171	-4.97024	9.08364	-4.10988	-4.04695	3.73464	4.13558	-6.85912	-7.2464	10.5762	-2.63134	-6.81823	0.62956	-10.0825	-4.91183	-9.53448	-8.27466	8.12344	3.62133	-9.21269	-10.0641	-6.41164	2.71013	8.83607	4.02494	0.00617274	-9.0459	-6.3332	-3.56746	-2.69641	-0.626728	2.43501	-4.04979	-6.88091	-8.02803	-5.98907	-2.09222	-3.94151	-7.01456	9.79571	-0.122876	-6.96278	-0.153504
455	-6.64494	-10.5139	0.705667	-2.8645	0.902237	-10.2125	-3.01271	-4.92026	9.0283	-1.89755	-5.17922	3.80189	4.09403	-7.23969	-7.1429	10.3757	-2.41635	-6.2449	0.699775	-10.1127	-4.93478	-10.2333	-8.19454	7.78518	-8.07843	-8.37014	-9.95493	-6.414	3.62329	8.80367	3.89115	1.68553	-7.57582	-5.76502	-3.89532	-4.60696	-0.291878	3.51948	-4.10751	-6.95689	-8.22454	-6.47832	-2.07747	-3.95619	-6.00468	9.75607	-1.23582	-6.94487	-0.152557
456	-5.75728	-9.9985	-3.76113	-2.72001	0.928713	-10.1936	-3.08144	-6.06318	9.24169	-3.40519	-3.89587	4.37461	4.0754	-7.43529	-6.4796	10.7414	-3.39581	-6.24413	1.28848	-10.1111	-4.57392	-6.84606	-8.02567	7.70578	-8.85293	-8.93629	-9.93951	-6.40608	2.87185	8.58242	4.01345	-0.227248	-8.04348	-4.49791	-3.90575	-3.43665	-0.320019	3.2478	-4.09362	-7.27495	-7.63452	-5.88325	-2.16803	-3.95053	-6.4756	9.66236	-1.40264	-5.73897	-0.136531
457	-4.91942	-8.90309	-3.37959	-2.0849	0.854865	-10.1513	-3.22639	-6.69068	9.1167	-4.0364	-6.16006	3.74594	4.11926	-7.10329	-7.04581	10.4263	-4.30368	-6.91166	1.25552	-10.1142	-4.73485	-6.06996	-8.89225	8.02713	-8.84194	-9.20094	-10.0672	-6.40924	2.37463	8.98322	4.05977	1.60514	-7.60375	3.08753	-3.89998	-4.85322	-0.451801	2.42461	-4.01296	-7.78761	-8.02141	-6.94341	-2.09779	-3.97756	-7.86482	9.87441	-0.347201	-7.82775	-0.145019
458	-4.97217	-9.89972	-3.65294	-2.77155	0.821747	-10.2441	-3.27641	-4.93302	9.16725	-3.09005	-4.47064	4.37272	4.0702	-6.36146	-8.61305	10.4968	-3.5183	-6.98154	0.758728	-10.0662	-4.22529	-6.57329	-8.37693	7.79496	-7.94716	-7.65538	-10.0659	-6.39909	3.01008	8.67627	3.96371	-0.632132	-8.92465	3.98962	-3.73198	-3.54344	-0.458233	2.47172	-3.94073	-6.8167	-8.31776	-6.44426	-2.05698	-4.02418	-7.01887	9.95197	-0.661833	-5.72703	-0.134424
459	-5.60469	-8.67914	-3.77948	-2.03627	0.910629	-10.2947	-3.27388	-6.5881	9.26379	-2.92311	-5.6976	3.7889	4.16471	-6.71586	-6.9436	10.6126	-3.51346	-6.63627	1.34637	-10.1114	-5.135	-7.1286	-8.69155	7.54945	-8.8373	-5.65837	-9.92976	-6.40118	2.5581	8.5225	3.85359	-0.25719	-8.10714	3.10873	-3.84883	-1.55658	-0.210832	3.32617	-4.16177	-7.01534	-9.14741	-6.94973	-2.07232	-4.04301	-7.25925	9.95018	-0.562459	-6.94196	-0.127815
460	-5.17718	-10.4022	-3.32628	-2.83284	0.823366	-10.1129	-3.09929	-6.8811	9.14819	-3.9704	-5.27835	4.22414	4.12599	-7.20015	-8.36921	5.70311	-2.30986	-6.33937	0.816661	-10.1053	-4.15604	-6.31168	-8.23492	7.84463	-8.8533	-8.90196	-10.0614	-6.36133	3.16233	9.11073	4.03359	1.48028	-7.88318	3.91239	-3.89949	-3.29853	-0.234828	3.70374	1.05576	-7.3362	-7.68261	-6.51756	-2.07907	-4.03178	-7.72748	9.87864	-0.738864	-7.9152	-0.10971
461	-6.62125	-8.03465	-3.27456	-2.90822	-6.56174	-10.3458	-3.18811	-4.98351	9.2075	-3.01537	-4.44803	3.84143	4.08068	-7.10117	-8.43048	6.41173	-4.11017	-6.11302	1.31818	-10.111	-5.08201	-7.95774	-9.00191	7.81627	-8.82834	-7.73777	-9.92637	-6.42173	2.11307	8.57583	3.82293	-0.405397	-7.93358	3.17987	-3.90054	-7.09127	-0.953704	3.34878	0.902859	-7.67835	-8.02569	-6.97813	-2.9807	-3.88649	-6.73326	9.39137	-0.841625	-6.85005	-0.124476
462	-6.59986	-10.503	-3.49278	-2.10499	-3.96478	-9.67616	-3.18005	-5.26242	9.1685	-4.00289	-6.07852	4.32452	4.0985	-7.29525	-6.81026	6.82287	-3.42461	-6.762	1.37633	-10.1152	-5.10292	-7.41156	-7.96616	7.67453	-8.85323	-9.18997	-9.98367	-6.35906	4.12763	8.69366	3.83499	1.29196	-8.20238	3.80579	-1.64614	-1.39193	-0.315156	2.88563	1.06305	-7.09227	-5.71384	-7.03679	-2.79744	-3.89557	-7.55456	9.25257	-0.00506037	-7.9894	-0.0985673
463	-5.06641	-9.55867	-3.80617	-2.93974	-5.23423	-9.87346	-3.20524	-7.12693	9.27817	-3.18673	-5.82337	3.87375	4.1385	-6.0833	-8.5177	8.36531	-2.24576	-6.90847	-0.383824	-10.124	-4.41028	-7.68335	-7.92622	7.45192	-8.65928	-5.90281	-9.97676	-6.4197	2.27059	9.19094	3.87164	-0.539964	-7.89353	3.13235	-0.890473	-3.63074	-0.239112	2.67131	0.849918	-6.83944	-5.32664	-6.85058	-2.56962	-4.00777	-6.34611	9.55968	-0.166708	-5.74317	-10.0263
464	-6.55882	-2.67931	-3.65001	-1.95968	-4.00272	-6.16413	-3.03982	-5.63278	9.08672	-2.59967	-4.99161	3.85676	4.15265	-6.59144	-6.85836	5.53195	-3.88188	-6.28463	0.877803	-10.1122	-5.02459	-8.49009	-9.00961	7.8439	-8.85573	-8.85056	-9.97677	-6.42353	4.20771	8.52075	4.07586	1.06833	-8.04404	3.91092	-1.00384	-5.11808	-0.807674	3.87037	0.668181	-7.62576	-5.53542	-6.41566	-2.80036	-3.90155	-7.61893	9.74006	-0.624577	-5.81134	-10.0287
465	-5.29551	-5.76357	-3.7243	-2.87747	-5.36423	-5.87083	-3.26874	-5.06634	9.1825	-3.92625	-6.32965	4.09811	-8.1317	-7.26738	-8.27075	7.03533	-2.25317	-6.5897	0.929522	-10.1259	-5.00447	-8.22433	-8.09055	7.43627	-8.61695	-8.52504	-10.0775	-6.42288	1.62544	4.18736	3.88877	-0.665951	-8.13185	2.81978	-1.7061	-1.97295	-0.425657	4.22133	1.04714	-7.72634	-5.78564	-6.81957	-2.84974	-3.91522	-7.75807	7.93116	-0.691408	-6.67636	-10.0243
466	-4.86654	-4.89387	-3.83235	-2.05972	-3.90267	-5.10066	-3.2723	-7.24208	9.25858	-2.47212	-4.71618	3.89797	-8.46443	-7.2964	-6.86526	6.70602	-4.65844	-6.02092	-0.211178	-10.1151	-5.04612	-5.78044	-8.83143	7.58385	-8.52823	-9.18019	-9.97098	-6.35662	3.82269	4.1782	3.91972	0.144862	-8.20227	3.99251	-0.792588	-4.18515	-0.709908	3.0802	0.767108	-7.1503	-5.68024	-6.78968	-2.92687	-4.02203	-5.6402	7.92728	-0.05211	-8.04024	-10.0226
467	-6.48114	-4.61702	-3.76691	-3.01782	-6.46622	-5.5774	-3.0264	-5.20073	9.18079	-3.94642	-5.55584	3.98831	-8.00638	-7.08822	-8.30551	8.3611	-3.65518	-6.4412	1.4325	-10.1121	-4.3005	-5.77121	-8.56954	7.87471	-8.8031	-9.17012	-9.96441	-6.35764	3.99901	4.18215	3.84215	0.211704	-7.75204	3.04003	-0.853977	-6.6801	-0.564397	2.48169	0.919798	-6.81956	-5.40944	-6.38542	-1.60039	-4.01603	-6.22157	7.91423	-1.42073	-6.30357	-10.0266
468	-6.40248	-4.52778	-3.74784	-2.60859	-5.60619	-6.56673	-3.27201	-5.45109	9.24664	-2.80722	1.99603	3.78063	-8.42727	-6.21823	-10.1975	6.04239	-3.24623	-6.41263	0.976647	-10.1057	-5.21034	-5.68493	-8.03515	7.60475	-8.8235	-7.05772	-10.0216	-6.3554	-5.13922	4.17225	4.10548	0.378117	-7.62579	4.03067	-1.73871	-1.75319	-0.841932	4.05215	0.565009	-7.20601	-5.85582	-7.12863	-1.50763	-3.90958	-6.45344	7.92232	-1.56741	-8.08015	-10.0213
469	-6.63993	-3.46197	-3.82319	-1.78433	-4.06599	-5.43956	-3.27357	-5.39833	9.11269	-3.83854	1.71905	3.90905	-8.1502	-6.47769	-9.36594	8.46989	-2.36293	-6.97437	1.40518	-10.083	-5.22629	-5.74158	-9.00983	7.79802	-8.2109	-8.77461	-9.88935	-6.35764	-4.31132	4.19774	3.91827	0.373426	-7.98244	2.92767	-1.31591	-4.38491	-0.948151	-1.86404	0.996122	-7.67463	-5.16978	-6.35344	-2.2013	-1.80152	-6.85486	7.90119	-1.02806	-6.47431	-10.0305
470	-4.90952	-5.05689	-2.83177	-2.39895	-6.31357	-6.3562	-3.27311	-7.25747	9.28126	-2.70513	1.53377	3.92303	-8.02352	-6.99269	-9.73503	6.73008	-3.30025	-6.81728	-0.026446	2.24392	-4.13177	-5.76454	-8.00734	7.59625	-8.75492	-8.66602	-10.0285	-6.37985	-4.23552	4.19273	3.88995	0.605123	-7.76076	4.03012	-1.23395	-6.89928	-0.989268	-2.50314	0.861062	-7.75619	-5.37615	-7.15566	-2.36704	-1.50204	-7.51107	7.88583	-1.23223	-3.33869	-10.0236
471	-6.18673	-2.45251	-3.72417	-3.0448	-3.82328	-5.56892	-3.21357	-5.79195	9.15168	-3.89404	1.95497	3.66666	-8.0175	-7.17833	-9.70864	8.28974	-4.77186	-5.98977	-8.05963	2.20762	-5.25365	-5.70118	-8.08778	7.95065	-8.34423	-7.51324	-9.88427	-6.37764	-4.60021	4.18827	3.84468	-0.100236	-7.90197	3.53235	-0.625954	-3.8914	-6.57167	-1.6176	0.499928	-6.84403	-5.88239	-7.0755	-1.98666	-2.66921	-7.66715	7.87411	-0.795805	-3.26373	-10.0253
472	-4.98344	-5.97235	-2.80936	-9.1943	-6.63274	-6.04583	-3.19594	-6.0957	9.28857	-2.2168	1.60942	-1.99294	-8.17027	-7.13602	-9.52518	5.88783	-3.45428	-6.43178	-2.4478	2.17611	-4.87235	-5.70756	-8.97273	7.4889	-8.82728	-9.15681	-9.99776	-6.37279	-5.31685	4.2706	4.09776	0.0537381	-8.08978	3.33151	-0.726562	-5.94589	-8.83655	-2.32219	0.906162	-7.55	-5.51191	-6.75383	-1.76064	-2.50719	-7.63363	7.86826	-2.17969	-3.14951	-10.0329
473	-6.60356	-4.34999	-3.69599	-8.9012	-4.13842	-6.68357	-3.27378	-5.58606	9.19586	-3.68905	2.03187	-2.84558	-8.39488	-7.16305	-9.67367	7.24697	-2.81977	-3.34461	-6.18058	2.43547	-4.39317	-5.88639	-8.03329	7.65846	-8.79795	-7.2904	-10.0083	-6.37638	-4.50875	4.1681	3.9643	0.832709	-7.77408	2.82438	-1.3514	-2.455	-6.35184	-2.56753	0.828648	-6.85339	-4.97242	-6.31895	-2.50161	-2.35849	7.85182	7.71959	-2.02069	-3.33067	-10.0205
474	-6.31278	-2.41081	-3.73061	-8.80863	-5.50079	-5.5908	-3.05806	-7.22869	9.10333	-2.0101	1.62908	-3.53028	-7.99527	4.79302	-9.60517	6.67081	-10.2824	-3.87042	-4.43776	2.3788	-4.55999	-5.77288	-9.0102	7.64562	-8.8227	-5.77626	-10.0165	-6.36607	-5.23841	4.26013	3.85618	-0.557574	-8.01614	2.96071	-1.44474	-6.21004	-9.07151	-2.47245	0.926159	-7.70956	-5.12355	-7.15724	-3.08859	-3.39954	7.72824	7.72902	-2.42855	-5.14477	-10.0303
475	-6.66309	-3.18704	-3.58825	-9.12246	-4.43243	-5.09248	-3.14452	-7.18861	9.2347	-3.76828	1.58889	-2.42868	-8.07274	5.11089	-9.2575	8.48579	-10.2821	-3.08875	-7.82866	2.32315	-4.43565	-5.47148	-9.01182	7.65832	-8.84413	-6.79871	-10.0452	-6.37195	-4.40549	4.25603	3.96401	0.322712	-7.71781	3.66054	-0.559421	-2.20844	-5.52751	-1.59618	0.517874	-7.61964	-5.88786	-6.72874	-3.17587	-2.91514	7.63677	7.97606	-2.29436	-3.61023	-10.0298
476	-4.88506	-5.57484	-3.79725	-8.83491	-6.60107	-5.21182	-3.27247	-5.93434	-4.29018	-2.33866	1.65272	-1.93092	-8.36546	5.32084	-9.79175	8.13761	-10.2316	-3.01207	-4.67892	2.2797	-4.43085	-5.51192	-8.2058	7.70522	-8.75354	-3.03942	-9.92422	-6.36723	-4.72777	4.16143	4.06513	-0.448788	-7.95054	3.26893	-1.55512	-6.45384	-8.63089	-2.61497	0.74301	-6.986	-5.40452	-6.25724	-3.18419	-2.22158	7.67251	7.95516	-2.12036	-3.36933	-10.0209
477	-6.05614	-2.30764	-2.90467	-8.7975	-5.72836	-6.52148	-3.15988	-5.72303	-4.3308	-3.5389	2.05782	-2.9053	-8.09909	4.66316	-9.85844	6.5835	-10.2806	-3.90716	-2.72952	2.04209	-4.39756	-5.49412	-9.00875	7.77893	-8.80646	-6.02217	-10.0498	-6.36243	-4.68068	4.15753	-8.97826	0.189039	-8.22772	2.77487	-1.1212	-4.019	-8.72678	-1.89061	0.500879	-7.78229	-5.21085	-7.86986	-2.35999	-4.01056	7.63646	7.94755	-1.39776	-3.4421	-10.028
478	-4.86722	-4.78286	-3.53445	-8.62016	-4.22898	-6.75366	-3.27326	-6.28242	-4.43451	-2.11719	2.1064	-1.87701	-8.33332	4.81526	-9.01452	7.76966	-10.2036	-3.15659	-3.02549	2.03022	-4.44418	-5.54312	-8.17658	7.96496	-8.84988	-3.90865	-9.92389	3.55034	-4.76166	4.26558	-6.24929	0.33595	-7.19181	2.78341	-0.540285	2.40205	-5.59161	-1.63943	0.533412	-6.87358	-5.09878	-4.70212	-2.35345	-4.60742	7.78316	7.76131	-1.59246	-3.89628	-10.0271
479	-5.91767	-6.33271	-2.9633	-9.39892	-4.65011	-5.61275	-3.20259	-7.10525	-4.26456	-3.60785	2.04566	-3.61601	-8.11471	5.16129	-9.92614	8.4403	-10.2293	-2.86317	-8.51157	2.01896	-4.40316	-5.57462	-9.00807	7.54535	-8.80847	-4.50564	-10.0553	2.99116	-4.7588	4.15566	-10.5462	-0.282135	-8.20758	3.79749	-1.56053	2.44346	-8.40838	-2.15367	0.541829	-7.46646	-5.87274	-4.54495	-2.83138	-4.71022	7.68849	7.77095	-1.91464	-3.15834	-10.0187
480	-4.83843	-5.29277	-3.01731	-8.46706	-5.81254	-5.59108	7.69506	-5.8654	-4.34775	-7.4432	1.68867	-2.37311	-7.9976	5.36695	-10.1219	6.51769	-10.2737	-3.03531	-6.72794	1.99151	-4.5353	-5.61462	-9.00369	7.56463	-8.84509	-5.51512	-9.91206	2.93835	-4.83812	4.26406	-4.56694	-0.0742874	-8.03259	3.67976	-1.04745	2.41373	-5.94866	-1.9072	0.590409	-6.9302	-5.2334	-4.6189	-2.7017	-4.05025	7.7133	7.78718	-1.19593	-3.47623	-10.0184
481	-6.69796	-2.93066	-3.82988	-9.41059	-6.84766	-6.77651	7.5124	9.18544	-4.45948	-7.48626	1.56665	-2.10772	-8.24209	4.83374	-8.9323	7.94533	-10.2824	-3.33495	-3.306	2.15296	-4.57008	-5.64467	-8.19412	7.75881	-8.82345	-7.66397	-9.90599	3.3377	-5.2856	4.23759	-10.2572	7.47113	-7.07107	3.54957	-0.528824	2.3944	-8.52715	-1.66714	0.642989	-7.77277	-5.16262	-4.41948	-3.13965	-4.55922	7.72958	7.77177	-2.17606	-5.41886	-10.028
482	-5.06179	-4.67243	-3.49192	-8.34152	-4.85343	-6.2325	7.68513	9.26513	-4.58862	-7.06845	1.50512	-2.99028	-8.05877	4.70048	-9.71223	6.15918	-10.2825	-3.7616	-4.89075	2.10051	-4.3786	-5.69031	4.11973	7.83153	-8.86265	-5.85521	-10.0337	3.00084	-4.68755	4.24034	-5.43551	7.86151	-8.1649	3.24438	-1.18148	2.48278	-5.71885	-1.60764	0.673773	-6.90692	-5.35807	-4.48582	-2.97996	-4.05807	7.60033	7.78494	-1.86688	-6.55939	-10.0129
483	-5.09539	-4.15748	-3.82901	-9.41288	-6.0145	-5.77421	7.6697	6.80246	-4.47452	-7.29017	1.87215	-2.535	-8.67683	5.05241	-10.3989	8.48682	-10.2781	-2.88888	-6.45745	2.12882	-4.58357	-5.72445	0.47121	8.08918	-8.80575	-4.0631	-9.89686	3.15604	-4.98896	4.23071	-8.20741	8.00145	-7.12081	2.88797	-0.524239	2.52673	-8.25191	-2.46724	0.679234	-7.39327	-5.06721	-5.16578	-2.52861	-4.3849	7.7576	7.73579	-2.03948	-3.26545	-10.0291
484	-5.03225	-4.70308	-3.43874	-8.16718	-6.71336	-5.21047	7.50708	9.02546	-4.57714	-7.44684	2.01239	-3.69215	-8.04208	5.40868	-10.0057	6.26965	-10.2596	-3.35917	-8.26993	2.06398	-4.42548	-5.75475	5.50907	-0.256302	-8.79849	-3.23799	-10.0376	3.21498	-5.34311	4.2331	-7.39581	7.72124	-6.9988	3.32765	-1.45894	2.41005	-5.51765	-2.38445	0.764797	7.31801	-5.2368	-5.01958	-2.84437	-4.77414	7.64528	7.74442	-1.74471	-3.43854	-10.0301
485	-5.09745	-2.57333	-3.73941	-9.37617	-6.15884	-5.13043	7.58354	8.15506	-4.40483	-7.28124	2.19745	-2.05019	-8.62697	4.8584	-9.83063	7.61492	-10.2279	-3.51852	-5.10951	2.75018	-4.57638	-8.75489	3.84719	-0.198001	-8.86181	-6.62988	3.80275	3.34633	-4.74256	4.24938	-8.7705	7.88919	-7.90507	3.42655	-1.73813	2.39223	-8.95698	-1.68846	0.878101	7.25693	-5.28276	-5.34983	-2.75203	-4.19329	7.68573	7.74991	-1.95373	-5.70118	-10.0155
486	-5.10772	-2.41135	-2.77677	-9.28069	-6.86731	-5.31535	7.54867	9.24693	-4.34767	-7.35234	1.50626	-3.07892	-8.08328	5.19371	-9.99258	6.52464	-10.2825	-3.17976	-2.0286	2.79101	-4.3843	-9.03093	1.10591	0.00295031	-2.55751	-5.34348	3.40584	3.55049	-5.11119	4.25201	-6.46371	7.84544	-7.03615	3.42899	-0.576357	2.39988	-5.36338	-2.54183	0.589115	6.69991	-5.81247	-4.90323	-2.76482	-4.58754	7.84584	7.75706	-0.497457	-3.28764	-10.0309
487	-5.0589	-3.969	-6.84838	-7.94875	-4.97937	-6.73488	7.56279	7.93186	-4.47749	-7.48722	1.53009	-2.48639	-8.26972	4.68438	-11.1117	8.3933	-10.2769	-3.03441	-7.24988	1.81695	-4.42504	-10.3519	5.50314	-0.299864	-3.63846	-7.36437	3.26237	3.48015	-4.50987	4.24328	-10.8225	7.82644	-6.90991	3.03622	-0.813285	2.48958	-7.94463	-1.82887	0.964817	6.65768	-5.50247	-4.79132	-3.13224	-4.82762	7.81969	7.83508	-2.06988	-3.39697	-10.0138
488	-5.03755	-5.41589	-4.79046	-9.36182	-5.88964	-5.96898	7.5364	8.81489	-4.42445	-7.76182	2.28363	-3.73891	-8.29894	5.42992	-8.96233	6.63076	-10.2777	-2.93705	-6.98139	2.72003	-4.55393	-12.8004	0.664778	-0.200461	-0.945455	-4.6496	3.31546	3.3969	-4.60956	4.20533	-4.80683	7.77542	-7.52587	7.89114	-0.922086	2.39731	-5.3478	-2.39613	0.541527	7.27497	-4.93221	-5.57149	-3.18315	-4.88236	7.5939	7.84098	-2.29801	-3.52681	-10.0154
489	-5.042	-3.73108	-7.2776	-7.82675	-6.79039	-5.64328	7.69336	7.04046	-4.306	-8.01106	1.7473	-2.14996	-8.58252	4.87394	-9.66503	6.58426	-10.2826	-3.79075	-5.35254	1.87254	-4.41668	-10.7749	4.6651	0.0164182	-2.83001	-7.1873	3.73891	3.24055	-5.21501	4.21184	-9.97135	7.62883	-6.96234	8.19668	-1.63776	2.43809	-8.0964	-1.97898	1.02453	7.1378	-5.16504	-2.96708	-2.9407	-4.89743	7.73365	7.85172	-0.74932	-4.15753	-10.0302
490	-5.05046	-2.4896	-6.85771	-9.35313	-5.1118	-5.59479	7.49537	9.2027	-4.59329	-7.3261	1.71476	-3.25491	-8.03245	4.93375	-10.6484	7.4456	-10.179	-3.68719	-3.57838	2.77361	-4.46686	-12.4678	4.39338	-0.210727	-5.91129	-5.06199	3.63891	3.60456	-4.67528	4.20265	-5.64085	7.74152	-7.74402	8.3168	-0.708168	2.5362	-5.44339	-1.71865	0.519188	6.77389	-5.42852	-3.09738	-3.05512	-3.71996	7.96976	7.84632	-0.982425	-3.1835	-10.0192
491	-5.09399	-6.19885	-7.41073	-7.78227	4.64892	-5.73605	7.51442	6.57914	-4.61561	-7.50198	1.96325	-3.78465	-8.54466	5.22864	-9.89214	-1.52821	-10.2644	-3.87294	-8.79763	1.90915	-4.4118	-12.6444	0.884458	0.0213675	-0.671819	-6.34765	3.66346	3.82205	-4.26673	4.21169	-8.01974	7.0446	-7.03515	7.75622	-0.635372	2.49264	-7.55187	-2.39206	-5.79793	6.71778	-5.52434	-5.79531	-11.0581	-3.89233	7.59937	7.85505	-2.1489	-3.279	-10.0315
492	-5.00464	-2.20589	-4.57131	-7.80885	5.29603	-6.64845	7.65825	7.70818	-4.41479	-8.35129	1.83479	-2.58253	-8.19	4.71419	-9.03991	-1.02349	-10.281	-2.92429	-9.37467	1.94269	-4.55781	-10.1854	5.53155	-0.31896	-4.19007	-3.4289	3.52176	3.76776	-5.39219	4.22009	-7.15741	7.8162	-8.04715	8.01288	-1.70071	2.45262	-5.50716	-1.75739	-5.58343	6.8974	-5.62116	-6.52078	-10.88	-4.47542	7.68962	7.80547	-1.93396	-3.42783	-10.0303
493	-5.0882	-5.1789	-7.57478	-8.11063	4.52657	-5.13242	7.68159	8.45156	-4.64959	-8.0944	1.9024	-3.17075	-8.50333	5.44375	-9.67299	-1.2176	-10.2834	-3.22678	-5.62551	1.97093	-4.36276	-12.3317	3.30724	-0.212781	-2.2956	-5.68987	3.54844	3.37136	-5.36832	4.22762	-8.57506	7.54592	-6.83676	8.08875	-8.94646	2.54492	-7.76669	-1.6046	-5.747	7.32989	4.118	-6.02719	-10.2476	-3.56815	7.73289	7.79874	-0.221971	-5.99627	-10.0185
494	-5.07065	-4.69899	-6.81895	-9.32645	6.78897	-6.41074	7.56383	7.53463	-4.28902	-8.22784	1.79587	-2.19394	-8.04925	5.24825	-10.8998	-1.59746	-10.2836	-3.38051	-2.08295	2.53494	-4.41928	-10.2356	5.55312	-0.331371	-6.80308	-3.61226	3.44216	3.75619	-4.37098	4.21772	-4.04597	7.85698	-7.29417	7.7859	-9.10054	2.47018	-7.06231	-1.83519	-5.18405	7.13143	4.78497	-2.92676	-11.0576	-3.58466	7.92005	7.81344	0.0546657	-4.8925	-2.08428
495	-4.97153	-5.62485	-6.9643	-9.33822	4.84344	-6.78116	7.60556	8.98656	-4.35063	-8.29109	1.91066	-3.84469	-8.21355	4.88542	-9.96987	-1.38251	-9.99974	-3.81594	-3.85342	2.56685	-4.45701	-10.535	3.0478	0.021208	-4.47204	-6.48555	3.55762	3.59425	-5.37839	4.22604	-5.02612	7.00273	-8.15003	8.35069	-9.00495	2.431	-5.53384	-2.57726	-5.65282	6.65494	2.96597	-6.27915	-10.3848	-4.41553	7.61722	7.82149	-1.99459	-3.20698	4.60662
496	-5.03658	-4.99963	-6.8385	-7.94218	5.72771	-6.70852	7.69919	7.42181	-4.71477	-7.82016	1.64201	-2.65004	7.77467	5.47391	-9.16737	-1.45773	-10.0135	-2.89489	-9.0698	2.48566	-4.3743	-10.2034	5.5204	-0.336918	-6.50972	-4.21184	3.2703	3.15148	-4.19993	-0.429305	-9.69859	7.71661	-6.74983	8.32724	-9.32402	2.39695	-5.53877	-1.69687	-5.58385	7.15648	3.90013	-4.30885	-11.0597	-4.27298	7.94492	-2.10013	-2.71731	-4.41036	0.833141
497	-4.96137	-5.4763	-7.07789	-9.39294	4.50421	-5.78628	7.55978	8.25222	-4.48675	-6.42995	1.8209	-2.31039	8.3476	4.74593	-0.137254	-1.08935	-10.0297	-3.41857	-7.54117	2.46993	-4.40748	-12.275	3.57553	0.0339156	-2.02621	-4.80149	3.66672	0.988234	-5.39723	-0.343183	-7.82479	7.75162	-6.48434	7.7904	-9.49169	2.46345	-6.80998	-1.62115	-5.41085	7.22545	4.69656	-6.71149	-11.0136	-4.4495	7.94001	-2.06118	0.610975	-3.30404	-1.80752
498	-5.08108	-5.54053	-7.08626	-9.15607	6.70382	-6.87078	7.60148	9.10237	-4.60791	-6.24008	1.5638	-3.34624	8.64328	4.88611	-0.0279194	-1.56441	-9.99976	-3.39991	-2.23047	2.68697	-4.49125	-12.2736	5.52684	-0.220965	-5.03824	-4.9373	3.75643	0.48945	-4.21046	-0.411035	-6.04243	7.22533	-7.77724	8.13739	-9.50558	2.40829	-5.53594	-1.79972	-5.17021	7.02606	3.11185	-4.14458	-11.0336	-4.29501	7.72376	-2.22605	-2.59391	-3.2362	1.09317
499	-5.08249	-5.37863	-6.91639	-9.22278	5.08917	-6.84672	7.64688	8.03483	-4.56074	-7.90151	-8.20717	-2.78317	7.67738	4.77562	0.0485931	-1.25546	-10.0018	-3.51497	-4.14963	2.61284	-4.36033	-10.1796	2.53917	-0.139837	-4.7507	-7.00105	3.52588	0.946719	-7.63163	-0.202667	-6.92143	7.7157	-6.69283	7.71509	-9.50253	2.40446	-7.30271	-2.26027	-5.50577	7.11147	5.06737	-6.89254	-11.0668	-4.15588	7.66382	-2.1021	0.365323	-3.43167	-0.966928
500	-5.15179	-5.53698	-7.53468	-9.15844	6.72582	-5.82256	7.48578	7.39257	-4.3817	-6.51536	-8.43474	-3.4349	9.17634	5.46104	-0.0294423	-1.22978	-10.0277	-3.88079	-5.90341	2.65363	-4.47707	-12.3146	5.74312	-0.0392121	-3.91432	-2.89397	3.35709	0.459029	-8.14279	0.0184261	-8.39001	7.87587	-6.76333	7.74017	-9.50864	2.447	-5.51369	-2.07769	-5.17862	6.63684	4.29974	-3.94922	-10.9781	-4.08264	7.96878	-2.35321	-2.71201	-6.28023	4.37188
501	-5.07658	-5.43038	-6.2653	-9.24855	5.51385	-6.87541	7.50302	7.79066	-4.52021	-6.32122	-8.52719	-2.24981	7.52168	4.7307	-0.514888	-1.51742	-10.0081	-3.67328	-8.23461	-7.22759	-4.41596	-12.3903	2.7914	-0.340913	-1.75764	-6.19414	3.45125	1.04961	-7.60806	-0.15354	-4.31192	7.74561	-7.91249	8.24295	-9.49086	2.41909	8.35269	-1.87351	-5.32701	6.85709	3.24132	-7.1408	-11.0139	1.54136	7.90608	-2.44851	-2.62348	-7.8976	-2.3517
502	-4.9832	-5.22733	-6.56526	-9.26208	5.91375	-6.97245	7.64323	8.86166	-4.38975	-6.42769	-7.29417	-2.71309	8.64813	5.23541	0.0172717	-1.04584	-10.0454	-3.27704	-8.49854	-7.87207	-4.51405	-10.2284	2.04164	-0.226552	-5.31585	-5.18781	3.33533	0.764936	-7.98104	-0.306776	-9.44101	7.11985	-6.63779	7.68312	-9.50292	2.50157	8.41333	-1.74646	-5.25066	7.08328	4.90524	-7.40501	-11.0522	1.71291	7.56781	-2.49568	-2.48173	-5.84999	1.3403
503	-4.98236	-5.57078	-7.38578	8.80683	5.31682	-6.76515	7.62052	8.56146	-4.38688	-6.64777	-8.3403	-6.07547	8.34939	4.99243	-0.151801	-1.45845	-9.99233	-3.60193	-2.87229	-7.90282	-4.55262	-12.5859	5.58996	0.0599576	-3.09385	-7.51514	3.2831	0.426259	-7.74895	-0.387779	-7.61639	7.79698	-6.58909	7.98561	-9.49021	2.42811	8.43779	-2.4766	-5.8358	7.03706	4.20922	-3.73407	-10.569	1.85304	7.6979	-2.48755	-6.95699	-5.65391	4.12838
504	-5.14814	-5.32748	-7.07264	8.79829	4.52101	-6.96032	7.67265	7.44235	-4.55295	-6.41816	-8.3273	-5.5885	8.19846	5.26867	0.0755359	-1.50228	-10.0455	-5.84221	-2.85482	-7.40483	-2.37265	-10.2347	5.65425	-0.0812612	-5.60795	-3.76871	3.29474	0.798605	-8.21519	1.57374	-9.20337	7.80872	-7.51433	8.30958	-9.49809	2.3949	8.27422	-1.67052	-5.10358	6.7268	3.37368	-3.49933	-10.2989	1.86171	0.950034	-2.47589	-7.21141	-5.41992	-2.58322
505	-5.09959	-5.11777	-7.16091	8.9801	6.72958	-5.89239	7.67771	7.54409	-4.56438	-6.98569	-8.24652	-5.93408	7.53746	-1.98606	-0.703973	-0.919586	-9.99197	-6.35624	-1.72234	-7.59482	-2.11982	-10.2472	2.28866	-0.0348139	-1.4896	-4.36005	3.73419	1.02965	-7.67908	-0.017847	-5.23297	7.83707	-7.64977	8.25475	-9.50745	2.51225	8.24389	-1.51423	-5.83023	7.11529	5.37027	-7.64984	-10.7672	1.69624	1.57434	-2.18846	-6.71969	-8.12225	-1.51585
506	-5.12325	-5.5236	-7.23606	9.13138	5.5031	-7.07176	7.53928	8.72216	-4.67021	-6.88483	-7.43545	-5.18335	8.43519	-1.78676	0.0808358	-1.3948	-10.0458	-6.06693	-1.81845	-7.87765	-2.07587	-12.7981	5.18956	-0.341621	-6.20543	-8.48794	3.37346	0.38668	-8.21451	1.76281	-5.83719	7.32632	-7.28336	7.68072	-9.49635	2.47726	0.86307	-2.51556	-5.1831	6.91067	2.2915	-3.27674	-10.9423	1.80209	2.26521	-2.12156	-6.49327	-5.17745	-2.78225
507	-5.03066	-5.58581	-7.21087	9.01874	6.07129	-6.09613	7.69668	8.37375	7.50312	-6.67243	-8.54257	-6.06097	7.60978	-1.47872	-0.318317	-0.909306	-10.0527	-6.76345	-2.04066	-7.75594	-2.03003	-12.8435	1.5618	-0.2312	-3.36083	-7.8124	3.75964	0.743196	-8.14046	0.211535	-6.68726	7.90679	-7.39298	7.8729	-9.49536	2.38803	0.684032	-1.41203	-5.14519	7.12854	5.66356	-9.93705	-11.0528	1.58928	1.9067	-2.2946	1.20301	-6.0572	-1.22706
508	-5.07737	-5.38961	-5.94922	8.86817	6.81489	-7.06341	7.65675	7.51604	9.14163	-6.84862	-8.53829	-5.06731	8.59696	-1.50949	0.042759	-1.16167	-9.99705	-6.83676	-2.87913	-7.90299	-2.3261	-12.8034	1.79773	-0.0232164	-8.72347	-9.18458	3.44682	0.363295	-8.18987	0.452438	8.15799	7.76611	-6.49439	8.1436	-8.69799	2.55245	1.08263	-2.14488	-5.0732	7.22614	4.43555	-9.58307	-10.4043	1.81709	2.06134	-2.23979	0.230456	-2.76271	1.60259
509	-5.0273	-5.56531	-7.75466	8.8719	4.52611	-6.67338	7.52741	7.56285	9.6857	-6.84886	-7.04787	-5.87221	9.00526	-1.89577	-0.373949	-1.42882	-9.99281	-6.17315	-1.92298	3.92795	-2.37258	-10.1518	4.92769	-0.172792	-8.87661	-8.1303	3.7253	0.306344	-7.97404	1.61038	8.17597	7.79791	-6.62561	7.7196	-9.48999	2.16017	1.60471	-2.29987	-5.16368	6.78032	3.50079	-9.9352	-11.0906	1.751	0.754408	-2.17127	-0.0946876	-8.79739	1.84389
510	-5.05876	-5.30302	-5.63883	8.96577	6.75248	-7.17841	7.58968	7.29761	9.85673	-6.68243	-8.68988	-5.62669	7.67902	-1.66935	-0.884437	-0.975426	-10.0322	-6.8484	-2.02338	3.93075	-2.1379	-12.4182	5.6854	-0.33808	-8.88859	-8.79734	3.36039	0.801588	-8.05783	0.676207	8.17572	7.39944	-6.79207	7.73445	-9.50513	2.91234	0.972365	-1.90649	-5.14061	6.84653	2.48302	-9.93425	-11.0945	1.86748	2.40042	-1.94375	-0.229692	-4.94191	4.83594
511	-4.98793	-5.32488	-5.33204	-10.1552	4.59261	-6.62339	-8.67332	-7.81065	6.39604	-7.79873	-8.18877	-6.03531	8.79237	-0.957369	-0.0489028	-1.43272	-10.0022	-6.22076	-2.85192	3.90329	-2.3985	-12.6308	1.33079	-0.239232	-8.88151	-9.03691	3.57176	0.705477	-7.87552	1.66663	8.16578	7.9297	0.497575	8.01364	-9.50555	2.13677	1.13072	-2.35207	-5.1009	7.25156	5.22926	-9.93805	-11.0538	1.80795	1.72062	-2.02933	1.14575	-8.37047	2.13104
512	-5.11408	-4.71541	-7.81218	-9.9457	6.37105	-5.97806	-8.94334	-5.78035	9.36671	-8.43136	-7.17092	-5.71382	7.97696	-1.73026	-0.848325	-0.948083	-9.99213	-6.11294	-2.87393	3.91472	-2.39293	-10.1938	5.44324	-0.274724	-8.89749	-9.22932	3.33922	0.922031	-7.99492	1.90196	8.08967	0.421005	1.09434	8.31824	-9.50433	2.7204	1.4843	-1.37134	-5.16527	7.00381	5.6925	-9.93462	-11.0888	1.73193	0.495096	-2.17798	0.40804	-6.25278	-0.728168
513	-1.62068	-5.6012	-6.82337	-10.1811	4.54948	-7.24417	-9.15851	-6.95678	9.83888	-8.02664	-6.93435	-6.05307	7.49749	-1.58113	-0.885286	-1.38355	-9.85926	-6.02151	-2.74111	3.92739	-2.14009	-11.6106	-5.59228	-0.186769	-8.76816	-6.90736	3.67932	0.657078	-7.69581	1.97853	8.18125	1.19452	-2.87114	8.2296	-9.5068	3.10032	0.918815	-1.5644	-5.20599	6.97022	4.36994	-9.92775	-11.0937	1.18654	0.612583	-2.12637	1.09219	-8.59831	-0.316672
514	-2.09278	-5.51487	-6.97062	-9.50758	4.73932	-7.26866	-9.92989	-5.96893	9.65616	-7.6964	-8.17221	-5.40653	8.51477	-1.35026	-0.868344	-1.06851	-9.99067	-5.96177	-2.12842	3.915	-2.1042	-12.1661	-5.17977	-0.013483	-8.6759	-9.18264	3.43042	0.649388	-7.91748	1.65364	8.13464	1.00755	-0.579067	8.28047	-9.49289	3.09753	0.92011	-1.43023	-5.54071	6.70559	3.6347	-9.93325	-10.9404	1.5695	2.10346	-2.16316	0.576344	-4.22549	2.42329
515	-2.22662	-5.58486	-7.65327	-10.2179	6.71873	-6.62528	-8.85288	-7.79405	7.71538	-8.30358	-8.48936	-6.01236	8.40289	-1.71279	-0.870106	-1.63419	-9.95742	-6.87001	-2.80475	3.90327	-2.06465	-11.8936	-6.96387	-1.77674	-8.87171	-7.5737	-0.258598	0.930394	-7.77936	1.78855	8.24404	0.266792	1.06221	7.8858	-9.50311	2.98353	1.64352	-2.07632	-5.30759	-0.0510338	2.65625	-9.92377	-10.6639	1.26678	2.23464	-2.06545	-0.138103	-6.43892	2.7157
516	-1.94839	-5.28782	-6.88467	-10.7072	6.45805	-6.2304	-8.68104	-5.69934	6.27481	-7.86056	-6.83531	-5.80821	8.59403	-1.48149	-0.838803	-1.6429	-9.72063	-5.93186	-2.24031	3.92902	-2.03616	-11.0403	-5.14826	-0.689553	-8.70926	-6.80143	-0.261214	0.638727	-8.07239	1.94788	8.08976	0.809085	0.435238	7.79043	-9.50282	2.15966	0.984953	-1.44932	-5.38982	0.217369	5.47545	-9.9334	-11.0638	1.88079	0.39758	-2.0081	-0.0633083	-4.71025	-0.513819
517	-1.56394	-4.86918	-5.04362	-10.3726	4.95707	-7.15645	-8.56241	-6.56192	9.70257	-8.25657	-8.16458	-5.98014	7.61424	-1.89299	-0.589327	-1.37705	-9.99873	-5.89997	-2.34557	3.90547	-2.10592	-11.3229	-7.18361	-2.92315	-8.854	-8.57153	-0.26313	0.864616	-7.84607	1.86521	8.14464	0.0664873	-0.278914	7.80804	-9.13086	2.25454	1.38927	-1.29487	-5.39715	0.0776078	5.57555	-9.9345	-11.0894	1.76926	2.07986	-1.96148	-0.128302	-6.62733	-0.134264
518	-1.50137	-5.54347	-2.99725	-10.3661	6.23904	-6.65023	-9.09027	-7.14724	8.39871	-8.50262	-7.98929	-5.29939	8.55221	-0.757859	-0.193038	-1.4663	-9.58496	-6.80495	-2.66524	3.9207	-2.23054	-7.92373	-5.73834	-2.28157	-8.86116	-8.5214	-0.258366	0.906623	-7.57202	2.018	8.06616	0.597437	0.00236792	8.1101	-9.49221	2.99102	0.678328	-1.47167	-5.46499	0.360499	4.60273	-9.89148	-11.0782	1.82897	2.5926	-1.92041	1.27937	-8.96716	0.30046
519	-1.41562	-5.49845	-3.46199	-10.6716	6.57644	-6.38566	-8.85583	-5.81176	9.86137	-8.34648	-8.51471	-5.89601	8.4214	-1.88543	-0.0740655	-1.22574	-9.99169	-6.28664	-2.44959	3.90621	-2.17148	-8.0775	-5.37973	-1.81356	-8.89489	-7.85245	-0.25572	0.650273	-7.86914	1.99616	8.18523	0.381947	-2.57908	-7.2292	-9.49266	3.46533	1.86944	-2.09105	-5.26819	-0.270418	3.77115	-9.86278	-11.0901	1.66179	1.50832	-2.10139	0.0485097	-6.85203	3.28469
520	-1.33154	-5.33531	-2.88392	-10.7048	6.63909	-5.83233	-9.73674	-7.83747	8.88503	-7.11123	-8.59452	-5.66895	7.7054	-1.80024	0.0467817	-1.56204	-9.48333	-6.69244	-2.47959	3.91958	-2.01665	-7.97734	-5.1147	0.175514	-8.66784	-9.20951	-0.261286	0.529178	-7.62039	0.690786	8.17072	0.154885	0.410654	-7.28413	-9.50575	3.37956	1.85009	-1.49299	-5.19987	-0.163304	2.81482	-9.89948	-11.0783	1.6121	0.2791	-2.19589	1.38939	-3.98128	3.00792
521	-1.28271	-4.77939	-2.82447	-9.36951	5.13452	-7.26139	-9.54745	-7.87161	7.11359	-8.23907	-8.07056	-6.10433	3.08329	-1.51563	-0.74425	-1.45391	-9.38849	-5.82426	-2.55122	3.9069	-2.27575	-3.14252	-5.47398	-2.53277	-8.83419	-6.75371	-0.228211	0.768547	-7.9273	0.459086	8.20909	-0.0635407	1.02369	-7.23046	-9.49537	2.36245	0.607439	-1.81719	-5.51599	8.74676	4.51868	-9.81084	-4.02242	1.34252	1.73456	-2.31666	-0.0648766	-9.08816	3.57715
522	-1.22022	-5.49907	-3.46323	-9.71914	6.31337	-7.2291	-9.06237	-5.8632	9.87764	-8.4469	-8.51799	-5.89825	3.1251	-1.51737	-0.434639	-5.40982	-10.0365	-5.82637	-2.57974	3.91768	-1.86666	-2.45319	-6.73725	-1.51526	-8.84295	-7.31133	-0.228236	0.600347	-7.90741	1.11601	8.13001	-8.67362	0.774487	-7.27887	-9.5038	2.80918	1.10328	-2.26978	-9.45487	8.90271	5.63458	-9.72247	-3.59839	1.65351	2.31243	-2.41755	0.857196	-9.15696	0.0536977
523	-1.2126	-5.47054	-2.8285	-10.6538	5.88385	-5.92715	-8.8725	-6.75864	9.48172	-8.26433	-8.49108	-5.97749	3.13446	-1.21241	0.00922341	-5.90071	-9.25725	-6.70403	-2.64247	3.9177	-1.80641	-2.70519	-7.75796	-1.88322	-8.88898	-8.36178	-0.218308	0.822747	-7.60025	1.48735	8.11035	-10.3695	-1.17929	-7.27277	-9.49607	2.1897	1.80985	-1.67088	-9.53033	9.05404	4.01382	-9.8613	-3.38044	1.84832	2.49103	-2.03495	-0.275653	-3.73124	0.586617
524	-1.12139	-5.2969	-2.91274	-10.704	6.59492	-6.69394	-8.82275	-5.64358	9.77357	-8.33529	-7.7689	-5.50489	3.09115	-1.8965	-0.588839	-5.31807	-9.97734	-6.81209	-1.42365	3.90961	-1.95437	-3.04741	-5.25561	-2.78006	-8.88869	-8.44584	-0.22432	0.757783	-7.5636	0.905152	8.05399	-9.13331	-3.44123	-7.23128	-9.37324	2.08636	1.26731	-2.17612	-9.55362	9.14623	-9.07003	-9.8595	-4.02739	1.83861	1.52118	-2.10057	0.958408	-7.02793	3.85484
525	-1.17353	-5.59095	-3.86561	-10.0498	6.69306	-6.54872	-8.96752	-5.80563	6.9263	-7.82097	-8.50876	-6.12183	2.99298	-1.75598	-0.290013	-5.9267	-9.99357	-6.6446	-2.26845	3.92154	-1.67922	-3.10515	-6.29379	-2.49681	-8.84861	-8.24419	-0.247011	0.556811	-7.82233	1.30692	8.19053	-10.3681	0.611898	-7.23248	-8.89872	3.25375	1.44916	-1.59801	-9.56638	8.96153	-9.09945	-9.78917	-3.20998	1.48997	1.88103	-2.00284	-0.0971354	-9.16864	4.53002
526	-1.12562	-1.27797	-2.96175	-10.5402	6.21175	4.63274	-9.23261	-5.59247	9.87133	-7.78216	-7.90912	-5.93438	2.88226	-0.84671	0.076805	-5.26633	4.1488	-5.91917	-1.481	3.90893	-1.73474	-2.56191	-7.93513	-1.92914	-8.8861	-9.1649	-0.251597	0.751546	-7.82614	-7.56087	8.17047	-9.16973	0.235712	-7.29094	-9.49313	2.53117	1.41923	-1.44287	-9.57134	9.09284	-9.08276	-9.73621	-3.50515	1.78763	0.327778	-2.02695	1.69781	-3.47577	2.76006
527	-1.19198	-2.52209	-2.89441	-10.7055	5.97227	-10.5256	-9.16889	-7.32692	8.63688	-8.11307	-7.53555	-5.80392	3.10154	-1.84822	0.0624716	-5.54434	5.48416	-5.78654	-2.71517	3.92523	-1.68109	-3.27215	-6.51128	-2.42236	-8.84832	-7.3335	-0.233836	0.506497	-8.0672	-7.47059	8.13176	-8.06093	0.980137	-7.22688	-9.49516	2.57776	1.6295	-2.44089	-8.5222	8.80002	-9.06718	-9.93873	-4.0405	1.62723	2.58217	5.96906	-0.560603	-7.45537	3.09696
528	-1.25093	-2.1499	-2.96973	-9.40867	6.4409	-10.3352	-10.3677	-7.88714	9.74077	-8.73464	-7.69727	-5.72017	2.81167	-1.75622	-11.2869	-5.48518	1.91414	-6.56937	-2.38167	3.92337	-1.83784	-2.89416	-5.30876	0.366657	-8.87786	-9.20656	-0.239223	6.02781	-7.69406	-7.55865	8.12599	-10.2816	-0.876545	-7.2959	-3.54289	2.48029	1.67649	-1.95846	-9.57326	9.14584	-9.09446	-9.93184	-3.47311	1.6809	1.6303	5.96325	1.03442	-7.2246	2.67016
529	-1.20916	-2.61509	-3.98354	-10.5128	6.1083	-10.2733	-8.92999	-6.08808	7.30168	-7.3513	-8.50663	-6.09457	2.77794	-1.65636	-10.4501	-6.10384	3.78525	-5.80655	-2.1587	3.90842	-2.10293	-3.18696	-5.90775	-0.42946	-8.81859	-8.43712	-0.244617	6.64755	-7.99312	-7.45665	8.0652	-9.23607	-3.17142	-7.22641	-4.58394	3.47731	1.76221	-2.01913	-9.57028	9.00443	-9.08178	-9.69661	-4.08115	1.77931	2.06461	5.97564	-0.293596	-3.22733	2.85379
530	-1.21186	-2.02092	-3.38123	-9.55255	6.68888	-10.5191	-10.3754	-6.39273	9.61535	-8.16964	-3.62133	-5.61228	3.12079	-1.64256	-11.2892	-5.44877	3.86832	-5.84143	-1.55218	3.92247	-2.27892	-3.06272	-7.39302	-1.77956	-8.89879	-7.06054	-0.190279	6.15461	4.05099	-7.55466	8.20057	-7.85885	0.486198	-7.28573	-3.06774	2.41007	1.32023	-2.48483	-9.57362	8.76688	-9.09828	-9.68549	-3.26655	1.42037	1.54527	5.97078	-0.373693	-7.68338	3.23127
531	-1.33762	-2.57817	-3.07884	-9.59741	6.58279	-10.3052	-9.07848	-5.79466	6.56517	-8.66626	-3.54482	-5.73359	2.87762	-1.88971	-10.5296	-5.63343	2.10996	-6.39539	-2.77687	3.90798	-1.66039	-3.68638	-7.58039	-1.22974	-8.89938	-7.58557	-0.187717	6.74994	3.96955	-7.50095	8.11222	-10.1576	1.04261	-7.28707	-3.40371	2.63893	1.82476	-1.97183	-8.71771	9.04174	-9.0615	-9.68204	-3.13851	1.65341	1.15711	5.97926	-0.443351	-2.98563	4.41302
532	-1.39164	-3.15731	-4.06758	-10.4721	6.00046	-10.1544	-10.284	-5.76666	9.88335	-7.8157	-3.54965	-5.59373	2.94683	-1.08042	-11.2878	-5.88198	3.61159	-6.46764	-1.62936	3.91343	-1.94653	-3.18406	-5.21174	-2.17422	-8.8293	-9.1557	-0.184866	6.45516	3.99732	-7.55187	8.17664	-8.49157	0.963769	-7.22688	-5.11891	2.24101	1.33723	-1.009	-9.57282	9.49792	-9.08158	-9.921	-3.97981	9.03367	0.249871	5.98327	1.53165	5.03757	3.00204
533	-1.31763	-2.2723	-3.08995	-9.68378	5.84408	-10.4488	-8.89263	-7.87164	8.15913	-7.95668	-3.58644	-6.11579	3.04892	-1.81939	-10.6094	-5.84485	5.39508	-6.53173	-2.82392	3.92783	-2.18253	-3.44693	-6.09379	-2.59161	-8.88566	-8.01935	-0.182875	6.28157	4.09328	-7.48327	1.27653	-10.1647	-1.75998	-7.23753	-3.53501	3.49691	1.80475	-2.83426	-9.45493	9.14254	-9.09045	-9.67277	-3.36164	7.6563	1.37215	5.98902	-0.512689	2.65159	2.93107
534	-1.56139	-1.07998	-2.83923	-10.583	6.03541	-10.426	-9.11985	-5.54672	9.81424	-8.5121	-3.45149	-10.0868	2.89028	-1.58643	-11.29	-5.65615	3.98163	-5.00394	-8.19759	3.91206	-1.74957	-3.17883	-0.847973	-2.11055	-8.78754	-9.19874	-0.182915	6.28223	4.34353	-7.40741	2.57477	-8.46848	0.940915	-7.23293	-3.6116	3.26497	1.20172	-2.38053	-8.61994	9.0458	-9.08732	-9.92047	-3.99515	6.88392	1.82857	5.99485	-0.202951	1.40354	3.40401
535	-1.46773	-2.5101	-2.85817	-10.6205	6.73368	-10.2835	-9.25709	-6.23793	9.55039	-7.561	-3.62869	-9.17545	3.1358	-1.83372	-10.6936	-5.97113	1.75298	-1.07961	-9.04826	3.91145	2.12078	-3.11379	-1.03239	-2.68318	-8.85465	-7.11475	-0.211449	6.56029	3.87805	-7.5415	1.36285	-10.3005	0.48991	-7.299	-3.46045	2.86329	1.72243	-1.1756	-9.57621	9.02636	-9.09881	-9.64065	-3.27649	8.94514	4.49203	6.00214	0.726092	3.71147	2.71766
536	-1.75031	-3.08828	-3.15218	-10.3579	6.71866	5.8278	-10.3863	-7.51359	7.93367	-7.90726	-3.36247	-10.1801	3.03255	-5.93842	-11.2584	-6.12233	3.51029	-0.442792	-8.29027	3.92522	2.13279	-4.19333	-0.830284	-0.198572	-8.79818	-9.21804	-0.206031	6.38904	4.18045	-7.54114	2.39612	-8.51895	-1.46741	-7.30469	-3.68675	2.23501	1.2989	-2.8719	-8.78175	8.79922	-9.05637	-9.91486	-4.01338	6.8746	3.88743	6.06757	-0.360347	0.146973	4.3585
537	-1.43942	-2.30484	-3.45346	-9.87367	6.01355	5.5008	-8.51469	-5.76632	6.74557	-7.68884	-3.64992	-8.94149	3.16952	-5.37526	-10.8027	-6.0005	5.2525	-4.26422	-9.0243	3.91019	2.15971	-4.42904	-1.0396	0.540098	-8.75442	9.92163	-0.200444	6.48801	3.90341	-7.39209	1.4622	-10.3488	-2.29889	-7.22286	-4.84531	3.39837	4.96222	-1.61542	-9.57809	9.3682	-9.05105	-9.90872	-3.14942	7.44919	4.42514	5.94951	-0.132467	3.88589	2.85159
538	-1.84371	-1.44856	-3.24855	-10.6964	6.66821	5.74388	-10.1155	-7.6705	-0.174122	-8.68367	-3.5873	-9.75452	2.97488	-7.0471	-11.2897	-6.30833	3.2031	-3.28454	-8.96707	3.92572	2.18813	-3.09242	-0.845636	-1.75473	-8.85167	5.81088	-0.196336	6.17158	3.89727	-7.55308	2.73715	-8.8899	0.512363	-7.29666	-6.034	2.72783	4.96953	-0.942308	-9.47861	9.14299	-9.09459	7.24857	-3.15855	6.77705	4.39109	5.9522	1.43565	-0.123629	2.9845
539	-1.77267	-2.275	-3.24888	-9.34823	5.83726	5.64431	-8.4358	-7.85185	0.949871	4.81995	-3.32647	-9.58291	3.1427	-5.58571	-10.9191	-5.59501	3.72134	0.60949	-9.01589	-10.0152	2.15966	-3.94558	-0.839672	-0.965819	7.40283	6.8073	-0.191895	6.37408	3.87915	-7.43854	1.43476	-8.66402	1.09379	-7.23352	-3.55869	2.34516	4.74685	-2.84904	-9.57993	9.11907	-9.07825	8.71973	-3.19602	7.77622	3.54613	5.96069	-0.72248	4.09201	3.63005
540	-1.70154	-2.38532	-2.84432	-10.7043	6.07909	5.8049	-9.04885	-5.73944	1.84298	4.76189	-3.51105	-10.1525	2.92122	-7.14528	-10.8718	-6.29877	3.36339	-0.64335	-8.36817	-10.1126	2.02537	-3.02356	-1.01294	-2.97996	6.79022	9.3027	-0.182335	6.54324	3.99279	-7.42608	2.9085	-9.60329	0.457983	-7.23066	-3.62295	2.85153	4.73282	-2.5949	-8.85094	9.23926	-9.09571	7.82133	-4.02731	7.77727	4.47245	6.04915	-1.2353	5.21251	3.83201
541	-1.64147	-0.694402	-3.27345	-1.06747	6.58906	5.80149	-9.37845	-7.75325	2.87931	2.0589	-3.54524	-9.39148	3.1148	-5.12196	-11.0861	-5.39456	1.64097	0.786126	-8.87949	-10.0585	2.0651	-3.03621	-1.00975	-2.32673	5.8532	9.04471	-0.179868	6.41559	3.93315	-7.5466	1.47626	-8.5757	-2.02679	-7.2343	-3.49986	2.14273	4.58789	-2.06656	-9.58578	8.78218	-9.0811	8.17506	-4.04154	6.82681	4.39046	6.04709	-0.945216	4.27039	4.68
542	-1.64078	-1.72573	-3.68482	0.323246	6.10529	5.82639	-4.06103	-3.03758	-0.0416624	5.02639	-3.59012	-9.90137	3.16454	-6.68661	-10.9151	-5.37489	5.08905	-4.01973	-8.46732	-10.1005	2.05817	-3.05647	-1.02392	-2.41468	7.42173	10.3523	-0.180838	5.99887	4.14674	-7.52621	2.96291	-9.74889	3.19119	-7.26822	-3.1033	3.94844	4.95612	-1.27872	-8.91732	9.13418	-9.06329	8.73887	-3.94966	8.81764	3.44773	6.03996	-0.458456	1.22885	4.07048
543	-1.68094	-2.44139	-2.86045	0.419274	6.33564	5.76428	-4.6378	-1.19648	2.67573	6.70852	-3.49584	8.32469	3.1846	-4.94609	-11.2925	-6.19258	3.00358	-1.80229	-8.55589	-10.0512	2.08863	-4.78187	-1.02679	0.0145816	5.87117	7.66956	-0.179814	6.07767	4.19245	-7.53455	1.47438	-8.55317	3.26079	-7.26379	-5.61443	2.83979	4.58152	-1.84466	-8.99481	8.79664	-9.06904	7.71402	-3.99612	7.05056	4.51441	6.04084	1.21062	3.53384	3.0011
544	0.31502	-2.60537	-2.86713	0.131866	5.88744	5.81533	-4.1978	0.446238	1.64192	2.25045	-3.31563	8.4776	2.85834	-5.1377	-10.7848	-5.47402	1.5894	-1.31859	-8.6532	-10.07	2.10404	-2.99784	-0.848291	-2.84285	6.90997	9.7871	-0.182459	5.93656	4.03662	-7.53376	1.43631	-9.90031	4.27415	-7.30303	-3.52144	2.17311	4.71968	-2.52825	-9.58726	9.06763	-9.0851	8.32178	-3.9971	9.06824	4.28576	6.06125	0.999229	6.19336	4.32236
545	0.84	-3.23158	-3.38591	0.462569	6.19098	5.67147	-4.73174	0.890137	-0.200633	4.90677	-3.35442	8.41678	2.9494	-6.177	-10.677	-6.2194	4.85437	-4.50964	-8.53443	-10.0946	2.29888	-3.00572	-0.852888	7.01676	7.32291	9.21153	-0.184409	6.91533	4.06742	-7.52192	2.75407	-8.62232	4.01381	-7.22917	-3.14124	4.86526	4.71054	-2.65938	-9.09107	8.74842	-9.09628	8.24495	-3.75918	6.71195	3.42474	6.05835	-0.196317	2.37647	2.94736
546	0.888156	-2.69329	-3.02111	0.409309	6.19223	5.81237	-3.45006	1.34011	-0.145946	6.93128	-3.41205	8.27215	3.09535	-7.0284	-11.298	-6.30763	1.54972	-0.0742976	-8.68884	-10.0701	1.98852	-4.63405	-0.840149	8.42293	5.64314	7.04053	-10.6787	5.86839	4.06142	-7.55766	1.39674	-10.2739	3.17341	-7.25722	-4.08495	2.03282	4.91919	-2.07315	-9.58589	8.81428	-9.07284	7.77255	-3.6364	6.69533	4.36978	6.05577	-1.09036	-0.39454	2.98423
547	0.796099	-2.40005	-2.90868	-0.639827	6.20513	5.60716	-4.21916	-2.16998	2.05475	2.4182	-3.44307	8.24824	2.97764	-5.72115	-10.5569	-5.50873	2.80334	1.34816	-8.73504	5.89126	2.31631	-2.99233	-0.843905	8.42522	6.91599	5.96571	-10.67	6.844	4.19048	-7.35613	2.85009	-8.44631	3.1991	-7.2472	-3.58947	5.08559	4.70032	-0.967374	-9.18907	9.1481	-9.05319	8.73715	-4.06333	9.12267	3.4793	6.05309	-1.48269	0.442794	2.91552
548	0.318061	-2.35724	-2.87567	0.44369	6.34734	5.74136	-3.80064	-0.636396	0.363819	4.5801	-3.43767	8.49492	2.87865	-5.73941	-10.9112	-6.26522	4.63406	-3.02069	-8.19015	5.18612	2.00822	-2.98749	-0.833603	7.39126	5.77688	8.93678	-10.6833	5.88592	4.21881	-7.50743	2.68719	-9.29347	4.13705	-7.26831	-4.3287	4.12781	4.93645	-0.943125	-9.56812	9.10503	-9.09203	8.75234	-4.02602	6.6725	3.78891	6.05248	1.68064	5.45413	4.31423
549	0.315487	-1.58769	2.63374	-0.811889	6.47167	5.82947	-4.36323	0.980155	3.05817	6.48044	-3.28394	8.4047	2.80939	-5.04667	-10.456	-5.51046	5.53026	0.970819	-8.72927	5.76037	2.2403	-3.0019	-0.83942	7.62159	7.14242	10.3449	-10.6729	6.92534	3.97559	-7.55429	1.42821	-8.26461	3.84273	-7.30677	-3.02813	2.92248	4.88791	-2.11112	-9.57137	8.84871	-9.05184	7.6486	-4.07548	7.21815	4.12147	6.01601	-1.25972	1.83864	4.30903
550	0.299085	-2.2931	2.80378	0.444569	5.97463	5.82209	-4.76614	-1.41026	0.112134	4.45692	-3.35679	8.18299	3.15793	-4.95814	-10.387	-6.29183	2.32606	-3.77372	-8.3333	5.54522	2.27	-2.98213	-0.828369	8.62246	6.49797	7.92717	-10.6821	6.94496	4.4526	-7.36345	2.70569	-8.65394	3.32328	0.914054	-3.5739	2.57416	4.6882	-2.13138	-9.26899	8.75871	-9.09434	8.4411	-3.88957	9.08494	4.20765	6.01166	-0.988179	-0.634594	4.3058
551	0.292447	-3.22095	2.20912	0.296009	6.48341	5.82723	-3.65704	0.590134	0.78395	4.69063	-3.53751	8.43116	3.07064	-7.16034	-11.2983	-5.54144	1.47324	-2.24853	-8.76322	5.66074	1.97201	-2.98545	-0.899029	6.86426	5.46209	8.62995	-10.6824	5.89081	3.96024	-7.52472	2.69944	-9.35654	3.48841	0.493424	-5.8379	2.72367	4.97484	-2.71638	-9.57338	9.15879	-9.05536	8.72957	-4.0328	6.86409	3.97604	6.01502	1.93061	4.47607	4.3304
552	0.293134	-2.84873	2.94487	-0.873254	6.06854	5.69083	-3.88255	-2.88279	3.42938	6.02087	-3.33609	8.47686	3.26556	-7.0072	-10.3708	-6.22794	4.45364	1.55269	-8.09138	5.83282	2.20244	-6.46714	-0.890679	8.35914	6.69377	9.13197	-10.6684	5.87397	4.34141	-7.55511	1.522	-9.45554	4.42633	0.890158	-3.85993	2.31434	4.90223	-1.39285	-9.3547	-0.860837	-9.08933	7.66778	2.51602	8.42594	4.4024	6.01046	-1.37502	0.998392	2.93893
553	0.299551	-1.86597	2.39825	0.671217	-0.237745	5.63377	-4.25319	-2.41298	1.2104	4.32692	-3.3108	8.14308	2.55179	-7.01523	-11.2229	-7.04685	5.51415	-4.75858	-7.81417	5.30857	2.33075	-6.23399	-0.928667	8.33683	6.59283	6.13361	-10.6703	6.78477	4.47695	-7.34403	1.6209	0.760024	3.68203	0.474778	-3.21737	1.97474	4.97249	-2.79829	10.1735	-1.00072	-9.07302	8.37836	-0.0649139	6.85661	3.55758	6.00723	0.314954	4.8986	3.03164
554	0.290721	-0.885692	3.16852	-0.921748	-0.0205929	5.77604	-4.03802	-0.932431	2.34572	6.25539	-3.29468	8.38056	3.76566	-5.24225	-10.3517	-7.04895	2.57453	-1.55833	-8.80046	5.5298	2.32783	-6.05049	-0.914311	8.5177	6.5096	9.65592	-10.6687	5.88039	4.54612	-7.51262	1.68693	1.10046	3.23945	0.892904	-3.59869	2.93294	4.66533	-2.22559	10.171	-1.6997	-9.05042	7.92054	0.936912	8.94738	3.60967	6.03356	0.558335	3.34476	2.96829
555	0.320427	-2.51997	2.39099	-0.994557	-0.685196	5.82308	-3.89769	1.40388	-0.064787	5.64236	-3.62912	8.3916	3.81652	-5.35511	-11.2959	-7.03785	4.3256	0.26716	-8.05681	5.23701	2.32435	-6.68579	-0.86986	7.22249	6.27637	6.33487	-10.6799	6.87298	4.50121	-7.55811	2.74952	1.87102	3.3611	0.460791	-3.53385	4.29956	4.64757	-2.76417	10.173	-1.43608	2.68385	8.50434	2.76782	8.64597	3.78452	6.02442	-2.15866	2.12022	4.33246
556	0.299799	-2.97136	1.78958	0.958736	0.0035118	5.26344	-4.31592	1.04638	0.138208	3.81502	-3.27972	8.42852	3.33383	-5.23379	-10.3861	-7.0594	5.52336	0.0989631	-8.83875	5.90113	2.30834	-6.13414	-0.8606	7.87728	6.49037	7.23341	-10.6788	6.55017	4.48387	-7.3475	1.07141	-0.286935	3.54175	0.886122	-5.37665	4.47303	4.87383	-1.24108	9.97337	-0.862394	2.71557	7.52575	0.660745	7.80873	4.00148	6.03205	-0.684863	5.71334	9.40099
557	0.332368	-5.44066	3.17126	1.38012	-0.0123833	5.69236	-4.63772	0.703204	1.0737	5.81591	-3.37673	8.15966	3.65036	-7.1416	-11.297	-7.05423	-9.91881	-2.49919	-8.06559	5.45437	2.3212	-6.43713	-0.880339	7.11309	6.85643	10.2365	-10.6786	5.93437	4.2535	-7.82087	1.78163	0.674634	4.37663	0.735604	-3.03347	3.5434	4.8423	-2.81603	10.1724	-1.52785	2.6788	7.63107	0.870713	6.85152	3.92205	6.0199	2.41783	3.15116	9.25283
558	0.346646	-6.66834	2.54141	-0.471837	-0.318314	5.77351	-3.42918	-1.60159	3.24888	3.56295	-3.2835	8.40477	2.62142	-5.00929	-10.8646	-7.0399	-9.69108	1.15698	-7.91865	5.37144	2.26741	-6.01986	-0.977138	8.4475	6.3864	8.15993	-10.6757	6.67592	4.36393	-8.33924	1.18127	0.882287	4.39271	0.780963	-3.31596	5.32288	4.63612	-1.06592	10.004	-1.53117	2.71014	7.58267	2.98204	8.65556	3.72584	-7.17651	-1.59935	0.722934	9.24415
559	0.416034	-7.10473	2.87417	-0.431637	-0.0477158	5.82966	-4.47837	0.228006	0.585902	5.40283	-3.27936	8.34294	3.39068	-6.87191	-10.6572	-7.03616	-10.056	-2.7611	-8.87447	5.37502	2.22405	-6.42944	-1.00298	8.6951	6.99013	8.40745	-10.6789	0.75825	4.38749	-7.92548	0.982311	1.96121	3.5574	0.652465	-9.48895	2.40826	4.62714	-2.04014	9.98617	-1.31356	2.6678	8.58581	0.0042237	6.84652	3.57936	-4.54923	-1.03778	1.59749	9.404
560	0.367219	-6.93878	2.86084	1.22978	0.000608429	5.82359	-4.35366	-2.62756	2.21377	4.18582	-3.46295	8.39619	2.73563	-5.53509	-10.5008	-7.07641	-9.73319	-0.249491	-8.13904	5.20116	1.88707	-6.55412	-0.995883	6.73711	6.04226	9.39805	-10.6715	-0.526348	4.50506	-7.7343	1.89537	-0.265161	3.80316	0.933488	-8.5367	3.31218	4.85963	0.711935	10.0349	-0.906087	2.7221	7.8684	-0.00849977	8.16603	4.2613	-6.97915	0.781442	2.93326	9.22398
561	0.391787	-7.31497	2.95366	1.48724	-0.603612	5.70578	-3.85373	-0.334309	-0.0147445	5.50404	-9.23405	8.16923	3.16517	-5.46265	-11.0214	-7.06457	-10.086	-0.85321	-8.01559	5.87303	1.97925	-6.59396	-0.950508	8.41527	6.70857	5.67247	-10.6801	-4.20469	-3.11245	-8.11537	2.03145	0.821604	3.42527	0.565861	-9.50343	2.81699	4.6175	0.842064	10.1718	-1.15287	2.65701	8.66085	3.02068	6.85937	4.07994	-4.70394	-2.3979	5.95625	9.41039
562	0.480033	-7.07548	2.49589	0.967741	-0.960883	5.62008	-3.62945	1.46798	3.59184	4.02417	-10.1633	8.21084	3.20093	-4.96333	-10.7785	-7.06494	-9.87772	-3.53583	-8.95527	5.22834	2.28986	-6.05154	-0.941812	7.09819	6.14897	8.79585	-10.675	-3.452	-3.11613	-7.99685	2.20433	1.58956	3.64436	0.87692	-8.35273	1.99286	4.82722	2.37612	10.1719	-1.63706	2.71327	7.4231	-0.0611766	7.94191	4.14717	-5.08399	-0.861948	4.62272	9.20935
563	0.516975	-6.30542	2.00263	-0.385163	0.0471617	5.72536	-4.73861	1.13113	0.147388	2.60889	-10.0627	8.23733	2.85855	-6.43274	-10.6059	-7.05785	-9.99092	-2.02596	-8.09619	5.17458	2.20402	-6.10954	-0.964062	8.51734	6.56416	9.51873	-10.687	-0.16716	-3.10311	-7.96356	3.47891	-0.193476	4.43598	0.517187	-9.50817	3.75644	4.81132	2.26817	10.0211	-1.15605	2.64798	8.01673	1.75709	-2.38288	3.44724	-6.64838	2.18936	10.122	9.18533
564	0.450065	-5.29088	3.16194	-0.422964	-0.0606381	5.83356	-4.33674	-2.75454	0.0426183	5.31358	-8.9288	8.43219	3.85317	-7.09397	-10.3637	-7.0834	-10.1035	0.435909	-8.11461	5.92377	2.24621	-6.49401	-0.963005	8.10568	7.44577	6.56044	-10.683	-3.69893	-3.16336	-8.34694	4.01713	0.552923	4.17031	0.85371	-9.41476	5.56079	4.60643	1.55859	10.1482	-1.00458	2.74894	7.96174	2.00519	-1.92677	3.69898	-4.86562	-0.67286	10.5064	9.41769
565	0.626731	-7.28672	2.44517	1.12287	-0.282285	5.38596	-4.49537	1.55688	1.47375	2.8178	-9.91063	8.35608	3.24466	-5.05895	-10.9464	-7.07957	-9.80617	1.31559	-9.5455	5.58798	1.93377	-6.18586	-0.330144	7.05248	5.90183	10.0922	-10.6754	0.979575	-3.36719	-8.30199	3.26068	0.794852	4.30361	0.450975	-9.4995	2.50403	4.59196	2.28085	10.1362	-1.31294	2.64842	8.72091	0.40205	-0.556544	4.2954	-6.80023	-1.93453	10.342	9.16144
566	0.594094	-7.26502	2.65959	-0.39929	-0.902699	5.79336	-4.50241	-0.0367035	2.50638	3.29278	-8.93494	8.316	3.80766	-7.08013	-10.7255	-7.07204	-10.1179	0.461453	-9.49816	5.13507	2.16283	-6.30841	-3.81026	8.52174	7.14332	7.43079	-10.6743	-3.94812	-3.18088	-8.00767	3.94408	1.74723	3.97425	0.334731	-8.72856	3.06557	4.76693	1.44449	10.1287	-0.948454	2.73595	8.09437	0.764222	-1.25419	-3.71752	-3.4315	0.0589162	10.6815	9.13857
567	0.273225	-5.71082	2.59731	-0.326201	-0.368728	2.9989	-3.31365	-1.77309	1.32943	5.13161	-9.63373	8.15692	3.00104	-0.535338	-10.5727	-7.08457	-9.41022	1.2206	-9.56176	5.92517	2.12827	-6.94512	-0.102649	6.5943	5.96324	-9.40144	-10.6738	-4.70561	-3.14468	-7.7674	3.60149	2.00591	3.89418	0.837982	-9.5055	2.06969	4.78977	0.57167	10.1211	-1.37991	2.77157	8.73158	2.25995	-1.83255	-3.32497	-3.6399	-1.74228	10.2111	9.11399
568	0.559175	-4.1718	3.11909	-0.437313	0.112482	3.03251	-3.90539	-1.97669	0.113891	3.03484	-9.06487	8.35067	3.21679	-3.35199	-10.448	-7.09259	-10.1241	1.58859	-9.50703	5.80916	2.60199	-6.47327	-3.30394	8.52156	5.86652	-9.47839	-10.6752	-0.334859	-3.35947	-8.35871	4.05199	1.42032	3.89114	0.306699	-9.48258	2.28011	3.28614	2.0146	10.1689	-0.713509	2.64619	7.32089	0.200371	-2.48034	-2.76689	-6.51345	-0.801907	1.40856	9.06238
569	0.288292	-6.04354	3.03169	-0.449258	-0.0724293	3.05077	-4.11236	0.791561	6.8605	5.22744	-9.99986	8.2777	3.35549	-1.77061	-10.9031	-7.08894	-9.51041	0.0247856	-9.51679	5.07794	2.70371	-6.70096	-3.61786	8.42707	7.29185	-9.40457	-10.6772	-3.00603	-3.15047	-7.77192	3.35929	0.796652	3.89338	0.344766	-9.48431	4.65785	-0.516939	2.19004	10.1632	-1.2333	2.76563	-1.70909	-0.0114862	-2.56893	-3.70734	-3.82667	-7.23319	2.63921	9.08671
570	0.755863	-6.95272	2.75926	-0.14495	-0.410359	3.02498	-3.8107	-3.26615	6.90889	-3.52579	-9.65064	8.19397	3.26814	-2.09044	-10.3362	-7.22308	-10.1227	0.814702	-9.53843	5.85151	2.90403	-6.80324	-3.43577	6.98718	3.61877	-9.41861	-10.6783	1.21509	-3.3653	-8.09864	3.93707	-0.0842299	3.88977	0.673189	-9.50276	2.90263	3.60547	1.92964	10.157	-1.56827	2.64471	-1.61149	0.546358	-2.0093	-2.73327	-6.46698	-7.37444	3.80638	9.03673
571	0.712579	-6.73641	3.0971	-0.0100811	-0.792157	3.18028	-3.3245	-2.82053	6.91885	-4.46698	-9.32411	8.41792	2.6457	-2.83112	-10.6797	-7.0838	-9.54727	0.956944	-9.55966	5.18089	2.7266	-7.02672	-0.963419	8.32477	4.12609	-9.3799	-10.6762	-1.54032	-3.12976	-8.21822	3.75883	1.24824	3.8912	0.560468	-9.50381	0.243814	-0.193025	1.80314	10.1054	-0.803107	2.64562	-1.4344	2.46141	-0.475336	-3.2408	-6.48544	-7.5132	3.99842	9.00554
572	0.278195	-6.59808	3.01757	-0.475457	-1.04832	3.05294	-4.49151	1.25771	6.89267	-5.34574	-9.82291	8.42644	2.59872	-2.08654	-10.5508	-7.18854	-10.1328	1.11306	-9.54929	5.71862	2.17646	-6.8523	-1.17107	8.78301	3.41581	-9.41828	-10.6797	1.41982	-3.13105	-7.90726	3.44451	0.0657902	3.89186	0.789693	-8.3476	0.158848	4.311	1.67117	10.1118	-1.09853	2.64781	-1.5522	1.02177	-1.48409	-2.78593	-6.45875	-6.98555	5.40351	9.39394
573	0.30112	-3.75074	2.4154	-0.892723	-0.0892947	2.71572	-4.85277	-0.652638	6.82113	-4.34485	-10.0424	8.2201	3.16895	-3.28229	-10.4244	-7.10962	-9.61622	0.276071	-9.51988	5.07445	2.3798	-6.65781	-0.761343	8.29229	3.96484	-9.3154	-10.6813	-3.22351	-3.13717	-8.3635	4.01725	0.813271	3.89247	0.442327	-8.9128	0.358101	-0.153095	2.52333	10.1162	-1.45796	2.65188	-1.11304	2.27497	-0.872974	-2.85395	-4.06872	-7.10214	4.19356	9.3938
574	0.6669	-6.51339	2.67602	-0.0981108	-0.481441	3.00469	-4.82786	-5.468	6.904	-3.43411	-8.69012	-8.92902	3.14321	-1.08279	-11.1759	-7.15502	-9.09772	0.792526	-9.56535	5.82349	2.12767	-7.24983	-0.5587	6.94559	3.42974	-9.28338	-10.6768	-4.45479	-3.12029	-8.03925	3.70352	2.01735	3.89314	0.409303	-8.39515	0.381598	4.32383	1.47903	10.1211	-0.989926	2.6705	-1.27813	1.51553	-0.515339	-2.6976	-6.4518	-7.70551	-0.103314	8.92376
575	5.68995	-5.82982	2.40172	0.10374	-0.124528	2.7608	-4.84056	-3.89678	6.82669	-5.43031	-9.43139	-8.828	2.56064	-3.52001	-11.088	-7.08131	-10.1295	0.697937	-9.54771	5.10672	2.92241	-7.24446	-2.03473	8.72002	3.83093	-9.33667	-10.6757	-2.08245	-3.12636	-8.32263	3.27409	0.82117	3.89008	0.898551	-9.50843	0.1384	-0.463654	2.20036	10.1174	-0.750466	2.79186	-1.22318	1.26538	-1.37232	-2.83603	-4.33764	-7.72881	1.15148	8.95005
576	5.53553	-4.44916	2.7315	-0.417291	-1.10237	2.74422	-4.82219	-4.74992	6.9382	-4.70041	-10.0973	-8.72319	3.51801	-3.45885	-10.0975	-7.06222	-10.1305	0.934608	-9.50911	5.24797	2.94853	-7.16538	-1.78485	-4.67933	3.72518	-9.37151	-10.6777	1.59426	-3.23942	-7.84415	3.92034	0.23071	3.89872	0.897575	-9.12908	0.237777	3.88686	2.08092	10.1161	-1.6352	2.70491	-1.06193	3.05871	-1.32768	-3.67655	-6.00572	-6.51177	4.38257	9.42563
577	5.56628	-6.43345	2.54226	-0.102006	-0.502293	2.89872	-4.86468	-6.75139	6.89789	-5.80235	-10.1317	-8.85112	3.41042	-1.91334	-11.1845	-7.06073	-9.20526	0.200809	-9.52237	-9.85297	2.09436	-7.09252	-2.56647	-4.86219	3.96205	-9.28873	-2.59298	0.337995	-3.29481	-1.27672	3.33988	2.00433	3.89287	0.369719	-9.51858	0.11972	0.145895	1.67491	10.1143	-1.6864	2.65511	-1.5216	0.709745	-1.07973	-3.3313	-6.06593	-6.40095	3.59319	8.98321
578	3.27881	-3.93763	3.06886	0.255025	-0.103115	2.65132	-4.86043	-3.40034	6.96901	-3.72849	-9.43335	-8.93719	2.53062	-2.97939	-9.79544	-7.04867	-9.28268	-0.0538516	-9.57315	-9.95251	2.49259	-7.25904	-2.29943	-4.32051	3.84598	-9.38911	-2.36064	-1.26352	-3.25159	-1.31761	3.90259	0.992861	3.89675	0.376193	-9.4887	0.291783	4.08195	2.0689	10.0429	-0.88457	2.80707	-1.38304	0.710051	-0.651116	-3.66364	-6.1628	-6.50854	5.61849	9.40572
579	6.09072	-5.62834	3.14233	0.203177	-0.181497	2.82725	-4.83017	-4.46562	6.81244	-2.94379	-10.1689	-8.70759	3.39153	-1.99954	-11.0548	-7.04071	-10.1332	0.878578	-9.48466	-10.0797	2.81244	-7.21232	-2.80624	-4.73813	3.38364	-9.42962	-2.46079	-2.57104	-3.3057	-1.23131	3.71259	0.808473	3.89255	0.88255	-8.48248	0.27783	4.25402	1.75405	10.052	-0.702058	2.71283	-1.59192	0.850821	-2.63671	-3.43811	-3.1786	-7.70325	6.421	8.89243
580	3.66998	-5.0478	-4.91633	-0.0800292	-0.450173	2.57645	-4.8442	-1.83361	6.8887	-5.15861	-9.92505	-8.82169	3.40635	-1.51737	-10.4904	-7.03356	-10.135	1.61714	-9.55072	-10.1625	2.19936	-6.84122	-3.18819	-4.86404	3.58868	-9.46321	-2.91789	1.75096	-3.26438	-1.30187	3.81293	0.400975	3.89908	0.354619	-9.50441	0.508494	4.31744	1.37328	10.0637	-1.62066	2.69276	-1.10695	2.90715	-0.790372	-2.70717	-6.31891	-6.45779	2.39609	9.40491
581	3.49392	-7.21277	-4.93312	-0.0917891	-0.209706	2.92706	-4.84047	-5.60511	6.89608	-4.59638	-10.0281	-8.86187	2.52243	-2.38314	-11.2096	-7.03559	-9.32405	1.6515	-9.525	-8.96291	2.27012	-6.98912	-3.02454	-4.5564	3.57164	-9.16189	-2.75664	-0.00977032	-3.22365	-1.25152	3.82132	-2.19987	3.89648	-8.76022	-9.48688	0.311191	-0.357207	1.84054	10.0765	-1.71449	2.7798	-1.4205	0.761162	-1.66558	-3.42368	-5.8556	-7.63864	0.381341	9.43696
582	5.61463	-6.80936	-4.99374	-0.332196	-1.15243	2.94773	-4.86664	-4.18003	6.89399	-5.92383	-9.93574	-8.83196	3.29582	-3.40062	-11.1162	-7.0306	-10.1343	0.133791	-9.51136	-7.47117	2.84261	-7.11784	-0.815214	-4.81451	3.34166	-9.27265	-2.32797	-2.79751	-3.27618	-1.65145	3.3866	-0.548974	3.88902	-9.93645	-9.48769	0.190375	0.720288	1.93149	10.0914	4.30076	2.71101	-0.953082	2.70213	-2.0952	-2.92993	-5.33087	-6.39985	-0.344033	9.38327
583	5.90089	-7.18743	-5.22532	-0.0550706	-0.527367	2.55491	-4.83397	-0.460675	6.91502	-3.63754	-10.1436	-8.94027	2.70363	-3.51532	-9.51002	-7.03334	-10.126	-0.0167292	-9.5675	-8.9594	-1.60977	6.85483	-0.958804	-4.82165	3.58592	-9.45873	-3.38597	-1.81719	-3.23176	-1.41513	3.58493	-2.19718	3.89905	-9.94573	-8.42252	0.174975	4.37627	1.55965	10.0992	4.71925	2.67329	-0.950248	-11.1177	-2.28465	-3.02028	-5.60378	-7.62955	4.57562	9.32712
584	5.24758	-4.75322	-4.95516	-0.38818	-1.94496	2.98565	-4.83507	-2.93638	6.9881	-3.03695	-9.18708	-8.75802	2.68658	-0.869353	-11.2198	0.836732	-10.1224	0.0720732	-9.51273	-7.56336	-0.663684	6.85223	-0.828449	-4.88665	3.46666	-9.28003	-3.24364	-4.96652	-3.21443	-1.46729	3.7331	-1.17126	3.89584	-7.60209	-9.50854	0.257733	0.436805	1.42774	-0.128031	4.35041	2.78094	-0.920096	-11.1152	-2.1815	-3.73504	-5.9584	-6.68572	-0.589015	9.28552
585	5.65191	-7.31666	-5.27555	0.0271983	-1.99041	2.59467	-4.84704	-5.73502	6.89636	-5.26492	-8.80242	-8.87388	2.68428	-3.22517	-8.01352	0.689854	-9.05106	1.49853	-9.47583	-10.0464	-1.08806	6.89089	-1.28758	-4.78218	3.70018	-9.28591	-3.08185	0.148293	-3.34076	-1.40401	3.91268	-1.90436	3.89975	-8.55839	-9.48829	0.335357	1.34467	2.30049	-0.318026	4.99638	2.69793	-1.27345	-11.1004	-0.46753	-3.14096	-7.65527	-6.92841	1.90944	9.29967
586	5.78977	-5.54237	-6.07278	-0.0489072	-1.98524	2.92502	-4.86509	-6.47219	6.97873	-5.70569	-9.03034	-8.95967	2.70836	-2.02677	-9.22948	0.615606	-10.1184	-0.0383356	-9.52519	-8.90482	-1.11855	6.86749	-1.52783	-4.6237	3.31943	-9.44982	-3.5752	-2.33167	-3.21931	-1.85837	3.33268	-2.09555	3.89438	-9.9445	-9.34108	0.537774	4.40928	1.18302	-0.487457	4.3614	-0.862141	-1.51105	-11.1238	-0.559681	-3.6395	-7.52619	-7.58918	5.83323	9.27681
587	5.01288	-0.496043	-5.15543	-0.00781261	-1.89007	2.68956	-4.86157	-1.50783	6.98754	-3.28055	-9.66555	-8.83431	2.65608	-2.06477	-11.1267	0.516774	-9.01164	1.43784	-9.51417	-9.88363	-1.53732	6.84024	-0.903149	-4.89931	3.38171	-9.44067	-3.50314	-0.751875	-3.35238	-1.57596	3.88509	-1.10311	3.89857	-8.37172	-9.5141	0.0593508	1.02738	1.46842	0.651336	4.85308	1.06435	-1.19737	-11.1153	-1.5839	-2.72253	-5.97564	-7.64697	0.895589	0.252716
588	5.99499	-0.836116	-5.17158	-0.31105	-1.79221	2.81134	-4.83899	-4.97698	6.90774	-5.00976	-3.51074	-8.74296	2.71059	-3.47035	-11.1931	1.21876	-8.70485	1.17897	-9.58938	-8.8056	-1.0302	6.84571	-1.07426	-4.73316	3.39077	-9.42516	-7.71038	0.527085	-3.3129	-1.67117	3.62232	-0.428409	3.89683	-9.84004	-8.43672	0.219622	1.65958	2.19464	-0.563521	4.30613	-1.28002	-1.57901	-11.1188	-1.74332	-3.54796	-7.34855	-6.81344	2.15629	0.170741
589	5.46221	-0.578859	-4.94638	-0.204242	-2.0444	2.8291	-4.85859	-3.641	6.98355	-4.09402	-2.27955	-8.89039	2.71192	-1.71506	-10.7592	1.11295	-9.84751	0.898812	-9.4767	-8.623	-0.742045	6.88119	-1.52262	-4.47923	3.80535	-9.32542	-7.89006	-0.997041	-3.19133	-1.5004	3.99242	-2.32228	3.89592	-8.20898	-8.431	0.453136	4.41766	0.997863	0.600443	5.12974	0.808873	-1.05186	-11.0463	-1.11903	-3.73466	4.45984	-6.44656	3.36284	0.0814574
590	4.33235	0.15815	-4.91436	-0.491959	-1.86665	2.75331	-4.84826	-7.03775	6.9459	-3.08454	-3.12936	-8.84411	2.80621	-3.54267	-8.96281	1.0207	-8.54064	0.869187	-9.55597	-7.66896	-1.48101	6.84069	-1.57163	-4.88046	3.95569	-9.42866	-8.00489	-9.01935	-3.33014	-1.21882	3.37944	-1.70463	3.89864	-8.04093	-3.25926	0.081334	4.39005	1.55278	0.643048	4.72947	-1.62489	-0.96663	-10.9873	-0.614041	-3.21071	4.23926	-7.75594	0.63877	-0.00125177
591	6.13749	-0.619907	-4.99793	0.0504966	-0.898365	2.9321	-4.84458	-0.288107	6.96751	-3.83069	-3.33752	-8.96136	2.70398	-0.677304	-10.9299	0.952349	-9.25005	1.10492	-9.52631	-8.73673	-0.489983	6.84246	-1.37439	-0.452786	3.35763	-9.44123	-7.57101	-9.01275	-3.2016	-1.37067	3.81519	-2.16448	3.89097	-9.93146	-2.91615	0.47265	2.63519	-8.92231	-0.0552767	4.91611	-0.44324	-1.35507	-11.1042	-0.720383	-3.49758	4.10593	-7.88434	6.0338	1.31804
592	6.23194	0.307305	-5.06307	0.114167	-1.87875	3.03815	-4.85139	-5.92337	6.87285	-5.0887	-2.66229	-8.89816	2.5761	-2.10622	-10.6224	1.55729	-9.45266	1.20534	-9.48484	-7.70776	-1.6736	6.8636	-1.33446	-0.609376	3.66162	-9.40009	-8.09011	-9.01722	9.22832	-1.27983	3.50119	-0.986665	3.89436	-9.5461	-2.91036	0.20795	4.37009	-9.33682	0.463233	4.4994	1.58514	-0.865668	-11.1165	-0.491485	-3.04625	4.48983	-6.55804	5.18133	1.32241
593	4.55603	-0.728497	-4.91187	-0.272855	-1.83648	3.13049	-4.83873	-1.22553	6.91244	-3.35133	-3.64348	-8.7922	2.75712	-2.19737	-8.27936	1.37803	-9.56897	0.854051	-9.51459	-8.83846	-0.542667	-1.88048	-1.14988	-0.550987	3.38424	-9.21881	-7.95374	-9.01333	9.2181	-2.20579	4.01559	-0.269367	3.89177	-9.26314	-2.96602	0.0706772	1.98149	-9.47629	-0.0706566	4.44056	-1.67085	-1.50942	-11.1053	-0.957269	-3.58795	3.83962	-7.05472	1.66102	1.31866
594	6.36111	0.234613	-5.09877	-0.535498	-2.11444	3.11835	-4.85127	-5.12081	6.95527	-5.52722	-2.10905	-8.83864	2.71431	-2.60565	-11.1526	1.38213	-9.43134	1.22904	-9.58313	-7.69076	-1.21418	2.55142	-1.54509	-0.786801	4.35303	-9.41979	-8.05375	-9.01225	9.24046	-2.20085	-6.93398	-2.28881	3.89574	-7.8737	-3.21411	0.483964	4.34988	-8.86438	0.00575047	4.59595	1.33379	-1.63714	-11.1053	6.12465	-2.9279	4.44664	-8.01625	3.12518	1.11885
595	4.78282	0.34035	-5.1885	-0.215325	-0.780962	2.84544	-4.83872	-2.70032	6.93261	-4.81488	-1.89457	-8.97371	2.74113	-2.00816	-10.6347	1.31651	-8.82918	0.849131	-9.5533	-7.62676	-1.65964	2.14426	-1.46345	-0.630804	3.40624	-7.66577	-7.83305	-9.01892	9.35171	-2.14617	-4.64875	-1.49926	3.89498	-7.72559	-4.5326	0.406709	2.95655	-8.85835	0.126854	4.5688	-0.677699	-0.82924	-11.0331	6.1654	-3.63807	3.97908	-6.95388	4.75785	1.14292
596	5.02123	-0.574897	-4.96143	-0.58919	-1.77298	2.9067	-4.86981	-5.30724	6.84735	-3.9624	-2.89315	-8.91492	2.72038	-3.11275	-10.9895	1.7094	-8.55516	1.06619	-9.71236	-8.92242	-0.593891	-1.50799	-7.48528	-0.963203	4.27729	-8.02001	-8.10139	-9.01355	9.42893	-2.02351	-6.37148	-2.08877	3.89607	-9.92787	-3.19701	0.237541	4.33425	-8.81196	0.178042	5.7214	-1.76492	-1.72509	-11.1351	6.22408	-3.74412	4.48981	-7.00459	2.88519	1.2527
597	6.32841	0.380115	-5.23883	-0.146284	-1.67195	3.18339	-4.86483	-2.12594	6.95143	-3.1858	-3.69872	-8.77678	2.69735	-1.29141	-8.75792	1.66142	-9.14264	0.849696	-8.84974	-8.77694	-1.15865	2.34678	-7.9393	-0.660408	3.4123	-8.38138	-8.04407	-9.01152	9.35735	-2.142	-4.4431	-0.829761	3.89314	-8.97586	-4.27356	0.10465	2.31439	-8.73339	0.11673	5.24701	-2.38415	-0.86296	-11.131	6.16079	3.01393	4.49842	-7.95748	0.12694	1.33723
598	3.81613	-0.0669921	-4.95829	-0.711825	-1.58706	-6.58789	-4.86502	-0.11911	6.91386	-5.61952	-1.69527	-8.84746	2.78579	-9.40539	-11.1918	1.43127	-9.62129	1.1207	-8.96365	-7.95794	-1.32247	-2.40407	-7.96231	-0.80677	4.13204	-7.75609	-7.32732	-9.00858	9.23793	-1.57978	-4.84311	-1.28709	1.69717	-7.84454	-2.98754	0.223339	4.3168	-9.36562	-0.482854	5.70384	0.0259559	-0.96359	-11.1311	6.11912	3.05696	4.36853	-7.06806	6.2351	1.33291
599	5.24013	-0.878228	-4.91173	0.195211	-0.754011	-6.466	-4.86763	-6.19324	6.90154	-4.19995	-3.69217	-8.98403	2.65865	-8.11772	-10.3786	2.06822	-9.68725	1.0929	-9.70194	-7.79051	-0.918618	-2.14755	-7.70484	-0.8725	4.26798	-7.42922	-7.38096	-9.01647	9.38709	-1.95884	-5.25984	-2.12517	2.67366	-7.0537	-3.52763	0.430629	0.885697	-9.56213	-0.353359	5.07985	2.12495	-1.75851	-11.1233	6.13929	3.08345	4.13372	-7.01784	7.12334	1.33149
600	5.12185	0.41429	-4.97402	-0.827471	-2.17817	-5.35192	-4.83401	-0.910576	-5.36108	-4.91883	-2.46062	-8.80193	2.56851	-7.83131	-10.8414	2.21874	-8.59868	1.13913	-9.65662	-7.66793	-1.70781	1.99413	-7.53305	-0.812312	3.39786	-7.88511	-7.49087	-9.00952	9.30138	-1.85567	-5.97167	-0.629737	1.81403	-7.94478	-3.07925	0.0931185	1.96871	-9.54705	-0.161179	5.63122	-1.79871	-3.26739	-11.1252	6.24014	3.11989	4.26077	1.10377	7.23363	1.32992
601	6.34043	0.221358	-5.22439	0.242817	-1.02559	-6.51082	-4.83187	0.0181527	-6.46392	-9.43182	-1.57152	-8.91071	2.6793	-7.89921	-8.52841	1.80622	-10.1974	0.841717	-8.89258	-8.65927	-1.41385	1.77824	-7.73292	-0.33882	4.51113	-8.09471	-7.61812	-9.00515	9.44255	-1.75738	-4.37629	-2.28565	2.53151	-7.01191	-4.40968	0.235946	0.88576	-8.77334	-0.232351	5.38342	3.31728	-3.37763	-11.1301	4.52109	3.15387	4.47978	1.6864	7.25565	1.32325
602	3.95295	-0.609257	-4.9845	-0.10513	-2.22656	-6.40767	-4.83417	-2.42633	-4.94131	-8.44633	-3.65114	-8.83967	2.78808	-8.97665	-11.1695	-0.56805	-8.60642	0.913714	-9.0628	-7.61717	-0.26513	-1.67385	-7.50038	-0.459283	4.92024	-9.34121	-7.44861	-9.01886	9.31768	-1.76964	-7.36812	-1.06067	1.59138	-8.04272	-2.9266	7.65031	1.07694	-9.3137	-0.261583	5.30093	-2.17349	-3.87162	-11.1227	5.03487	2.80716	3.99014	1.45192	7.09793	1.32437
603	6.25482	-0.652853	-5.46427	-3.58227	-2.24308	-4.07507	-4.86457	-3.16582	-3.14337	-7.74334	-2.28806	-8.92903	2.57483	-7.58129	0.172744	1.91113	-9.31869	1.02938	-8.8964	-8.65929	-0.400742	-2.8596	-7.71866	-0.85027	4.82676	-7.61334	-7.75564	-9.01684	9.29656	-1.94786	-6.75948	-2.06278	2.62013	-6.95936	-3.41751	9.41871	0.985063	-8.9878	-0.309926	5.52017	1.84706	-3.18814	-11.1269	5.05235	3.57667	4.4306	-0.0468592	7.27611	1.32283
604	5.38712	-0.389761	-4.91217	-3.4499	-1.3277	-4.55019	-2.47487	-2.52729	-6.06975	-8.1955	-1.50626	-8.78158	2.81537	-7.78181	-0.187305	-0.424773	-9.76419	0.974557	-9.19218	-8.63903	-1.27092	1.52811	-7.514	-0.909752	5.29271	-7.82206	-7.47586	-9.01602	9.24611	-2.19601	-4.49935	-2.24471	2.29051	-8.01495	-4.1173	9.58429	1.66601	-9.23027	-0.270522	5.10867	-1.71976	-4.29734	-11.1306	4.88718	3.54619	3.84423	0.295876	7.2381	1.32471
605	-0.76336	-0.519	-4.92307	-4.2106	-2.16821	-6.53343	-2.13008	-2.49259	-7.2478	-7.44073	-2.33582	-7.96474	2.63119	-8.44213	0.298082	-0.214665	-9.05432	1.02843	-9.70195	-9.44047	-1.69346	-2.64626	-7.90033	-0.64003	5.09514	-7.49913	-7.34381	-9.00956	9.23171	-2.01807	-4.69139	-0.851367	1.41637	-7.36584	-3.32651	7.18887	1.13591	-9.37951	-0.335702	5.2447	3.59867	-3.64157	-11.1329	5.03841	2.84877	4.34583	0.216	7.23132	1.32035
606	-0.731915	-0.56819	-5.76738	-3.67473	-1.29835	-6.73717	-2.51408	-2.5315	-2.52972	-9.1505	-3.64947	-4.56737	2.76526	-9.7806	-0.405716	-0.309881	-10.0737	0.872838	-9.62144	-9.67907	-0.981344	1.26249	-7.66521	-0.74801	4.54213	-7.93534	-7.6082	-5.20233	9.28937	-2.09834	-4.91516	-0.404017	2.41725	-7.46537	-3.1942	7.88921	1.23811	-9.56441	-0.154044	4.581	-1.97231	-4.30435	-11.1252	4.69397	2.88804	3.45899	1.15405	7.48345	0.323423
607	-0.929665	-0.66047	-4.96513	-3.7084	-1.17196	-6.4408	-2.41175	-2.481	-8.08695	-7.94705	-2.35749	-2.69447	2.59286	-9.1863	0.449215	-0.134609	-8.56202	1.04794	-9.69828	-8.97177	-1.44914	0.981737	-7.87798	-0.945534	4.8543	-7.65521	-7.29087	-5.14073	9.30803	-2.10773	-5.38459	-2.03657	1.4946	-7.3355	-3.57144	7.61946	1.79131	-8.97274	-0.00531078	5.38892	0.57681	-4.33385	-11.1249	5.22744	2.97291	3.51297	1.65695	7.0251	0.296524
608	-0.514273	-0.549118	-4.92089	-4.26436	-0.877397	-5.63181	-2.28897	-2.4804	-3.84636	-8.94611	-1.48516	-5.72317	2.73024	-7.78294	-0.152462	-0.00466338	-10.1954	0.848995	-8.89529	-8.18773	-0.811271	-3.62498	-7.6444	-0.972087	4.58378	-7.84874	-7.75909	-7.39656	9.30479	-8.3646	-5.80201	-0.167059	1.30619	-7.18135	-3.92896	8.44252	1.60896	-9.40762	0.316237	4.4634	2.72907	-3.30466	-11.1253	5.20642	3.59812	4.47614	-0.147201	7.24908	0.533152
609	-0.958415	0.431681	-5.27656	-3.27492	-2.19115	-6.78959	-2.27407	-2.53357	-2.24625	-9.31573	-3.70692	-8.23267	2.62253	-8.83042	0.588761	0.15116	-8.82169	1.08036	-9.71651	-9.2088	-1.73831	-3.09937	-7.91173	-0.379479	5.03704	-7.82353	-7.32093	-5.14704	9.25842	-8.3706	-7.30212	-2.08321	2.03669	-7.71205	-3.94676	8.24586	1.59626	-8.91158	0.243239	5.55304	-1.52878	-3.76611	-11.126	5.02123	2.92737	3.59843	0.912233	7.30645	0.38117
610	-0.783644	-0.523558	-4.91488	-3.56431	-1.47144	-6.55958	-2.44279	-2.53687	-5.17121	-7.27319	-2.26257	-4.4077	2.62867	-7.42785	-0.0961082	0.249231	-7.41672	1.20958	-9.69307	-8.4212	-0.861211	0.698119	-7.69186	-0.354711	5.27216	-9.0579	-7.37243	-5.14309	9.35244	-8.40861	-4.32298	-0.652582	1.35575	-7.20104	-3.20796	8.32078	1.28354	-8.97671	0.170813	4.72004	0.321659	-3.08742	-11.1215	5.18533	2.77308	4.42275	1.19134	7.07078	0.816952
611	-0.974109	-0.233583	-4.9601	-3.6025	-2.11709	-4.30548	-2.07641	-2.48867	-2.26716	-7.57057	-2.28818	-2.41725	2.80296	-7.76977	0.695612	0.336167	-7.44114	1.04299	-9.70143	-5.26022	-1.35625	0.449224	-7.92513	-0.801133	4.44772	-7.65973	-7.78651	-5.15146	9.2408	-8.35442	-4.60945	0.0155392	2.15957	-7.54982	-3.77427	7.69311	2.37134	-8.85992	0.0937911	5.67113	2.42376	-4.114	-11.1237	5.0783	3.36796	3.71254	1.27035	7.36581	0.695877
612	-0.626176	-0.74062	-5.64682	-3.54462	-1.58522	-4.80641	-2.38455	-2.54088	-3.36725	-8.70153	-1.48306	-5.95142	2.63876	-8.22792	-0.149033	0.339025	-7.43078	0.964711	-8.50069	-5.38861	-0.785602	-3.36615	-7.68158	-0.796184	5.11141	-7.65088	-8.09414	-7.0351	9.40112	-8.14953	-7.19593	0.0499398	1.83499	-7.09903	-3.14363	7.62284	1.65249	-9.0044	-0.0543311	4.89761	3.02554	-3.49543	-11.1315	5.1285	2.69597	3.50805	0.716487	7.04781	0.876002
613	-0.766532	0.0932771	-4.85769	-4.20342	-1.01268	-6.46452	-2.25417	-2.49237	-2.72239	-9.54741	-3.81011	-4.85056	2.65458	-8.68108	0.766949	0.343538	-7.44163	1.14619	-9.35732	-4.89499	-0.316346	0.0298307	-7.85221	-0.535725	5.1704	-7.83345	-8.10218	-5.15626	9.2606	-8.35445	-5.01054	0.0962505	2.64884	-7.01668	-3.71842	7.25133	1.35651	-9.34694	-0.160405	-8.70249	-1.0514	-3.05948	-11.1232	5.15133	3.4029	3.70458	0.140202	7.3308	0.975819
614	-0.900631	0.420037	-5.48282	-3.5068	6.99454	-5.91201	-2.35976	-2.54933	-4.12009	-7.34702	-3.95378	-8.47968	-9.60898	-9.1459	-0.134838	0.411908	-7.42404	1.00311	-8.88397	-5.57468	4.18618	0.241814	-7.62771	-0.666065	4.81093	-8.61494	-7.93659	-5.77259	9.36045	-8.41423	-6.57284	0.209936	1.27039	-7.79686	-3.20301	9.71377	2.17641	-8.95784	-0.199269	-8.32094	-1.66587	-3.54534	0.121178	5.77282	2.73339	3.59505	1.54109	7.22341	0.910965
615	-0.77761	-0.834969	-4.90773	-3.33701	7.60339	-6.40302	-2.35541	-2.49048	-5.64924	-5.89904	-1.48291	-6.19594	-10.7413	-7.8226	0.671584	-3.79018	-7.43572	1.03369	-8.65838	-5.59591	4.13462	-4.12263	-7.82547	-0.483907	4.69237	-7.74492	-7.61952	-7.24056	9.34058	-8.40577	-5.50614	-0.0896252	2.68143	-6.8875	-3.20073	8.14457	1.32685	-8.90402	3.65636	-8.22633	-4.38138	-4.21851	-0.934101	6.13112	3.4885	4.17653	1.45368	7.20939	1.04774
616	-0.833743	-0.629779	-4.75953	-3.62965	8.15511	-3.66586	-2.47671	-2.5473	-6.70969	-6.08125	-2.4376	-3.27057	-8.63567	-7.52186	-0.150704	-3.2393	-7.43771	1.05194	-9.5061	-5.36527	4.18343	-0.458317	-7.63395	-0.94685	5.26132	-7.90412	-7.90256	-5.16873	9.32228	-8.36841	-4.74383	-0.0606875	1.9253	-6.74468	-4.42007	7.47095	1.70116	-8.82756	3.71345	-7.85998	-3.9442	-3.99786	0.29337	5.98459	3.44664	3.45949	0.0895005	7.3939	1.117
617	-0.989832	-0.608658	-4.77242	-3.37644	7.03101	-6.49058	-2.41352	-2.4832	-6.24354	-7.63783	-2.41901	-8.6665	-10.3087	-7.72831	0.773046	-3.52131	-7.43491	0.924099	-9.70236	-5.31215	4.17722	-0.210669	-7.60274	-1.0015	4.99038	-7.99474	-7.46104	-5.13913	9.32021	-8.32173	-4.27712	-0.0211664	1.25071	-7.11409	-3.37096	7.36848	1.21507	-9.51446	4.42869	-8.04725	-4.17857	-3.41826	-1.11551	4.57794	3.51427	4.29669	0.030142	7.00945	1.10037
618	-0.397332	-5.23567	-5.2937	-3.8203	8.13153	-6.55306	-2.14542	-2.55285	-8.33054	-6.23927	-2.38299	-4.71222	-8.49183	-7.86879	-0.138914	-3.41509	-7.40345	1.05293	-9.65008	-5.58121	4.13833	-3.86834	-7.87392	-0.432942	4.4733	-8.82551	-8.02035	-5.14447	9.39841	-8.07208	-5.13262	0.0345557	2.48204	-7.66399	-3.05936	9.01777	1.71672	-8.91621	3.76351	-7.72264	-4.34992	-3.86349	-0.819699	4.54923	2.65611	3.44279	1.67297	7.00016	6.51044
619	-0.887526	-5.8516	-5.7783	-3.30633	6.96369	-6.40913	-2.38158	-2.47687	-3.60262	-6.00012	-10.1738	-6.46985	-8.73695	-9.53676	-0.179224	-3.1532	-7.42091	-4.78603	-9.71311	-5.53358	4.12185	-1.10788	-7.61657	-0.658201	4.88949	-7.47621	-6.3584	-5.19992	9.38746	-8.36185	-4.55901	0.424027	1.24653	-7.57531	-3.21118	8.80659	1.07943	-8.90913	3.81078	-8.42806	-3.96863	-4.09043	0.464918	4.48021	2.53094	4.39126	1.36772	7.24109	6.60799
620	-0.842493	-5.19164	-5.85229	-3.47834	7.71913	-6.58702	-2.57146	-2.55364	-2.28771	-5.82275	-9.82635	-2.99671	-10.3091	-7.93996	-0.211718	-4.83759	-7.42576	-4.36959	-8.76534	-5.52909	4.12461	-0.714035	-7.77175	-0.84702	4.74394	-9.51568	-6.32821	-5.61579	9.30582	-8.35329	-7.08332	0.464946	1.71365	-7.01803	-4.16674	7.28629	1.43603	-9.48677	4.38732	-8.864	-4.12683	-3.30649	-0.959921	5.12409	3.24252	4.30764	1.2884	7.42442	6.48243
621	3.76285	-6.09409	-5.13947	-3.4431	7.65485	-6.45077	-2.37282	-2.46998	-5.90745	-6.60376	-9.67766	-8.85798	-9.91052	-8.33418	-0.243332	-3.00368	-7.41372	-5.17873	-8.85945	-5.08375	4.19527	-0.932634	-7.75162	-0.694116	5.16356	-9.52353	-6.42961	-6.5558	9.37319	-8.40462	-5.6412	0.562433	2.58162	-6.92398	-7.02667	9.81486	0.948141	-8.83247	3.54581	-8.22579	-3.99248	-4.18179	0.705301	4.4106	2.61289	4.31189	1.58422	7.1962	6.53209
622	4.19153	-5.14969	-4.96695	-3.64861	7.07311	-5.07765	-2.43199	-2.55143	-5.778	-5.88376	-9.92547	-5.32276	-10.1508	-8.54984	0.587674	-3.54389	-7.40957	-5.75761	-9.63528	-5.23169	4.12834	-1.35243	-7.58646	4.84043	4.51351	-9.50424	-6.38514	-5.22361	9.285	-8.40349	-6.162	0.705235	1.26619	-6.9043	-7.55557	7.46124	1.586	0.576383	4.41039	-8.29833	-4.40921	-3.71481	-1.16007	5.52418	2.57497	4.30739	0.403792	6.97842	6.38173
623	4.21582	-5.9688	-5.09005	-3.93062	6.9393	-6.62565	-2.38359	-2.54908	-7.81811	-6.12771	-9.70286	-4.01886	-8.4927	-7.85527	-1.23391	-3.89467	-7.38376	-4.40121	-9.71379	-5.47732	4.18841	-1.22353	-7.55663	4.61356	5.30228	-9.14573	-6.41001	-5.14296	-0.173285	-8.3612	-4.79101	0.363932	1.76162	-8.02822	-8.09799	8.03805	0.846013	2.77849	4.37326	-8.00396	-4.20326	-3.2383	-1.3915	5.27369	3.20098	4.30389	1.6102	7.44952	6.43938
624	2.84939	-5.16665	-5.75719	-3.8605	8.11632	-6.19033	-2.54505	-2.51931	-4.395	-6.43762	-9.67328	-6.76174	-9.45075	-8.01913	-0.242486	-5.31042	-7.41749	-4.81108	-9.70403	-5.22093	4.148	-10.8182	-7.81726	4.4179	4.9867	-9.49684	-6.30359	-6.80736	-0.189931	-8.36696	-7.40365	0.477015	1.31252	-6.79613	-6.77642	9.22441	0.803914	1.01598	3.61092	-7.96946	-4.01087	-3.96295	-1.18048	4.42325	2.49417	4.30185	-8.66218	6.95224	6.38572
625	3.02255	-6.12907	-4.98099	-3.50024	8.24662	-3.86095	-2.2915	-2.54908	-4.67567	-5.88229	-10.3142	-9.10191	-10.6634	-9.28238	0.750923	-3.31388	-7.40039	-5.34419	-8.88761	-5.43549	4.1934	-10.2659	-7.57166	4.59662	4.63429	-9.49697	-6.54262	-5.93056	-0.148528	-8.39164	-11.6711	0.451386	2.2154	-6.94525	-7.28082	7.59243	1.07904	3.08212	3.97875	-7.69881	-4.18934	-4.2109	-0.164791	7.18679	3.32302	4.29972	-8.2819	7.18465	6.24305
626	4.18377	-5.28802	-4.9935	-4.44862	7.1313	-6.57588	-2.22407	-2.5214	-2.36222	-6.07486	-9.74465	-4.99653	-10.2288	-7.65173	-1.04124	-3.45253	-7.41721	-5.45798	-9.70843	-5.60891	4.19072	-9.85757	-7.79406	4.36334	4.45348	-9.50832	-6.52381	-5.32084	-0.337545	-7.98284	-11.6687	1.92241	2.35447	-7.98227	-7.82009	7.20365	0.954927	2.49372	4.01438	-8.40687	-3.82272	-3.22211	-1.34863	8.07654	3.29667	4.29904	-8.14997	7.46325	6.11626
627	3.85914	-6.08859	-4.88868	-3.66601	7.7872	-6.39764	-2.23838	-2.52719	-2.92459	-6.84247	-10.0469	-7.37074	-9.27721	-9.64958	-0.207411	-3.20469	-7.28676	-5.62984	7.52177	-6.00473	4.14131	-10.2266	-8.19238	4.86377	5.30424	-9.50054	-6.50317	-6.10425	-0.545832	-8.35203	-11.669	1.77479	1.93846	-7.90475	-9.48978	8.61219	0.828328	2.35215	4.04831	-8.12351	-4.47953	-3.57351	-0.147977	8.16002	3.34518	4.29486	-9.07261	7.1459	6.04256
628	4.12849	-5.32527	-5.85739	-4.08596	6.91667	-6.7044	-2.4944	-2.5223	-5.51947	-5.94457	-10.3649	-3.54031	-10.091	-7.78427	-1.16549	-2.98265	-7.36153	-5.2843	7.49606	-6.21395	4.14434	-10.6934	-8.21269	4.5634	4.69171	-9.5159	-6.56798	-5.13988	-0.553811	-8.37344	-11.6045	-0.240802	2.07346	-6.74001	-9.32911	4.30495	1.25166	1.37189	4.09132	-9.19564	-4.46082	-4.22401	-1.24584	7.91953	4.84842	4.29354	-8.7598	7.47645	5.98766
629	4.18233	-6.00611	-5.63648	-3.33112	8.20889	-7.50351	-2.46303	-2.52174	-6.97402	-7.86842	0.904596	-5.51448	-8.86448	2.77066	-0.13866	-4.56996	-7.37244	-4.48822	7.42623	-6.59724	4.14344	-9.9519	-8.09488	4.33836	5.31144	-9.51905	-6.55573	-5.46772	-0.354494	-8.353	-11.6746	1.66847	3.58935	-0.410296	-9.49639	3.1339	0.923749	0.529978	3.86521	-8.3996	-4.03717	-3.46194	-1.03607	8.14041	5.02643	4.2675	-8.34188	7.16726	5.9399
630	4.21191	-5.85756	-5.01315	-3.48132	7.26664	-9.14366	-2.07558	-2.54857	-7.53517	-6.17261	0.179904	-9.3837	-8.50501	2.80997	-0.616898	-4.30023	-7.31031	-4.80719	7.54393	-6.27559	4.1461	-10.1602	-8.16183	4.51109	4.5855	-9.49731	-6.4615	-6.31635	-0.287686	-8.38195	-11.6789	-0.218187	3.59536	-1.46162	-9.4163	3.96706	4.75036	3.13813	3.91026	-8.07272	-4.25663	-3.23131	-1.1517	7.93553	5.78171	4.27045	-8.24555	-1.78674	5.85087
631	4.16169	-5.34427	-5.0856	-3.41519	6.88927	-6.84728	-2.52661	-2.52759	-4.19337	-7.11805	-2.51707	-4.22386	-9.49647	2.73185	-0.0697364	-3.07866	-7.35107	-5.45147	7.65964	-6.22276	4.19241	-10.7533	8.56554	4.90196	4.95277	-9.49899	-6.44487	-4.70017	-0.535384	-8.36354	-11.6805	1.51716	3.5864	-0.24969	-9.47809	2.8576	4.7414	2.55747	3.94747	-7.99021	-3.84715	-0.0281828	-0.0609226	7.06502	5.53167	4.31724	-9.11781	0.795481	5.89141
632	4.17974	-5.33755	-5.09775	-4.38462	7.84867	-7.1229	-2.22132	-2.52329	-4.21259	-5.97206	0.620443	-7.0657	-8.99999	2.8621	0.0628215	-3.5848	-7.35179	-4.62597	7.65027	-5.99101	4.13825	-10.9621	8.58973	4.3072	-6.77315	-9.50522	-6.48942	-5.75755	-0.53813	-8.34385	-11.6794	1.30291	3.5911	-1.53616	-9.49952	2.81677	4.8391	0.915853	4.24668	-7.7649	-4.22552	-0.854995	-1.3537	6.96558	5.51994	4.30935	-7.91138	-1.72236	5.86092
633	3.99501	-5.35092	-5.44063	-3.3664	7.19648	-7.7287	-2.07879	-2.51547	-5.38005	-5.85019	-3.444	-5.1485	-10.0119	2.77866	-0.833515	-3.34951	-7.34091	-4.79844	7.45688	-6.66786	4.14075	-9.91047	8.46327	4.53297	-7.29895	-9.17306	-6.47594	-4.68872	-0.306374	-8.34468	-11.6646	1.07178	3.59581	-1.58706	-9.42208	4.75711	5.03391	0.471451	4.22219	-8.41708	-4.44164	-0.879821	0.769143	8.15393	4.87455	4.31622	-8.98184	1.04438	5.92406
634	4.22612	-5.69894	-5.18215	-1.28202	8.26286	-9.20335	-2.44031	-2.50382	-4.62007	-5.96091	-2.14053	-3.78602	-10.7043	2.85578	-10.2647	-3.47505	-7.38464	-5.53666	7.44709	-6.34647	4.1417	-10.3484	8.57626	4.95159	-6.9062	-9.49431	-6.69136	-5.87856	-0.249104	-7.82572	-11.6763	0.867036	3.58887	-0.103601	-9.48933	3.82968	4.92365	0.843645	4.19828	-7.91605	-4.45295	-0.860607	-0.125112	7.80794	5.25471	4.27763	-8.09589	-1.8221	6.26214
635	2.17415	-5.36647	-4.77018	-1.17969	7.34589	-7.9541	-6.4042	-3.00055	-5.68998	-6.59481	-3.03889	-7.67647	-10.3486	2.86943	-10.5251	-4.04083	-7.33138	-4.52778	7.41505	-6.17007	4.15595	-10.8714	8.58503	4.74926	-7.86919	-9.52198	-6.73495	-4.61866	-0.265439	-8.40301	-11.6771	-0.141297	3.58649	0.00941054	-9.44027	2.77245	4.97255	1.12834	4.18286	-8.53032	-4.0603	-0.904965	-0.14093	8.37138	4.91868	4.2883	-8.54704	-1.47122	6.51851
636	3.17214	-5.34446	-5.13605	-0.919601	7.96369	-9.19418	-5.97986	-1.96171	-4.56582	-6.21057	0.786393	7.60905	-8.54514	2.7924	-10.2807	-5.05686	-7.32144	-4.91527	7.50813	-5.9817	4.153	-9.97006	8.40118	4.68749	-7.27769	-9.51566	-6.7633	-4.63019	-0.212985	-8.24169	-11.6801	-0.155368	3.59233	-1.08756	-9.37058	4.09352	4.71631	2.95264	4.18227	-9.00991	-3.87308	-0.889544	0.734534	7.33438	5.5378	4.28904	-7.95147	-1.61401	6.14342
637	4.17976	-5.31449	-5.25668	-1.29813	7.41586	-5.64687	-5.54443	-1.14113	-4.38062	-8.11978	-1.44641	7.44933	-9.88879	2.81337	-11.2427	-3.62554	-7.22602	-4.99315	7.47682	-6.11632	4.1147	-10.3064	8.57766	4.27878	-6.99678	-9.49154	-6.78534	-5.77875	-0.227468	-8.37388	-11.6642	-0.122316	3.58718	-0.950971	-9.50096	2.8163	4.72982	2.22302	4.16731	-8.55379	-4.09492	-0.528568	-0.149806	8.27758	5.16188	4.27644	-9.10671	-2.3044	6.44938
638	2.52804	-5.57702	-5.02417	-1.19324	8.27915	-7.40864	-6.38774	-4.76095	-4.69489	-5.92487	-2.33204	7.67323	-9.69434	2.75056	-10.6292	-3.38249	-7.31719	-4.79907	7.71382	-6.13338	4.16324	-10.8543	8.58114	4.92758	-7.03894	-9.50962	-6.80896	-5.89544	-0.484133	-8.41196	-11.6732	-0.220749	3.59465	-0.933022	-9.53561	4.33275	4.81296	2.05596	4.13096	-8.15679	-4.5303	-0.61849	-0.463677	7.7384	5.51546	4.27175	-9.1487	1.69279	6.033
639	3.94191	-5.44013	-5.08583	-1.23882	8.01649	-9.05157	-5.63647	-0.591665	-5.90092	-6.32464	-0.852947	7.40462	-10.5938	2.86801	-10.2346	-3.27185	-7.20552	-5.63224	7.4377	-6.01228	4.17168	-10.9254	8.56741	4.49336	-8.37016	-9.49815	-6.58194	-5.08606	-0.447065	5.31392	-11.681	-0.234686	3.58738	-0.775523	-9.51727	4.91228	5.10825	0.80132	4.35847	-7.71566	-4.32356	-0.466738	-0.653646	6.96529	5.34304	4.27266	-8.11275	-1.28372	6.51117
640	3.34854	-5.30678	-5.00056	-1.02922	7.47847	-8.18191	-6.3219	-3.88388	-3.95165	-7.39015	-3.63221	7.38561	-8.57436	2.8422	-11.2407	-3.50143	-7.25503	-4.39357	7.58567	-6.70449	4.16188	-10.8442	8.58069	4.98133	-7.28855	-9.49743	-6.58963	-4.96497	-0.499449	7.06376	-11.6783	-0.204145	3.59208	-1.35692	-9.48847	4.39862	4.64064	2.9943	4.34651	-7.97222	-4.51012	-0.724261	0.58083	7.66723	5.42495	4.27286	-9.14988	-1.8174	6.48531
641	4.22972	-5.46493	-4.81267	-1.14852	7.91771	-5.93993	-6.063	-2.6824	-4.02608	-6.04489	-0.404126	7.62083	-9.13277	2.93898	-10.2299	-3.0222	-10.2487	-5.12737	7.63319	-6.28781	4.11687	-9.99509	8.30786	4.76768	-7.21377	-9.35114	-6.60199	-5.68969	-0.462815	7.26011	-11.6695	-0.176036	3.59343	-0.591931	-9.51388	3.28626	5.23601	2.84396	4.32773	-8.46857	-3.9102	-0.814725	-0.149867	8.02214	5.02405	4.28027	-8.19694	-1.87685	6.34711
642	2.35605	-5.34013	-9.16339	-0.990374	8.07898	-7.99401	-6.38622	-3.1048	-4.34503	-5.86073	-0.70502	7.4239	-10.4051	2.74155	-10.7653	-3.68956	-9.89696	-4.88557	7.47196	-6.31415	4.1731	-10.0285	8.5819	4.71524	-7.58067	-9.50301	-6.61574	-5.91642	-0.427621	5.67709	-11.6738	-8.52233	3.58818	-1.23119	-9.484	2.75315	4.46464	2.31712	4.30708	-8.38128	-4.52024	-1.35463	0.82334	7.69954	5.733	4.28694	-8.62495	1.28557	6.4056
643	3.50602	-5.32972	-9.1553	-1.07676	8.30707	-6.50293	-5.77172	-0.980269	-4.63573	-5.97986	-1.68592	7.60523	-10.466	2.8685	-11.2425	-5.77944	-9.67137	-5.02908	7.71381	-6.4435	4.17109	-10.378	8.59548	4.24445	-7.09157	-9.50304	-6.64945	-5.80687	-0.472783	4.36585	-11.6787	-10.2266	3.59343	-0.0135198	-9.524	2.63274	5.4003	0.774277	4.28891	-7.80249	-4.293	-0.402628	-0.277907	8.10572	4.9185	4.28456	-8.96927	1.49746	6.29226
644	4.03077	-5.38374	-9.16439	-0.93257	7.54657	-8.42131	-6.30117	-4.64893	-5.46041	-6.54554	-0.0203102	7.33699	-9.75159	2.86261	-10.9121	-5.91445	-6.90222	-4.44599	7.55391	-6.09716	4.11705	-10.4245	8.56671	4.46505	-7.02853	-9.43402	-6.88516	-4.80366	-0.438447	8.55559	-11.6661	-9.9682	3.58837	-0.272149	-9.48955	2.87051	4.79239	2.66778	4.273	7.57108	-4.15747	-1.45484	0.807123	7.92077	4.9834	4.28765	-8.06792	-1.82879	6.33151
645	4.23453	-5.71466	-9.16319	-1.22207	0.639778	-7.70367	-5.70537	-4.05821	-4.65506	-6.39433	-2.68217	7.50495	-4.05672	2.87713	-10.2781	-5.67559	-8.87079	-4.86669	7.55736	-6.09853	4.91343	-10.8742	8.57424	4.66791	-8.59239	-9.52123	-6.87029	-4.84542	-0.478519	4.4967	-11.6822	-6.23311	3.58624	-0.129924	-9.48246	2.89413	5.5612	3.14011	4.25842	7.70733	-4.48186	-0.292156	2.04317	7.50867	5.42073	4.28908	-8.37871	-0.824415	6.3594
646	4.18763	-5.45169	-9.16245	-0.946058	-1.74141	-8.27359	-6.41946	-1.722	-4.45816	4.02378	0.700063	7.42135	-1.2883	3.01233	-11.2456	-5.87635	-10.0043	-5.71141	7.5759	-6.20099	4.67709	-10.0628	8.57379	4.7943	-6.87513	-9.45408	-6.82878	-5.61192	-0.516234	5.1438	-11.6718	-8.29372	3.58693	-1.39254	-9.50701	2.78766	4.54752	0.726393	3.95513	7.65902	5.90076	-1.42385	1.92275	6.95396	5.52836	4.27572	-8.31994	-0.563096	6.58736
647	4.0774	-5.24511	-9.16222	-1.04152	0.261055	-6.22651	-5.90781	-2.87532	-5.97429	3.29894	0.839589	7.54232	-2.85361	2.76269	-11.2727	-5.62896	-5.30571	-5.25774	7.54855	-6.56827	4.92986	-10.6344	8.59177	4.19119	-7.10289	-9.49093	-6.81908	-5.79395	-0.404276	6.67079	-11.6753	-9.6555	3.59379	-0.766141	-9.51678	2.82654	5.70103	1.22482	3.53166	7.56188	6.31207	-0.339286	1.84863	8.2947	4.94183	4.28777	-8.16778	-1.90136	6.49359
648	4.2508	-5.58682	-9.1584	-0.979983	-1.60569	-6.77285	-6.45756	-0.463086	-3.96583	4.89215	0.360567	7.31102	-5.30095	2.88217	-11.0494	-5.90886	-7.59898	-5.72825	7.39516	-6.36302	4.81145	-10.0882	8.58616	4.43633	-6.81629	-9.24002	-6.84079	-5.93638	-0.528036	5.48706	-11.6013	-6.40002	3.58918	-1.26565	-9.47378	3.45982	4.40442	0.611782	3.92703	7.74419	5.93906	-1.49414	1.82993	6.97541	5.56816	4.27932	-9.14134	1.84698	6.62687
649	3.65815	5.5787	-9.16531	-1.07175	0.798779	-8.65731	-5.38117	-0.872682	-5.8875	3.21798	-3.23813	7.58729	-6.64626	2.91061	-10.2112	6.12323	-10.2467	-5.02825	7.49925	-6.06845	4.68983	-10.8827	8.57635	4.39274	-8.12514	-9.4961	-6.86122	-5.71661	-0.420824	4.23158	-11.6745	-9.49066	3.5886	-0.598916	-9.50829	4.20256	5.77089	3.08398	3.56591	7.63392	6.2994	-0.233031	2.39912	7.81557	5.82213	4.28943	-8.15898	-1.06882	-1.34369
650	4.13382	5.55301	-9.16412	-1.1766	0.0890353	-8.54424	-5.69746	-3.28295	-3.99621	3.93051	-1.02234	7.61546	-2.59829	2.87707	-11.2421	6.18441	-9.12828	-0.887093	7.67078	-6.23354	4.89137	-10.8988	8.57655	4.63903	-2.17409	-9.48972	6.79427	-5.3179	-0.372859	6.86989	-11.6691	-8.03861	3.59143	-1.1143	-9.47916	4.49483	4.4034	1.79115	4.23167	7.56638	5.88658	-0.257841	2.29197	8.09722	5.51389	4.28368	-7.91966	-1.94807	-1.27878
651	2.68002	4.79623	-9.16652	-1.04158	0.697623	-8.84788	-6.02505	-4.2238	-4.91073	4.97652	-0.223049	7.74423	-0.199039	2.77739	-10.2898	6.15971	-6.16577	-0.751953	7.71959	-6.65916	4.83181	-10.8611	8.57438	4.82064	-3.47252	-5.37984	6.77992	-5.8425	-0.507177	7.62642	-8.74795	-10.3256	3.5886	0.0794741	-9.52419	4.32006	5.78399	1.55543	3.90305	7.62017	5.98429	-1.48432	2.1782	7.99299	5.47299	-6.65746	-8.46405	-0.29079	-1.11766
652	-1.26017	5.53516	-9.15693	-1.02471	-0.950315	-7.02739	-5.40677	-2.13795	-4.27673	5.37329	0.508168	7.50011	-6.91863	2.82531	-11.1539	6.12897	-7.37491	-0.0428512	7.46881	-6.22295	4.6479	-10.5402	8.57125	4.22357	-3.48738	-7.06408	6.77386	-5.66313	-0.512491	6.06985	-5.91116	-9.95744	3.58791	-1.61049	-9.41595	3.00005	4.41913	0.668167	3.59324	7.56417	5.86734	-0.927965	2.03372	8.13116	5.29109	-6.75211	-7.98671	1.96594	-1.20483
653	-0.819586	5.47045	-9.15732	-1.24849	-0.111936	-6.34349	-6.22868	-2.47788	-5.25729	4.23403	0.747237	7.70766	-3.8068	2.87855	-10.2315	6.30232	-8.36011	-0.714688	7.64781	-6.03695	4.96799	-10.1175	8.58128	1.47207	-5.92215	-6.86778	6.78058	-5.17272	-0.390666	4.99854	-7.98721	-6.58071	3.59337	-1.6032	-9.39776	2.87956	4.56727	-2.91104	3.619	7.56028	6.03525	-0.208297	2.06902	7.93521	5.15725	-6.76346	-8.83916	2.06996	-1.19713
654	-0.901151	3.04668	-9.16413	-0.924979	0.302611	-9.13133	-6.1511	-1.4881	-4.08244	3.50211	-0.563385	7.52677	-6.36124	2.77875	-11.2685	6.15942	-6.43737	-0.680698	7.5349	-6.20733	4.78188	-10.4772	8.56793	1.63626	-4.17546	-7.07545	6.77241	-5.81718	-8.15944	4.08528	-8.80471	-9.31214	3.58913	-0.430522	-9.50698	4.61639	5.74903	-3.20921	3.86572	7.6527	6.17914	-0.98541	1.81662	8.03242	5.67149	-6.67952	-8.90117	-2.00471	-1.29567
655	-1.71259	5.40348	-9.16307	-0.929007	0.601577	-8.79841	-5.4409	-0.269677	-5.98291	2.77945	-1.2217	7.67966	-0.427579	2.85341	-10.2643	6.04288	-10.1414	0.571994	7.40786	-6.70083	4.77544	-12.4022	8.57848	1.53973	-5.24625	-5.60921	6.79327	-5.96841	-8.50765	8.1229	-6.90927	-10.3649	3.5924	0.0982083	-9.4978	3.65628	4.434	-2.57248	4.19658	7.97392	5.87866	-0.181323	1.87939	8.03633	5.6136	-6.68176	8.77505	-0.00827626	-1.12081
656	-0.760561	5.56731	-9.15691	-0.914249	-1.74887	-7.27116	-6.36678	-0.768552	-4.52548	4.72159	-1.92103	7.51584	-1.48858	2.98843	-11.21	6.01846	-5.01559	0.235965	7.4842	-6.50114	4.79439	-8.63549	8.5791	1.56904	-2.64432	-6.70486	6.78461	-5.54302	-5.91333	7.79758	-4.80567	-9.94114	3.58484	-1.56391	-9.49783	5.06237	5.62286	-3.21482	3.50191	7.66722	6.08092	-1.04978	1.96403	-0.155208	5.06868	-6.75828	9.92822	-2.0865	-1.04135
657	-1.35873	4.61693	-9.15699	-0.913676	0.89279	-6.58734	-6.43746	-4.38245	-4.1101	4.13052	-2.85595	7.71801	-1.68866	2.84409	-10.2119	6.26224	-10.2184	0.83227	7.58556	-6.19468	4.65633	-10.0573	8.58681	1.4812	-1.29279	-7.00034	6.79206	-5.82561	-7.48806	6.47547	-5.08464	-7.78394	3.59063	0.0689863	-9.49598	2.76608	4.6386	-2.72407	3.88369	7.55876	6.24238	-0.14993	2.74208	0.0392341	5.50566	-6.65687	9.74621	2.19524	-1.41906
658	-0.999846	5.58438	-9.15662	-1.15011	-1.72217	-9.0105	-5.34095	-0.0715873	-3.94203	5.49663	-10.7019	7.45888	-4.78994	2.76862	-11.2517	6.46374	-9.76126	-1.22762	-7.4818	-4.74221	4.94582	-12.6338	8.53405	1.66469	-3.42835	-5.81728	6.77096	-5.73616	-6.70856	4.85717	-8.8099	-6.78739	3.59267	-1.49502	-9.45386	2.46215	5.44595	-2.84762	4.21084	7.56592	5.80258	-0.114071	2.39064	0.246448	5.51983	-6.74958	8.62066	0.539421	-0.964822
659	-1.26814	3.28314	-9.16646	-0.992803	-1.48654	-8.95691	-5.83582	-2.27834	-5.13377	3.38656	-9.20413	7.71356	-2.35785	2.87226	-10.4134	6.45441	-9.40554	-0.882614	-7.5919	-3.15695	4.66249	-12.0419	8.57183	1.67409	-3.79993	-7.4425	6.77912	-6.05232	-8.01325	3.93751	-4.60156	-10.0279	3.58916	-0.125253	-9.49361	-0.0330781	4.50677	-2.60276	3.85404	7.62626	5.97552	-1.14046	2.65422	0.17792	5.18767	-6.65243	9.09839	-2.18061	-0.907042
660	-1.08833	5.56067	-9.15788	-1.28404	0.338429	-10.0663	-6.40915	-3.48787	-5.63596	4.80932	-10.7036	7.51896	-3.57371	-4.87263	-11.2489	6.38406	-7.13476	-0.597504	-7.97711	-2.82045	4.98558	-9.79743	8.58704	1.47193	-1.92841	-7.22051	6.78979	-5.4305	-8.45727	7.96154	-8.56852	-9.12597	6.8278	-2.09973	-9.49453	-0.191562	5.24806	-3.05567	4.18022	7.92545	5.86818	-1.26869	2.30935	-0.321768	5.17346	-6.74842	9.13845	0.268923	-0.842263
661	-1.61284	5.30387	-9.15895	-1.11255	-1.15811	-9.60397	-5.89653	-3.69351	-5.28398	2.84868	-9.82528	7.49777	-5.04699	-4.65597	-10.2035	6.06099	-10.2373	0.371326	-9.02334	-3.92293	4.97172	-8.93323	8.57578	1.59288	-6.4673	-3.81781	6.77753	-5.85539	-5.85938	7.45043	-5.65579	-10.3875	6.00255	-2.21746	-9.44943	-0.0352463	2.29538	-3.23239	3.83089	7.83136	6.13576	-0.0740787	2.92073	0.451209	5.6398	-6.66029	8.60707	4.76399	-0.782301
662	-1.68047	4.42456	-9.15847	-1.2694	1.03149	-10.1806	-5.74574	-1.2927	-4.24167	3.04597	-10.6794	7.72633	-0.652765	-4.69219	-11.2656	6.15948	-8.099	0.416	-8.58631	-4.91411	4.74259	-8.79673	2.57804	1.67676	-2.89	-6.59826	6.77895	-6.34483	-7.34867	5.86576	-8.73717	-7.01181	6.90063	-2.37891	-9.54501	-0.0408232	2.73853	-3.41631	3.51427	7.61142	5.79138	-1.88072	2.82059	0.127976	5.20536	-6.66102	9.12294	4.72047	-0.731262
663	-1.15575	5.59221	-9.15732	-1.22364	0.233998	-9.68865	-6.24443	-0.676885	-3.34913	5.26149	-9.60696	7.40813	-6.09543	-4.6733	-10.3374	6.38786	-5.89356	-1.37786	-8.30624	-2.64452	4.86729	-11.2248	2.45852	1.41496	-3.53311	-6.04917	6.79318	-5.63066	-6.4696	4.74022	-7.70684	-9.99219	6.72009	-1.98525	-9.4986	-0.0370336	2.1189	-2.85217	3.73738	7.58556	5.84047	-1.94311	2.99164	0.145886	5.27887	-6.7501	9.00211	4.70819	-0.68094
664	-1.27793	5.54678	-9.15738	-1.14228	0.517156	-9.97493	-6.16229	-4.53601	-5.0296	3.7501	-10.288	7.60414	-0.871582	-4.85396	-11.1491	5.88968	-4.73402	0.705079	-8.05621	-3.09411	4.84873	-12.7475	2.72343	1.61082	-5.04612	-4.07797	6.77696	-7.6129	-8.48281	8.40946	-6.65014	-10.3689	5.82151	-2.23987	-2.16185	-0.0250566	1.2794	-3.3092	4.15559	7.59822	6.09357	-2.10871	2.87243	-0.281867	6.01126	-6.66468	9.86312	4.7475	-0.63414
665	-1.28578	5.58374	-9.16067	-6.11256	0.03192	-10.2343	-5.49004	-4.82876	-5.93394	4.5415	-10.6982	7.6265	-4.53614	-4.67145	-11.1215	5.90898	-9.62425	-0.915722	-7.99355	-5.8069	4.63658	-10.637	2.35297	1.66827	-5.47084	-7.07307	6.76192	-7.34757	-5.92493	3.78266	-4.88923	-7.26439	5.86238	-2.49846	-0.523022	-0.035855	3.09806	-2.93258	3.76971	7.88501	6.18585	-2.16896	2.51397	0.0150243	5.5297	-6.74346	9.5944	4.73451	-0.579821
666	-1.46048	5.46422	-9.16074	-6.40626	-0.732086	-9.7976	-1.04889	-4.74884	-6.40244	2.91004	-10.7051	7.39205	-3.34836	-4.8148	-7.91842	5.98582	-9.97061	0.743416	-9.20474	-4.01741	4.7605	-12.7523	2.32441	1.44695	-2.41029	-7.09701	6.78083	-5.47591	-8.5144	6.26844	-4.96907	-8.93801	6.47252	-2.11463	-0.764159	-0.0368404	2.60922	-2.9102	4.12704	7.58495	5.76374	-1.72349	2.95812	-0.357793	6.08991	-6.66996	9.14722	4.78724	-1.05339
667	-0.74311	4.04527	-9.16005	-6.33096	-1.69781	-9.44145	-1.24026	-6.03205	-3.80035	3.59244	-10.0578	-10.4071	-1.89827	-4.68254	-8.92831	5.56666	-8.62057	0.779745	-8.10247	-3.23116	4.9548	-9.04095	2.1926	1.45698	-6.28826	-7.30249	6.78725	-6.19106	-7.66179	3.61693	-4.61299	-10.0461	5.94195	-1.95416	-0.566384	-0.0937669	1.08056	-3.2733	4.09203	7.7606	5.85311	-1.96966	3.00291	0.0361385	5.43904	-6.72849	8.74342	4.81865	-0.470804
668	-1.06475	2.71414	-9.16129	-7.33016	0.167533	-9.89592	0.13248	-6.21698	-4.59852	4.63356	-10.6953	1.46833	-7.43829	-4.90608	-9.68404	5.9292	-6.69464	-0.401273	-8.71526	-5.08363	4.85592	-9.1248	2.21021	1.65129	-1.50043	-6.2747	6.78745	-7.49036	-7.16462	4.61084	-5.40781	-8.74489	5.8537	-2.38759	-2.93525	-0.173427	2.64104	-2.90661	3.79018	7.59341	5.83618	-2.06408	2.78506	-0.263488	5.2362	-6.66752	9.89987	4.7754	-1.07033
669	-1.00344	5.17264	-9.16696	-6.10019	-1.76989	-9.52805	-1.14454	-7.04056	-6.78555	3.1311	-10.686	2.33511	-3.10004	-4.66056	-11.1043	5.47816	-5.6	-0.497097	-8.01908	-2.89032	4.71945	-12.2077	2.26839	1.6224	-3.97776	-6.63012	6.76866	-7.6388	-8.32428	8.2649	-4.74234	-7.5198	6.60787	-2.03999	-0.0851069	-0.0367524	1.96961	-2.54729	4.05313	7.5797	5.82314	-2.22716	2.46756	0.113238	5.81824	-6.67497	8.50696	3.32616	-1.10801
670	-1.1544	5.58445	-9.1609	-7.20585	-0.304186	1.19374	-1.11271	-4.87486	-5.17707	5.05851	-10.6548	2.32614	-5.81944	-4.93439	-10.6277	5.33475	-10.2467	-0.863608	-9.41273	-5.75181	4.90067	-12.7513	2.4081	1.40662	-1.11128	-7.0468	6.78025	-5.31285	-5.92569	-7.01608	-7.43367	-9.81884	6.21749	-2.27658	-2.65499	-0.174728	1.86622	-2.42595	3.81503	7.66098	5.87141	-1.80486	2.47639	0.0735015	5.26304	-6.67098	9.01034	3.35394	-0.5277
671	-1.64747	3.79467	-9.16061	-6.48957	1.16963	1.05028	-0.803168	-7.78496	-5.79053	3.67638	-9.41941	1.26015	-2.12231	-4.66105	-11.1457	5.42807	-6.51006	-0.267919	-8.16604	-3.32645	4.70243	-10.3436	2.82322	1.47035	-4.8162	-4.33263	6.77841	-7.1628	-6.93812	-8.40815	-8.27188	-10.0911	6.07422	-2.13255	-1.14069	-0.0572225	2.63403	-3.56895	3.65433	7.79018	6.22554	-1.50649	2.49599	-0.00857061	5.16502	-6.65811	8.86801	3.35875	-1.06594
672	-0.768217	5.49639	-9.1611	-6.56627	-1.33864	0.61826	-1.38555	-5.09299	-3.49048	4.33413	-10.6831	0.990706	-4.298	-4.64818	-7.69006	5.31498	-6.01448	0.846025	-8.8563	-4.11401	4.9759	-9.19001	2.66935	1.44252	-3.13434	-7.4683	6.78721	-6.26956	-5.99715	-8.27721	-4.68831	-10.1849	6.32221	-1.98652	-2.87662	-0.0439823	1.82083	-3.64891	3.6895	7.58586	5.89229	-1.65903	2.28566	-0.133024	5.7329	-6.67986	9.91549	3.35463	-1.23055
673	-1.13947	4.98586	-4.11223	-6.6209	-0.518176	0.795671	-0.146735	-7.27067	-3.95036	5.15472	-10.6536	2.35936	-1.08231	-5.03401	-11.1576	5.36837	-6.42598	-0.475131	-8.38886	-2.75211	4.7504	-11.4868	2.9148	1.67898	-3.4574	-6.52083	6.77557	-7.20431	-8.51843	-8.13008	-6.40187	-10.2688	6.01511	-2.3998	-0.631883	-0.169537	1.82057	-2.44864	4.02971	7.56826	5.86045	-1.4454	2.2604	0.092764	5.23673	-6.677	9.05992	3.21385	-1.16408
674	-1.11039	5.49382	-6.29747	-6.24792	0.39123	0.959701	-2.19748	-5.08383	-5.38921	2.9735	-10.4294	0.732142	-7.1861	-4.92748	-8.69501	5.4808	-6.44938	0.610211	-8.22624	-5.64491	4.61725	-12.7463	2.91251	1.62538	-4.59644	-6.57064	6.794	-6.50986	-7.75443	-7.69714	-4.64085	-9.76533	6.04508	-2.12077	-2.95896	-0.0366467	2.89985	-3.09514	3.71208	7.66065	5.90352	-1.56661	2.41995	0.00920701	5.22783	-6.70199	9.81025	3.36803	-0.424866
675	-1.38532	4.24988	-4.25468	-7.54188	-1.65934	0.795539	-0.951839	-6.26211	-4.38074	3.83714	-10.7072	2.3412	-5.56319	-4.55818	-9.48034	5.63239	-6.38817	0.0547443	-8.49339	-4.21422	4.88138	-12.7473	2.68923	1.41522	-5.71104	-4.58217	6.77472	-7.23362	-8.53728	-7.19343	-5.17867	-9.10464	6.26516	-2.14901	-2.42074	-0.220414	2.77559	-2.86278	4.00151	-4.73977	5.80367	-2.20947	2.35513	-0.265507	6.37962	-6.66204	9.20055	3.28149	-1.29304
676	-1.56345	5.58852	-6.02884	-6.15518	2.50338	0.662976	-0.573589	-4.64302	-4.7115	4.44431	-10.6988	0.465465	6.39847	-4.41337	-11.0729	5.76637	-6.33685	-0.28604	7.66951	-3.44214	3.21574	-9.22707	2.83539	1.44455	-4.38348	-4.84869	6.78733	-5.14421	-5.93986	-6.87608	-6.15964	-10.2548	6.14231	-2.4109	-2.72497	-0.0381757	1.86239	-3.57456	3.97868	-3.45561	6.31633	-1.59697	3.74627	-0.420498	5.36677	-6.68025	9.8352	3.13861	-1.3824
677	-0.882755	2.8341	-4.15024	-6.13436	2.5005	0.62165	-0.365228	-6.01109	-6.0965	-8.0196	2.05798	2.36832	6.39191	-4.80901	-10.4203	6.01922	-6.45966	-0.162959	7.62773	-2.95246	3.18064	-10.9369	2.38778	1.4852	-6.10205	-7.16659	-2.68421	-6.56117	-7.70593	-6.92011	-7.1739	-9.86121	6.07931	-1.93776	-0.945528	-0.0413778	2.69646	-2.69873	-2.35492	-3.99922	8.50414	-1.45511	3.81969	-0.379704	5.193	-6.77174	9.92483	-2.24359	-1.3504
678	-1.49161	3.5423	-4.08793	-7.48721	2.41476	1.164	-1.15657	-7.84573	-5.56947	-7.88219	2.15847	0.230726	6.39343	-4.57959	-7.3558	5.88221	-6.40064	0.174177	7.66105	-5.48839	4.18339	-12.7485	2.52448	1.62697	-1.69497	-6.5678	-2.67407	-5.91015	-8.4237	-7.50097	-8.53981	-10.2308	6.16706	-2.30113	-0.26728	-0.0433553	1.91309	-2.70357	-4.16213	-4.97044	8.16152	-2.21543	3.86313	0.311524	5.25027	-6.67956	8.99155	-2.83829	-1.39949
679	-1.70021	5.56025	-5.77903	-6.19869	2.50467	0.586716	-0.0260106	-4.90402	-3.20533	-8.81972	2.26814	2.36617	6.39217	-4.88878	-10.8223	6.105	-6.18492	-0.836265	7.56036	-3.57251	3.36032	-12.7427	2.41556	1.41811	-3.63001	-7.18596	-2.69456	-7.4196	-6.26483	-8.3933	-4.62918	-9.95347	6.05162	-2.06377	-2.83782	-0.0309232	2.91617	-3.12264	-2.24616	-3.73077	9.10064	-2.01935	3.90829	0.297333	5.92265	-6.75085	8.48298	-2.90444	-1.38051
680	-0.803638	-6.19195	-4.10352	-6.3042	2.41125	1.04716	-2.00786	-7.47721	-4.81169	-8.3718	1.61879	2.31398	6.39196	-4.23031	-11.1606	9.39166	-6.28871	-1.06539	7.47242	-4.44748	4.18815	-9.27828	2.30637	1.50847	-3.33298	-5.11027	-2.6372	-4.99086	-7.89253	-8.40115	-5.32203	-9.37292	6.56867	-2.32233	-1.36639	1.88276	1.93893	-2.76477	-2.98301	-5.2136	8.63001	-1.50004	3.71701	0.591025	5.1844	-6.76778	9.02814	-2.87571	5.57294
681	-1.19269	-5.55287	-4.30366	-6.30068	2.48764	0.909296	-1.76074	-5.31558	-6.67032	-7.8562	2.36089	2.24579	6.39365	-5.03127	-8.43236	4.81091	-6.36618	7.69807	7.34979	-5.34636	4.23225	-9.39466	2.73226	1.46265	7.0046	-7.32614	-2.65005	-6.48712	-6.1013	-6.94819	-4.60024	-9.93367	5.93689	-2.04048	-0.612189	5.16188	2.85448	-2.66659	-2.33073	-3.60027	8.19913	-2.1407	3.72348	0.270253	5.11291	-6.66335	8.52584	-2.91956	5.53341
682	0.504423	-5.14346	-5.53387	-6.75752	2.48367	1.00406	-0.973434	-6.5185	-4.49766	-9.1243	1.67364	2.31884	6.39746	-4.64423	-9.30281	8.18026	-6.43936	7.70082	7.24757	-4.32831	3.12699	-11.8879	2.57409	1.63013	8.18916	-8.99736	-2.69588	-6.79402	-8.45899	-7.67911	7.87207	-10.2724	6.05085	-2.43631	-0.657435	3.85667	1.93934	-3.3735	-2.28828	-3.11946	8.89646	-1.48602	3.72364	-0.2594	5.19799	-0.416263	9.0685	-2.63775	5.61473
683	-0.0920429	-6.2209	-4.43028	-6.76566	2.77403	0.806785	0.268221	-5.80914	-6.88783	-8.37822	1.99932	2.2736	6.39768	-4.70992	-10.1835	7.19189	-6.51351	7.70016	7.19511	-3.04865	4.21164	-11.7167	2.49716	1.6507	8.02631	-9.53798	-2.49683	-4.84933	-7.81264	-8.26895	7.91654	-10.0099	6.39805	-2.34601	-2.69137	2.62073	2.92926	6.91426	-2.90805	-4.33649	8.28143	-1.43072	3.68312	-0.210265	5.29842	1.78925	8.98175	-2.77418	5.47702
684	-1.27715	-5.98778	-6.08681	-6.33472	2.39957	1.34264	-0.58422	-4.62548	-5.47092	-7.90284	2.4357	2.11646	6.39443	-4.30943	-11.1346	5.91264	-6.3955	7.69764	7.207	-3.71387	3.16734	-9.56401	2.28201	-9.35358	7.66098	-8.41632	-2.52808	-6.11489	-8.17316	-7.08702	7.72564	-10.2201	6.03361	-2.0868	-0.373983	1.70497	1.89431	6.90445	-3.94416	-3.29154	8.38605	-1.54167	3.65796	0.218271	5.25895	-0.255046	9.40335	-2.29344	5.69999
685	-1.17449	-5.31394	-6.35728	-6.18044	2.4854	0.623982	-1.97967	-4.62492	-4.08777	-8.61153	1.94785	2.27709	6.39375	-4.92272	-7.51196	5.429	-6.48865	7.70127	7.27088	-5.22719	4.1973	-12.7346	2.35328	-9.26877	8.20585	-9.25611	-2.43671	-6.99333	-8.27273	-8.40162	7.72294	-10.0594	5.81782	-2.4614	-2.90622	4.68918	2.65694	6.92245	-2.35256	-5.44726	9.14706	-1.6839	3.88434	0.244234	5.33321	1.74643	9.88831	-2.47457	5.58568
686	-1.09153	-5.19384	-4.21323	-7.73796	2.47482	0.828469	-2.27656	-5.32864	-4.91221	-8.15982	2.46779	2.0021	6.39121	-4.62288	-11.1474	10.6793	-6.45903	7.69841	7.37576	-4.57871	3.5779	-9.3274	2.60772	-9.49848	6.72545	-8.54422	-2.4659	-6.5313	-8.08534	-7.31248	7.80327	-9.62272	5.69159	-1.97311	-0.625575	1.50248	2.89014	6.80707	-2.8271	-3.86456	8.38323	-1.54156	3.86661	-0.194081	6.20877	-0.10743	-4.45827	-2.1278	5.41871
687	-0.120259	-5.70217	-4.99518	-6.44515	3.01566	1.07827	-1.05295	-5.55783	-3.6388	-8.72558	1.70593	2.32227	6.39674	-4.79887	-10.9741	8.40347	-6.17441	7.70038	7.61866	-3.83099	3.53173	-9.28432	2.75711	-9.33451	4.40924	-9.52992	-2.60724	-7.14922	-8.06092	-8.40318	8.01699	-10.2219	6.80872	-2.17576	-0.451368	2.41766	1.80103	6.80038	-2.27254	-4.52168	9.13716	-1.66082	3.76895	-0.892184	5.26219	1.70388	-2.95051	-1.88133	5.59137
688	0.392537	-5.86009	-4.77617	-6.98035	2.41536	0.674814	-1.01481	-7.86612	-6.54379	-8.18227	1.95677	1.93788	6.39155	-4.82831	-8.16208	9.63724	-6.05572	7.69974	7.51494	-3.0005	3.66945	-9.34685	2.30608	-9.31931	5.01288	-9.09286	-2.62141	-6.64199	-3.97979	-8.36998	7.72184	-9.82593	6.7168	-2.47835	0.379805	4.94174	2.47922	6.89891	-3.74589	-5.16441	7.99094	-2.24473	1.57241	-0.261779	5.21099	-0.10016	-3.21399	-1.98679	5.77206
689	0.448864	-5.05541	-4.30196	-6.91769	2.50475	1.04996	-0.988962	-7.64289	-5.67011	-8.99367	1.80384	2.28662	6.39727	-4.66103	-7.32227	6.41863	-6.54379	7.70204	7.66936	-9.19363	4.24512	-9.21248	2.44976	-9.34685	7.73812	-8.13711	-2.55517	-6.02716	-7.87503	-7.91488	7.72796	-10.4101	6.91675	-2.36418	-1.89755	3.57109	1.65831	6.88503	-2.61543	-4.05443	8.41333	-1.83338	2.78091	-1.51107	5.17362	-0.190539	-6.12257	-2.72469	5.62195
690	-0.091614	-5.49541	-5.81057	-6.35405	3.01453	1.04476	-1.51389	-7.85037	-5.35269	-7.98591	2.47985	1.91656	6.39222	-4.62871	-11.1255	7.43266	-6.56028	7.69967	7.83153	-6.78622	3.27372	-9.34066	2.89756	-9.34804	5.72404	-9.52064	-2.57451	-6.41133	-3.82928	-8.11259	7.80511	-10.0987	6.86987	-2.19805	-2.62751	3.30794	2.79475	6.79556	-4.85676	-5.15259	8.15819	-2.21262	2.44663	-0.271091	-9.0512	1.73806	-5.67226	-2.56972	5.44133
691	-0.978389	-6.23173	-5.25855	-6.51201	2.46973	0.892913	-1.55429	-5.56732	-6.25384	-8.56164	2.48707	1.8065	6.39279	-10.6609	-9.13386	4.61225	-6.62731	7.70081	7.66886	-10.0857	4.25505	-9.03825	2.85063	-9.44866	8.0697	-8.96968	-2.59282	-5.78502	-8.37067	-6.95989	7.72226	-9.85991	-8.20868	0.773901	-2.76817	2.22927	1.47918	6.80959	-2.1912	-4.04472	8.50518	-2.25104	2.93776	-1.56584	-8.84163	1.69806	-4.37181	-1.82662	5.3087
692	-0.0295049	-5.11228	-4.40208	-7.12423	2.42038	0.856584	-0.295147	-6.77683	-1.61454	-3.78289	1.97028	2.31271	6.39519	-10.5855	-11.0039	10.4329	-6.575	7.69939	7.68007	-8.06305	3.4473	-8.95358	2.8637	-9.50303	7.95198	-8.9171	-2.23968	-6.45737	-4.36706	-6.73365	7.96917	-9.9818	-8.30581	1.14519	0.135176	4.41922	-0.515828	6.91337	-3.56222	-5.17339	8.97241	-1.79891	1.65575	-0.927559	-8.68008	-1.44028	-4.28161	-1.82051	5.42906
693	-0.910436	-5.26956	-4.58423	-7.80689	2.8216	0.761631	-1.7499	-4.71481	-1.7629	-4.06478	1.9746	1.8634	6.39679	-10.4346	-9.93385	9.1401	-5.94777	7.70205	7.98046	-10.0685	3.90269	-9.12058	-3.02798	-9.40857	7.28998	-9.46964	-2.21954	10.8219	-8.22195	-8.3913	7.73186	-10.355	-8.12642	0.971115	-1.61691	4.13959	-1.91818	6.81726	-2.15173	-4.05025	8.64284	-2.32913	1.64348	-1.36485	-8.53964	-1.15639	-3.4715	-2.39522	5.62323
694	0.00370278	-5.68737	-4.5562	-6.20354	2.46241	0.791789	-1.28605	-6.43079	-1.53043	-2.07809	1.97337	2.30238	6.39224	-10.4158	-7.41618	10.1534	-6.50982	7.69988	8.10083	-10.0896	3.77159	-8.95443	-3.15801	-9.29825	6.22061	-8.27707	-2.19342	-6.12268	-4.17605	-7.14857	7.8168	-10.1993	-7.58007	1.35485	-2.81263	3.06238	-0.789285	6.89794	-5.07453	-5.15965	8.02473	-0.727046	1.69879	-0.817284	-8.49568	1.65016	-5.90478	-2.0986	5.79307
695	-0.842328	-6.17477	-5.54943	-7.72848	2.44238	0.706526	0.389773	-7.73307	-1.73659	-3.88632	2.48594	2.32047	6.39561	-10.3996	-11.0531	7.68911	-6.52099	7.70123	8.20227	-7.52682	4.08479	-8.91213	-3.4116	-9.36392	7.84319	-9.48487	-2.16474	-3.86127	-8.44944	-8.19751	7.72209	-9.79692	-7.59741	1.36083	-8.56774	1.28693	-1.06161	6.88904	-3.39935	-4.06213	8.29656	-1.87657	2.12785	-1.44304	-10.3526	-0.877374	-2.69487	-1.93251	5.74446
696	-0.0898779	-6.12978	-4.98368	-8.20548	2.45311	1.14759	-0.787498	-5.79238	-1.67354	-4.14074	2.45686	1.71088	6.39584	-10.3508	-8.02397	8.63473	-6.65154	7.6995	8.17603	-8.64023	4.12621	-9.19623	-3.02306	-9.26944	5.96797	-9.42209	-2.13925	-3.69327	-8.47391	-6.52719	8.05642	-10.1429	-8.31654	1.52409	-7.13257	2.05567	-2.03589	6.81007	-2.73023	-3.86513	8.26567	-3.32849	2.62179	-0.300528	-8.6728	1.53849	-6.52411	-1.86915	5.70759
697	0.178211	-5.14898	-4.71375	-7.23609	3.00384	0.941118	-3.38682	-3.01178	-1.62934	-2.08088	1.99994	2.30948	6.39179	-10.5267	-11.2406	6.67526	-6.45615	7.70346	8.07503	-9.36659	4.02115	-9.18578	-3.1735	-9.40275	7.73703	-7.64645	-2.40111	-6.50657	-8.34388	-7.44896	7.73953	-10.4123	-8.17614	1.19786	-7.41528	2.83637	-1.33538	6.8019	-2.16892	-3.75474	9.09406	-2.28576	1.92802	-1.03273	-10.1069	-0.631896	-4.54849	-2.21793	5.6912
698	-0.726171	-6.10057	-4.14579	-7.52658	2.51262	1.24672	-2.95455	-3.04666	-1.5504	-2.64468	2.17854	1.62519	6.39581	-10.4501	-8.88438	5.21623	-5.88345	7.70077	8.16805	-10.0926	4.19696	-9.31323	-3.01148	-9.46322	4.58182	-9.16023	-2.37201	-7.49776	-8.40423	-8.34229	7.72799	-9.76389	-8.16385	0.778999	-6.98155	-7.40318	-1.59768	6.81424	-3.24344	-4.98551	8.77845	-3.31572	1.75632	-0.202922	-8.56192	1.35112	-2.4443	-1.96535	5.55306
699	-0.650742	-5.04809	-5.32709	-7.59672	2.44506	0.72236	-3.91325	-3.19736	-1.77262	-3.43142	1.91993	-9.87705	6.39853	-10.6213	-10.5047	5.66777	-6.57295	7.70214	7.93194	-10.0344	2.9902	-9.23512	-3.39972	-9.29531	7.81458	-9.24695	-2.3386	-3.70817	-5.4737	-6.8891	8.08645	-10.2356	-7.8084	0.531023	-7.41714	-7.29918	-1.75706	6.9358	-4.39492	-3.9992	8.19466	-2.43037	2.29103	-1.29388	-9.87438	-2.0083	-4.51377	-2.25741	5.6325
700	-0.445299	-5.44686	-4.24149	-7.54166	2.45135	0.95443	-3.72069	-3.12213	-1.66773	-4.00199	2.38768	-10.0293	6.39215	-10.5589	-9.65202	9.88788	-6.55475	7.70101	7.58533	-6.58722	3.09351	-9.54995	-3.13341	-9.26565	8.33219	-8.85399	-2.29525	-3.76682	-6.32497	-7.90021	7.72287	-10.2092	-7.71915	0.841382	-7.85568	-7.30926	3.94455	6.83272	-2.51249	-5.0845	7.99234	-1.74595	3.603	-1.17811	-9.31735	0.0639382	-6.32439	-1.85048	5.48966
701	0.104989	-5.87463	-4.19687	-7.71252	2.42659	-9.20415	-3.88498	-3.13927	-1.51897	-4.88958	2.56079	-9.17776	6.39826	-10.3119	-6.15385	5.00645	-5.91042	7.70057	7.75898	-5.78999	4.15744	-9.40112	-3.38371	-9.4648	7.50741	-7.86483	-2.26362	-4.11189	-6.08438	2.29923	7.74391	-9.80916	-7.26585	0.660511	-7.65259	-7.02691	2.94418	6.8016	-4.63108	-3.94858	7.9626	-1.34746	3.69847	-0.166107	-8.82507	0.290414	-7.4891	-1.82183	5.5148
702	0.0401495	-6.02203	-5.18796	-8.13937	2.43825	-9.57351	-4.62803	-3.15706	-1.59523	-2.27097	1.85436	-9.22537	6.39361	-10.4773	-7.16924	7.94568	4.57059	7.69698	7.37516	-7.25582	3.15164	-9.50252	-3.14692	-9.4976	5.48777	-9.38827	-1.95358	-3.84305	-5.30083	2.27532	7.72185	-10.3082	-8.26606	0.929728	-7.67978	-7.26598	2.79779	6.92246	-3.10239	-5.35061	8.73651	-3.32542	3.65929	-0.204889	-9.60948	-1.71947	-3.97346	-2.43036	5.55349
703	-1.51504	-5.17235	-4.46363	-7.46498	2.74689	-8.67374	-3.63714	-3.15645	-1.7823	-2.887	1.77697	-9.51074	6.39487	-10.4771	-7.84012	8.88321	3.30146	7.69761	7.45055	-10.1008	4.19155	-9.40273	-3.22918	-9.25942	8.01871	-9.35445	-2.07274	-5.25355	-6.83454	2.2457	7.72983	-9.13257	-8.01776	0.57444	-8.06722	-7.41769	3.95844	6.81568	-2.31633	-4.69541	7.96159	-2.69407	3.19679	-1.23194	-8.39454	0.824168	-4.11599	-1.85071	5.48157
704	-1.37181	-5.35723	-1.13337	-7.80775	2.62288	-9.16689	-2.79277	-3.19418	-1.75173	-3.62893	2.58477	-9.97574	6.39175	-10.3772	-11.2426	6.16838	5.73431	7.70276	7.3613	-6.06929	4.18094	-9.47581	-3.0346	-9.46173	5.26035	-8.91893	-2.10475	-6.32126	-5.86448	2.21298	8.08838	-9.40579	-7.96541	0.998597	-8.41178	-7.43581	3.42775	6.82183	-2.42126	-5.34868	9.01135	-3.37774	3.04525	-0.955611	-10.5731	0.534648	-4.84933	-2.59888	5.54731
705	-0.538033	-5.40485	-1.4348	-7.48051	2.92486	-8.56925	-4.86017	-3.10639	-1.60482	-4.02184	1.61678	-9.84054	6.39894	-10.476	-8.6316	6.93283	5.11821	7.70051	7.51024	-8.86726	3.05445	-9.93688	-3.2429	-9.27261	8.28076	-7.99696	-2.03714	-7.63093	-6.57888	10.026	7.72287	-9.19064	-7.44575	1.08535	-6.91959	-7.00178	3.07887	6.89437	-2.22749	-4.34498	8.1524	-1.61081	3.49672	-1.12158	-10.78	1.1094	-6.72896	-1.94041	5.37058
706	0.343724	-5.14336	-1.39685	-8.26354	5.19683	-9.64064	-2.74203	-3.11298	-1.7401	-2.13762	1.69096	-9.46356	6.39233	-10.4216	-10.7222	-6.1652	3.44638	7.70398	7.41393	-10.1067	4.20026	-9.81164	-3.04045	-9.46072	7.8022	-9.33217	-1.97973	-7.04594	-5.65394	9.89361	7.75565	-9.22441	-8.24778	0.251607	-7.62054	-7.37951	3.51718	6.82417	-1.17543	-5.30301	8.83791	-1.48514	3.33836	-0.304366	-8.31448	-0.276052	-1.89373	-2.74929	5.46514
707	-1.46244	-5.56273	-1.39348	-7.85592	5.07971	-8.75444	-4.75731	-3.10504	-1.6848	-4.75764	6.88575	-9.9584	0.133434	-10.4536	-5.56253	-6.84454	5.74121	7.70064	-9.38658	-8.35274	-6.99441	-9.90612	-3.19382	-9.40808	4.76837	-9.43239	-2.01293	-3.9774	-4.74562	9.57137	7.72265	-9.43978	-8.35965	1.44454	-7.88067	-7.10647	3.9398	6.80361	-1.22945	-5.05557	8.06574	-2.5491	-2.59559	-1.81032	-10.7584	-0.279207	-7.75167	-2.07604	5.28874
708	-0.264215	-6.04336	-1.09414	-7.41609	5.18295	-9.18104	-3.94584	-2.98774	-1.69569	-2.43871	3.48979	-9.36716	1.00094	-10.5526	-9.8865	-6.75617	4.91247	7.6979	-9.60926	-10.0889	-6.59365	-9.72395	-3.21291	-9.41375	8.04	-8.66254	-8.16262	-7.75019	-7.28115	9.79947	8.10264	-8.80803	-8.06813	1.24216	-7.04858	-7.35337	3.8938	6.85013	-1.23284	-5.19462	-5.74246	-1.19769	-4.34225	-0.240018	-8.34392	2.11062	-4.58473	6.40388	5.50421
709	0.299521	-5.10223	-1.66279	-7.27618	5.20372	-9.69562	-3.75923	-3.13755	-1.52681	-4.35365	4.06163	-9.92134	0.338043	-10.3354	-6.91462	-5.9261	5.54346	7.70094	-9.2421	-9.69781	-6.81688	-9.63849	-3.03415	-9.51032	6.47014	-7.74425	-7.51862	-3.73767	-4.54967	10.2197	7.77154	-9.45558	-7.13893	0.938775	-8.51299	-7.07577	3.33595	6.86855	-1.14568	-4.88207	-2.48856	-2.81241	-2.7113	-0.274027	-10.7829	1.98254	-3.73065	5.03093	5.57665
710	-0.208166	-10.5084	-1.3794	-8.1101	4.39022	-8.76869	-3.94141	-2.86018	-1.6484	-3.96235	6.74758	-9.5687	1.04434	-10.3111	-7.62995	-7.16666	5.67001	7.6976	-8.52513	-9.58527	-6.60644	-9.51523	-3.26389	-9.27338	7.94795	-9.18942	-8.23905	-6.68989	-7.06254	10.29	7.72068	-9.24402	-8.3193	0.0711598	-7.19249	-7.52789	3.83275	6.94991	-1.06329	-3.58298	-5.77654	-2.92042	-4.02515	-0.488736	-8.45012	-0.240429	-4.67331	4.78957	5.25941
711	0.241772	-10.4223	-1.52287	-8.2367	5.06061	-9.33433	-4.10007	-3.14381	-1.58654	-2.69731	6.83578	-9.99524	0.546995	-10.434	-11.2168	-5.98909	4.73879	7.7027	-8.99781	-10.0895	-7.68938	-9.36205	-3.08531	-9.30307	0.916469	-8.76599	-7.55348	-5.47164	-5.12714	9.89312	8.1177	-8.77829	-7.94833	0.468196	-6.98367	-6.85184	3.21004	6.80312	-1.23513	-4.12401	-2.72507	-2.0337	-3.7427	-1.78872	-8.39639	-0.113786	-2.17438	5.28536	-3.22445
712	-1.33261	-10.3664	-1.23198	-7.35896	5.16286	-8.85855	-3.9569	-2.743	-1.74528	-4.6161	6.29954	-10.02	0.390231	-10.4011	-8.39784	-8.09186	3.60674	8.71432	-8.35929	-9.04052	-7.07278	-9.26132	-3.09857	-9.29168	3.65028	-9.49613	-7.94702	-7.81534	-7.67757	9.75201	7.78781	-9.47215	-8.12239	0.378523	-7.167	-7.39227	3.35597	6.84209	-1.01226	-5.18054	-5.72743	-2.11088	-2.78268	-0.364707	-10.667	1.83853	-5.12793	3.4023	-1.35478
713	-3.97586	-10.5011	-1.26222	-7.46652	4.45236	-9.74852	-3.25756	-2.6272	-1.71112	-2.46421	2.84279	-9.3809	-0.509784	-10.721	-10.9629	-6.29338	5.739	8.55595	-8.61904	-6.34994	-6.86871	-9.19576	-3.05025	-9.42035	4.46964	2.58708	-8.10722	-4.43706	-4.93975	10.2891	3.4066	-9.05143	-8.28827	0.844446	-7.21107	-7.55183	3.73849	6.92216	-1.07115	-4.06997	-2.01177	-1.96897	-3.88392	-1.70219	-8.57768	9.55844	-7.22612	6.00693	-3.23052
714	-4.29545	-10.4489	-1.22557	-7.39074	5.21406	-9.02426	-4.46539	-3.17114	-1.65867	-3.98917	7.12994	-9.99192	0.317774	-10.3545	-5.94325	-6.80802	5.34376	8.1881	-9.56502	-10.1121	-7.01233	-9.18093	-3.30161	-6.71163	3.38303	-3.44765	-7.46961	-3.99814	-7.4861	9.74737	-3.39563	-9.46961	-8.53858	1.6657	-7.52197	-7.32559	2.44754	-7.24541	-0.944086	-5.21766	-5.56656	-3.02534	-2.92802	-0.663491	-10.7756	9.71197	-4.19708	6.17579	0.5216
715	-3.95175	-10.4894	-1.30714	-7.66148	4.4946	-9.56291	-3.78805	-2.3153	-1.51146	-4.24295	7.57785	-9.46211	-0.455321	-10.5371	-9.14673	-5.89444	3.76258	8.53827	-8.666	-7.00549	-6.83021	-9.06361	-3.28544	-5.73409	1.70745	-2.58624	-8.03807	-7.81981	-2.30771	9.66245	-0.00393958	-9.07448	-7.1467	1.65138	-7.45966	-7.05152	3.64251	-5.66535	-1.18524	-4.50707	-2.25478	-0.9333	-4.24876	-0.327948	-10.7278	9.72769	-6.96531	3.1988	-3.16566
716	-3.91284	-10.4925	-1.29653	-7.14473	5.0817	-9.69035	-3.03767	-3.24617	-1.56588	-2.13809	5.52022	-9.14749	0.981983	-10.4191	-10.2898	-7.77944	5.78648	8.1903	-8.87727	-9.83511	-6.37	-9.00523	-3.06708	-6.20489	2.46216	-3.3089	-7.79473	-6.87164	-2.33554	10.2273	2.06906	-9.46122	-7.36554	1.40497	-7.7624	-7.49344	2.63246	-7.05843	-1.16369	-5.26589	-5.35668	-2.15335	-4.18802	-1.61733	-8.55295	9.78173	-5.41622	6.79066	-3.04039
717	-4.33346	-10.4962	-1.3951	-8.01425	4.95743	-8.98301	-2.8881	-3.14699	-1.72512	-3.97342	4.75565	-9.33784	0.0685	-10.43	-6.65415	-7.39477	5.70291	8.60617	-9.34618	-7.79395	-7.97692	-8.9249	-3.33321	-5.68785	2.91542	-3.22596	-7.86463	-4.26781	-2.26695	10.2717	2.96756	-9.10621	-7.81463	1.57169	-7.03366	-6.9319	3.31805	-5.19924	-0.696723	-4.21777	-1.52322	-3.11236	-4.35816	-0.371669	-8.50053	9.47846	2.77642	5.10188	-1.1307
718	-4.26998	-10.5085	-1.92847	-7.52571	5.23329	-8.9576	-3.96494	-2.49321	-1.7604	-3.20156	5.24346	-10.0978	0.611522	-10.2771	-7.40385	-6.35194	3.90946	8.41248	-9.00862	-9.83357	-6.78632	-8.59931	-3.12685	-6.29223	3.92634	-1.89162	-7.61232	-5.03885	-2.22953	9.70065	1.12705	-9.42677	-8.31538	0.141632	-8.24337	-6.92732	3.54419	-5.7532	-1.24072	-5.31314	-5.11863	-0.828809	-2.23213	10.6776	-10.617	9.5985	5.68196	5.93322	0.377068
719	-4.93836	-10.4904	-1.47046	-7.98673	5.13337	-9.30928	-3.75897	-2.3876	-1.64035	-4.47918	4.2887	-9.67398	1.13375	-10.3844	-8.18219	-8.27687	5.86906	8.76998	-8.57565	-10.1168	-6.20969	-8.96797	-3.31817	-6.81197	2.70119	-1.56469	-8.33148	-4.82989	-2.40643	10.2066	-2.36123	-9.16287	-7.21233	1.38325	-7.77801	-7.16653	3.39952	-5.36537	-0.920623	-3.8476	-1.7731	-1.05817	-4.18937	10.606	-8.55552	9.46182	6.28719	4.53638	-0.940779
720	-4.24569	-10.3997	-1.2853	-7.20602	4.4516	-9.59678	-3.51075	-3.01573	-1.75608	-3.94073	6.50337	-9.95941	1.0095	-10.5765	-5.76906	-5.9178	5.71883	8.29582	-8.48955	-9.6417	-7.39239	-8.80942	-3.37084	-6.96705	0.610187	-1.58725	-7.68802	-5.90961	-2.3114	10.1661	3.18785	-9.32189	-8.331	1.26112	-8.49354	-7.50459	3.45251	-7.4013	-1.2689	-2.889	-1.03424	-3.20225	-2.32083	10.6653	-8.47343	9.56928	6.1927	3.00764	-3.04249
721	-4.10579	-10.4809	-1.37623	-7.32006	5.25527	-8.99587	-4.28285	-3.04304	-1.57482	-2.25859	6.92831	-9.62498	1.03538	-10.3962	-11.1844	-6.8641	4.03292	8.76183	-9.66918	-9.50819	-7.08843	-9.01846	-3.10749	-6.39196	1.17875	-3.4271	-7.74011	-7.20289	-2.33802	9.77641	-1.2665	-9.33778	-7.86169	0.0589938	-8.53389	-7.1356	3.5255	-4.91498	-0.824034	-3.2941	-4.88077	-0.757834	-4.32228	10.1676	-2.10507	9.71046	6.5105	4.29508	-2.90733
722	-3.90674	-10.496	-1.24558	-7.17467	4.83575	-9.46606	-3.84925	-2.97726	-1.73031	-2.95213	7.75883	-9.84684	0.0594732	-8.43629	-9.4074	-6.93367	5.75855	8.57019	-8.40193	-9.63462	-6.20286	-7.62653	-3.11442	-5.61564	3.15316	-2.46421	-4.73696	-7.35613	-2.2727	9.65573	-3.15007	-8.98542	1.55554	-7.10594	-7.29425	-6.87986	3.38161	-5.86507	-0.749838	-3.86411	-4.39449	-3.26592	-3.95433	10.3936	-1.4324	9.30742	3.95141	6.5216	-2.8659
723	-4.88819	-10.478	-1.8993	-7.90649	4.4204	-9.33729	-3.85286	-2.30443	4.17428	-9.87015	5.78465	-9.30083	0.997326	-8.44855	-10.092	-7.68662	5.74598	8.67249	-9.65892	-9.61278	-6.84259	-7.09183	-3.35383	-6.45524	4.198	-3.46274	-3.60576	-5.69297	-2.23312	10.2782	3.6088	-9.36045	1.52142	-6.29034	-7.08235	-7.22766	3.45617	-4.62691	-0.616206	-2.90423	-1.27971	-2.24077	-4.10598	10.2407	-0.91106	9.18753	4.85678	5.27614	-3.15407
724	-4.88034	-10.4947	-1.21987	-7.64952	5.11955	-8.57001	-2.84055	-3.04232	4.34764	-9.94047	3.88075	-9.20868	-0.174985	-8.42266	-6.39535	-6.7571	5.92733	8.25814	-8.63362	-9.24728	-6.36037	-9.93819	-3.2604	-5.51556	2.21903	-1.63606	-3.60845	-4.62924	-2.32338	10.188	-0.268149	-9.0322	1.55923	-7.3194	-7.70526	-6.97844	3.33198	-5.86912	-0.496444	-3.00807	-4.14554	1.63645	-2.44278	10.1922	-1.75545	9.36886	5.83464	2.4365	-2.67899
725	-4.7919	-10.4931	-1.27799	-7.59303	4.49737	-9.04735	-2.91361	-2.98486	5.21523	-9.6898	3.2576	-10.0416	0.750899	-10.6031	-5.32833	-7.95155	4.19123	8.23838	-8.40067	-9.81578	-8.26438	-11.3623	-4.10134	-7.14035	1.45793	-2.85206	-4.66504	-4.33178	-2.29492	10.3131	2.7482	-9.39125	1.51004	-6.8638	-7.59115	-7.46336	3.60026	-5.00961	-0.574242	-3.34492	-4.6342	1.27545	-4.24491	10.7043	-0.923783	9.32987	2.50454	5.47101	-0.769069
726	-4.87321	-10.503	-1.81729	-0.348361	5.09745	-9.48358	-2.65894	-3.03981	5.15902	-10.0527	7.26464	-9.57325	1.09769	-10.6359	8.03325	-6.54962	2.87359	8.23302	-8.79991	-8.94566	-7.09984	-12.3238	-2.51763	-5.40993	1.9663	-1.58647	-3.60166	-4.79154	-2.26151	9.87857	1.86266	-9.01165	1.54906	-6.59586	-1.0257	-6.95302	3.69732	-7.49682	-0.527972	-2.94375	-3.66298	1.5781	-2.75189	10.5213	-2.27451	9.3978	6.37701	4.9156	-2.75028
727	-4.07314	-10.4933	-1.77676	-0.485401	4.61241	-9.52973	-3.13744	-3.06181	5.15426	-9.70501	2.69628	-10.06	1.02638	-10.8539	7.18019	-6.88181	5.75374	8.38041	-9.15282	-9.81054	-7.03566	-8.76557	-3.28739	-6.48905	1.59932	-2.08053	-4.76287	-5.50661	-2.38406	9.86224	0.853716	-8.89395	1.5105	-6.2625	-1.07583	-7.18893	3.333	-5.43046	-0.581654	-3.80135	-3.90422	1.35182	-2.46711	10.6986	-1.5906	9.59162	5.02995	6.84901	-0.604454
728	-4.20182	-10.468	-1.39329	0.0659364	5.11095	-9.44437	-6.30983	-7.83543	4.05918	-9.99705	4.52291	-9.82669	0.788178	-10.8207	6.11838	-6.14722	5.96357	8.25481	-9.52471	-9.38709	4.2051	-7.297	-2.34132	-7.26335	2.2274	-3.48862	-3.57856	-3.1737	-2.21693	9.86399	-2.09049	-9.26494	1.55431	-7.35605	-1.16624	-7.48099	3.3633	-5.99452	-0.616389	-3.06159	-0.291365	1.22022	-2.61696	10.283	-0.971979	9.42464	6.44775	5.75747	-0.450338
729	-4.1848	-10.4772	-1.17684	-0.162839	4.55219	-8.65128	-8.16604	-4.11717	5.26978	-10.0976	3.01877	-9.78689	0.815052	-10.8277	5.30416	-6.0428	2.65468	8.80834	-8.79452	-9.95379	-0.818009	-10.6276	-4.06339	-5.93449	1.66369	-1.5602	-4.7808	-5.01622	-2.29606	10.3784	-1.00789	-8.85554	1.51512	-6.64781	-0.888911	-3.63224	3.88821	-4.81124	-0.865257	-3.17876	-5.35128	1.66876	-2.2181	10.316	-2.41641	9.40544	4.14037	2.80308	0.690122
730	-4.15955	-10.5038	-1.44679	-3.22159	5.08925	-9.09843	-6.244	-5.14563	4.8698	-9.73729	7.92657	-9.81069	-0.162095	-10.8179	4.91129	-6.77086	4.38422	8.68964	-8.46724	-9.73207	2.19345	-9.47794	-3.18662	-6.09473	1.51512	-3.07705	-3.53736	-5.25899	-2.32798	9.58347	-0.520534	-9.28222	1.54244	-7.23284	-0.936382	-3.84723	3.80245	-6.27364	-0.661295	-2.89723	-3.19496	1.5863	-2.30739	10.8479	-1.91862	9.35512	5.97224	4.74809	-2.59612
731	-4.01768	-10.4793	-1.1727	-3.06634	4.5327	-9.52543	-7.17846	-7.67203	5.11781	-9.98435	4.99269	-7.46797	0.998227	-10.2432	7.8375	-7.86285	5.75931	8.52015	-9.65541	-9.51692	-0.508727	-7.76525	-3.2149	-6.53759	0.799603	-3.02291	-4.79276	-4.58058	-2.26557	10.1479	-3.89719	-9.30751	1.53243	-6.88204	-0.0949911	-3.79197	1.1837	-4.37254	-0.784544	-3.82366	-0.0482238	1.65082	-3.26342	10.5143	-1.04081	9.47836	3.58061	5.508	-0.307797
732	-4.02578	-10.4966	-1.93232	-3.689	5.08029	-4.71105	-8.69842	-6.73427	4.94315	-10.0718	3.69266	-7.68855	-0.378999	-10.7316	8.40553	-6.71388	3.11571	8.21935	-8.6164	-9.31397	2.7808	-11.8366	-4.09274	-5.32051	2.53309	-1.53276	-3.61565	-5.97152	-2.39991	-4.63553	1.65468	-8.92742	1.50497	-6.3172	-0.81541	-2.78635	1.17269	-6.07456	-0.724456	-3.12224	-5.45893	1.57205	-3.54055	10.4197	-2.64962	9.63964	5.20264	5.77326	-0.199216
733	-4.69284	-10.453	-1.87024	-3.34508	4.71103	-3.36922	-6.50715	-7.86414	4.54849	-9.80645	2.53629	-8.54553	1.08771	-10.3258	6.92902	-6.68758	-8.43218	8.33373	-9.43834	-9.00338	2.4898	-12.0764	-3.22558	-7.33632	1.31833	-3.42752	-3.58574	-4.3147	-2.28507	-5.44412	2.29493	-8.96105	1.51858	-7.27874	-1.18529	-3.05694	1.16	-5.60691	-0.926596	-3.23963	-3.42403	1.13339	-2.83794	10.1749	-2.54388	9.72226	4.67858	3.60702	-0.100332
734	-4.91384	-10.503	-1.46644	-2.97247	4.67435	-2.10127	-6.55913	-3.78703	4.97827	-9.92083	7.40858	-10.0346	-0.346124	-10.236	5.87573	-7.56371	-6.71151	8.33905	-9.49175	-9.73822	4.06643	-7.92432	-4.05583	-6.02568	1.34305	-1.69283	-3.57885	-3.3399	-2.24667	-5.06605	0.573482	-3.35469	1.53525	-6.90763	-1.69231	-3.81202	1.14352	-6.49361	-0.596668	-2.91228	-2.96865	1.7086	-2.69398	10.2135	-2.42614	9.70159	3.04945	4.05224	-2.25012
735	-4.24715	-10.5081	-2.26048	-3.65023	4.48649	-3.26319	-6.66239	-6.152	5.45382	-10.0876	6.64498	-7.57521	-0.486982	-10.439	5.16702	0.765521	-5.6422	8.77987	-8.36296	-9.29647	-0.206803	-8.53247	-3.46118	-5.84344	2.68483	-3.33021	-4.58072	-3.31671	-2.3687	-5.4905	-1.53895	-3.33883	1.52708	-6.70363	-0.00839045	-3.3563	1.15776	-5.64682	-1.06209	-3.1817	-0.786143	1.58031	-2.95193	-8.96886	-1.14286	9.43881	4.3219	6.26526	-2.43569
736	-4.28891	-10.4818	-1.00468	-3.2907	5.07793	-4.60607	-6.6976	-3.97778	4.74955	-10.0986	6.05259	-8.69961	0.715951	-10.8125	4.46683	0.76372	-4.04081	8.40317	-8.72071	-9.97735	1.59006	-11.1195	-4.03953	-6.59272	0.883323	-2.26671	-3.58241	-4.83649	-2.2873	-4.8501	-2.90384	-3.34389	1.53472	-6.41799	-1.45762	-3.86204	1.19312	-4.46692	-0.51097	-3.56584	-5.56966	1.74979	-2.97835	-8.98519	-2.81033	9.53728	5.37168	2.62049	0.00723137
737	-3.95	-10.4907	-4.94687	-3.4701	-4.63368	-2.28955	-7.9132	-7.03107	5.65134	-9.61071	7.0182	-7.95153	0.59818	-10.8656	6.65886	0.778624	-7.39986	8.6524	-9.66174	-9.47316	4.59253	-7.20057	-4.10721	-5.80565	1.48011	-1.77266	-3.59555	-4.54374	-2.24119	-5.17773	-0.760448	-3.35029	1.51254	-7.2986	0.156712	-2.72031	1.22119	-6.69267	9.04873	-2.91282	-0.538657	1.57647	-2.87527	-8.97749	-1.43439	9.6824	3.4386	5.63551	-2.04067
738	-4.97055	-10.5091	-2.49096	-2.86827	-5.18748	-0.49281	-9.75261	-5.8899	4.64024	-9.8574	-1.83624	-10.2765	2.2294	-10.7973	5.65839	0.742605	-9.55619	8.49548	-9.64687	-9.82143	4.47275	-12.5095	-2.98668	-6.12857	1.39844	-3.16552	-3.86998	-5.74641	-2.3762	-5.2817	-3.64969	0.60914	1.55656	-6.93957	-1.21514	-2.65945	1.18128	-5.49378	9.21532	-3.67632	-5.66308	1.15475	6.79737	-8.93844	-2.08717	9.76622	6.0864	6.62395	-1.58757
739	-4.10234	-10.485	-0.932987	-3.18374	-4.47423	-4.11053	-7.41356	-7.86648	5.23328	-10.0292	-2.11451	-7.32863	1.90307	-10.407	8.21945	0.756036	-3.20867	8.2402	-9.63837	-9.57332	-1.44142	-11.5988	-4.09397	-6.66687	1.52594	-1.53478	-3.07535	-3.23232	-2.26951	-5.32457	2.52096	0.958622	1.54348	-6.74709	0.0958398	-3.82314	1.12252	-4.64768	8.86954	-3.37354	-0.727999	1.52173	6.80043	-8.94524	-1.29212	9.56635	4.50195	-0.981409	0.121073
740	-4.59107	-10.4529	-5.48126	-3.09413	-5.20891	-3.16048	-6.17178	-4.8854	5.83467	-9.85982	-1.79322	-10.4091	1.69008	-10.5416	5.06077	0.767845	-8.16617	8.4685	-9.659	-9.50579	4.34354	-9.70849	-2.74714	-7.57565	1.72024	-3.40548	-3.15158	-3.32232	-2.23844	-4.22941	0.285996	1.14246	1.50646	-6.36277	-1.2102	-2.99159	1.12147	-5.1772	9.20867	-2.92088	-1.43528	1.57172	6.79816	-8.95642	-2.25489	9.70432	3.75129	-1.01901	0.252041
741	-4.44988	-4.48566	-2.7709	-3.58102	-5.1563	-2.31063	-8.42798	-6.43767	5.10682	-9.73828	-2.17035	-8.22642	1.67462	-10.2712	7.41095	0.743131	-4.32015	8.29405	-9.64981	-9.03225	-1.12891	-12.4925	-3.90674	-6.16069	0.813089	-2.88574	-3.99843	-5.08293	-2.35126	-4.31984	-1.81101	0.664603	1.5039	-6.98563	-0.117093	-3.72227	1.30485	-5.57248	8.69691	-3.76434	-0.809217	1.37817	6.80257	-8.97068	-1.18021	9.74323	3.28275	-0.99311	-1.81186
742	-4.94932	-3.80376	-5.23584	-2.95865	-4.59068	-4.46984	-6.22841	-7.74309	4.93738	-10.0996	-1.69985	-8.19311	1.82167	-10.5115	4.80016	0.742577	-2.92016	8.73896	-9.66117	-9.12124	1.89022	-8.10618	-3.83894	-5.76794	1.01467	-2.69367	-3.6739	-3.8855	-2.27329	-5.29132	-2.63711	1.26218	1.53306	-6.78151	-0.912576	-3.44105	1.53069	-4.39056	8.80376	-3.82786	-0.839747	1.1574	6.79672	-8.90165	-1.27808	9.62411	5.53278	-1.02512	1.45915
743	-3.88805	-5.14113	-1.66981	-3.32638	-4.38843	-0.655263	-9.49838	-3.6818	5.99635	-10.0721	-1.74288	-10.4103	2.2555	-10.8622	6.37667	0.763036	-9.28344	-2.08454	-9.65583	-9.38647	3.28403	-7.39749	-3.98057	-6.73335	1.88017	-2.67738	-3.75881	-5.33445	-2.3548	-5.47918	6.66854	0.550577	1.49246	-6.54101	-2.19794	-3.1498	1.74594	-6.87007	9.19324	-2.9501	-1.50255	1.57678	6.79398	-8.93307	-2.74209	9.48004	-6.04159	-1.07122	1.74908
744	-7.71387	-5.02067	-4.15747	-3.66246	-5.27412	-2.90036	-7.66541	-3.96077	5.33368	-10.0938	-1.56826	-8.49817	1.63471	-10.8613	4.26609	0.740377	-6.93256	-1.99494	-9.66195	-9.78248	0.399046	-10.3931	-3.66201	-7.4368	1.3014	-1.59085	-3.4077	-3.27396	-2.24354	-4.45716	7.35539	0.710053	1.58306	-7.30375	0.13544	-2.92512	1.95739	-5.60197	8.58706	-3.54079	-0.805606	1.19539	6.80119	-8.92789	-1.77109	1.99376	-6.0853	-1.18619	1.7922
745	-6.38127	-3.71879	-1.92622	-3.53129	-4.29079	-4.29907	-6.37702	-7.2756	5.30643	-10.0631	-1.81004	-8.3628	2.1534	-10.2841	5.46704	0.757557	-6.23548	-2.11457	-9.65639	-9.29014	4.83225	-12.4716	-3.74793	-3.81835	1.4431	-7.18003	-4.58602	-3.86147	-2.28085	-5.40983	7.31354	1.34952	1.51089	-6.27198	-1.11506	-3.80564	2.18622	-4.0508	9.12134	-2.86529	-1.10993	1.43504	6.80066	-8.91029	-2.57738	-0.108164	-6.1968	-1.26381	1.57457
746	-6.4451	-4.07324	-4.64795	-2.92942	-4.55486	-2.27272	-9.24121	-3.54537	4.76726	-9.4664	-2.17645	-7.15644	2.12423	-10.5758	8.64113	0.74255	-5.40569	-2.14859	-9.6591	-9.24144	1.28594	-9.24815	-3.79195	-3.83568	1.14948	-6.19112	-4.69386	-5.59145	4.3584	-4.19714	6.59942	0.477157	1.4868	-7.04345	0.0386421	-3.51062	2.24725	-2.45102	9.16357	-3.72625	-1.01851	1.58665	6.79762	-8.90625	-1.0736	1.86849	-6.18059	-1.13782	1.46562
747	-6.82537	-5.2369	-4.39832	-3.59153	-5.08087	-2.27089	-6.35173	-5.40399	5.33784	-10.068	-1.45908	-7.78955	2.04602	-10.4094	4.97797	0.75201	-7.90595	-1.99354	-9.65751	-9.49416	4.69924	-10.8766	-3.83788	-3.73685	2.04251	-3.46864	-3.48251	-3.48083	3.7656	-4.37527	6.82951	1.21216	1.57119	-6.81874	-1.01431	-3.17953	2.21164	-3.93904	8.89027	-2.9817	-0.742217	1.60599	6.80053	-8.93185	-0.932516	-0.0414149	-6.07573	-1.29416	1.51288
748	-6.40597	-5.07117	-2.07384	-3.41833	-4.60489	-3.92231	-9.98863	-7.84293	4.19216	-9.79262	-1.65234	-8.78383	2.19368	-10.8385	4.65207	0.73968	-4.59742	-2.03288	-9.65427	-9.54949	-2.06682	-7.50358	-3.62235	-3.80863	1.29402	-4.51311	-4.14538	-3.30651	3.24332	-4.33235	7.2221	1.37079	1.58907	-6.47954	-1.94831	-2.59295	2.4983	-2.7706	8.85465	-3.42615	-1.29045	1.59462	6.80347	-8.93029	-1.60091	0.201692	-6.13114	-1.33372	1.60595
749	-6.44194	-4.32003	-3.55976	-3.16813	-4.31732	-0.847567	-6.92376	-4.62856	4.08049	-9.89886	-2.17905	-10.4136	1.59788	-10.6902	7.63301	0.75381	-3.76394	-1.8075	-6.57919	-8.95417	3.04411	-10.1577	-3.94418	-3.83099	1.58552	-6.52836	-3.32319	-4.07078	4.79065	-4.18829	7.23349	1.10272	1.48323	-6.84599	-2.67429	-3.48649	2.23341	-2.36092	9.07798	-2.88404	-0.857615	1.58349	6.79791	-8.93156	-1.94308	1.63901	-6.11625	-1.41127	1.46393
750	-6.52558	-4.57358	-6.15733	-3.49459	-5.05523	-2.34001	-8.96754	-3.9238	4.50502	-9.69123	-1.69377	-7.16572	1.57166	-10.85	-6.44411	0.741584	-5.14889	-2.00384	-3.68794	-9.42656	-1.7516	-9.00698	-3.98812	-3.73703	0.970258	-4.16889	-4.29707	-3.66928	4.11305	-4.26103	6.61942	1.34065	1.56615	-6.26077	-0.766306	-3.8306	2.32209	-2.31146	8.97648	8.26594	-0.745417	1.52877	6.80107	-8.92134	-2.84436	0.0709319	-6.78047	-1.37213	1.47849
751	-6.47269	-3.84286	-6.02719	-3.61499	-5.26364	-1.07634	-6.46115	-7.87998	5.32315	-10.0732	-2.16696	-8.03133	1.97593	-10.4148	-3.58848	0.743165	-6.03761	-1.804	-5.38601	-7.29925	0.982304	-8.31094	-3.3893	-3.80056	1.64068	-6.93538	-4.45147	-3.46198	4.48103	-4.62278	6.65636	1.2566	1.57567	-4.73099	-0.314084	-2.85496	2.28263	-2.56988	9.07402	8.55066	-0.97007	1.58744	6.79916	-8.92656	-0.991218	1.77852	-6.03564	-0.938025	1.63579
752	-8.89152	-5.29339	-1.79502	-3.03159	-5.11603	-3.75543	-6.34758	-3.36791	5.27685	-10.0704	-1.34475	-9.3496	2.17238	-10.7315	-6.68931	0.768789	-7.16325	-2.15769	-6.60313	-7.5791	3.90967	-8.07482	-3.90345	-3.79538	0.817936	-5.83881	-3.23648	-3.16746	3.5404	-4.92539	6.95234	0.803687	1.59435	-5.86314	-0.817228	-3.12867	1.84017	-3.79917	9.0415	8.74101	-0.714277	1.81576	6.8023	-8.92897	2.71254	0.370019	-6.83534	-1.46762	1.8366
753	-6.73486	-4.19106	-3.74315	-3.53409	-4.64874	-2.50087	-6.80175	-5.65365	4.36057	-10.098	-1.21371	-10.397	1.5736	-10.3601	-3.39845	0.767766	-9.00002	-1.97414	-5.11563	-9.95877	0.0977923	-7.99128	-3.4969	-3.74259	1.41329	-7.63797	-5.57877	-3.21004	3.27951	-5.49884	7.36333	1.13961	7.21916	-6.15742	-2.42752	-2.53524	2.27996	-3.22421	9.12461	8.33189	-0.407424	1.61562	6.8002	-8.9239	1.8703	0.10057	-6.00831	-0.926294	1.48484
754	-7.42589	-5.12122	-1.54557	-3.37791	-5.20297	-3.04851	-6.15805	-4.36853	-9.23641	-9.60268	-1.60744	-7.42034	2.27442	-10.1757	-6.19401	0.74308	-2.63757	-1.80864	-4.00462	-8.55377	3.72993	-7.9948	-3.94717	-3.82204	2.36631	-4.85061	-5.73295	-3.64107	3.97682	-4.99534	6.52755	0.714347	6.6346	-4.39919	-0.751167	-3.78799	2.02578	-3.36459	8.93307	8.68221	-1.3401	1.66901	6.80466	-8.93161	0.738564	1.524	-6.3513	-1.53319	1.88865
755	-6.52118	-4.65438	-3.90777	-3.60937	-4.29168	-3.61202	-10.3483	-7.59921	-9.61369	-9.87038	-2.1452	-7.65204	1.58108	2.7328	-3.17175	0.767853	-10.2429	-2.19136	-6.58841	-7.40343	3.5231	-9.34029	4.62998	-3.79009	1.59903	-3.69227	-5.27016	-4.11036	4.60928	-5.12517	6.71677	1.3049	7.08436	-4.99593	-0.53334	-3.83968	2.04109	-2.66993	8.81995	8.85501	-0.77831	1.4337	6.79746	-8.94923	1.6982	1.2777	-6.03904	-0.913782	1.44181
756	-6.41195	-5.21642	-6.27948	-3.43854	-4.25814	-4.85147	-10.3535	-7.93702	-9.64468	9.29729	-1.5702	-9.07006	1.58958	2.71247	-5.96623	0.747012	-7.64822	-2.20898	-4.01303	-7.68038	0.689806	-7.99584	4.94031	-3.81507	1.32169	-5.65564	-5.43344	6.60848	4.05095	-5.69995	7.08495	1.2536	7.33593	-4.76216	-0.771686	-3.25639	2.16635	-3.07525	9.02162	8.68641	-0.947233	0.636073	6.79557	-8.9558	1.62782	1.40853	-6.67083	-1.73542	1.49709
757	-7.1582	-4.73739	-1.40323	-3.26406	-4.9904	-1.32676	-10.3488	-3.87301	-9.34703	8.61412	-1.0631	-7.71571	1.57413	2.96104	-2.94639	0.762277	-4.87564	-1.88667	-3.87352	-9.3701	4.76803	-8.03782	4.70246	-3.74713	0.89999	-3.2736	-5.69597	5.18868	3.20743	-4.4997	7.37311	0.852881	6.84912	-4.2333	-9.35129	-3.54754	1.93083	-2.91783	8.88033	8.27255	-0.90438	0.500882	6.79998	-8.94209	2.88228	-0.020185	-6.51875	-1.59085	1.93523
758	-6.57463	-3.41522	-6.36695	-2.88787	-4.28636	-1.85041	-10.3415	-6.96248	-9.61161	8.02842	-2.11075	-6.99443	2.09514	2.81003	-5.45938	0.7653	-3.48578	-2.21788	-5.80554	-7.54746	-2.37199	-8.8531	4.90659	-3.741	-8.39233	-4.34296	-5.48272	4.76375	4.80161	-5.90008	6.41813	1.29275	6.72769	-5.07449	-9.42178	-3.10814	1.97018	-2.94888	8.94333	8.86068	-1.19169	0.644585	6.79661	-8.87356	0.561534	1.09823	-6.74129	-0.896066	1.5592
759	-6.3572	-4.88352	-5.68908	-2.89959	-4.53863	-1.58493	-10.3481	-7.01989	-9.53582	9.31812	-0.919701	-9.59644	1.61278	2.68342	-2.75605	0.751616	-6.49601	-1.83903	-4.39302	-9.94146	7.65889	-8.05186	4.86477	-3.74703	-8.53538	-6.36317	-5.29899	7.65696	4.41494	-4.53224	6.78351	0.995906	7.43133	-5.91063	-9.34192	-3.87711	1.76234	-3.67463	9.10047	8.84605	-0.492493	0.174039	6.79627	-8.88001	1.42297	-0.0994761	-6.6719	-0.934658	1.57068
760	-6.44508	-4.97736	-3.00982	-3.18672	-4.85969	-3.48214	-10.337	-7.25037	-9.62229	7.93266	-1.57723	-7.89154	2.28992	2.85208	-2.09618	0.771163	-9.83061	-1.97716	-2.96026	-7.37527	7.59765	-7.99398	4.6737	-3.78465	-7.95849	-6.02189	-6.09182	6.8179	4.04032	-4.7931	6.83175	1.32266	7.13538	-4.53766	-9.41727	-0.538557	1.51793	-3.92899	9.17483	8.61824	-0.796249	0.262343	6.7982	-8.8845	2.32241	-0.132493	-6.54735	-1.65324	1.94766
761	-6.32324	-3.90104	-1.2497	-10.6269	-4.39315	-4.78711	-5.12813	-7.14529	-9.50257	7.09893	-0.772556	-3.42744	1.74533	2.76099	-5.71515	0.737495	-8.71277	-1.828	-5.37529	-9.58776	7.23653	-9.11818	4.9797	-3.79558	-8.55291	-5.00629	-5.92051	4.89056	3.94818	-4.72937	7.46114	0.441074	6.98505	-5.1645	-9.35031	-0.535812	1.30082	-2.98179	8.99103	8.94081	-0.915628	0.610331	6.78856	-8.92843	1.91081	0.868562	-6.81597	-1.85389	1.53647
762	-7.00129	-5.10572	-3.20362	-10.4263	-4.46425	-10.3764	-5.09947	-7.08711	-9.6059	9.24208	-2.08154	-4.47035	1.65169	5.20285	-2.5354	0.772561	-5.85211	-1.87067	-5.27024	-7.29902	7.68509	-8.52732	4.97958	-3.7485	-8.20551	-3.57001	-5.89348	5.02252	4.28306	-6.06473	7.26786	0.937357	7.40898	-4.81815	-9.28067	-0.5508	-5.07576	-4.03393	9.20212	8.23739	-1.49969	0.545012	6.80223	-8.96018	2.87024	0.792106	-6.75485	-0.833904	1.59397
763	-6.65506	-4.39452	-1.11565	-10.577	-4.13085	-8.09783	8.5692	-7.33832	-9.60749	9.36194	-2.05669	-3.62045	1.68084	3.28319	-4.99381	0.743031	-7.61165	-2.03504	-6.51259	-7.56112	7.31919	-8.12408	4.96768	-3.75063	-8.53905	-7.05934	0.89727	7.19983	4.83332	-0.245473	6.8756	0.81734	7.32034	-5.92128	-9.41347	-0.543213	-5.48528	-3.5352	8.54589	8.86029	-0.549835	0.843213	6.80003	-8.89684	0.53771	0.719442	-6.25492	-0.771027	1.93745
764	-6.45244	-4.41329	-3.38825	-10.4736	-4.71884	-9.955	8.63273	-6.98492	-9.63917	8.75072	-1.74738	-5.12932	2.27932	5.80877	-2.30329	0.741322	-8.39823	-2.23837	-5.58343	-7.62219	7.22289	-8.09793	4.31113	-3.74254	-8.119	-6.80746	0.821981	4.62968	4.19634	1.89211	6.7259	0.449955	7.41658	-4.47142	-9.38156	-0.549961	-5.14468	-2.9937	9.2052	8.91004	-0.83728	0.116417	6.79457	-8.95361	0.394463	0.251524	-6.6156	-1.9884	1.91227
765	-8.60236	-4.99064	-5.87238	-10.64	-4.30328	-10.3007	8.35176	5.71187	-9.07671	8.22256	-1.89293	-3.53824	1.68177	7.30777	-5.22651	0.774608	-9.42932	-1.88791	-4.06417	-7.40437	7.51883	-7.99333	4.28092	-3.79369	-8.03108	-3.9976	0.79083	5.46852	3.70513	4.01195	7.34058	1.05849	7.39878	-4.78997	-9.29424	-0.543594	-6.6541	-3.79508	8.60872	8.80272	-0.442124	0.0636918	6.79943	-8.88855	2.11302	0.597122	-6.4045	-2.14824	1.84052
766	-6.32724	-3.98532	-6.74276	-10.662	-4.61555	-7.18711	8.39753	5.75558	-9.61021	7.24933	-2.03274	-3.17484	2.23358	7.10879	-7.58126	-8.88788	-7.29715	-1.92024	-4.6426	-7.34132	7.18323	-8.57019	4.35487	-3.79297	-8.54209	-7.31765	0.603603	7.62316	3.97075	0.00902255	7.53433	0.539974	7.27754	-5.27346	-9.42073	-0.515734	-5.53579	-4.19393	8.72712	8.73127	-0.87245	0.574384	6.80084	7.16225	2.74234	0.66951	-6.4416	-0.745853	1.62151
767	-6.52357	-3.55739	-7.93313	-10.6033	-4.42968	-10.2748	8.45139	5.95272	-9.60432	9.27183	-1.62794	-3.86411	1.62667	6.99395	-4.75705	-8.78231	-7.23407	-1.96785	-6.779	-9.93623	7.43311	-8.47029	4.46428	-3.74736	-7.92265	-3.83512	0.687374	4.67083	4.73611	0.974414	6.99733	1.16361	7.64075	-4.14021	-9.29042	-0.547284	-6.62218	-2.33632	9.21153	8.69477	-1.44238	0.617825	6.79621	5.73168	1.25575	0.413198	-6.49755	-0.801954	1.68283
768	-8.01692	-5.12202	-8.51517	-10.5588	-7.90306	-8.70586	8.38246	5.33697	-9.50395	8.12205	-2.01674	-3.85613	1.6926	4.31405	-4.53422	-8.46586	-7.44763	-2.22894	-6.31909	-9.7534	7.18647	-8.32007	4.40665	-3.74136	-8.2198	-7.46931	0.714063	5.33167	4.0331	1.47835	6.65427	0.576695	6.53115	-4.84659	-9.38632	-0.526433	-5.50208	-4.19169	-2.78492	8.77197	-0.391623	0.55032	6.79809	5.96595	0.275658	0.666951	-6.64677	-2.31515	1.8001
769	-6.98686	-4.43155	-9.83424	-10.4523	-7.84643	-10.2732	8.64202	5.20855	-9.62061	8.68025	-9.40732	-4.63848	2.56534	4.83818	-7.52487	-8.85005	-9.23681	-2.00466	-3.18093	-8.05715	7.39267	-7.99535	4.57843	-3.75742	-8.57711	-6.67612	1.00865	6.05075	3.86049	2.6368	7.57319	-10.033	7.21751	-5.98707	-9.42437	-0.54881	-5.23442	-2.45684	-3.05642	8.43717	-0.817558	0.719767	1.5946	7.20941	3.24623	0.534661	-6.14892	-0.87263	1.75554
770	-6.34469	-5.07379	-9.96387	-10.6889	-7.22257	-9.03141	8.44075	5.67651	-9.63913	9.37663	-10.5998	-3.31249	2.07435	2.73775	-4.36891	-8.46991	-7.65632	-1.95654	-2.80237	-9.11397	7.36951	-8.13862	4.52058	-3.74776	-8.55984	-5.31774	0.581035	7.61847	4.77313	0.493638	6.99566	-9.27476	6.56842	-4.65104	-9.29314	-0.53827	-5.38024	-4.12687	-3.00828	8.82304	8.36486	0.59013	2.06902	3.1637	2.5211	0.763216	-6.33106	10.6666	1.65452
771	-6.91628	-3.96387	-6.46964	-10.6125	-7.89892	-7.4826	8.65303	5.79576	-9.20106	7.37368	-8.77092	-3.65903	1.99648	5.37513	-4.22992	-8.89849	-8.18543	-2.06259	-3.44293	-7.59024	7.47821	-8.21861	4.38186	-3.81534	-8.53098	-4.68847	0.47264	7.02917	3.39874	-0.145151	7.1207	-9.82257	7.53475	-6.04662	-9.42478	-0.547276	-5.5201	-4.08799	-2.85816	8.80652	7.94922	0.961269	1.7107	5.53442	0.949893	2.65427	-6.27758	10.6993	1.6808
772	-8.31533	1.08874	-9.88294	-10.5988	-7.84421	-10.2255	8.36378	5.12424	-9.6412	8.48965	-10.3579	-5.30034	2.45808	6.27799	-1.89021	-8.88297	-7.31748	-1.83688	-5.3495	-7.47354	7.32949	-8.00195	4.3279	-3.83873	-8.14193	-5.16588	0.915297	5.75803	4.59822	-0.0740992	6.61212	-9.7534	7.08158	-4.88476	-9.37381	-0.511626	-5.52572	-2.59112	-3.20356	8.34221	8.06802	0.496426	1.48269	7.11827	2.09362	2.43024	-6.74776	10.6277	1.72142
773	-6.45894	-0.74847	-9.63262	-10.6163	-7.33602	-10.4477	8.61667	5.51564	-9.57693	9.02238	-9.17082	-3.21572	2.65603	7.4236	-4.12743	-8.42721	-7.18813	-1.93268	-4.18752	-7.41907	7.29475	-8.01637	4.42173	-3.7905	-8.34198	-3.37068	1.147	7.65534	3.87974	0.828665	7.14525	-10.372	6.55305	-5.40023	-9.32864	-0.536961	-5.65995	-2.86937	-5.20418	8.43321	8.28638	0.509398	1.7991	3.0147	3.04653	0.812177	-6.7827	10.6433	0.104665
774	-6.47403	-0.578128	-10.0981	-10.6405	-7.90736	-6.62304	8.48891	5.63355	-9.45337	9.34701	-8.87664	-3.37673	1.96695	7.09805	-7.30825	-8.92526	-7.73155	-6.1736	-5.44334	-7.27083	7.57253	-8.15715	4.25893	-3.78226	-8.17171	-5.47686	1.09952	6.10009	3.5466	1.35588	4.5271	-9.84796	6.921	-4.59803	-9.39452	-0.501999	-5.57972	-4.12931	-2.67504	8.83258	7.90928	0.52124	1.85837	2.93423	0.282545	2.17796	2.5743	10.6358	0.12056
775	-9.58986	1.36709	-8.74029	-10.5647	-7.89685	-9.34261	8.62125	5.10958	-9.41923	7.48489	-10.2272	-3.20655	1.99168	4.1031	-4.02963	-8.63293	-7.27639	-6.47956	-6.64376	-7.85248	7.42751	-8.02451	4.26257	-3.73865	-8.55773	-3.18253	1.07142	7.62238	4.67819	2.07622	4.33588	-9.73448	7.81888	-5.55671	-9.42017	-0.539245	-5.31957	-2.73449	-3.3182	8.53452	8.14552	0.49118	1.68826	6.99942	1.43223	-6.13529	0.120272	9.99999	0.115991
776	-9.59072	-0.372338	-7.61747	-10.5509	-7.83014	-10.4425	8.57271	5.85577	-9.63211	8.40847	-9.80376	-3.76846	2.61762	4.6312	-7.43718	-8.867	-7.39241	-6.88107	-6.61196	-9.9645	7.65444	-8.34653	4.29302	7.89531	-8.32959	4.94188	0.490614	5.60446	3.90859	0.330728	4.61072	-10.2527	7.74048	-6.09289	-9.30167	-0.52618	-5.52561	5.46649	-2.54821	8.50778	8.19441	0.523383	1.9313	6.72633	0.802341	-6.51155	3.50731	8.97518	0.106488
777	-9.59367	1.40906	-9.83062	-10.6614	-7.91197	-7.79614	8.65321	5.55208	-9.48288	9.15204	-10.6217	-3.65744	2.07484	6.87492	-6.92614	9.87912	-9.02555	-5.88932	-6.064	-7.47918	7.30202	-8.40829	4.27026	7.89485	-8.15577	5.57021	0.991243	7.36121	-6.90653	3.28918	4.66469	-9.16598	6.52583	-4.32002	-9.42424	-0.54004	-5.83707	6.56166	-2.58438	8.56173	7.85812	1.20525	1.66505	3.98037	2.56535	-6.39306	4.67966	10.27	0.120143
778	9.23366	1.3931	-7.43679	-10.6047	-7.88939	-10.5468	8.36042	5.98895	-9.56944	7.60323	-10.6155	-4.80643	2.58144	5.06443	-3.93351	10.6246	-7.39406	-6.08377	-3.97292	-8.8391	7.29389	-8.0139	4.88387	7.89776	-8.53745	5.48921	-0.000948597	7.74002	-6.75224	2.91908	4.79684	-9.71502	6.75462	-5.73342	-9.31489	-0.538774	-5.44488	7.18842	-4.83994	8.84898	8.1225	0.562088	1.45544	3.75408	1.01097	-5.86242	3.74271	9.02947	0.103971
779	9.90359	-0.727952	-10.1129	-10.595	-7.17718	-10.299	8.54646	6.07568	-9.29258	8.5557	-9.9963	-3.57624	2.05444	3.00236	-3.78199	9.65084	-7.96956	-7.07394	-4.8949	-6.86251	7.49756	-7.98583	4.82088	7.89498	-8.54388	5.06839	1.30877	6.17371	-6.09784	-0.543376	4.73955	-10.0033	6.58583	-4.69644	-9.3906	-0.552513	-6.01346	5.72284	-5.02706	8.62047	8.09706	0.464618	1.6651	7.08378	3.07311	-5.88282	5.69883	9.74309	0.106665
780	8.62932	0.840587	-9.74376	-10.5591	-7.91851	-9.65355	8.35859	5.14054	-8.984	8.80952	-10.241	-3.72556	2.53809	7.15158	-7.12574	10.7722	-9.62158	-5.72766	-9.70446	-8.25585	7.34973	-8.27284	4.96323	7.89882	-8.09725	5.58621	1.30473	7.8876	-7.27236	0.659819	5.0427	-9.66548	6.69641	-4.93516	-9.41294	-0.537549	-5.07855	6.86369	-2.55872	8.51538	7.96087	1.32076	1.77839	6.87766	2.35091	-6.33943	0.453615	10.7053	0.114996
781	7.97326	1.34491	-8.97928	-10.6328	-7.8915	-6.90055	8.42787	6.00214	-9.64246	9.32787	-8.95346	-3.18842	2.07454	6.05191	-6.19075	10.4188	-7.35277	-7.29211	-9.71018	-9.32198	7.41957	-7.99422	4.93099	7.89589	-8.57379	4.52372	1.21266	7.50546	-4.49057	0.186244	4.82344	-10.114	6.6074	-6.13047	-9.33166	-0.547643	-5.18739	6.05433	-4.38905	3.63004	8.03559	1.08742	1.57283	6.20186	1.17428	-6.56587	4.43723	9.48674	0.119449
782	8.21325	1.38304	-7.77616	-10.6226	-7.82722	-8.40442	8.6231	5.21994	-9.64188	7.8285	-8.83906	-3.31927	2.48135	7.12253	-5.94688	10.1614	-7.49631	-6.72755	-8.12553	-9.98796	7.58646	-8.0057	4.59147	7.89554	-8.33239	5.09929	1.26282	5.999	-6.95699	3.53237	4.32749	-9.2306	6.9401	-3.6523	-9.42567	-0.545267	-6.15075	6.03903	-2.32569	4.91977	7.92298	0.411215	1.49486	3.54806	0.402717	-6.01244	1.45621	10.4967	0.116856
783	9.41914	-0.565897	-9.24451	-10.6023	-7.88198	-10.5485	8.39524	5.46649	-9.63756	8.88727	-9.05897	-3.70424	1.99391	3.85553	-6.27438	8.05471	-7.17189	-6.37209	-8.40028	-9.88549	7.36621	-11.8813	4.51379	7.89875	-8.06852	5.42475	1.29457	6.42413	-5.95657	1.1056	4.55156	-9.80236	6.80901	-3.43708	-9.40085	-0.53912	-6.2906	6.48825	-2.61352	4.08181	8.00857	1.40182	1.57552	3.34114	-4.84095	-5.67377	0.224278	7.98111	0.118945
784	10.0603	-0.815836	-9.81538	-10.6666	-7.84767	3.94921	8.56683	5.40496	8.17797	8.31889	-10.3657	-4.06965	2.17096	6.69901	-5.92251	7.34066	-7.48815	-6.27288	-9.71053	-7.59349	7.39243	-11.5556	4.75123	7.89454	-8.55269	5.86962	1.21372	7.67209	-6.59686	2.25726	4.48797	-9.94276	-8.05283	-4.15178	-9.34633	-0.522831	-4.98875	5.73545	-2.58108	5.32558	8.16676	0.608334	1.55122	6.58036	-4.78695	-6.50782	0.0826798	10.6625	0.120526
785	9.12547	1.37789	-10.077	-10.6488	-7.16805	3.09947	8.3921	5.93498	7.9592	9.3425	-9.03431	-4.95835	2.41236	4.74411	-6.32185	5.93736	-8.82348	-6.60408	-9.71031	-5.86189	7.55645	-12.1698	4.67241	7.8966	-8.18869	6.02848	0.273341	6.28005	-4.23716	1.61616	4.65989	-9.61118	-7.95408	-3.04766	-9.42573	-0.540707	-4.9653	5.32329	-4.62134	4.91012	8.42457	0.349999	1.4462	6.40627	-4.77439	-6.45091	0.781508	9.28858	0.121892
786	9.90563	0.58587	-8.09922	-10.5576	-7.87171	4.06774	8.59032	5.97408	8.01696	7.71809	-8.90841	-3.50536	2.31537	5.57653	-5.80916	6.13444	-7.78376	-6.00136	-9.15974	-5.34432	7.37279	-11.7312	10.6382	7.89615	-8.14185	4.83923	1.15739	5.90829	-7.35051	2.80418	4.85141	-9.78645	-8.54547	-3.44528	-9.33837	-0.550534	-6.39657	6.18778	-3.14676	5.84195	7.73439	4.76971	1.55778	4.41819	-4.78229	-5.53844	1.90479	8.7491	0.119143
787	8.84939	-0.685063	-9.78864	-10.6843	-7.82517	2.26311	8.34793	5.31027	8.44961	-0.556053	-9.53732	-3.68867	2.2955	7.21663	-6.18196	6.71679	-9.7951	2.52144	-9.7011	-6.60288	7.4177	-12.508	8.77828	7.89964	-8.54756	5.08451	1.08493	7.01492	-4.9895	-0.382048	4.96958	-9.97445	-8.3285	-3.57643	-9.40598	-0.554818	-4.92899	6.2862	-3.03392	4.14838	8.02376	5.60229	2.04009	4.62197	-4.81793	-6.10696	2.80178	9.15485	0.119369
788	9.77482	0.343678	-7.23236	-10.6392	-7.33286	3.82021	8.60931	5.31882	8.0956	-0.283436	-10.6972	-3.46346	1.99616	4.48971	-5.60183	5.90604	-7.77527	2.74196	-9.70009	-9.85889	7.51159	-11.8845	8.36224	7.89923	-8.50831	5.36985	0.369682	5.87038	-6.88372	1.24291	4.93357	-9.72926	-8.78345	-2.75657	-8.08693	-0.518671	-6.50119	5.83276	-4.18882	3.71549	7.94624	4.81656	2.13484	6.63842	-4.59556	-6.21672	3.97456	9.24692	0.121511
789	9.92464	1.40924	-9.97388	-10.5956	-7.71161	3.05835	8.51138	5.42903	8.03093	3.69306	-8.79508	-3.25918	2.18328	6.48873	-6.34235	8.9982	-7.34608	1.12306	-8.66253	-8.51139	7.57142	-12.3844	8.30922	7.89628	8.44138	4.97374	0.110408	6.85569	-6.86194	3.76007	4.63909	-9.60787	-8.20252	-3.1514	-6.5357	-0.538561	-5.0278	5.87955	-2.88856	4.99798	8.45475	4.7387	2.14034	4.20666	-5.32367	-6.67449	1.679	9.22416	0.118516
790	6.99395	-0.126962	-9.51003	5.70255	-7.86079	2.37923	8.53725	5.91097	7.85193	4.08458	-9.32622	-3.86328	2.31823	7.065	-5.3702	8.78649	-7.56042	2.45714	-9.41802	-9.90193	2.59082	-11.5418	9.38583	7.89446	6.98806	5.44482	1.28812	6.06921	-6.42371	0.0813172	4.36883	-9.77279	-8.66676	-3.54246	-7.08054	-0.500272	-6.61335	5.93911	-3.98338	4.30133	7.77708	4.66933	1.80898	2.84113	-5.24804	-6.45973	5.43814	10.2877	0.10515
791	8.44296	1.30856	-9.85908	4.85844	-7.24857	2.01433	8.50738	5.53864	8.43413	3.55925	-9.0945	-4.27336	2.40498	4.94705	-6.29209	7.46516	-7.22315	1.70546	-9.70271	-9.94774	3.48474	-12.3492	9.92598	7.89743	7.6447	6.02222	0.187633	6.94705	-7.06189	1.73343	4.52852	-9.90825	-8.95098	-2.81149	-7.92157	5.50944	-4.92259	6.96293	-3.81266	5.4495	8.18059	4.64083	1.94243	5.02882	-4.7087	-5.8785	0.605709	8.53247	0.10906
792	10.1124	-0.792436	-6.99962	5.72213	-7.59951	3.03887	8.66221	5.21752	7.94395	2.41639	-10.6583	-5.69362	2.02457	3.58053	-6.24897	6.14003	-8.61235	2.62267	-8.9173	-4.89521	3.62411	-12.2305	10.8018	7.89581	7.44645	5.62079	1.2572	6.25059	-4.744	2.44724	4.83979	-9.76235	-8.32596	-3.47342	-8.69986	5.65772	-6.66354	7.18327	-2.73117	5.99773	7.67226	4.70632	1.94349	5.28582	-5.1613	-6.63185	4.20244	9.34175	0.121971
793	9.62213	-0.37019	-8.29582	2.74226	-7.31171	3.56815	8.44852	5.83933	7.84205	3.5656	-9.00366	-7.32878	2.16219	-5.67271	-5.14582	8.22198	-7.21126	2.68028	-9.64423	-5.59821	0.946222	-12.006	8.37719	7.89857	7.04464	5.21052	0.0447226	4.98904	-6.25576	3.07317	4.86556	-9.52852	-8.88373	-2.96301	-6.14042	5.55184	-5.02597	5.38893	-3.64878	4.87072	7.72974	5.02314	2.06083	7.02517	-4.94233	-5.6846	1.2255	10.0082	0.119444
794	7.4539	1.35859	-10.0243	5.21922	-7.85768	2.50848	0.441896	5.65885	7.9064	3.90957	-9.65333	-5.8735	2.22842	-5.09815	-5.17536	9.31933	6.13183	1.4781	-9.70937	-7.11575	3.23174	-12.4655	10.1049	7.89633	8.79599	4.98424	-2.925	7.02992	-6.81803	6.60294	4.34984	-9.57555	-8.77084	-3.51542	-7.99605	5.83522	-3.87984	6.39265	-3.46093	3.78712	7.91388	4.98014	2.1361	7.14905	-4.50896	-6.20328	3.03399	8.32851	0.106494
795	8.6346	1.41731	-9.75459	2.47724	-7.79869	3.004	-0.225204	5.12931	8.23724	3.37657	-10.2595	-8.33953	2.35011	-4.29655	-5.98953	6.91733	6.09425	2.55128	-9.70864	-9.5933	1.24527	-11.6118	8.92409	7.89448	7.48849	5.58746	-3.14126	6.37356	-7.10825	7.51276	4.50227	-9.35604	-8.11683	-2.90148	-6.03253	5.47375	-5.13194	7.10553	-3.34711	3.87555	8.45264	4.93615	1.92089	6.84166	-5.04827	-6.73019	4.92124	10.5084	0.105655
796	10.0143	0.101998	-8.0767	4.39522	-7.31713	2.12005	0.128697	7.42925	8.45812	3.97793	-10.4787	-9.92901	2.21059	-4.5253	-5.1013	5.92177	6.17337	2.56276	-9.68661	-8.77903	2.62369	-11.642	9.55652	7.89189	7.42422	5.35512	-3.13739	6.42021	-5.44596	7.09557	4.45802	-9.74225	-8.9093	-3.55023	-7.36111	5.48881	-4.0217	6.75521	-3.32709	6.29263	8.18589	4.8945	2.02399	4.80964	-5.21449	-5.84028	0.275898	9.31608	0.12244
797	7.21936	1.33932	-9.64508	5.66219	-7.84664	3.69361	-0.748883	8.61268	8.23543	3.86823	-10.6602	-6.26664	2.47431	-4.81315	-6.16449	7.90527	6.10501	1.94936	2.292	-9.90704	4.19447	-11.9337	8.50558	7.89549	8.14534	5.36613	-2.91619	4.90966	-6.98764	7.04894	4.92875	-9.87418	-8.21923	-3.47388	-6.31103	5.60042	-5.76491	7.19459	-3.24959	5.092	7.70067	4.85854	2.21936	7.18049	-5.37806	-6.09853	0.152154	9.74111	0.10852
798	8.82409	-0.849839	-8.08151	5.71025	-7.48457	2.63656	-0.365498	8.40248	8.13226	4.19597	-9.13735	-8.96548	2.47928	-6.25417	-5.78327	6.32354	-10.2172	3.01258	1.9105	-7.80763	2.52987	-12.4903	8.39148	7.89734	7.20788	5.51124	-3.14658	5.11997	-7.07838	7.54	4.57649	-9.46764	-8.2147	-3.26427	-6.95352	5.69573	-4.17875	5.48532	-3.28251	4.5137	7.82826	5.08252	2.2256	7.27583	-5.37209	-5.99269	2.12313	9.18843	0.109949
799	9.90277	1.31799	-8.3745	2.99751	-1.72552	2.75203	-2.25875	8.158	8.40176	3.73656	-9.24204	-6.37637	2.44583	-5.96862	-5.5836	8.59692	-9.97974	2.8338	2.3364	-6.35105	0.0555765	-12.3322	9.06759	7.89643	8.10659	4.67988	-2.90625	6.36346	-6.92415	6.89579	4.70752	2.47843	-8.16367	-3.5043	-6.91826	5.4923	-4.90352	7.04619	-7.20307	4.83882	7.90803	4.37594	2.13318	7.35002	-5.16371	-5.55555	3.26303	8.16067	0.11095
800	9.41362	-0.150661	-8.31814	5.57974	-1.67495	2.15647	0.787542	8.49344	8.44955	4.19758	-1.6228	-8.10471	-10.064	-5.3779	-5.44846	7.59505	-10.1798	2.34397	2.10012	-9.94185	2.46962	-11.5564	8.25165	7.8954	6.9958	5.03626	-2.89618	6.92809	-7.08278	6.87065	5.04347	1.77607	-8.62191	-2.76259	-8.94765	5.85083	-5.74588	5.5991	-7.64131	5.57212	8.42292	4.40049	-3.08177	8.25562	-5.39364	-6.74084	1.00069	9.47059	0.112374
801	7.71907	1.41509	-9.80686	3.69069	-1.42165	3.45373	-0.0289725	7.92373	7.87994	3.84118	-1.91167	-5.58597	-10.711	-4.08614	-5.41337	9.48048	-10.214	2.65898	2.36682	-9.87889	2.56127	-12.3835	10.3013	7.89003	9.00202	5.9874	-3.11539	4.96102	-5.22098	7.18373	4.77828	1.33028	-8.08262	-2.77081	-6.09475	5.7289	-4.39543	6.34992	-7.43853	3.97228	-0.567182	5.13936	-3.10048	7.46711	-5.08282	-6.34455	5.16461	8.03012	0.116772
802	9.96163	1.35291	-8.66596	5.40759	-1.48018	2.84685	-2.51019	9.53026	8.37028	3.72017	-1.96004	-7.57171	-10.7624	-4.17062	-5.23222	6.30794	-10.1505	2.87674	1.89683	-10.023	0.347765	-12.3075	8.64118	7.89858	7.34663	4.3518	-3.12609	4.88695	-7.25236	7.4648	4.40128	-0.420349	-8.08122	-3.67519	-8.39476	5.49151	-4.60419	7.16269	-6.79542	4.79797	-0.88685	5.33096	-3.08685	8.52163	-5.3018	-5.85334	0.336494	8.98638	0.111589
803	9.69941	-2.03226	-9.48565	4.95743	-1.5432	2.14002	0.829361	7.32266	8.25943	3.94209	-1.64862	-5.93632	-10.7668	-3.78514	-7.26591	7.05991	-10.2362	2.64317	1.89527	-9.04301	3.81162	-12.0513	8.30248	7.89733	7.46938	5.97936	-2.88722	6.42516	-5.82969	6.99666	4.57562	0.458302	-8.48318	-3.36313	-7.16676	5.50835	-4.61103	5.59469	-7.49137	4.3411	-0.644252	4.34555	-3.09666	7.23084	-4.84506	-5.50048	0.187938	9.04977	0.113737
804	9.99274	-2.44968	-10.2127	3.90292	-1.3027	3.35306	-1.73872	8.69683	8.02108	2.57912	-1.77678	-6.45908	-10.606	-3.72003	-5.46022	5.92328	-10.1293	2.20529	1.95604	-7.36241	0.65123	-11.7124	10.4753	7.89935	8.18699	5.12132	-2.9638	5.10198	-6.99724	7.42019	4.97374	1.12701	-8.45942	-3.51161	-5.58568	5.66939	-4.77001	5.3251	-6.778	6.14282	-0.697447	4.31097	-3.08202	9.03774	-4.98033	-5.81084	2.34747	7.96849	-1.80617
805	9.86117	-1.73594	-7.54441	5.71846	-1.27192	2.92165	-0.261006	8.28199	7.92454	3.98744	-1.86624	-9.15544	-10.701	-4.13635	-6.92454	9.73158	-10.2178	2.59655	2.38243	-8.02544	2.77179	-12.4418	9.21898	7.89596	7.25041	4.98415	-2.95673	5.13491	-7.08994	7.38568	-4.71221	1.87325	-8.25882	-3.45871	-5.81861	5.49733	-4.24125	6.16958	-7.30612	5.21191	-0.853431	5.20056	-3.08208	7.82432	-5.06998	-6.60236	-4.31113	9.21439	-2.08404
806	10.1263	-2.01772	-10.2891	5.29315	-1.66377	2.13185	-2.3582	7.5092	8.26342	3.6266	-1.88485	-5.46642	-10.1571	-3.6155	-5.58446	8.40912	-10.0036	3.0919	1.91879	-6.10208	2.01428	-12.2175	9.74064	7.89615	7.91769	5.72285	-3.15697	6.64432	-5.64811	5.64593	-4.43899	-0.32938	-8.37418	-3.39257	-6.12722	5.53507	-4.79627	6.64942	-7.63176	4.7497	-0.741195	5.26885	-3.09462	7.24017	-5.2232	-1.25076	-4.57282	7.02582	-1.41196
807	9.033	-2.55052	-7.7839	3.47779	-1.37612	4.23913	-0.109364	7.28883	8.17848	4.08886	-1.65227	-10.1323	-10.7724	-4.29344	-7.13416	9.16189	-10.2233	1.27873	2.37899	-10.0462	4.67055	-11.7999	1.46225	6.06418	7.10211	-3.66758	-2.94801	5.20232	-7.03003	6.26931	-4.58764	0.354285	-8.28207	-2.80833	-7.80027	5.50397	-5.2251	-2.11373	-6.44192	4.67518	-0.931672	5.39698	-3.08403	7.22576	-4.9899	-1.18974	-4.40143	6.074	-1.38155
808	4.14658	-1.74464	-9.98054	4.6102	-1.74738	3.25973	-0.321203	8.55659	7.85783	4.11547	-1.68489	-6.24694	-10.0095	-3.69791	-5.7556	6.00766	-10.1838	2.72921	1.99994	-5.11251	4.376	-12.2702	0.692578	6.27435	7.14369	-3.88362	-2.93541	6.0306	-8.52121	6.83027	-4.53083	1.0448	-8.3207	-3.82454	-7.08706	5.50119	-4.43079	-2.93219	-6.98169	5.70658	-0.564975	4.60342	-3.07449	7.16518	-5.13809	-1.26733	-3.98942	8.47339	-2.13881
809	3.00432	-1.61338	-9.61462	1.95085	-1.63364	2.18907	0.195747	7.64206	7.93034	4.06026	-1.90839	-7.77049	-10.489	-3.88411	-6.44774	6.50364	-10.1092	2.3973	2.3609	-9.90472	2.89446	-11.589	1.52768	6.13962	8.23756	-3.4649	-2.84144	6.2219	-8.46076	7.44537	-4.84442	2.37658	-8.2841	-3.2189	-7.59592	5.51356	-5.19102	-3.58183	-7.7654	4.27765	-0.830014	4.56266	-3.09443	8.00985	-4.89683	-1.23619	-4.07724	8.77254	-1.83251
810	2.90453	-1.68419	-7.24977	5.51337	-1.651	3.02303	-2.12031	7.67533	8.31672	2.77045	-1.78644	-5.788	-10.5575	-3.6813	-5.88514	7.74598	-10.2423	2.35414	2.33391	-10.0909	2.68638	-12.1047	0.975779	6.44649	7.79496	-3.72561	-3.01544	5.42209	-8.5137	5.84804	-4.43496	0.267604	-8.24776	-2.78674	-6.98234	5.87108	-4.98485	-2.36902	-6.30715	4.87485	-0.548095	5.49637	-3.08067	7.24198	-5.04303	-1.21585	-4.21603	6.93456	-1.363
811	2.4797	-2.11316	-9.89198	5.72615	-1.33722	2.97541	-0.49778	9.34405	8.4196	4.00935	-1.88956	-8.57055	-10.7478	-4.10952	-6.67705	7.19384	-10.114	2.93171	2.0874	-10.1136	-0.248248	-12.3284	0.610344	7.39269	7.56117	-3.74333	-3.02771	5.6601	-8.49363	7.32635	-4.43102	-0.226175	-8.17124	-3.98603	-8.51923	5.8765	-5.15011	-2.2516	-7.818	3.66789	-0.921849	4.52124	-3.08233	7.61743	-5.09576	-1.21534	-4.6579	7.40184	-2.40164
812	2.92486	-1.91878	-7.33092	5.10018	-1.30114	3.16766	0.328177	8.83448	7.95635	3.84885	-1.62295	-6.07337	-10.7778	-4.04896	-11.0956	9.62712	-10.2299	3.08697	2.29338	-10.0846	2.37188	-12.0598	1.12327	6.76913	8.31793	-3.78838	-2.97632	5.0664	-8.52793	6.05122	-4.82479	0.955082	-8.20282	-3.28203	-6.73405	5.72785	-4.07179	-3.51462	-7.12479	-1.66253	-0.917072	5.53838	-3.07553	7.3094	-5.22297	-1.41547	-4.13633	8.32662	-1.33181
813	2.89682	-2.33574	-8.48208	4.75097	-1.73556	4.16673	-1.50813	8.04457	8.10655	3.17971	-1.78876	-7.0536	-10.2339	-3.70164	-10.8141	5.98451	-10.232	3.0175	2.04338	-9.99301	4.00302	-12.4078	1.56389	7.16742	7.39185	-3.32503	-2.99266	5.19443	-8.52814	7.34123	-4.74758	1.68853	-8.39701	-2.28217	-5.99071	5.50411	-5.24861	-3.5814	-7.80024	0.881221	-0.440606	5.45581	-3.10067	7.78785	-5.17791	-1.35202	-4.09558	8.9442	-1.424
814	2.53697	-1.78086	-7.23361	4.14338	-1.78522	2.14674	0.659212	9.70469	7.86836	3.84193	-1.8172	-6.19935	-10.2695	-4.23588	-11.1034	3.40816	-10.2181	2.46624	2.24029	-10.0538	1.78831	-0.156081	1.25908	5.92392	8.06378	-3.85124	-3.0072	5.83951	-8.48855	6.7636	-4.21706	2.1738	-8.23707	-5.18764	-9.16308	5.79428	-3.79193	-2.19257	-6.93488	-0.673917	-0.699093	4.47891	-3.08334	7.22324	-7.50614	-1.30562	-4.57233	5.85934	-1.28946
815	2.72996	-1.76466	-8.22603	5.72383	-1.36324	-2.35815	0.0429875	7.55997	1.45723	4.0784	-1.63105	-9.40165	-10.7589	-4.30926	-11.141	3.30993	-10.1121	2.37956	2.14079	-10.1228	3.38329	-1.50383	0.542589	6.18586	7.02783	-3.8077	-2.87619	5.29595	-8.52884	5.2611	-4.32505	-0.139473	10.1801	-4.41483	-8.2305	5.52438	-5.33211	-2.10218	-6.8819	-1.20082	-0.955205	5.57161	-3.10496	7.30189	-7.63103	-1.43041	-3.96812	8.55274	-1.4385
816	3.0511	-1.65685	-10.1434	5.53649	-1.43396	-2.15998	-0.292504	8.99077	1.24215	4.13653	-1.66091	-5.75637	-10.6798	-3.9875	-10.8364	2.63537	-10.1428	2.44523	2.18036	-10.0875	1.53488	-0.51434	0.821594	6.13222	8.60535	-3.40632	-3.08137	5.64212	-8.52399	6.67873	-4.67816	0.846714	10.2664	-2.73741	-5.7175	5.6036	-3.91394	-2.1704	-7.73813	-1.84138	-1.03623	4.43973	-3.07993	9.028	-7.17626	-1.47161	-4.28339	6.9034	-1.87944
817	2.76522	-1.96973	-8.041	5.0234	-1.52934	-2.01372	-1.01012	7.31057	1.20646	3.5232	-1.97387	-7.91988	-10.7369	-3.68753	-10.6774	2.37975	-10.2398	3.06582	2.12268	-10.0719	4.53354	-0.169468	1.37272	6.33927	8.00524	-3.90962	-2.88248	5.4797	-8.51202	7.5373	-4.79878	1.61005	9.73617	-2.1364	-6.00882	5.49102	-5.46185	-3.22671	-6.66404	0.393904	-0.92721	9.31756	-3.07768	7.68265	-7.51444	-1.60909	-4.44133	7.89345	-2.39971
818	2.43534	-2.23946	-8.93244	5.48184	-1.28961	-2.42276	-1.26017	7.57877	1.42061	2.97343	-1.67488	-8.75942	-9.58936	-3.66948	-10.8719	3.02824	-10.1997	4.45861	2.14594	-10.0648	2.2147	-1.49688	-9.04031	6.61089	7.34078	-3.97386	-3.09756	-9.05279	-8.52695	7.28513	-4.5634	2.2776	10.3941	-3.10423	-7.8955	5.74203	-3.7255	-2.65174	-6.80656	-0.832489	-0.4504	8.19612	-3.09107	8.93247	-7.83385	-1.33368	-4.48394	6.90428	-2.21362
819	3.75039	-2.71628	-7.32084	2.24512	-1.74291	-2.08904	-0.16959	8.6168	1.10508	4.11459	-1.63696	-5.99823	-10.7858	-4.16203	-11.0498	1.98663	-10.2048	4.40416	2.11479	-10.0489	3.04905	-1.54473	-8.32235	6.95488	6.97132	-3.50798	-3.03941	-9.0421	-4.82081	6.69847	-4.28094	-0.0392979	9.76303	-4.30225	-9.36883	5.38707	-5.59419	-3.63049	-7.30466	-1.02066	-0.634496	8.28346	-3.08889	7.42521	-7.07561	-1.24669	-4.00953	5.70373	-1.42807
820	2.29319	-1.89991	-7.52349	3.26234	-1.37537	-2.11009	-1.95482	8.59205	1.14528	-10.0545	-1.6495	-6.75491	-10.3891	-3.88023	-10.8175	1.60825	-10.2254	4.60631	2.08403	-9.99719	-0.533042	-0.432927	-8.79556	2.66087	1.82085	-3.56251	-2.86919	-9.05086	-4.91316	5.45863	-4.59132	0.75291	10.387	-5.53826	-9.07075	5.48239	-3.73943	-3.62463	-7.27666	-1.01666	-0.944791	9.60207	-3.10114	7.23252	-7.52033	-1.74855	-3.99157	8.5879	-2.35088
821	2.58382	-1.7617	-9.1759	-6.17419	-1.5848	-2.38477	0.574966	7.40198	1.39879	-10.0471	-1.61905	-6.32708	-10.72	-3.90778	-11.1061	2.67737	-10.1811	4.66877	2.05019	-10.1226	-4.18934	-0.162836	-8.98417	2.75817	5.69884	-3.48509	-3.05627	-9.05033	-5.15584	7.56749	-4.82356	1.52198	10.0628	-4.90719	-9.50194	-1.55369	-5.67623	-2.09436	-9.17844	0.633301	-1.07007	8.24294	-3.09176	7.3296	-7.72282	-1.19466	-4.67583	8.13303	-2.17979
822	3.1116	-1.63794	-9.28217	-5.10155	-1.37188	-2.4154	0.723299	7.61091	1.46272	-10.0645	-1.69524	-9.65265	-10.733	-4.27096	-10.8825	3.47027	-10.1784	4.33242	2.12507	-10.0776	-7.10637	-1.09636	-8.29349	3.6495	3.56332	-3.87457	-2.84995	-9.04953	-6.07611	6.47746	-4.21569	0.0632615	9.88228	-2.68432	-9.51708	-1.87511	-3.80111	-2.50065	-7.35527	-1.35005	-0.873916	8.99475	-3.09575	7.5629	-6.82188	-1.86904	-4.24089	9.16533	-1.9038
823	2.48537	-2.11393	-9.37317	-6.53922	-1.31523	-2.19938	0.878142	7.36174	1.06065	-10.0535	-1.61327	-10.1124	-10.7066	-4.01371	-10.9593	2.76884	-10.1996	4.41037	1.99112	-10.0689	-3.97004	-1.41966	-8.60019	3.3786	4.04488	-3.62098	-3.06831	-9.0487	-5.8172	7.19554	-4.61118	1.41861	10.2069	-4.0327	-9.5075	0.945494	-5.73335	-2.31016	-9.1097	-1.64351	-0.458571	9.85965	-3.09265	7.27269	-6.95393	-1.17913	-4.37401	9.85687	-1.50439
824	3.97135	-1.56574	-8.77329	-5.10177	-1.33453	-2.10801	0.244518	9.16589	1.19631	-10.0545	-1.74708	-10.4349	-9.8145	-4.06861	-10.5509	2.56419	-10.0442	4.48739	2.16276	-10.0844	-5.85488	-0.91607	-8.93024	4.66137	5.92011	-3.76309	-2.86115	-9.04683	-4.87746	6.65407	-4.77829	2.07675	9.60401	-2.63204	-8.92878	2.23585	-3.01858	-3.33132	-9.19399	-1.17703	-0.982964	8.42416	-3.08753	7.31353	-7.52486	-2.09081	-4.03264	6.33901	-1.21518
825	2.5753	-2.27238	-9.033	-5.00412	-1.77825	-2.45464	2.00787	7.49907	1.39766	-10.0353	-1.61851	-10.4238	-10.4932	-3.62953	-10.8663	2.2609	-10.2397	4.43192	2.14119	-10.0902	-7.13244	-0.182139	-9.02471	5.25483	2.00352	-3.35707	-5.07314	-9.05346	-5.12801	-0.570554	-4.52909	0.662779	10.554	-5.03982	-9.2583	-2.08992	-3.0278	-2.13168	-7.45399	0.179849	-0.819205	8.11187	-3.09247	8.76459	-7.94448	-2.04272	-4.21689	7.63586	-1.96496
826	2.8163	-1.65402	-7.7986	-6.35665	-1.55879	-2.15328	2.20901	7.79827	1.18802	-10.0461	-1.6382	-10.2817	-10.5714	-3.77579	-11.1111	3.21297	-10.2367	4.4288	2.2326	-10.0779	-4.60168	-1.13087	-9.05085	2.5112	5.23926	-3.65221	-2.82825	-9.03761	-4.87457	0.153541	-4.72596	0.162777	10.6216	-2.96338	-9.50738	-0.320788	-3.00853	-2.3039	-8.7483	-1.52006	-0.789349	7.80517	-3.08589	7.26562	-6.69893	-2.09409	-4.97631	8.65611	-2.24143
827	2.54492	-1.82797	0.859578	-6.4836	-1.41568	-2.32011	3.88995	1.18675	1.38685	-10.0321	-1.64061	-10.4207	-10.7752	-4.17389	-11.0307	1.42362	-10.2312	4.52071	1.94377	-9.95142	-5.57948	-0.630392	-8.36666	2.73021	4.29068	-3.68444	-6.69488	-9.04799	-6.0849	-1.16267	-4.71413	1.21956	9.61662	-4.17828	-9.51132	1.20507	-3.04559	-1.98822	-7.34773	-0.626052	-0.540577	7.96924	-3.09043	7.35022	-7.50759	-2.05418	-4.88115	6.85258	-1.13079
828	2.6965	-1.70138	1.52765	-6.02949	-1.26893	-2.49364	0.801184	-0.908377	1.4432	-3.69087	-1.63945	-10.2495	-10.5252	-3.77797	-11.1019	2.16027	-9.65391	4.71032	-2.59775	-10.0669	-6.84361	-1.5415	-8.43416	2.65887	5.48569	-3.29246	-4.87826	-9.04404	-5.68951	-0.307906	-4.81059	1.97712	9.51442	-2.87898	-8.88434	-1.7745	-3.11001	-2.19182	-8.93641	-1.42609	-0.965485	8.69542	-3.10015	5.58017	-8.27151	-1.9715	-4.6781	9.40445	-1.40066
829	3.51943	-1.79208	2.74539	-6.23854	-1.76837	-2.22642	1.97397	0.178212	1.07487	-3.37242	-1.67547	-10.4384	-10.7781	-3.70331	-10.8954	3.48599	-9.77777	4.37996	-0.291224	-10.0606	-3.40643	-0.558887	-8.53072	2.66718	4.60889	-3.82749	-8.2936	-9.05423	-4.85948	-0.93242	-4.29141	0.559437	10.4583	-4.78394	-9.51096	-0.856582	-3.19621	-2.32799	-7.71886	-1.9972	-1.00908	-2.38388	-3.08519	5.60439	-7.56112	-1.54923	-4.05707	6.79025	-2.29746
830	3.12352	-2.17851	1.5837	-5.29474	-2.77476	-2.24459	1.74686	-0.388568	1.26693	-4.10281	-1.66884	-10.3823	-10.7238	-4.28313	-11.0364	2.79223	-10.0424	4.5782	2.35501	-10.122	-6.42106	-0.191485	-8.81269	3.91116	4.46388	-3.53235	-6.86666	-8.99498	-5.09681	-0.687726	-4.55852	-0.408423	9.98575	-2.58434	-9.50842	2.50979	-3.28205	-3.40979	-7.74403	-0.697876	-0.766724	-2.37176	-3.09724	5.21678	-6.51808	-1.53942	-5.05611	5.61355	-2.02367
831	3.08496	-1.56425	2.59177	-6.34414	-2.83572	-2.49102	3.60571	0.0174077	1.25287	-5.86985	-8.26668	-10.3455	-3.42289	-3.6313	-11.0798	3.16782	-9.73175	4.30676	-3.34443	-10.1026	-6.69311	-0.209833	-9.0338	3.12632	5.00249	-3.38066	-8.40726	-8.99646	-5.20285	-0.441423	-4.84031	-0.664681	10.5165	-2.82957	-9.5124	-1.67043	-3.34783	-2.79182	-7.75387	-0.00603229	-0.620879	-2.38711	-1.82166	5.00733	-7.41832	-1.81987	-4.77779	6.9073	-2.38217
832	3.29729	-2.16449	2.03099	-5.84953	-2.66856	-2.48122	4.17346	-1.08619	1.32181	-4.25566	-8.28332	-10.4309	-2.69748	-4.13	-10.8733	3.28769	-9.8336	4.71756	0.585358	-10.0427	-6.14458	-1.10026	-8.82396	4.86721	2.03441	-3.7046	-2.56901	-8.94471	-6.01363	-0.0859473	-4.78938	-0.53041	9.6392	-2.52117	-9.52126	-2.0739	-3.44738	-3.43518	-7.47242	-1.85463	-4.88835	-2.37371	-1.78542	5.52902	-6.45581	-1.62199	-4.00401	9.65816	-1.41927
833	2.53142	-2.64514	1.58371	-6.46879	-2.73919	-2.33656	1.02798	-1.82051	1.33363	-3.70541	-8.24551	-10.241	-2.72198	-10.8357	-10.5696	2.50451	-10.2427	4.36107	-4.36597	-10.0983	-6.93931	-1.12748	-8.99813	2.48424	4.77671	-3.92762	-4.68452	-8.95214	-5.87169	-0.814607	-4.3506	-0.34915	10.3512	-3.85766	-8.85264	-0.58037	-3.53677	-2.25584	-7.58736	-0.668408	-4.40877	-2.38293	-1.60519	4.99619	-8.05431	-1.46465	-4.13088	6.59371	-1.67937
834	2.82252	-6.89205	1.01283	-6.54612	-2.8244	-2.34647	5.28095	1.44689	1.1785	-3.35687	-8.25509	-10.4256	-3.26481	-10.0484	-11.0865	1.03855	-9.59429	4.60061	2.07344	-10.0852	-3.76095	-1.30704	-8.98423	5.07734	1.80142	-3.59326	-5.48612	-8.52526	-4.82634	-1.04366	-4.75019	-0.196584	9.4845	-4.53421	-8.49483	-1.76567	-3.58024	-3.48375	-7.65914	1.30303	-3.70995	-2.38325	-1.8018	5.18652	-7.35958	-1.67989	-4.52152	8.58364	-1.42529
835	2.60201	-7.11436	0.70497	-5.80836	-2.82525	-2.10457	2.74111	2.51138	1.3975	-3.43897	-8.23502	-10.4018	-3.3042	-10.8066	-10.8379	2.908	-9.93977	4.48089	-1.46395	-10.117	-7.03746	-0.751467	-8.98509	2.75725	4.95367	-3.43594	-3.35515	-8.98806	-4.99067	9.48218	-4.79477	-0.62691	10.7411	-5.36546	-8.81565	1.46416	-3.65399	-3.09385	-7.68824	-1.76614	-4.68261	-2.3733	-1.58657	4.96251	-6.59476	-1.34309	-4.63205	6.86336	0.149242
836	3.0938	-8.11402	1.77284	-5.99381	-2.80826	-2.42714	1.46507	0.356562	1.40004	-3.97845	-8.20652	-10.3709	-2.7755	-10.8559	-11.0696	2.29669	-10.2357	4.30745	-0.589821	-10.0984	-3.11406	-0.238054	-8.87321	4.17479	1.90254	-3.89624	-7.03524	-8.81538	-5.97602	8.47373	-11.6293	-0.458494	10.725	-3.67422	-9.49033	0.426686	-3.70713	-2.25499	-8.14858	-0.357296	-4.5008	-2.38782	-1.81559	5.20351	-8.16561	-1.95339	-9.10755	7.19481	1.05673
837	2.70599	-7.18867	2.03131	-5.71492	-2.7004	-2.43994	1.20271	2.69918	1.42268	-5.63085	-8.21985	-10.3727	-3.33409	-10.8214	-10.8699	3.41376	-9.61769	4.55053	-3.11083	-10.1165	-3.30035	-1.18697	-8.8487	2.60188	5.33671	-3.94995	-7.23275	-8.99046	-5.90996	9.06323	-11.6158	-0.347458	9.83896	-2.8025	-9.51796	-2.0261	-2.98748	-2.15145	-8.11035	-0.866065	-3.81692	-2.39075	-1.77276	5.31494	-7.51804	-4.22717	-9.08267	-4.82932	0.0506597
838	2.52638	-7.93917	0.861918	-6.47728	-2.83498	-2.12117	0.909828	-1.97685	1.48675	-3.38683	-8.19024	-10.3907	-3.31383	-10.8533	-11.0841	2.90745	-10.0173	4.55956	2.24684	-10.025	-7.18195	-0.272314	-8.96798	2.66888	2.57549	-9.43484	-5.27944	-9.02312	-5.43193	8.32762	-11.6177	-0.60576	10.4896	-4.66339	-9.50315	-1.91287	-2.96416	-1.53102	-7.89587	-1.89602	-4.48839	-2.38354	-1.81883	5.06944	-7.50791	-8.03483	-9.06896	-3.76113	0.451681
839	-3.78102	-7.48995	2.80618	-6.43405	-2.71032	-2.42317	2.9891	-0.129978	1.31804	-3.65943	-8.17196	-10.436	-2.78637	-10.8157	-11.1006	1.81876	-10.1914	4.69326	1.37392	-10.0949	-4.95992	-1.07762	-8.97004	2.88903	5.15047	-6.65004	-3.09452	-9.00454	-4.9221	8.66618	-11.6116	-0.404755	9.68029	-2.41237	-9.51446	0.172301	-3.69864	0.259965	-8.03626	1.12208	-3.7417	-2.37652	-1.56012	5.25923	-7.47579	-7.91637	-9.01846	-5.81604	0.625303
840	-3.60463	-7.96497	1.95651	-4.82767	-2.80642	-2.02	2.75406	-0.467126	1.51309	-5.38781	-8.15676	-10.158	-3.29686	-9.28954	-10.8677	3.03855	-10.1264	4.36047	1.95301	-1.126	-6.89556	-0.316668	-8.90858	5.07845	2.81265	-4.51487	-5.66654	-8.95165	-5.27821	10.0931	-11.6112	-0.50548	9.94921	-3.47591	-9.06616	3.01977	-3.04464	-1.36899	-7.78694	-0.513665	-4.52931	-2.39143	-1.77788	5.04166	-7.30374	-4.28092	-9.11452	-2.58263	-0.0442475
841	-4.20569	-8.11922	0.919343	-6.44342	-2.82421	-2.33911	3.03382	1.70815	1.31516	-3.43606	-8.13684	-10.4445	-2.79304	-10.2829	-10.6962	1.21753	-9.83378	4.52353	-2.32597	-1.44805	-5.32076	-1.40163	-8.90569	2.424	5.6997	-4.76911	-7.78629	-9.00165	-5.67572	9.88883	-11.5491	-0.267274	10.56	-2.78382	-9.18797	-1.11543	-3.73491	-1.17127	-7.75543	-0.764544	-3.69019	-2.37486	-1.67933	5.0483	-8.37665	-7.47594	-9.02405	-0.520072	0.0690624
842	-3.88213	-7.30977	1.98585	-5.59361	-2.8379	-2.24223	1.35759	0.547608	1.3304	-3.39994	-8.09745	-10.3528	-2.7024	-8.8971	0.455618	2.43875	-9.90694	4.30967	-4.10121	-1.7316	-6.93299	-1.27028	-8.93559	4.84607	2.35106	-4.64114	-4.04365	-8.59007	-5.184	9.12289	-11.622	-0.582929	9.99993	-5.67658	-9.51113	2.77401	-3.07787	-0.643315	-7.75522	-6.7002	-4.34524	-2.39174	-1.80517	5.47445	-7.50777	-4.4654	-9.11677	-5.96511	0.307839
843	-4.08846	-8.09502	2.756	-6.49093	-2.6765	-2.49703	0.664198	2.82345	1.20242	-3.67771	-8.11949	-10.4551	-3.49571	-10.8345	-1.50676	3.34842	-10.2797	4.63582	0.295599	-1.93056	-3.55663	-1.10219	-8.94553	2.76613	2.18254	-4.81211	-7.42603	-8.97307	-4.8936	10.2136	-11.6107	-0.445367	10.1618	-8.4005	-9.06389	1.71576	-3.064	-0.44237	-8.5885	-7.65707	-3.68942	-2.38586	-1.65259	5.36362	-7.25663	-7.69145	-9.11515	-2.31406	0.00721719
844	-3.8546	-8.22514	1.55841	-6.51276	-2.82604	-1.98796	5.00459	-1.26411	1.16735	-3.36294	-8.07787	-10.3286	-3.5532	-9.02585	0.546061	3.13786	-9.83336	4.57555	-4.63373	-1.97881	-5.11614	-0.374861	-9.00672	4.42232	5.53213	-4.90095	-7.60171	-8.98669	-5.54807	8.84473	-11.2309	-0.664855	10.6854	-7.98751	-9.48707	-1.36833	-3.07849	-1.22244	-8.44637	-8.22369	-4.54776	-2.38297	-1.8075	5.23141	-7.50696	-7.23953	-9.09121	-2.0388	0.0992917
845	-3.70636	-7.83453	2.17301	-6.19478	-2.81031	-2.24288	3.1797	0.737489	1.29316	-3.55242	-8.27474	-10.4075	-3.25756	-10.7487	0.715751	5.07398	-9.85225	4.56322	-0.89244	-1.3997	-7.19967	-12.7985	-8.87589	2.68766	3.80727	-4.69303	-3.82869	-8.9653	-5.07275	10.238	-11.4206	-0.563804	9.81085	-8.57385	-8.66146	1.97834	-2.93219	-1.70215	-8.30069	-7.2896	-4.0002	-2.38099	-1.81435	5.41719	0.374488	-4.37419	-9.11136	-1.77772	0.207501
846	-3.78182	-8.42128	0.888177	-5.51152	-2.83663	-2.14935	2.46372	-2.103	-5.00042	-3.76061	-8.2904	-10.3783	-2.87555	-9.29783	-1.59155	6.97359	-10.1913	4.37818	1.79174	-1.76111	-4.40181	-12.8084	-8.84826	2.55326	5.95096	-5.26332	-5.85819	-8.94994	-5.00598	8.75366	-11.6181	-0.338078	-6.32693	-7.5612	-9.52307	0.686836	-3.06367	0.1839	-8.18534	-6.77009	-4.3367	-2.38688	-1.80927	5.03512	1.43077	-4.55716	-9.1085	-2.84646	0.0866089
847	-4.03823	-8.23153	1.47649	-5.3472	-2.82956	-2.23647	3.32594	-0.312492	-4.42113	-5.1407	-8.05387	-10.2649	-3.04843	-10.837	0.334274	6.24006	-9.94125	4.53751	0.00327799	-1.94855	-7.15046	-12.8091	-8.93207	2.71518	3.04999	-6.25071	-3.59901	-9.00339	-5.397	8.99686	-11.5076	-0.469178	-6.41424	-8.19353	-9.5452	-1.96246	-2.98274	-1.09729	-8.16843	-6.68916	-4.27656	-2.37912	-1.79693	5.24061	1.17258	-7.61155	-9.10932	-5.05757	0.824228
848	-3.73527	-7.02015	1.19811	-6.42893	-2.83851	-1.58567	1.74314	-0.58073	-4.27559	-3.49466	-8.0318	-10.2844	-3.12226	-10.7412	0.953203	5.33043	-9.55237	4.31597	1.12717	-1.9842	-3.19195	-12.8031	-8.94125	5.3221	5.84692	-4.61867	-6.04166	-8.96899	-4.9798	9.96859	-11.6167	-0.538616	-6.59644	-8.16941	-9.52653	-2.0027	-3.14074	-0.987284	-8.20509	-7.79674	-5.24968	-2.38132	-1.64237	5.10538	1.51498	-7.77076	-9.11448	-0.254202	-0.1303
849	-3.84564	-7.94304	2.08325	-6.45767	-2.83139	-1.73491	4.45223	1.98879	-4.30517	-3.88232	-8.28999	-10.4139	-2.73163	-10.7837	-0.961842	6.97476	-9.986	1.4662	-2.03809	-1.18196	-7.09942	-12.7717	-8.84332	2.7274	3.29665	-4.55878	-7.94956	-8.98205	-5.1998	9.72331	-11.5034	-0.318245	-6.10757	-8.37102	-2.45947	-1.56612	-3.09656	-0.884245	-8.17914	-8.41916	-3.85724	-2.38216	-1.81251	5.12543	1.30166	-4.67444	-9.08372	0.885194	3.45298
850	-4.17997	-8.61142	0.977855	-4.95112	-2.81216	-1.98657	2.50995	-1.44621	-4.34296	-4.89411	-8.01185	-10.2039	-3.1968	-10.8082	0.176828	4.87033	-9.90608	2.05814	-4.90299	-1.58643	-4.79197	-12.8095	-9.00742	2.459	5.82064	-4.92044	-6.24467	-8.87133	1.08681	9.82871	-11.3646	9.33041	-6.49459	-8.62912	-4.98124	-2.05227	-3.14713	-0.762194	-6.66185	-6.89179	-4.45371	-2.38142	-1.63165	5.56155	1.92506	-7.90782	-9.0515	-6.12198	4.31387
851	-4.22143	-7.17822	1.41185	-6.49988	-2.81796	-1.63015	1.20129	-0.237878	-4.94879	-3.35115	-8.29364	-10.4148	-2.97015	-10.8156	1.13034	5.85402	-9.27183	1.60382	-3.83547	-1.96692	-7.00117	-12.81	-8.98713	-1.77086	-7.14462	-4.60368	-4.48485	-8.8059	4.60562	9.31	-11.6151	5.88237	-6.46701	-7.95092	-2.59174	-0.0662799	-3.09264	0.285992	-6.60773	-6.83578	-4.24676	-2.37711	-1.71013	5.39884	0.612531	-4.7588	-9.10107	-3.95464	3.63618
852	-3.76024	-7.96371	0.959066	0.612706	-2.83878	-2.12936	4.72829	0.946628	-4.53679	-3.63128	-8.29024	-10.3601	-2.86543	-9.5211	-0.168248	5.26396	-9.77159	1.70816	1.60237	-1.7896	1.99489	-12.7903	-8.94515	-2.03827	-5.36593	-5.05902	-2.34778	-8.53099	4.32564	10.178	-11.479	6.81865	-6.5595	-8.13959	-5.5097	-0.465019	-3.10598	0.230723	-6.62353	-8.06674	-3.91828	-2.38846	-1.47164	5.08867	0.515386	-5.14845	-9.10851	-5.65457	3.54103
853	-3.55053	-8.24367	2.09482	0.746593	-2.81684	-1.9465	2.26424	-2.19801	-4.4348	-4.44345	-7.98813	-10.4427	-2.85073	-9.78709	-1.39307	6.63887	-9.49191	1.58878	-3.58425	-1.97662	1.91966	-12.8005	-8.85523	-4.17279	-3.97943	-4.77694	-8.13596	-8.98076	2.60881	10.1421	-11.6225	8.44244	-6.26362	-8.51237	-7.49721	-0.253897	-3.03412	-1.033	-6.68046	-8.61034	-5.2664	-2.37417	-1.73007	5.49667	1.52506	-8.01879	-9.03621	-4.37173	4.39373
854	-4.09208	-8.24446	1.44712	0.738801	-2.83828	-1.61095	0.526233	2.25633	-4.26776	-3.8141	-7.97126	0.726788	-3.14433	-10.816	0.0261983	5.16784	-9.96105	1.58295	-2.86295	-1.98619	1.36898	-12.8071	-8.93376	-3.90405	-1.6235	-6.01581	-6.45459	-8.99281	3.33942	8.38736	2.91453	9.13331	-6.11235	-8.31047	-5.25333	-0.363937	-3.08606	-0.539124	-5.64665	-7.0375	-4.30308	-2.38579	-1.4322	5.15501	0.977233	-4.91821	-9.02048	0.0257388	4.43161
855	-3.7958	-8.25815	1.38673	0.681042	-2.8322	-1.75755	1.54736	-1.63531	-4.68739	-3.34965	-8.28949	-2.30452	-3.05984	-10.8207	-2.05632	5.71326	-8.98449	1.69211	-1.17387	-1.23309	1.26847	-12.7992	-8.98002	-4.1927	-2.04833	-4.52557	-4.26092	-8.91948	0.990771	8.33873	0.115329	7.085	-6.32002	-7.92824	-2.76492	-0.125744	-4.27443	-0.00665026	-6.60589	-7.02552	-4.22271	-2.38204	-1.69413	5.17309	1.86433	-7.38298	-9.1155	-1.51394	4.42518
856	-3.77919	-8.56175	2.12612	0.629629	-2.82056	-2.28719	-3.77553	2.8694	-4.36395	-3.59798	-7.9484	0.740501	-3.24458	-9.07956	-0.681045	6.91001	-9.82864	1.43244	2.16633	-1.49285	1.83682	-12.7998	-8.86216	0.109784	-4.30086	-4.88523	-4.87728	-8.67712	4.50859	8.93402	1.09386	6.10617	-6.04409	-8.34466	-4.45156	-0.605399	-3.42876	-1.14741	-6.6033	-7.83715	-4.21904	-2.3859	-1.56963	5.14455	1.03378	-6.16892	-9.07957	-5.27611	3.87965
857	-3.66943	-8.14161	2.37454	0.56923	-2.83026	-2.21172	-5.07394	-0.728358	-4.34211	-4.6646	-8.28053	-2.47471	-3.13983	-10.8329	1.17835	6.38128	-9.30574	1.90408	0.859181	-1.81814	1.48881	-12.8019	-8.98449	-0.625979	-3.61389	-4.59117	-3.57594	-8.94564	2.40718	9.53335	0.406993	8.17364	-6.51433	-8.11222	-2.28039	-0.335087	-4.43791	-0.948365	-6.67609	-7.32219	-5.20576	-2.3866	-1.5238	5.62044	0.492179	-5.90959	-8.6121	-0.772724	3.37194
858	-3.93689	-7.21534	-1.01083	0.474654	-2.83939	-1.66331	-2.04616	-0.527601	-4.6213	-3.72796	-8.27644	-1.93388	-2.94341	-10.5201	-1.76272	4.77203	-10.1581	1.96652	-1.75131	-1.31877	1.7138	-12.7893	-8.9543	-3.05649	-1.47348	-4.71499	-5.64297	-8.66098	3.20154	9.65766	0.277949	8.9313	-6.50773	-8.54088	-4.19611	-0.0235987	-3.06843	-1.02378	-5.8723	-7.47079	-4.1813	-2.3737	-1.7664	5.60397	0.391831	-7.4863	-6.38765	-4.15105	4.41233
859	-3.65851	-6.9539	-1.17328	0.39438	-2.82262	-2.09075	-3.44758	0.326814	-4.2889	5.60794	-7.93527	0.718293	-2.95306	-8.77529	-0.108865	5.06457	3.15131	1.71028	6.67223	-1.54124	1.98753	-12.8086	-8.84902	-2.26912	-6.44228	-5.77352	-3.6185	-8.97385	4.38417	9.33512	0.617425	7.90608	-6.29569	-8.66316	-7.41234	-0.0950976	-4.63222	0.0873966	-6.48219	-7.92103	-4.13399	-2.38531	-1.74033	-1.39737	1.14481	-5.65216	-8.63983	-3.09827	3.37214
860	-3.61094	-7.1564	-1.87211	0.602038	-2.8329	-2.27195	-4.89361	-3.29949	-5.04098	6.15649	-7.91755	-2.12027	-3.03474	-10.8564	-0.396147	5.59241	3.20982	1.5373	8.32219	-1.84822	1.19258	-12.8064	-8.98372	-1.48697	-4.11118	-4.86323	-4.4856	-8.99312	1.42502	10.2304	2.11304	6.33353	-6.1617	-8.2771	-4.71624	-0.494839	-3.67211	-1.031	-6.56394	-8.81621	-4.10801	2.5845	-1.50237	-0.56183	1.77412	-5.39801	-6.61535	-6.28527	4.39181
861	-3.86736	-7.95559	-1.54094	0.635612	-7.08687	-1.79705	-4.7656	0.942589	-4.80936	5.73778	-8.26175	0.670552	-3.21059	-9.58382	-1.20659	5.50931	3.3168	1.84488	8.00509	-1.27795	1.81942	-12.8028	-8.9807	-4.25986	-6.99797	-4.53763	-3.55038	-2.52691	4.68551	9.14691	0.207576	7.35339	-6.50243	-7.90419	-2.30152	-0.274524	-5.85886	-0.961707	-6.56222	-6.72606	-5.07849	2.64752	-1.75714	-1.21402	1.63233	-6.92366	-8.69312	0.306477	4.39701
862	-4.09062	-8.1861	-1.72289	0.34706	-6.99739	-1.54835	-3.69881	0.831393	-4.37423	6.04619	-9.27552	0.645311	4.65678	-10.8422	1.11565	5.84549	3.12449	1.63714	5.67788	-1.62711	1.96099	-12.8006	-6.91889	-4.02434	-7.562	-6.45814	-4.97287	-1.92337	3.60974	10.0331	3.06255	8.69353	-6.17281	-8.45101	-6.96721	-0.380828	-3.56877	-0.34429	-6.11924	-6.68785	-1.02131	2.8377	-1.75113	-1.49982	0.890426	-7.07401	-8.43146	-3.33735	3.74404
863	-3.59481	-8.20421	-1.47098	0.62191	-7.26464	-1.61994	-4.11301	-2.21372	-4.33734	6.23103	-8.09636	-1.73119	4.5053	-10.8164	-1.88674	6.78099	2.84978	1.6089	7.79823	-1.99053	1.91285	-12.8041	-7.33068	-4.27251	-1.79014	-4.50229	-4.38995	-1.75565	4.2728	8.33931	0.0146281	7.62903	-6.58879	-8.25123	-2.36158	-0.628864	-5.89539	-1.22012	-6.33822	-7.17888	-0.833853	2.7325	-1.78614	-1.28245	1.87012	-6.71515	-6.86973	-5.47976	3.42661
864	-3.83598	-7.69594	-1.97516	0.363367	-7.4213	-1.8555	-2.25347	-0.926298	-5.06393	5.86777	-7.90017	0.645187	4.61717	-10.5486	-0.265105	4.7441	3.11714	1.667	6.81554	-1.98627	1.97212	-12.8087	-7.78705	0.195814	-2.5671	-4.66925	-5.07332	-2.45797	3.03559	8.49382	1.26306	6.56887	-6.05176	-7.81261	-3.68821	-0.00351692	-4.83641	-1.12176	-6.56029	-7.56667	-0.670227	2.803	-1.75422	-0.689355	0.777426	-4.10839	-8.63272	-4.59116	4.40011
865	-3.95615	-8.71105	-1.96722	0.610113	-7.47803	-2.18745	-5.47534	0.887136	-4.32439	5.58354	-7.70412	-1.50341	4.06495	-10.5612	0.964367	5.46042	3.28376	1.31845	5.87087	-1.66269	1.96196	-12.8035	-8.10984	-3.31533	-6.20249	-4.53051	-4.65434	-2.37398	4.6529	8.60024	2.81099	-8.75698	-6.1672	-8.07887	-6.34625	-0.525614	-3.7335	-0.213872	-6.67611	-0.00524725	-0.906943	2.41541	-1.42708	-0.984209	1.47345	-4.14446	-6.17521	-3.55962	4.39689
866	-3.98728	-7.68764	-1.03707	0.483455	-7.13505	-1.69724	-2.16238	0.604742	-5.0587	5.54958	-8.53244	-4.41271	4.23927	-10.6448	-1.65048	6.62695	2.47176	1.85289	5.62157	-1.90963	1.2111	-12.8083	-7.30878	-0.381887	-4.81477	-5.50769	-4.62301	-1.88711	1.25138	-0.278643	0.325265	-10.4167	-5.99802	-8.47871	-6.74299	-0.0743556	-5.04527	-1.1998	-5.30374	-0.569555	-0.71158	2.37666	-1.53005	-1.10983	1.63125	-4.16079	-8.74571	0.598223	4.12174
867	-3.87	-8.6679	-1.97811	0.615152	-7.47251	-2.04541	-5.51116	-3.11555	-4.73618	6.22668	-7.52101	-0.987694	4.65872	-10.56	-0.24441	4.71169	3.25826	1.39504	8.37095	-1.35771	1.45448	-12.803	-6.8209	-4.29392	-3.82843	-4.71274	-3.74184	-2.08776	3.46607	-4.10771	0.44593	-10.3838	-6.59458	-8.05227	-3.43272	-0.184911	-5.24694	-1.23374	-6.54074	0.544945	-0.534822	2.46124	-1.64606	-1.54536	1.29299	-6.46485	-8.93386	-1.2686	4.01924
868	-4.05321	-8.24699	-1.45716	0.41414	-7.18075	-1.82527	-4.27545	0.742214	-4.35466	5.8948	-9.29029	-1.25913	4.63085	-10.5247	0.175208	6.13357	3.131	2.09617	7.59488	-1.98397	1.26835	-12.8079	-7.70679	-2.52317	-3.09593	-4.7713	-5.20054	-2.2775	2.84576	-3.07255	0.709979	-6.34521	-6.26254	-7.7022	-2.22927	-0.0549359	-3.80564	-0.0919412	-6.50409	-0.278895	-1.12541	2.54521	-1.24221	-0.600341	0.615341	0.900254	-5.97375	3.3525	4.40833
869	-3.84249	-7.41187	-1.0136	0.707956	-7.27371	-1.56683	-3.85827	-0.184899	-4.35489	6.16293	-9.30716	-3.94862	4.53468	-7.24817	0.763631	6.42094	3.21075	1.40655	6.51548	-1.88749	1.72331	-12.8067	-7.39985	0.277761	-6.89338	-4.78505	-3.68391	-2.679	4.67181	-3.45388	1.89072	-8.48028	-6.45363	-8.59393	-3.93973	-0.208496	-3.26097	-4.64315	-6.44658	-0.831945	-0.430888	2.50516	-1.1443	-1.28307	0.272056	0.499584	-8.69335	-0.107715	4.28161
870	-9.61827	-8.68418	-1.44863	0.541274	-7.39818	-1.7197	-5.41987	-1.66275	-4.35682	5.69939	-8.30844	-0.711589	4.11317	-6.81366	-0.308933	5.39858	3.34345	1.58792	5.77031	-1.69601	1.4545	-12.7851	-6.72961	-4.10843	-5.91796	-8.51813	-5.31224	-1.73441	1.75181	-0.855647	3.05582	-10.28	-6.4722	-7.65455	-2.25452	-0.29127	-3.77634	-4.52655	-6.66291	0.276828	-0.831052	2.89602	-1.64256	-0.960415	0.74887	0.788241	-8.78795	2.67585	4.4113
871	-9.77872	-7.61387	-2.02984	0.465124	-6.94143	-2.25638	-5.27123	-2.946	-4.39546	-9.65898	-7.31753	-4.18873	4.67169	-5.71637	-1.69836	4.85104	2.59843	1.78144	7.41303	0.845238	1.70875	-12.7952	-7.23297	-3.55957	-5.09514	-8.69153	-4.56959	-2.60167	3.99699	-1.63532	3.03764	-6.60903	-5.97094	-8.42724	-6.54138	-0.405199	-3.87257	-5.90819	-6.54941	0.722607	-0.956659	2.20775	-1.73174	-0.828179	1.39952	0.436413	-8.73431	-0.651613	4.40617
872	-9.3565	-8.68589	-1.0472	0.455411	-7.00037	-1.63913	-3.96246	-0.362433	-5.0772	-9.49147	-9.33467	-0.428089	4.65302	-4.68121	-0.108869	5.59685	3.18466	1.71503	8.40066	0.653394	1.85712	-12.8088	-7.88692	-4.30025	-1.5534	-8.91198	-4.67276	-2.05635	4.6826	-2.37641	1.45316	-10.0177	-6.3862	-8.22399	-5.96362	-0.554105	-5.62035	-6.20321	-6.62138	0.671941	-0.965366	2.30085	-1.50197	-1.12291	1.56269	0.718191	-7.68292	1.65898	4.42578
873	-9.75636	-8.09956	-1.59332	0.613652	-7.26464	-1.91486	-2.3526	0.476375	-4.46493	-9.66087	-8.73069	-3.46908	4.56111	-6.42545	-11.1252	4.95222	3.11031	1.80577	8.37584	-0.279367	1.21602	-12.8034	-7.24663	-0.167031	-2.82315	-9.16177	-5.51371	-2.02263	1.59082	-0.462408	0.814238	-10.3848	-6.59905	-8	-2.95909	0.0140472	-5.74144	-5.57992	-6.64317	0.540996	-0.392327	3.02069	-1.37654	-1.11402	1.75366	0.495275	-7.41043	0.491515	4.42102
874	-9.73014	-8.66472	-1.50926	0.829001	-7.19673	-2.01234	-2.84102	0.176086	-4.86778	-9.66358	-7.09128	-0.16962	4.3507	-7.651	-11.0924	6.06547	3.38825	1.79662	8.00027	0.214323	1.61153	-12.7832	-8.05811	-1.18561	-1.38214	-8.60246	-3.92112	-2.59716	3.80069	-2.60269	0.375701	-10.3371	-6.63276	-5.69265	-2.13261	-0.238185	-3.8381	-5.93897	-6.45704	0.888918	-0.881773	2.09515	-2.00207	-0.978727	0.456571	0.737636	-8.73278	-1.96142	4.42048
875	-9.69389	-7.47374	-1.96128	0.44206	-7.47854	-2.16757	-4.88647	-2.49027	-4.36258	-9.60963	-9.06019	-3.70294	4.64588	-7.83306	-11.1388	5.31448	2.34091	2.12836	6.14552	0.870513	1.92378	-12.8085	-7.83901	-4.22297	-7.3554	-8.48428	-3.81952	-1.80209	4.5024	-0.660515	0.488893	-6.8523	-6.11037	-5.83651	-6.15832	-0.041043	-5.81789	-5.19334	-5.43263	0.79335	-0.548341	2.95246	-1.87182	-1.29492	6.3519	0.450032	-9.06832	2.89715	4.42993
876	-9.57125	-7.97647	-2.11315	0.543299	-7.46425	-1.89019	-4.67982	-0.715805	-4.4085	-9.68514	-6.84332	0.0747636	4.4361	-3.73898	-11.1115	7.02796	3.08845	1.32537	5.79113	0.686663	1.9556	-8.14932	-7.9648	-2.78418	-3.36635	-9.38436	-5.42504	-2.31401	4.37305	-3.33382	2.67133	-8.19549	-6.17628	-4.63347	-5.7474	-0.157045	-3.90126	-6.48858	-6.53994	0.59031	-0.444023	1.72946	-1.94437	-1.26563	6.6073	1.42799	-5.64542	3.10008	4.45281
877	-9.73824	-7.5908	-1.73298	0.790084	-6.91238	-2.04247	-2.50733	0.889915	-8.50146	-9.86573	-9.41109	-3.23785	4.67117	-7.1703	-11.1401	6.19689	2.21774	-2.02118	7.24579	-0.396257	1.57949	-8.30751	-7.2649	-4.118	-2.31387	-9.02245	-4.69104	-2.20118	2.16799	-1.67739	2.31832	-9.73974	-8.55934	-4.88636	-3.1742	0.0371304	-4.03847	-4.70239	-6.61502	0.605743	-1.29208	3.07904	-1.98679	-1.23754	6.32046	0.5481	-8.79159	1.37751	4.42874
878	-9.71538	-8.6937	-1.79911	0.817701	-6.99094	-3.37037	-4.47197	-1.15518	-7.13603	-9.65839	-9.50649	0.465242	4.58443	-6.92581	-11.0401	6.99404	3.42089	-1.17533	8.30672	0.158957	1.89722	-9.28947	-7.29071	-3.74864	-6.78218	-9.07361	-3.51054	-2.23788	4.62579	-1.37871	2.99222	-10.3916	-8.73131	-6.32552	-2.1928	-0.650761	-5.85218	-6.71443	-6.55728	0.862388	-2.23726	1.51045	-2.07118	-0.725913	6.60454	0.797173	-7.14005	-0.387556	4.3086
879	-9.75959	-8.51045	-1.52188	0.639504	-7.5312	-2.2723	-2.66765	0.945043	-7.9916	-9.46162	-6.62874	-3.02002	4.65732	-5.20113	-10.8925	6.0571	3.03211	-2.50178	6.33928	-0.522239	1.82247	-10.4446	-7.27127	-0.005564	-6.64967	-9.49399	-4.27434	-2.65142	4.19933	-1.60487	1.65865	-10.4258	-9.0474	-6.32223	-7.10777	-0.311414	-3.92583	-5.68833	-6.52134	0.538265	-0.937565	3.1674	-2.04127	-0.818502	6.35355	0.646999	-9.04768	-1.55347	4.42647
880	-9.77077	-7.51165	-2.02751	0.744821	-7.04354	-2.63058	-3.59628	0.627364	-8.31895	-9.96152	-8.89333	0.286259	4.15919	-7.46733	-10.9198	6.12137	2.07379	-2.2441	5.86712	-1.23749	1.76801	-10.9526	-7.09334	-4.23126	-4.54624	-9.07145	-5.57742	-1.67768	1.9565	-3.57607	0.344058	-7.91912	-8.86954	-5.70864	-6.02085	-0.435127	-5.85871	-4.74798	2.18544	0.527323	-0.685826	1.93374	-1.80851	-0.83183	6.45442	1.32157	-5.79602	2.18666	1.87538
881	-9.70471	-8.71734	-1.31512	0.818377	-7.34245	-2.10954	-4.74741	-2.97089	-8.49813	-9.66545	-6.43647	-2.64404	4.65958	-4.41791	-11.1307	7.19839	3.42755	-3.0363	8.0776	0.824228	1.35097	-9.72098	-7.93227	-0.899421	-5.64172	-9.15714	-4.72806	-1.80461	-0.408953	0.0380105	0.946535	-7.05877	-8.66595	-6.10206	-5.22249	-0.584128	-4.13945	-5.55911	1.4803	0.923602	-0.575292	1.17385	-2.19451	-0.755218	6.36373	0.951806	-9.13753	2.43397	3.32961
882	-9.40053	-8.66298	-1.61179	0.787732	-7.38159	-4.09497	-5.50488	0.771307	-8.49578	-9.64671	-9.59443	0.59618	4.39013	-3.20951	-11.1131	6.05933	2.95311	-1.90025	7.09282	0.108293	1.58686	-8.1909	-7.24755	5.35023	-8.88268	-9.4844	-4.80123	-2.40413	-2.09388	-1.56157	0.54334	-10.3012	-8.60617	-5.57499	-6.50261	-0.226025	-5.85615	-6.07965	2.03044	0.930079	-2.39621	2.85496	-1.84217	-0.858277	6.30918	1.16672	-8.21387	1.93044	1.91754
883	-9.78648	-7.40323	-1.65109	-3.93601	-7.47109	-2.06813	-4.84365	-1.40188	-6.96408	-9.82492	-9.22788	-2.81539	4.66331	-5.42037	-11.1211	6.17447	3.11621	-2.5754	8.16314	0.622132	1.59452	-10.1818	-7.62615	-5.04417	-8.88811	-9.27889	-5.64337	-2.48581	2.81394	-1.65439	2.50649	-9.48987	-8.83119	-4.95955	-5.59293	8.34346	-3.96581	-6.09712	1.62685	0.793259	-0.909249	1.30192	-1.94151	-1.54336	6.32905	1.01408	-8.93398	-0.90273	2.80465
884	-9.75102	-7.83327	-1.08991	-3.08997	-6.9215	-3.0524	-3.04396	-0.0463541	-8.37234	-9.66333	-6.22648	0.68977	4.29176	-6.8787	-11.1154	6.91147	1.92374	-1.66916	5.73277	-0.639495	1.63729	-8.7291	-7.92176	-5.58362	-8.87789	-9.47176	-4.158	-1.73355	2.89995	-1.23188	3.07428	-10.3798	-9.00359	-6.288	-7.25782	8.50789	-5.84982	-4.99336	1.78674	0.515664	-0.602438	2.84874	-1.84189	-0.763464	6.58121	1.07884	-8.7194	-1.75775	2.97821
885	-9.7746	-8.71593	-1.85231	-2.71025	-6.93207	-2.93284	-3.25595	-2.73588	-7.62048	-9.95771	-9.268	-10.4072	4.59785	-7.09297	-11.1348	6.35494	3.40985	-3.55703	5.9423	-1.11581	1.53949	-8.4412	-7.16944	-8.90498	-8.86416	-9.42201	-4.03459	-1.86533	1.77981	-1.95212	-11.0084	-7.23407	-8.83198	-6.23385	-5.75393	8.30724	-9.25325	-6.13752	1.90549	0.645618	-1.67518	2.86929	-1.93558	-0.662129	6.48547	1.25525	-7.9563	0.783635	2.04758
886	-9.62133	-7.5234	-1.19002	-4.30232	-6.96782	-2.53374	-4.75192	-2.91283	-8.30381	-9.66054	-9.66564	-10.3991	4.65031	-4.19622	-11.0988	7.26765	2.73125	-2.50512	8.2436	0.85703	1.60837	-10.4799	-7.34063	-4.80676	-8.8795	-9.4522	-5.62113	-2.12502	3.2924	-3.73294	-10.8128	-10.3262	-8.99946	-5.98808	-6.1675	8.40874	-9.2365	-6.6873	2.11785	0.931888	-1.87376	2.873	-1.3689	-0.536596	6.60573	1.65036	-8.80147	3.46623	3.16042
887	-9.75959	-8.69379	-1.74314	-3.32764	-7.52228	-2.07196	-9.95957	0.0705503	-8.76605	-9.65681	-9.26214	-10.3993	4.01546	-7.35479	-10.9898	6.09952	1.76431	-2.3849	6.95434	0.566811	1.63618	-8.62104	-7.48675	-6.23858	-8.38515	-9.42645	-6.0258	-2.62661	-0.175526	-2.7833	-11.1439	-10.4002	-8.54714	-5.437	-7.13234	8.51466	-9.25689	-5.3658	1.93677	0.806636	-0.750377	1.12661	-1.3585	-0.719516	6.3794	1.27656	-8.73023	0.194776	2.91684
888	-9.60119	-7.74285	-1.32662	-2.68184	-7.33487	-3.84232	-9.89762	-1.93547	-8.59383	-9.66935	-9.71374	-10.4043	4.47448	-3.48145	-10.8866	6.78727	3.01171	-3.33369	8.17939	0.788068	1.60307	-8.1492	-7.90295	-8.05461	-8.32787	-9.4329	-4.84491	-1.7431	-1.86328	-3.20144	-11.007	-7.43822	-9.08177	-4.79147	-6.94322	8.30863	-9.37097	-6.27278	1.74379	0.612026	-0.806243	1.03642	-1.34304	-0.76344	6.6328	1.52506	9.1026	-1.13205	2.73862
889	-9.7265	-8.38303	-3.45482	-2.96217	-7.44565	-2.23972	-9.89821	-3.66657	-6.85525	-9.69827	-6.011	-10.3493	3.97153	-6.25568	-10.9332	7.28269	3.36989	-2.01625	5.6692	0.0534384	1.49401	-9.43215	-7.0045	-7.22046	-8.41727	-9.42358	-4.78752	-2.55358	3.14962	-0.104499	-11.1509	-9.26116	-8.8601	-4.26364	-5.24572	8.60293	-9.23576	-5.60983	1.80238	0.88537	-1.47845	2.86527	-1.68219	-0.564392	6.65919	1.2546	9.23511	-1.35418	2.52454
890	-9.77329	-8.67585	-3.27079	-4.01767	-7.11987	-2.18095	-9.88028	-3.78855	-8.5333	-9.65819	-9.25587	-10.36	4.65922	-7.71589	-11.1045	6.26329	5.20778	-2.48766	-3.73736	0.51855	1.57891	-9.13408	-7.32749	-6.86217	-8.28564	-9.43501	-6.18657	-1.94158	2.06857	-1.48763	-10.9664	-10.2883	-8.79801	-6.19906	-7.18432	8.51698	-9.25799	-4.54262	2.23486	0.639356	-0.465279	1.0824	-1.82549	-5.38689	6.29773	1.18742	8.75375	3.23773	2.8899
891	-9.5241	-8.70458	-3.41038	-3.86758	-7.11431	-2.02296	-9.86334	-4.4715	-8.96088	-9.69868	-9.26601	-10.382	4.65118	-6.56631	-11.2549	7.26903	5.52016	-1.52636	-2.45995	0.802178	1.57431	-8.48132	-7.56138	-5.03314	-8.36557	-9.42981	-4.73756	-1.6786	-0.811799	-2.92653	-10.9494	-10.417	-8.91797	-6.15842	-6.78934	8.31177	-9.23859	-6.39194	2.15584	0.675669	-2.06002	-8.27131	-1.4635	-5.71179	6.5027	0.925211	8.93552	1.07919	3.46484
892	-9.77188	-7.40981	-3.50879	-3.77906	-0.783417	-2.11515	-9.93493	-4.07771	-7.86793	-9.5139	-9.2595	-10.4036	4.20342	-4.95002	-11.2474	6.52553	5.21091	-2.47883	-2.83973	-0.0956934	1.54629	-10.7174	-7.9224	-5.36564	-8.2872	-9.43936	-5.77678	0.0157035	3.1262	-1.66229	-11.2587	-10.4169	-8.54313	-5.32352	-5.19039	8.24137	-9.38169	-6.50018	1.72491	0.929396	-1.00857	-8.12186	-1.57433	-4.95527	6.29704	0.725593	9.24275	-3.0072	2.18511
893	-9.74185	-7.53381	-3.47753	-2.74786	1.89659	-2.45079	-9.81537	-4.44993	-8.85153	-9.91134	-8.32875	-10.4079	-1.81315	-6.7028	-11.0271	6.49637	5.1545	-1.09959	-3.64131	0.455578	1.59588	-11.783	-1.28998	-8.94706	-8.19061	-9.42352	-4.69566	-0.450405	1.23225	-3.92051	-11.1862	-9.02053	-8.79324	-6.26577	-7.00391	8.25209	-9.23836	-5.80785	2.3411	0.54344	-8.244	-7.57047	0.584755	-4.84647	6.50268	0.801189	9.18536	-3.14187	3.54357
894	-9.77304	-7.52157	-3.48221	-2.85818	1.63782	-4.61496	-9.83144	-3.76784	-8.63786	-9.4921	-9.24954	-10.3951	-2.07451	-7.02101	-11.2441	6.03805	5.43362	-3.45199	-2.99572	-0.978693	1.61289	-9.89433	-1.28403	-6.06559	-8.1476	-9.43248	-5.90368	-1.71185	-2.33423	-2.15924	-11.0686	-7.66338	-9.06567	-5.29974	-6.90281	8.30593	-9.25998	-5.81054	1.23304	0.614402	-7.79435	-7.67508	0.601871	-5.36312	6.5894	0.919603	9.28807	-2.71007	1.84584
895	-9.77632	-8.6083	-3.72	-3.4738	-0.511179	-2.36708	-9.91584	-3.95177	-8.46249	-9.6596	-10.0233	-10.4082	-2.00115	-3.97819	-11.2289	6.67281	5.40841	-1.38893	-2.49746	0.74492	1.59855	-11.2629	-1.29719	-4.61824	-8.40995	-9.35216	-4.63692	0.0200012	2.33709	-1.05676	-10.969	-10.318	-9.07924	-6.06326	-5.20091	8.22934	-9.23844	-6.00221	1.76499	0.754583	-7.70736	-7.79015	0.586982	-5.04548	6.52671	1.05919	9.21787	-2.9584	3.00321
896	-9.75511	-2.76296	-3.09966	-3.15652	0.652154	-3.59771	-9.99818	-3.674	-8.28739	-9.65943	-10.1493	-10.4023	-1.8291	-6.00814	-11.0664	7.24221	5.25873	-2.87166	-2.70259	-0.885277	1.62375	-8.20255	-1.29008	-8.28307	-8.24966	-9.3879	-5.81275	0.0831979	-0.630335	-6.33287	-10.6031	-8.51126	-8.62378	-5.13951	-5.3577	8.42136	-9.26324	-6.6112	1.35081	0.550069	-8.27495	-7.83497	0.525236	-5.80884	6.61319	0.772291	9.04019	-2.41455	3.05681
897	-9.43791	-1.71056	-3.17891	-4.09741	2.26847	-2.04223	-9.92109	-4.38602	-8.26474	-9.67689	-7.44609	-10.3787	-1.89148	-7.56632	-10.9942	6.37842	5.97545	-1.9718	-2.44352	0.372332	1.55389	-9.58972	-1.28679	-7.42594	-8.13357	-9.45115	-5.26799	-1.34097	2.98878	-3.26609	-11.0986	-8.44329	-8.76838	-6.30754	-6.71064	8.31495	-9.24252	-5.49537	2.16623	0.758609	-7.7025	-8.03254	0.415746	-5.01278	6.43214	1.18031	9.1216	-2.12972	2.32567
898	-9.76579	-2.5553	-2.98401	-2.89457	0.398031	-2.82308	-9.94604	-3.83336	-8.40925	-9.66033	-10.7781	-10.4058	-2.0453	-7.75628	-11.2429	6.07026	5.1319	-2.47454	-2.89814	-0.0128583	1.63756	-8.22732	-1.29714	-7.03049	-8.26272	-9.44049	-5.16015	-0.143537	1.51905	-3.01758	-11.0748	-8.39953	-8.58107	-4.36899	-5.45709	8.40257	-9.2733	-4.46451	2.455	0.714961	-8.24095	-7.69967	0.508988	-5.41027	6.33482	0.633947	9.31733	-1.85703	1.67068
899	-9.53387	-2.92378	-3.61677	-3.40063	1.94529	-2.21316	-9.8789	-3.87123	-7.7705	-9.70763	-10.3116	-10.3933	-2.10266	-6.94447	-11.2423	7.1976	6.31631	-2.02823	-3.00371	-0.176946	1.50089	-10.238	-1.29024	-4.69134	-8.42092	-9.4354	-5.05566	0.0455225	2.63554	-6.64475	-11.1855	-8.36039	-9.0963	-5.1606	-7.29294	8.70736	-9.23799	-6.32043	2.07675	0.626492	-7.82167	-7.94335	0.563871	-5.89645	6.24902	4.57793	9.30358	-1.5887	2.48961
900	-9.76301	-1.68598	-3.54824	-2.82147	-1.02342	-2.14602	-9.96902	-3.92688	-8.69812	-9.77173	-9.75179	-10.3491	-1.89078	5.37225	-11.1641	6.5997	6.20261	-2.70743	-2.80737	0.279444	1.56358	-8.27443	-1.28556	-5.15526	-7.82822	-9.43357	-6.32887	-0.550266	-1.19343	-6.53546	-10.9561	-8.43069	-9.07645	-5.85866	-5.13794	8.68211	-9.29456	-5.08921	2.55376	0.798719	-7.81231	-7.84509	0.530025	-5.49032	6.53533	4.71202	9.33549	-1.32349	3.51314
901	-1.15108	-2.92774	-3.47321	-2.99443	1.68031	-2.03405	-10.3883	-4.2804	-8.49909	-9.56258	-10.4526	-10.3984	-1.817	5.02617	-11.0167	6.07199	5.71467	-2.4584	-4.03128	-0.770287	1.60394	-10.6914	-1.29015	-5.91619	-8.20825	-9.42706	-4.97773	0.0435789	3.30568	-3.65167	-11.4333	-8.48866	-8.90813	-5.01933	-7.23025	8.62024	-9.24182	-4.65256	2.62615	0.832754	-7.82163	-7.69064	0.592669	-5.28326	6.4256	4.59593	9.29562	-0.762616	3.07659
902	-0.529162	-2.35051	-3.33021	-2.613	1.49069	-2.27551	-9.98962	-4.05844	-8.22299	0.686496	-10.7445	-10.4045	-2.13555	5.40216	-11.2184	6.83098	5.31802	-2.0265	-2.43927	-4.93199	1.51579	-8.85757	-1.2853	-6.65798	-8.02343	-8.38054	-4.91033	-1.90848	0.672136	-3.46331	-10.2116	-8.51443	-8.92855	-4.48984	-7.2598	8.49533	-9.31685	-4.9067	1.96363	4.46951	-7.7421	-8.0271	0.555105	-5.06129	6.25185	3.70783	8.51434	-1.04796	2.77178
903	-0.30236	-1.84455	-3.37731	-3.62084	0.909192	-2.72441	-9.96029	-4.1638	-7.32556	1.83624	-8.14383	-10.4033	-1.91353	5.02869	-11.2414	7.1211	5.62938	-1.26715	-3.54178	-5.58262	1.61809	-10.9651	-1.29359	-4.72579	-8.65211	-9.12337	-5.59773	0.067595	-1.00006	-6.6684	-10.4655	-8.4864	-8.97259	-5.95329	-5.2876	8.61889	-9.24582	-4.29164	2.6428	4.66083	-8.12491	-8.38465	0.502582	-5.13469	6.50713	3.74817	8.72782	-0.456543	1.75999
904	1.17028	-2.67111	-3.26229	-4.16628	2.0644	-4.35192	-9.80999	-3.88921	-8.48238	2.59357	-9.10741	-10.3479	-2.10771	5.64902	-11.0444	6.67412	5.78285	-1.7961	-3.41406	-5.13484	1.6009	-9.98918	-1.2894	-7.62478	-8.42255	-9.43184	-4.63114	-2.59725	3.22798	-2.24624	-10.1664	-8.2797	-8.7421	-5.51409	-6.32144	8.60423	-9.24091	-5.07216	1.84562	3.92443	-8.05809	-7.63053	0.503941	-5.07884	6.30877	4.77459	8.41275	-0.151396	2.52603
905	-1.13712	-2.95448	-3.3856	-3.26108	1.84646	-3.19769	-9.92425	-4.17368	-8.58188	1.0134	-7.33424	-10.4043	-2.02843	5.3667	-11.1571	6.07356	5.20403	-2.08772	-2.71725	-5.33226	1.65118	-9.00177	-1.28985	-4.89441	-6.15604	-9.40862	-4.57151	-0.984898	0.964455	-5.6341	-10.3988	-8.29436	-8.99928	-3.4389	-6.94016	8.52814	-9.33365	-4.5791	2.59583	4.90388	-7.58836	-7.94478	1.15737	-5.34605	6.65443	4.40594	8.67907	-3.13063	3.04777
906	1.75406	-2.86163	-3.30375	-3.03825	-0.292954	-2.18582	-9.95626	-4.18944	-7.47851	-0.559972	-8.98303	-10.4075	-2.05056	5.3681	-11.2419	7.10942	5.28276	-2.45803	-2.46601	-5.32516	1.64746	-11.5366	-1.29496	-4.95855	-5.60921	-8.59446	-5.65399	-0.138399	-1.62938	-2.76464	-10.3277	-8.30909	-8.67737	-3.85384	-5.89359	8.4158	-9.24373	-4.47888	2.06693	4.29721	-7.76249	-8.21565	-0.376294	-5.20665	-9.16451	3.71513	8.86142	0.150034	2.04871
907	-1.1337	-1.67051	-3.81416	-2.93243	2.205	-2.31589	-10.2323	-4.26322	-8.13878	3.10605	-7.96224	-10.3768	-2.09355	5.58857	-11.2387	-8.99372	5.36144	0.85313	-3.43359	-5.29252	1.48267	-3.79391	-1.29063	-8.78975	-4.85818	-9.38947	-5.3822	0.0663613	3.37213	-5.89197	-10.3216	-8.32296	-8.94895	-3.37073	-9.53608	8.65454	-9.3505	-4.60744	2.15804	5.26046	-7.98512	-8.51374	-0.274532	-5.54576	-5.64571	4.71105	8.55374	-3.10487	2.66213
908	1.73553	-1.78183	-3.81702	-2.78449	1.99652	-3.66311	-10.3697	-4.15653	-4.02756	-2.04046	-9.88851	-10.4039	-2.08369	5.02194	-11.1005	-8.90449	6.43773	2.86748	-3.19825	-6.01475	1.63279	-5.52203	-1.2957	-5.74818	-6.76038	-9.39907	-5.50137	-2.12173	0.116398	-6.1166	-10.4435	-8.32537	-1.78078	-3.90569	-9.54733	8.67349	-9.24298	-5.06846	2.48885	4.45796	-8.13133	-8.13382	-0.215237	-5.63014	-5.38358	4.34163	9.08669	0.979889	2.99071
909	-1.22131	-2.20158	-3.79288	-4.24518	1.11303	-4.28403	-9.88317	-3.875	-3.54486	-2.75566	-7.21433	-10.4069	-2.09865	5.26968	-11.1152	-8.97046	5.3485	1.24655	-3.97976	-7.03688	1.52647	-2.56221	-1.29393	-6.43866	-4.83955	-8.45991	-4.53814	-0.826155	3.3444	-2.51076	-10.5173	-8.29508	-2.83161	-2.99923	-9.54889	8.33286	-9.36142	-4.52971	2.19143	4.59785	-7.95491	-7.43191	0.790298	-5.45008	-8.12907	3.82445	8.38549	-3.06887	1.72355
910	0.723293	-1.67506	-3.64727	-3.70076	1.79299	-2.97163	-9.91961	-4.33393	-4.72643	0.470853	-10.5731	-10.1839	-2.025	5.24723	-11.2343	-8.90794	5.4437	1.54832	-3.3221	-5.30706	1.605	-5.1103	-1.28763	-4.93121	-7.13097	-8.60821	-5.8964	-0.198267	-1.41493	-5.10443	-10.0604	-8.28084	-1.90841	-4.02347	-9.21928	8.6108	-9.24366	-4.40213	2.3456	4.62231	-7.77933	-8.52699	0.95627	-4.45922	-9.35255	3.74082	8.30516	0.443294	2.27613
911	0.197975	-2.84642	-3.7733	-3.20748	2.29555	-3.70947	-9.97538	-3.86655	-4.50768	2.00625	-10.6944	-10.1544	-2.019	4.97661	-11.1918	-9.0565	5.23835	0.822341	-2.63337	-5.05604	1.58834	-2.69532	-1.29292	-4.69336	-5.40129	-8.34367	-5.83112	-1.16356	0.387924	-4.62929	-10.1754	-8.9966	-2.72986	-3.26485	-9.53887	8.66458	-9.35923	-5.02221	-4.79181	5.04394	-7.80131	-8.20447	0.593011	-5.47639	-6.52492	4.23147	8.91328	-3.01809	5.17464
912	1.76195	-1.74468	-3.80229	-3.53913	-0.0663251	-4.33176	-9.82898	-4.17115	-3.4586	2.75438	-9.63659	-10.3274	-2.12054	5.59628	-11.2323	-7.24537	5.19117	1.33236	-3.21341	-7.26432	1.64389	-3.66065	-1.28968	-7.84282	-7.49522	-8.61872	-4.5815	-0.0481208	-8.50807	-1.09792	-10.0416	-8.87481	-1.52505	-3.5677	-9.5393	8.40004	-9.24982	-4.25984	-4.76666	4.34983	-7.89993	-8.2489	0.0216952	-5.46266	-10.2001	4.78358	8.33472	0.721383	5.33514
913	-1.0639	-2.50959	-3.59925	-2.64679	-1.41947	-3.82879	-9.92686	-3.83534	-3.25626	0.864705	-10.6489	-10.3809	-1.87996	5.2189	-11.2233	-7.18703	5.12195	1.59797	-2.59406	-5.26199	1.58532	-2.63532	-1.28533	-10.3771	-6.49263	-9.36414	-5.77808	-2.84039	-8.43142	-5.3606	-10.5597	-7.48865	-3.01686	-3.00183	-9.21038	8.69551	-9.36122	-5.01618	-7.14005	4.17304	-7.84382	-8.49917	0.199206	-5.43027	-10.4708	4.46918	8.33144	-3.03131	5.00764
914	1.70157	-2.72319	-3.56441	-6.59021	2.1917	-4.44264	-9.92951	-4.36851	-3.8197	-0.843677	-7.82037	-10.3758	-1.86947	5.24584	-11.2476	-7.54976	5.66892	1.2818	-3.91209	-5.3411	-3.09317	-7.03124	-1.29352	-10.406	-4.91658	-8.68658	-4.51055	-0.354909	-8.52266	-4.86917	-10.3141	-8.73471	-1.6664	-3.06927	-9.54992	-5.56814	-9.24287	-4.36362	-4.77381	5.25133	-8.13639	-7.4606	-0.372212	-4.55942	-5.56091	3.93064	8.58115	1.22415	4.79729
915	1.7613	-2.07359	-3.04199	-8.00661	1.85435	-4.37152	-9.87266	-3.83416	-3.39753	-1.7375	-8.8573	5.99051	-1.95431	5.54754	-11.2381	-7.16986	5.14522	0.82561	-3.8979	-6.90383	-7.31249	-5.90417	-1.28656	-10.3503	-8.25979	-8.40256	-5.87117	-0.00978199	-8.50088	-4.21265	-10.1584	-7.44537	-2.93182	-3.12892	-9.52093	-5.13288	-9.36692	-4.81503	-4.81037	4.57322	-7.72364	-8.28643	-0.16339	-5.95449	-9.73669	3.72739	8.28939	1.4631	4.81475
916	0.960583	-1.69001	-3.55197	-4.86949	-1.64077	-3.22768	-10.0912	-4.21624	-4.9262	-2.56303	-9.36818	1.22065	-2.13952	5.4812	-11.2248	-7.19396	6.08412	3.11999	-2.55722	-6.17994	-5.70199	-4.06244	-1.29253	-10.4	-4.9106	-9.32287	-4.52319	0.0850788	-8.50289	-6.68699	-10.1695	-8.6111	-3.17072	-3.92575	-9.28747	-5.5029	0.811932	-4.97406	-6.70464	4.31542	-8.11014	-7.5256	0.385984	-4.65259	-8.9884	4.07124	8.43447	-3.01223	4.89188
917	-1.16693	-2.94572	-3.76836	-6.80943	0.162109	-3.63169	-9.90071	-4.40892	-3.65842	1.47225	-10.7474	2.03608	-1.92816	5.02339	-11.24	-7.78204	5.58675	2.16637	-3.10466	-5.30097	-6.69264	-5.71611	-1.29151	-10.3843	-7.06378	-9.42445	-5.89684	-2.35566	-8.50176	-1.75523	-10.5063	-8.50613	-1.38246	-3.74026	-9.56547	-5.46098	0.864119	-4.94474	-6.9089	4.05085	-8.12543	-8.42765	0.0860125	-5.42533	-7.90836	-6.30227	8.29342	-2.98755	5.20166
918	0.512866	-1.98462	-3.72864	-2.47731	1.29102	-3.0712	-6.63345	-4.25703	-3.32298	2.18654	-8.51626	6.78675	-1.85599	4.97851	-11.2726	-7.25634	5.87261	1.21843	-2.51473	-7.15447	-4.53519	-2.78232	-1.28607	-10.4136	-4.77321	-9.40375	-4.31667	-0.0287762	-8.51072	-3.85324	-10.4613	-8.4307	-3.08022	-3.04543	-9.54517	-5.08313	1.86863	-4.29633	-4.92783	4.55154	-7.74373	-7.46021	0.315676	-5.44443	-6.83246	-7.2788	8.32281	1.71189	5.33509
919	-0.763249	-2.85378	-3.67298	-3.79175	2.25761	-3.88404	-7.34108	-3.87607	-4.26933	1.29702	-7.69408	0.453687	-1.85769	5.61526	-8.2351	-7.29617	5.18486	1.48506	-3.64784	-4.97254	-7.13861	-3.92454	-1.29071	-10.4044	-5.76816	-8.36984	-4.15661	-0.68662	-8.44006	-6.68973	-9.97395	-8.36061	-1.18809	-3.93969	-9.53375	-5.71292	1.95919	-5.03818	-6.2461	5.15473	-8.1371	-7.57747	0.203777	-4.74854	-5.2356	-6.22074	2.32181	-2.97649	5.09258
920	1.60332	-1.69358	-3.71004	-1.90541	1.39595	-3.91807	-9.92327	-7.81191	6.78207	3.17467	-8.70875	2.68989	-1.78902	5.65721	-8.02489	-7.3841	5.20604	0.809285	-3.82732	-6.3314	-6.47589	-6.94357	-1.28685	-10.3524	-7.25096	-9.24475	-3.98375	-0.0953211	-8.51341	-2.00111	-10.4079	-8.09872	-3.36291	-3.33502	-9.5362	-5.60504	0.737224	-4.35643	-4.84733	4.38734	-8.05936	-8.29778	-0.0614668	-5.43803	-7.67106	-6.74922	2.24948	1.98219	5.26552
921	-1.19088	-1.91824	-3.98173	-7.05616	-5.80814	-3.76428	-8.16934	-7.76616	6.88789	-1.13688	-7.57049	3.81457	-2.01939	5.12476	-8.24321	-8.28012	-9.54756	1.04916	-4.70981	-5.32437	-7.40109	-2.88693	-1.29198	-10.4004	-4.91644	-8.58931	-4.10068	-1.52578	-8.50902	-4.41323	-10.3768	-7.82012	-3.25755	-3.03207	-9.18161	-4.91058	0.994246	-5.02398	-6.48416	3.70804	-7.57803	-8.31145	0.00654074	-5.5714	-9.53099	-6.4075	2.40399	-2.97417	4.61849
922	1.75679	-2.88496	-6.54475	-3.52377	-5.50699	-4.5156	-7.47916	-7.89932	6.86335	-0.00595807	-10.7739	5.2393	-2.05924	5.58444	-6.83364	-8.55136	-8.11692	1.3798	-8.31473	-5.84482	-5.25209	-5.31991	-1.29254	-3.0413	-6.63449	-8.54988	-4.35674	-0.266531	-8.48772	-1.30615	-10.6087	-8.34392	-1.27557	-3.19102	-9.54693	-5.11439	1.97349	-4.2668	-5.25241	5.13628	-8.43928	3.03171	-0.043266	-5.73527	-5.9351	-7.25998	2.45651	-2.96484	4.78743
923	-1.1679	-1.67246	-5.21152	-2.30969	-5.79868	-4.46474	-9.00819	-7.90885	6.99192	2.90298	-9.51647	1.41845	-2.0017	5.0999	-8.35125	-8.79074	-6.85728	1.50272	-7.5041	-6.75766	-7.60371	-4.52017	-1.28615	-2.7498	-6.97223	-8.36438	-3.94213	-7.73971	-8.32999	-6.66058	-9.99758	-8.22866	-1.05247	-3.89011	-9.54473	-5.18701	0.896535	-5.01457	-5.39534	4.63812	-7.23586	3.936	-10.8699	-5.63316	-8.77937	-7.29894	2.40377	-5.72892	4.9542
924	-0.95387	-2.57057	-6.8179	-5.41692	-5.51048	-3.55042	-7.39493	-7.92008	6.90937	-2.32515	-10.6949	6.21267	4.63016	5.52619	-7.26975	-8.83176	-8.21831	1.42964	-6.61915	-5.40686	-3.47697	-6.27044	-6.54145	-2.51905	-4.90175	-9.35232	-3.74903	-7.68572	-8.49835	-4.03542	-10.2634	-7.68885	-3.53667	-3.53872	-9.21864	-5.30404	1.08811	-4.86973	-5.56077	4.74358	-8.57156	3.58728	-9.69457	-5.56165	-10.7688	-6.61839	1.34404	-7.72333	5.31452
[truncated: 5,844 more rows]
